# Supplementary material for: Gold-catalyzed [5 + 2]-annulations of 1,3-diyn-1-amides with anthranils bearing no C(6)-substituents
Source: Royal Society of Chemistry journal article supplement (doi:10.1039/d1qo00026h), 2021-01-01

## ***Supporting Information***

### **Gold-catalyzed [5+2]-Annulations of 1,3-Diyn-1-amides with Anthranils Bearing no C(6)-substituents**

Yashwant Bhaskar Pandit,<sup>a</sup> Yan-Ting Jiang,<sup>a</sup> Jia-Jyun Jian,<sup>a</sup> Tai-Chi Chen<sup>b</sup>, Tung-Chun Kuo<sup>c</sup>, Mu-Jeng Cheng<sup>c\*</sup> and Rai-Shung Liu<sup>a\*</sup>

<sup>a</sup>Frontier Research Center of Matter Science and Technology, Department of Chemistry and <sup>b</sup>Department of Biomedical Engineering and Environmental Science, National Tsing-Hua University, Hsinchu, Taiwan, ROC, <sup>c</sup>*Department of Chemistry, National Cheng Kung University, Tainan, 701, Taiwan*

-----email: [rslu@mx.nthu.edu.tw](mailto:rslu@mx.nthu.edu.tw),

[mjcheng@mail.ncku.edu.tw](mailto:mjcheng@mail.ncku.edu.tw)

#### **Contents:**

|                                                                        |            |
|------------------------------------------------------------------------|------------|
| <b>(1) General procedures</b> -----                                    | <b>S2</b>  |
| <b>(2) Standard procedures for catalytic operations</b> -----          | <b>S3</b>  |
| <b>(3) Synthetic procedures for chemical functionalizations</b> -----  | <b>S4</b>  |
| <b>(4) References</b> -----                                            | <b>S5</b>  |
| <b>(5) Spectral data of key compounds</b> -----                        | <b>S6</b>  |
| <b>(6) X-ray crystallographic data of compounds (3a, 4a, 5a)</b> ----- | <b>S33</b> |
| <b>(7) Computational details</b> -----                                 | <b>S60</b> |
| <b>(8) Spectra of key Compounds</b> -----                              | <b>S90</b> |

## (1) Representative Synthetic procedures

### 1.1. General procedure:

Unless otherwise noted, all reactions were carried out under a N<sub>2</sub> atmosphere in reaction tube. Tetrahydrofuran was dried with sodium benzophenone and distilled before use. Dichloroethane were dried over CaH<sub>2</sub> and distilled before use. The triethylamine (Et<sub>3</sub>N) were stored over 4 Å molecular sieves prior to use. Reagents were purchased from commercial sources and used without purification, unless otherwise stated. Reactions were magnetically stirred and monitored by thin layer chromatography carried out on 0.25 mm E. Merck silica gel plate (60f- 254) using UV light as visualizing agents and/or potassium permanganate (KMnO<sub>4</sub>). <sup>1</sup>H NMR and <sup>13</sup>C NMR spectra were recorded on a Bruker 400, Varian 400, 500, and 600 MHz spectrometers using chloroform-*d* (CDCl<sub>3</sub>) as the internal standard. Chemical shifts are reported in parts per million (ppm). Multiplicities are indicated by s (singlet), d (doublet), t (triplet), q (quartet), and m (multiplet). Coupling constants *J* are reported in Hertz (Hz). Benzisoxazoles (**2a-2i**) were synthesized following similar synthetic procedure [S5]. 1,3-dynamides **1a**, **1d**, **1i**, **1j**, **1w** were synthesized using similar procedures. [s4b] The other ynamides **12a**, **12b** were synthesized using similar procedure. [s4c]

### 1.2. Synthetic procedure for preparation of starting materials:

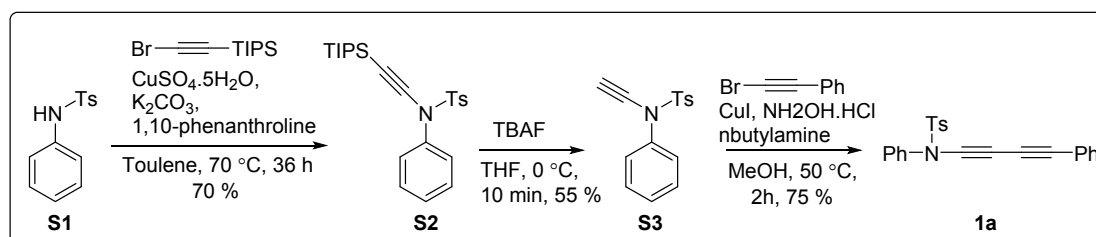

Tosyl amide **S1** was synthesized as per literature procedure. [s1]  
In dry sealed tube, a mixture of **S1** (1.0 g, 4.05 mmol), K<sub>2</sub>CO<sub>3</sub> (1.1 g, 8.1 mmol), CuSO<sub>4</sub>·5H<sub>2</sub>O (101 mg, 0.4 mmol), and 1,10-phenanthroline (146 mg, 0.8 mmol) was added a solution of (bromoethynyl)triisopropylsilane (1.15 g, 4.5 mmol) in dry toluene. The reaction mixture was capped and heated in an oil bath at 70°C for 36 h while being monitored with TLC analysis. After completion, the reaction mixture was cooled to room temperature and diluted with ether and filtered through celite, and the filtrate was concentrated under vacuum. The crude products were purified by flash column chromatography using silica gel (eluent: EA/Hexane) to afford the desired product **S2**

(70%) as a yellow solid. <sup>[s2]</sup> To a solution of N-((triisopropylsilyl) ethynyl) benzenesulfonamide **S2** (1.0 g, 2.3 mmol) in THF (10 mL) was added n-tetrabutyl ammonium fluoride (1.0M in THF, 3.5 mL, 3.5 mmol) at 0 °C, and the resulting mixture was stirred at 0 °C for 10 mins. The crude products were purified by flash column chromatography using silica gel (eluent: EA/Hexane) to afford the desired ynamide substrate **S3** (55%) as a white solid. <sup>[s2]</sup> In a two-neck flask equipped with a reflux condenser were introduced under nitrogen atmosphere CuI (11 mg, 0.06 mmol) and NH<sub>2</sub>OH·HCl (23 mg, 0.3 mmol) in MeOH (2 mL). To the mixture was added *n*-butylamine (162 mg, 0.2 mL, 2.2 mmol, 2 equiv.) followed by MeOH (1.5 mL) and ynamide **S3** (300 mg, 1.1 mmol). The resulting solution was heated to 50 °C and solution of (bromoethynyl)benzene (240mg, 1.3 mmol) <sup>[s3b]</sup> in MeOH (1.5 mL) was added slowly within 10 minutes. The reaction mixture was further heated at 50 °C for 2 h. Then ether and brine were added, the layers separated, and the aqueous layer was extracted 3 times with ether. The combined organic layers were washed with brine, dried over MgSO<sub>4</sub> and concentrated under reduced pressure. The residue was purified by flash column chromatography using silica gel (eluent: EA and Hexane) to afford the desired 4-methyl-N-phenyl-N-(phenylbuta-1,3-diyne-1-yl)benzenesulfonamide **1a** (246 mg, 0.66 mmol, 75%) as a yellow solid.<sup>[s4]</sup> Similarly, other diynamide (**1b-1w**) were synthesized.

## (2) Standard procedures for catalytic operations]

Standard procedure for the synthesis of 4-methyl-N-phenyl-N-((1*aR*,7*bS*)-1*a*-(phenylethynyl)-1*a*,7*b*-dihydrooxireno[2,3-*c*]quinolin-2-yl)benzenesulfonamide (**3a**) and N-(7-formyl-3-(phenylethynyl)-1*H*-indol-2-yl)-4-methyl-N-phenylbenzenesulfonamide (**4a**).

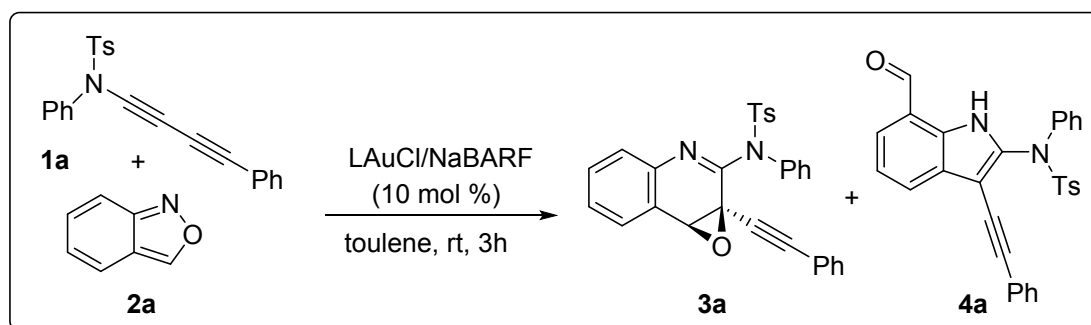

A catalytic tube was charged with LAuCl (11.4 mg, 0.021) and NaBARF (19.1 mg, 0.021 mmol), and to this mixture was added dry toluene (0.5 mL). The resulting mixture was stirred at room temperature for 10 min. To this mixture was added a 2.5 ml dry toluene solution of 4-methyl-N-phenyl-N-(phenylbuta-1,3-diyne-1-

yl)benzenesulfonamide (**1a**) (80 mg, 0.215 mmol) and benzo[*c*]isoxazole (**2a**) (35 mg, 0.237 mmol). After stirring at room temperature for 3 h, the reaction mixture was filtered over a short celite bed, concentrated, and eluted through a silica column (5-8% EA/hexane) to give the desired 4-methyl-N-phenyl-N-((1*aR*,7*bS*)-1a-(phenylethynyl)-1*a*,7*b*-dihydrooxireno[2,3-*c*]quinolin-2-yl)benzenesulfonamide (**3a**) in (71.9 mg, 0.14 mmol, 68%) as a white solid and N-(7-formyl-3-(phenylethynyl)-1*H*-indol-2-yl)-4-methyl-N-phenylbenzenesulfonamide (**4a**) in (18 mg, 0.03 mmol, 17 %) as a yellow solid.

### (3) Synthetic procedures for chemical functionalizations:

#### (3.1) Standard procedure for the synthesis of 4-methyl-N-phenyl-N-(2-phenylfuro[3,2-*c*]quinolin-4-yl)benzenesulfonamide (**5a**)

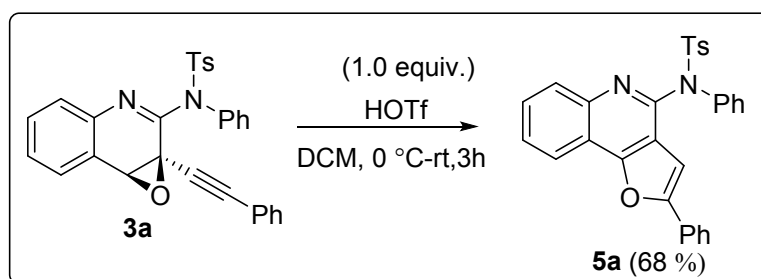

To a solution of 4-methyl-N-phenyl-N-((1*aR*,7*bS*)-1a-(phenylethynyl)-1*a*,7*b*-dihydrooxireno[2,3-*c*]quinolin-2-yl)benzenesulfonamide **3a** (50 mg, 0.102 mmol) in 1 ml DCM was added triflic acid (16.5 mg, 0.011 mmol) slowly at 0°C, after 10 min allowed the reaction solution at room temperature around 3 hours. Monitored the reaction by TLC, once reaction completed add 2 ml water and extract with ether (2 ml×3) times. The solution was concentrated under reduced pressure. The crude mass was purified by silica gel chromatography (EA:Hexane) gave the desired product 4-methyl-N-phenyl-N-(2-phenylfuro[3,2-*c*]quinolin-4-yl)benzenesulfonamide **5a** (34 mg, 0.069, 68 %) as white solid.

#### (3.2) Standard procedure for the synthesis of (*E*)-3-styryl-1,2,3,4-tetrahydroquinolin-3-ol (**9**)

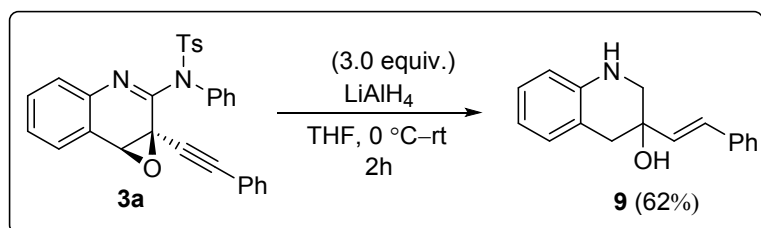

To a solution of **3a** (50 mg, 0.10 mmol) in 3 ml dry THF, was added Lithium aluminium hydride (11 mg, 0.30 mmol) at 0 °C, monitored the reaction by TLC. Add 3 ml water



after completion of the reaction and extract with ether (2 ml×3) times. After concentrated under reduced pressure, crude residue was purified by silica gel column chromatography obtained **9** (16 mg, 0.06 mmol, 62 %) as white solid.

**(3.3) Standard procedure for the synthesis of 4-methyl-N-phenyl-N-(3-(phenylethynyl)quinolin-2-yl)benzenesulfonamide (10)**

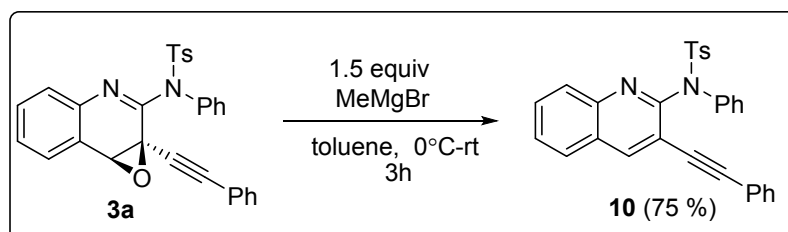

To a solution of **3a** (80 mg, 0.16 mmol) in 2 ml dry toluene was added methyl magnesium bromide (3.0 M, 82 $\mu$ L, 0.245mmol) at  $^{\circ}$ C. Allowed the reaction at room temperature for 3 hours. Once reaction completed, add 2 ml NH<sub>4</sub>Cl and extract with ether (2 ml×3) times. The solution was concentrated under reduced pressure. Crude mass was purified by silica gel chromatography (EA:Hexane) delivered **10** (58 mg, 0.12 mmol, 75 %) as white solid.

**(3.4) Standard procedure for the synthesis of 4-methyl-N-(3-phenethylquinolin-2-yl)-N-phenylbenzenesulfonamide (11)**

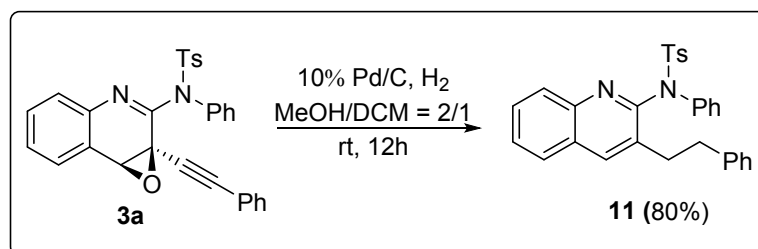

To a solution of 10% Pd/C (50.0 mg) in methanol (2 mL) was added methanol (3 mL) solution of **3a** (80.0 mg, 0.163 mmol), and reaction mixture was stirred for 12 hours at room temperature. The reaction mixture was passed through a short bed of silica after completion of reaction, washed with ethyl acetate, and concentrated. The crude product was purified by flash chromatography on silica gel column (EA/Hexane) to afford **11** (62.4 mg, 0.13 mmol, 80%) as a yellow liquid.

**(4) References:**

[s1] X. Nie, G. Wang; *J. Org. Chem.*, **2006**, *71*, 4734-4741.

[s2] a) A. Hentz, P. Retailleau, V. Gandon, K. Cariou, R. H. Dodd; *Angew. Chem. Int.*

*Ed.*, **2014**, *53*, 8333-8337. b) Y. C. Hsu, S. A. Hsieh, R. S. Liu; *Chem. Eur. J.* **2019**, *25*, 5288-5297.

[s3] a) Y. Tang, L. Shen, B. T. Dellaria, R. P. Hsung; *Tetrahedron Lett.*, **2008**, *49*, 6404-6409. b) Y. Gao, G. Wu. Q. Zhou, J. Wang; *Angew. Chem. Int. Ed.*, **2018**, *57*, 2716-2720.

[s4] a) I. Talbi, C. Alayrac, J. Lohier, S. Touil, B. Witulski; *Org. Lett.*, **2016**, *18*, 2656-2659. b) M. Skaria, Y. C. Hsu, Y. T. Jiang, M. Y. Lu, T. C. Kuo, M. J. Cheng, R. S. Liu; *Org. Lett.* **2020**, *22*, 4478-4482. c) L. Q. Yang, K. B. Wang, C. Y. Li; *Eur. J. Org. Chem.* **2013**, 2775-2779

[s5] (a) Compound (**2a-2h**): a) R. L. Sahani, R-S. Liu; *Angew. Chem. Int. Ed.*, **2017**, *56*, 12736-12740; b) J. Chauhan, S. Fletcher, *Tetrahedron Lett.* **2012**, *53*, 4951- 4954; c) H. Jin, L. Huang, J. Xie, M. Rudolph, F. Rominger and A. S. K. Hashmi, *Angew. Chem. Int. Ed.*, **2016**, *55*, 794-797; d) H. Jin, B. Tian, X. Song, J. Xie, M. Rudolph, F. Rominger, A. S. K. Hashmi, *Angew. Chem. Int. Ed.* **2016**, *55*, 12688- 12692; e) F. Wang, P. Xu, S. Y. Wang, S. J. Ji, *Org. Lett.* **2018**, *20*, 2204-2207.

(b) Compound **2i**: M. Chiarini, L. D. Vecchio, F. Marinelli, L. Rossi, A. Arcadi, *Synthesis*, **2016**, *48*, 3017-3030.

Note: 1) The spectroscopic data of the 1,3-diyamides **1b**, **1c**, **1e**, **1f**, **1g**, **1h**, **1k**, **1l**, **1m**, **1n**, **1o**, **1p**, **1q**, **1r**, **1s**, **1t** and **1u** are provided below.

2) As **4o** yield mention in manuscript was less than 5 % that's why spectral data of compound **4o** was not provided because **4o** was difficult to isolate, its yield calculated from crude nmr.

#### (4) Spectral data for compounds:

Spectral data for *N*-(4-chlorophenyl)-4-methyl-*N*-(phenylbuta-1,3-diyn-1-yl)benzenesulfonamide (**1b**)

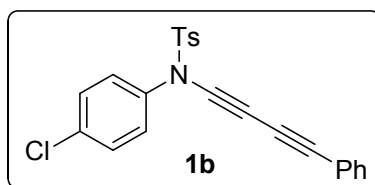

Yellow solid; (523 mg, 1.29 mmol, 79%); <sup>1</sup>H NMR (600 MHz, CDCl<sub>3</sub>): δ 7.58 (d, *J* = 8.4 Hz, 2H), 7.45 (td, *J* = 8.4, 1.2 Hz, 2H), 7.35-7.26 (m, 7H), 7.18-7.16 (m, 2H), 2.43 (s, 3H); <sup>13</sup>C NMR (150 MHz, CDCl<sub>3</sub>): δ 145.6, 136.5, 134.6, 132.6, 132.4, 129.9, 129.4, 129.1, 128.4, 128.1, 127.5, 121.7, 81.7, 73.7, 73.1, 58.1, 21.7; ESI-MS (M+Na) calcd.

for  $C_{23}H_{16}ClNNaO_2S$ : 428.0488; Found: 428.0531.

**Spectral data for *N*-(4-bromophenyl)-4-methyl-*N*-(phenylbuta-1,3-diyn-1-yl)benzenesulfonamide (1c)**

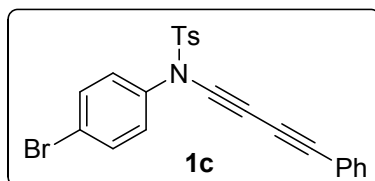

Yellow solid; (520 mg, 1.15 mmol, 81 %);  $^1H$  NMR (600 MHz,  $CDCl_3$ ):  $\delta$  7.59 (d,  $J$  = 8.4 Hz, 2H), 7.45 (t,  $J$  = 7.8 Hz, 4H), 7.33-7.28 (m, 5H), 7.11 (d,  $J$  = 8.4, 2H), 2.43 (s, 3H);  $^{13}C$  NMR (150 MHz,  $CDCl_3$ ):  $\delta$  145.7, 137.1, 132.4, 132.3, 129.9, 129.6, 129.1, 128.4, 128.1, 127.7, 122.6, 121.7, 81.7, 73.6, 73.1, 58.2, 21.7; ESI-MS ( $M+Na$ ) calcd. for  $C_{23}H_{16}BrNNaO_2S$ : 471.9983; Found: 473.9956.

**Spectral data for 4-methyl-*N*-(phenylbuta-1,3-diyn-1-yl)-*N*-(*p*-tolyl)benzenesulfonamide (1e)**

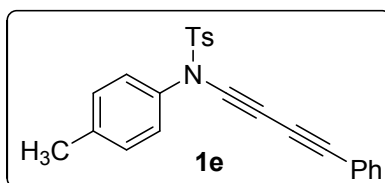

Yellow liquid; (560 mg, 1.45 mmol, 83%);  $^1H$  NMR (600 MHz,  $CDCl_3$ ):  $\delta$  7.60 (d,  $J$  = 8.4 Hz, 2H), 7.44 (d,  $J$  = 7.8 Hz, 2H), 7.33-7.27 (m, 5H), 7.13-7.07 (m, 4H), 2.43 (s, 3H), 2.33 (s, 3H);  $^{13}C$  NMR (150 MHz,  $CDCl_3$ ):  $\delta$  145.3, 138.9, 135.4, 133.0, 132.3, 129.9, 129.7, 128.9, 128.4, 128.2, 126.3, 121.9, 81.3, 74.6, 73.5, 57.4, 21.7, 21.1; ESI-MS ( $M+Na$ ) calcd. for  $C_{24}H_{19}NNaO_2S$ : 408.1034; Found: 408.1031.

**Spectral data for *N*-(3-chlorophenyl)-4-methyl-*N*-(phenylbuta-1,3-diyn-1-yl)benzenesulfonamide (1f)**

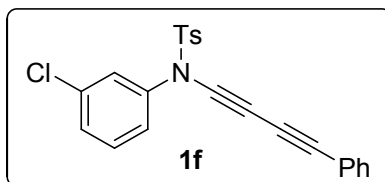

Yellow liquid; (274 mg, 0.67 mmol, 69 %);  $^1H$  NMR (600 MHz,  $CDCl_3$ ):  $\delta$  7.61 (d,  $J$  = 8.4 Hz, 2H), 7.47-7.45 (m, 2H), 7.34-7.24 (m, 8H), 7.19-7.16 (m, 1H), 2.44 (s, 3H);  $^{13}C$  NMR (150 MHz,  $CDCl_3$ ):  $\delta$  145.7, 139.1, 134.7, 132.7, 132.4, 130.2, 129.9, 129.2, 128.8, 128.4, 128.2, 126.2, 124.3, 121.8, 81.8, 73.5, 73.1, 58.5, 21.8; EI-MS calcd. for  $C_{23}H_{16}ClNO_2S$ : 405.0590; Found: 405.0585.

**Spectral data for *N*-(3-bromophenyl)-4-methyl-*N*-(phenylbuta-1,3-diyn-1-**

**yl)benzenesulfonamide (1g)**

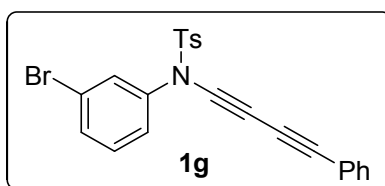

Brown Liquid; (387 mg, 0.85 mmol, 86 %);  $^1\text{H}$  NMR (600 MHz,  $\text{CDCl}_3$ ):  $\delta$  7.60 (d,  $J = 8.0$  Hz, 2H), 7.45 (t,  $J = 7.5$  Hz, 3H), 7.38 (s, 1 H), 7.35-7.28 (m, 5H), 7.23-7.18 (m, 2H), 2.44 (s, 3H);  $^{13}\text{C}$  NMR (150 MHz,  $\text{CDCl}_3$ ):  $\delta$  146.0, 139.5, 132.9, 132.7, 131.9, 130.7, 130.1, 129.4, 129.3, 128.7, 128.4, 125.1, 122.7, 121.9, 82.1, 73.7, 73.4, 58.7, 22.0; EI-MS calcd. for  $\text{C}_{23}\text{H}_{16}\text{BrNO}_2\text{S}$ : 449.0085; Found: 449.0080.

**Spectral data for N-(3-methoxyphenyl)-4-methyl-N-(phenylbuta-1,3-dien-1-yl)benzenesulfonamide (1h)**

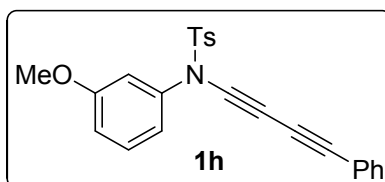

Brown Liquid; (186 mg, 0.46 mmol, 70%);  $^1\text{H}$  NMR (600 MHz,  $\text{CDCl}_3$ ):  $\delta$  7.62 (d,  $J = 8.4$  Hz, 2H), 7.46-7.44 (m, 2H), 7.32-7.27 (m, 5H), 7.20 (t,  $J = 8.4$  Hz, 1H), 6.80-6.77 (m, 2H), 3.74 (s, 3H), 2.43 (s, 3H);  $^{13}\text{C}$  NMR (150 MHz,  $\text{CDCl}_3$ ):  $\delta$  160.0, 145.4, 138.9, 133.0, 132.3, 129.8, 129.7, 128.9, 128.4, 128.2, 121.9, 118.3, 114.7, 111.9, 81.5, 74.2, 73.4, 57.8, 55.5, 21.7; EI-MS calcd. for  $\text{C}_{24}\text{H}_{19}\text{NO}_3\text{S}$ : 401.1086; Found: 401.1083

**Spectral data for N-butyl-4-methyl-N-(phenylbuta-1,3-dien-1-yl)benzenesulfonamide (1k)**

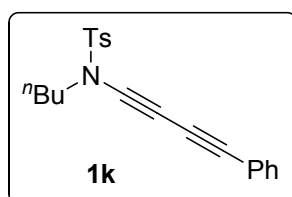

White solid; (1.50 g, 4.27 mmol, 74%);  $^1\text{H}$  NMR (400 MHz,  $\text{CDCl}_3$ ):  $\delta$  7.80 (d,  $J = 8.0$  Hz, 2H), 7.45 (d,  $J = 78.0$  Hz, 2H), 7.36-7.26 (m, 5H), 3.34 (t,  $J = 7.2$  Hz, 2H), 2.44 (s, 3H), 1.66-1.57 (m, 2H), 1.37-1.27 (m, 2H), 0.89 (t,  $J = 7.2$  Hz, 3H);  $^{13}\text{C}$  NMR (100 MHz,  $\text{CDCl}_3$ ):  $\delta$  145.0, 134.4, 132.3, 130.0, 128.9, 128.3, 127.5, 122.0, 80.9, 74.1, 73.5, 58.1, 51.3, 29.8, 21.6, 19.4, 13.5; EI-MS (M) calcd. for  $\text{C}_{21}\text{H}_{21}\text{NO}_2\text{S}$ : 351.1293; Found: 351.1296.

**Spectral data for N-cyclopropyl-4-methyl-N-(phenylbuta-1,3-dien-1-yl)benzenesulfonamide (1l)**

**yl)benzenesulfonamide (1l)**

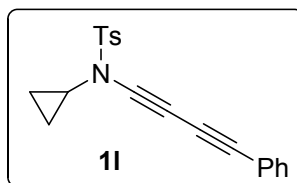

Yellow liquid; (484 mg, 1.44 mmol, 68 %);  $^1\text{H}$  NMR (600 MHz,  $\text{CDCl}_3$ ):  $\delta$  7.84 (d,  $J = 8.4$  Hz, 2H), 7.46-7.44 (m, 2H), 7.36 (d,  $J = 8.4$  Hz, 2H), 7.37-7.27 (m, 3H), 2.80-2.77 (m, 1H), 2.45 (s, 3H), 0.87-0.84 (m, 2H), 0.80-0.76 (m, 2H);  $^{13}\text{C}$  NMR (150 MHz,  $\text{CDCl}_3$ ):  $\delta$  145.2, 133.9, 132.3, 129.9, 128.9, 128.4, 127.9, 122.0, 81.1, 73.5, 73.4, 57.9, 32.9, 21.7, 6.7; ESI-MS ( $\text{M}+\text{Na}$ ) calcd. for  $\text{C}_{20}\text{H}_{17}\text{NNaO}_2\text{S}$ : 358.08788; Found: 358.0873

**Spectral data for N-isopropyl-4-methyl-N-(phenylbuta-1,3-diyn-1-yl)benzenesulfonamide (1m)**

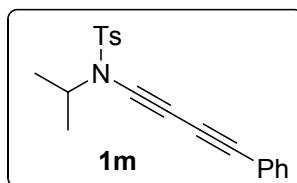

Yellow liquid; (259 mg, 0.70 mmol, 73%);  $^1\text{H}$  NMR (600 MHz,  $\text{CDCl}_3$ ):  $\delta$  7.80 (d,  $J = 8.4$  Hz, 2H), 7.47-7.45 (m, 2H), 7.34-7.28 (m, 5H), 4.16-4.10 (m, 1H), 2.43 (s, 3H), 1.12 (q,  $J = 7.2$  Hz, 6H);  $^{13}\text{C}$  NMR (150 MHz,  $\text{CDCl}_3$ ):  $\delta$  144.9, 135.6, 132.3, 129.9, 128.9, 128.4, 127.4, 122.1, 80.8, 73.8, 71.4, 60.1, 53.2, 21.7, 20.9; ESI-MS ( $\text{M}+\text{Na}$ ) calcd. for  $\text{C}_{20}\text{H}_{19}\text{NNaO}_2\text{S}$ : 360.1034; Found: 360.1034.

**Spectral data for N-phenyl-N-(phenylbuta-1,3-diyn-1-yl)benzenesulfonamide (1n)**

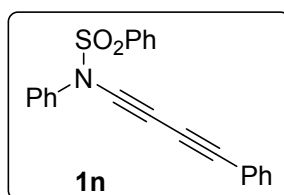

White solid; (533 mg, 1.49 mmol, 45%);  $^1\text{H}$  NMR (400 MHz,  $\text{CDCl}_3$ ):  $\delta$  7.73 (d,  $J = 7.2$  Hz, 2H), 7.66 (t,  $J = 7.2$  Hz, 1H), 7.51 (d,  $J = 7.2$  Hz, 2H), 7.47 (dd,  $J = 8.0, 1.2$  Hz, 2H), 7.32~7.28 (m, 6H), 7.23-7.22 (m, 2H);  $^{13}\text{C}$  NMR (100 MHz,  $\text{CDCl}_3$ ):  $\delta$  137.8, 135.7, 134.2, 132.3, 129.3, 129.1, 128.8, 128.3, 128.0, 126.2, 121.7, 81.5, 74.1, 73.2, 57.7, one 'C' merge with others; ESI-MS ( $\text{M}+\text{Na}$ ) calcd. for  $\text{C}_{22}\text{H}_{15}\text{NNaO}_2\text{S}$ : 380.0721; Found: 380.07139.

**Spectral data for N-phenyl-N-(phenylbuta-1,3-diyn-1-yl)methanesulfonamide (1o)**

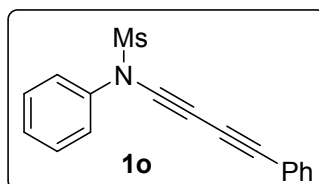

Brown solid; (324 mg, 0.87 mmol, 75%);  $^1\text{H}$  NMR (400 MHz,  $\text{CDCl}_3$ ):  $\delta$  7.51-7.28(m, 10H);  $^{13}\text{C}$  NMR (100 MHz,  $\text{CDCl}_3$ ):  $\delta$  137.7, 132.3, 129.6, 129.1, 128.8, 128.4, 125.6, 121.7, 81.9, 73.3, 72.9, 58.4, 37.6; ESI-MS (M+H) calcd. for  $\text{C}_{17}\text{H}_{14}\text{NO}_2\text{S}$ : 296.0745; Found: 296.0743.

**Spectral data for *N*-((4-chlorophenyl)buta-1,3-diyne-1-yl)-4-methyl-*N*-phenylbenzenesulfonamide (1p)**

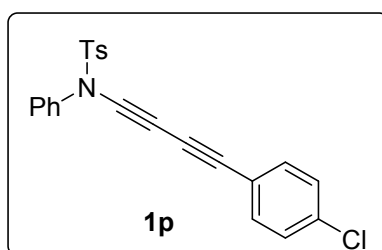

White solid; (940 mg, 2.32 mmol, 63%);  $^1\text{H}$  NMR (400 MHz,  $\text{CDCl}_3$ ):  $\delta$  7.58 (d,  $J$  = 8.4 Hz, 2H), 7.38-7.20 (m, 11H), 2.42 (s, 3H);  $^{13}\text{C}$  NMR (100 MHz,  $\text{CDCl}_3$ ):  $\delta$  145.4, 137.9, 135.1, 133.5, 132.9, 129.7, 129.3, 128.8, 128.1, 126.3, 120.4, 80.2, 74.9, 74.4, 57.5, 21.7, one 'C' merge with others; ESI-MS (M+Na) calcd. for  $\text{C}_{23}\text{H}_{16}\text{ClNNaO}_2\text{S}$ : 428.0488; Found: 428.05002.

**Spectral data for *N*-((4-bromophenyl)buta-1,3-diyne-1-yl)-4-methyl-*N*-phenylbenzenesulfonamide (1q)**

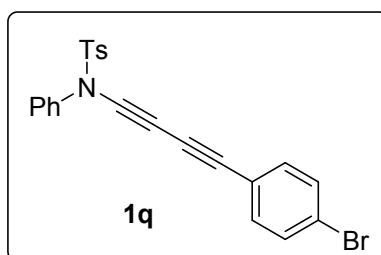

White solid; (860 mg, 1.91 mmol, 52%);  $^1\text{H}$  NMR (400 MHz,  $\text{CDCl}_3$ ):  $\delta$  7.59 (d,  $J$  = 8.4 Hz, 2H), 7.42 (d,  $J$  = 8.4 Hz, 2H), 7.32-7.27 (m, 7H), 7.24-7.20 (m, 2H), 2.42 (s, 3H);  $^{13}\text{C}$  NMR (100 MHz,  $\text{CDCl}_3$ ):  $\delta$  145.4, 137.9, 133.6, 132.9, 131.7, 129.7, 129.3, 128.7, 128.1, 126.3, 123.4, 120.9, 80.3, 74.9, 74.6, 57.6, 21.7; ESI-MS (M+Na) calcd. for  $\text{C}_{23}\text{H}_{16}\text{BrNNaO}_2\text{S}$ : 471.9983; Found: 471.99804.

**Spectral data for 4-methyl-*N*-phenyl-*N*-((4-(trifluoromethyl)phenyl)buta-1,3-diyne-1-yl)benzenesulfonamide (1r)**

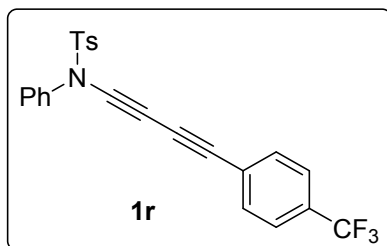

White solid; (350 mg, 0.80 mmol, 70%);  $^1\text{H}$  NMR (400 MHz,  $\text{CDCl}_3$ ):  $\delta$  7.59 (d,  $J$  = 5.6 Hz, 2H), 7.54 (s, 4H), 7.35-7.32 (m, 3H), 7.29 (d,  $J$  = 5.6 Hz, 2H), 7.25-7.21 (m, 2H), 2.43 (s, 3H);  $^{13}\text{C}$  NMR (150 MHz,  $\text{CDCl}_3$ ):  $\delta$  145.6, 137.7, 132.9, 132.4, 130.7, 130.5, 130.3, 130.1, 129.8, 129.3, 128.8, 128.1, 126.4, 126.3, 125.8, 125.3, 124.6, 122.8, 121.9, 79.9, 75.8, 75.6, 57.4, 21.7; ESI-MS ( $\text{M}+\text{Na}$ ) calcd. for  $\text{C}_{24}\text{H}_{16}\text{F}_3\text{NNaO}_2\text{S}$ : 462.0752; Found: 462.07779.

**Spectral data for 4-methyl-N-phenyl-N-(p-tolylbuta-1,3-diyne-1-yl)benzene sulfonamide (1s)**

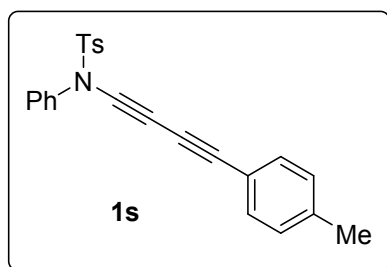

Yellow solid; (247 mg, 0.64 mmol, 68%);  $^1\text{H}$  NMR (400 MHz,  $\text{CDCl}_3$ ):  $\delta$  7.59 (d,  $J$  = 8.4 Hz, 2H), 7.36-7.21 (m, 9H), 7.09 (d,  $J$  = 8.0 Hz, 2H), 2.42 (s, 3H), 2.32 (s, 3H);  $^{13}\text{C}$  NMR (100 MHz,  $\text{CDCl}_3$ ):  $\delta$  145.3, 139.4, 138.0, 132.8, 132.2, 129.7, 129.2, 129.1, 128.6, 128.1, 126.2, 118.7, 81.7, 74.0, 72.7, 57.8, 21.6, 21.5; ESI-MS ( $\text{M}+\text{H}$ ) calcd. for  $\text{C}_{24}\text{H}_{20}\text{NO}_2\text{S}$ : 386.1215; Found: 386.12195.

**Spectral data for N-((4-methoxyphenyl)buta-1,3-diyne-1-yl)-4-methyl-N-phenylbenzenesulfonamide (1t)**

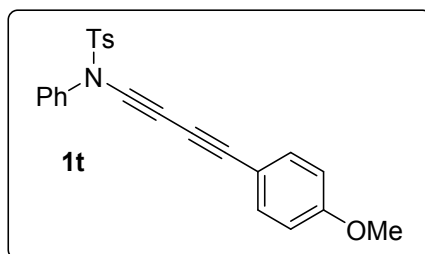

Yellow solid; (720 mg, 1.79 mmol, 49%);  $^1\text{H}$  NMR (400 MHz,  $\text{CDCl}_3$ ):  $\delta$  7.59 (d,  $J$  = 8.4 Hz, 2H), 7.40 (d,  $J$  = 8.4 Hz, 2H), 7.32-7.21 (m, 7H), 6.81 (d,  $J$  = 8.8 Hz, 2H), 3.78 (s, 3H), 2.42 (s, 3H);  $^{13}\text{C}$  NMR (100 MHz,  $\text{CDCl}_3$ ):  $\delta$  160.2, 145.3, 138.1, 134.1, 133.0, 129.7, 129.2, 128.6, 128.1, 126.3, 114.2, 113.8, 81.6, 73.8, 72.1, 57.9, 55.3, 21.7; ESI-MS ( $\text{M}+\text{Na}$ ) calcd. for  $\text{C}_{24}\text{H}_{19}\text{NNaO}_3\text{S}$ : 424.0983; Found: 424.09817.

**Spectral data for *N*-((3-chlorophenyl)buta-1,3-diyne-1-yl)-4-methyl-*N*-phenylbenzenesulfonamide (1u)**

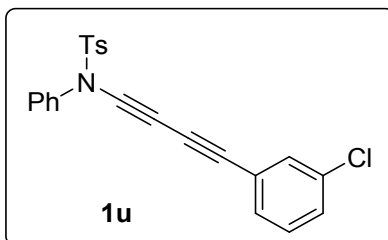

Yellow solid; (263 mg, 0.64 mmol, 44%);  $^1\text{H NMR}$  (400 MHz,  $\text{CDCl}_3$ ):  $\delta$  7.58 (d,  $J = 5.6$  Hz, 2H), 7.42 (s, 1H), 7.33-7.28 (m, 7H), 7.23-7.20 (m, 3H), 2.43 (s, 3H);  $^{13}\text{C NMR}$  (150 MHz,  $\text{CDCl}_3$ ):  $\delta$  145.5, 137.8, 134.2, 132.9, 132.0, 130.4, 129.8, 129.6, 129.3, 129.3, 128.8, 128.1, 126.3, 123.7, 79.9, 75.0, 74.6, 57.4, 21.7; ESI-MS ( $\text{M}+\text{Na}$ ) calcd. for  $\text{C}_{23}\text{H}_{16}\text{ClNNaO}_2\text{S}$ : 428.0488; Found: 428.04764.

**Spectral data for 4-methyl-*N*-phenyl-*N*-((1*aR*,7*bS*)-1*a*-(phenylethynyl)-1*a*,7*b*-dihydrooxireno[2,3-*c*]quinolin-2-yl)benzenesulfonamide (3a)**

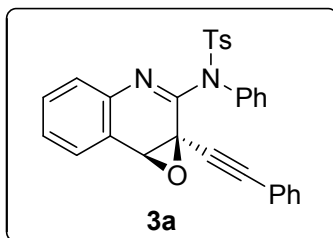

White solid; (71.9 mg, 0.14 mmol, 68%);  $^1\text{H NMR}$  (400 MHz,  $\text{CDCl}_3$ ):  $\delta$  7.76 (d,  $J = 8.0$  Hz, 2H), 7.58-7.48 (m, 3H), 7.40-7.35 (m, 5H), 7.34-7.29 (m, 5H), 7.25 (d,  $J = 8.0$  Hz, 2H), 4.65 (s, 1H), 2.40 (s, 3H), two 'C' merge with others;  $^{13}\text{C NMR}$  (100 MHz,  $\text{CDCl}_3$ ):  $\delta$  151.6, 143.9, 141.0, 136.9, 136.1, 131.9, 130.4, 130.4, 129.6, 129.2, 129.1, 128.7, 128.6, 128.3, 127.4, 123.3, 121.3, 86.5, 83.2, 65.5, 53.3, 21.5; ESI-MS ( $\text{M}+\text{H}$ ) calcd. for  $\text{C}_{30}\text{H}_{23}\text{N}_2\text{O}_3\text{S}$ : 491.1423; Found: 491.14231

**Spectral data for *N*-(4-chlorophenyl)-4-methyl-*N*-((1*aR*,7*bS*)-1*a*-(phenylethynyl)-1*a*,7*b*-dihydrooxireno[2,3-*c*]quinolin-2-yl)benzenesulfonamide (3b)**

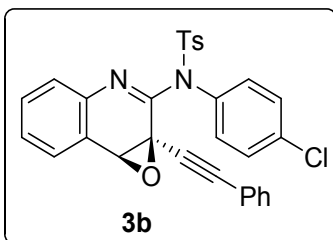

White solid; (61 mg, 0.11 mmol, 80%);  $^1\text{H NMR}$  (600 MHz,  $\text{CDCl}_3$ ):  $\delta$  7.74 (d,  $J = 8.4$  Hz, 2H), 7.59 (d,  $J = 6.6$  Hz, 1H), 7.53-7.49 (m, 2H), 7.35-7.25 (m, 10H), 7.25 (d,  $J =$



8.4Hz, 2H), 4.65 (s, 1H), 2.41 (s, 3H);  $^{13}\text{C}$  NMR (150 MHz,  $\text{CDCl}_3$ ):  $\delta$  151.3, 144.3, 140.9, 135.7, 135.3, 134.9, 131.9, 131.6, 130.6, 129.7, 129.3, 128.9, 128.8, 128.7, 128.4, 127.6, 123.3, 121.1, 86.9, 83.0, 65.5, 53.2, 21.6, one 'C' merge with others; ESI-MS ( $\text{M}+\text{Na}$ ) calcd. for  $\text{C}_{30}\text{H}_{21}\text{ClN}_2\text{NaO}_3\text{S}$ : 547.0859; Found: 547.0856.

**Spectral data for *N*-(4-bromophenyl)-4-methyl-*N*-((1*aR*,7*bS*)-1*a*-(phenylethynyl)-1*a*,7*b*-dihydrooxireno[2,3-*c*]quinolin-2-yl)benzenesulfonamide (3c)**

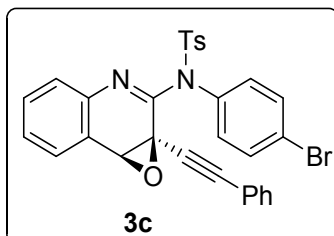

White solid; (96 mg, 0.16 mmol, 76 %);  $^1\text{H}$  NMR (600 MHz,  $\text{CDCl}_3$ ):  $\delta$  7.74 (d,  $J = 8.4$  Hz, 2H), 7.58 (d,  $J = 7.2$  Hz, 1H), 7.53-7.48 (m, 4H), 7.37-7.30 (m, 6H), 7.27-7.23 (m, 4H), 4.65 (s, 1H), 2.41 (s, 3H);  $^{13}\text{C}$  NMR (150 MHz,  $\text{CDCl}_3$ ):  $\delta$  151.2, 144.3, 140.8, 135.8, 135.7, 131.9, 131.9, 131.8, 130.6, 129.7, 128.8, 128.7, 128.4, 127.6, 123.3, 123.1, 121.0, 86.9, 82.9, 65.5, 53.2, 21.6, one 'C' merge with others; ESI-MS ( $\text{M}+\text{Na}$ ) calcd. for  $\text{C}_{30}\text{H}_{21}\text{BrN}_2\text{NaO}_3\text{S}$ : 591.0354; Found: 591.0361

**Spectral data for *N*-(4-methoxyphenyl)-4-methyl-*N*-((1*aR*,7*bS*)-1*a*-(phenylethynyl)-1*a*,7*b*-dihydrooxireno[2,3-*c*]quinolin-2-yl)benzenesulfonamide (3d)**

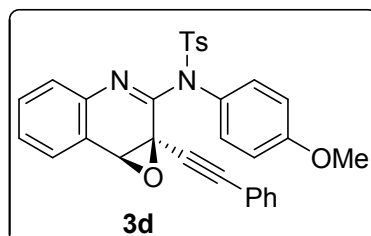

Yellow solid; (65 mg, 0.12 mmol, 84 %);  $^1\text{H}$  NMR (600 MHz,  $\text{CDCl}_3$ ):  $\delta$  7.76 (d,  $J = 8.4$  Hz, 2H), 7.56 (d,  $J = 7.2$  Hz, 1H), 7.52-7.47 (m, 2H), 7.35-7.25 (m, 10H), 6.86 (d,  $J = 9.6$  Hz, 2H), 4.62 (s, 1H), 3.80 (s, 3H), 2.40 (s, 3H);  $^{13}\text{C}$  NMR (150 MHz,  $\text{CDCl}_3$ ):  $\delta$  151.9, 151.5, 143.9, 141.1, 135.9, 131.9, 131.8, 130.5, 129.8, 129.3, 129.2, 129.0, 128.6, 128.5, 128.3, 127.3, 123.2, 121.3, 113.8, 86.4, 83.4, 65.5, 55.4, 53.2, 21.6; ESI-MS ( $\text{M}+\text{Na}$ ) calcd. for  $\text{C}_{31}\text{H}_{24}\text{N}_2\text{NaO}_4\text{S}$ : 543.1354; Found: 543.1368

**Spectral data for 4-methyl-*N*-((1*aR*,7*bS*)-1*a*-(phenylethynyl)-1*a*,7*b*-dihydrooxireno[2,3-*c*]quinolin-2-yl)-*N*-(*p*-tolyl)benzenesulfonamide (3e)**

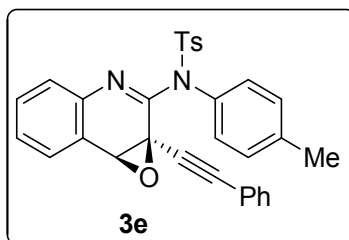

White solid; (59 mg, 0.11 mmol, 76 %);  $^1\text{H NMR}$  (600 MHz,  $\text{CDCl}_3$ ):  $\delta$  7.75 (d,  $J = 8.4$  Hz, 2H), 7.57 (d,  $J = 7.2$  Hz, 1H), 7.52-7.47 (m, 2H), 7.36-7.29 (m, 6H), 7.25 (t,  $J = 9.0$ , 4H), 7.16 (d,  $J = 7.6$  Hz, 2H), 4.63 (s, 1H), 2.40 (s, 3H), 2.38 (s, 3H);  $^{13}\text{C NMR}$  (150 MHz,  $\text{CDCl}_3$ ):  $\delta$  151.6, 143.9, 141.0, 138.9, 136.0, 133.9, 131.9, 130.5, 130.3, 129.7, 129.3, 129.2, 129.1, 128.6, 128.3, 127.3, 123.2, 121.3, 86.4, 83.2, 65.5, 53.2, 21.6, 21.3, one 'C' merge with others; ESI-MS ( $\text{M}+\text{Na}$ ) calcd. for  $\text{C}_{31}\text{H}_{24}\text{N}_2\text{NaO}_3\text{S}$ : 527.1508; Found: 527.1351

**Spectral data for *N*-(3-chlorophenyl)-4-methyl-*N*-((1*aR*,7*bS*)-1*a*-(phenylethynyl)-1*a*,7*b*-dihydrooxireno[2,3-*c*]quinolin-2-yl)benzenesulfonamide (3f)**

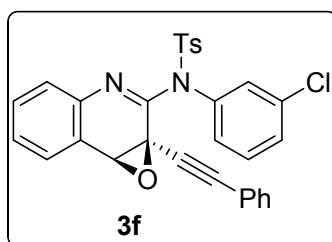

Yellow solid; (62 mg, 0.11 mmol, 80 %);  $^1\text{H NMR}$  (600 MHz,  $\text{CDCl}_3$ ):  $\delta$  7.75 (d,  $J = 8.4$  Hz, 2H), 7.59 (d,  $J = 7.2$  Hz, 1H), 7.54-7.49 (m, 3H), 7.36-7.25 (m, 10H), 7.16 (td,  $J = 7.8, 1.2$  Hz, 1H), 4.66 (s, 1H), 2.41 (s, 3H);  $^{13}\text{C NMR}$  (150 MHz,  $\text{CDCl}_3$ ):  $\delta$  151.3, 144.3, 140.8, 137.9, 135.8, 134.3, 132.0, 130.8, 130.6, 129.6, 129.5, 129.3, 129.0, 128.8, 128.7, 128.4, 128.0, 127.7, 123.4, 120.9, 86.9, 82.8, 65.6, 53.3, 21.6, one 'C' merge with others; ESI-MS ( $\text{M}+\text{Na}$ ) calcd. for  $\text{C}_{30}\text{H}_{21}\text{ClN}_2\text{NaO}_3\text{S}$ : 547.0859; Found: 547.0858

**Spectral data for *N*-(3-bromophenyl)-4-methyl-*N*-((1*aR*,7*bS*)-1*a*-(phenylethynyl)-1*a*,7*b*-dihydrooxireno[2,3-*c*]quinolin-2-yl)benzenesulfonamide (3g)**

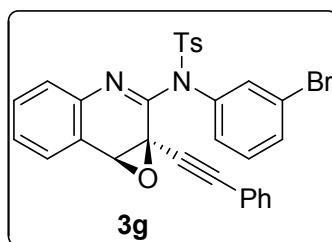

Yellow solid; (59 mg, 0.10 mmol, 78 %);  $^1\text{H NMR}$  (600 MHz,  $\text{CDCl}_3$ ):  $\delta$  7.72 (d,  $J = 8.4$  Hz, 2H), 7.67 (s, 1H), 7.56 (d,  $J = 7.8$  Hz, 1H), 7.51-7.46 (m, 3H), 7.35-7.28 (m,

6H), 7.24-7.16(m, 4H), 4.63 (s, 1H), 2.38 (s, 3H);  $^{13}\text{C}$  NMR (150 MHz,  $\text{CDCl}_3$ ):  $\delta$  151.3, 144.3, 140.8, 138.0, 135.8, 133.7, 132.1, 131.9, 130.6, 129.8, 129.6, 129.3, 128.8, 128.7, 128.4, 128.3, 127.7, 123.4, 122.1, 120.9, 87.0, 82.6, 65.5, 53.3, 21.6, one 'C' merge with others; ESI-MS ( $\text{M}+\text{Na}$ ) calcd. for  $\text{C}_{30}\text{H}_{21}\text{BrN}_2\text{NaO}_3\text{S}$ : 591.0354; Found: 591.036.

**Spectral data for *N*-(3-methoxyphenyl)-4-methyl-*N*-((1*R*,7*bS*)-1*a*-(phenylethynyl)-1*a*,7*b*-dihydrooxireno[2,3-*c*]quinolin-2-yl)benzenesulfonamide (3h)**

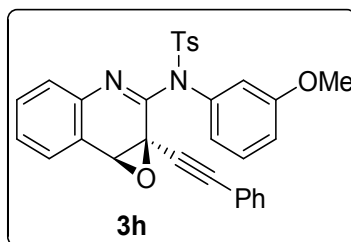

White solid; (55 mg, 0.10 mmol, 71 %);  $^1\text{H}$  NMR (600 MHz,  $\text{CDCl}_3$ ):  $\delta$  7.73 (d,  $J = 8.4$  Hz, 2H), 7.55 (d,  $J = 7.8$  Hz, 1H), 7.49-7.45 (m, 2H), 7.33-7.25 (m, 6H), 7.21 (d,  $J = 8.4$  Hz, 3H), 6.97 (t,  $J = 8.4$  Hz, 1H), 6.92 (dd,  $J = 8.4, 1.8$  Hz, 1H), 6.81 (td,  $J = 7.8, 1.2$  Hz, 1H), 4.61 (s, 1H), 3.54 (s, 3H), 2.37 (s, 3H);  $^{13}\text{C}$  NMR (150 MHz,  $\text{CDCl}_3$ ):  $\delta$  159.7, 151.6, 144.0, 140.9, 137.8, 136.1, 132.0, 130.5, 129.7, 129.3, 129.2, 129.0, 128.6, 128.3, 127.4, 123.3, 122.2, 121.3, 115.7, 115.6, 86.5, 83.1, 65.7, 55.2, 53.4, 21.6, one 'C' merge with others; ESI-MS ( $\text{M}+\text{Na}$ ) calcd. for  $\text{C}_{31}\text{H}_{24}\text{N}_2\text{NaO}_4\text{S}$ : 543.1354; Found: 543.1356.

**Spectral data for *N*-phenyl-*N*-((1*R*,7*bS*)-1*a*-(phenylethynyl)-1*a*,7*b*-dihydrooxireno[2,3-*c*]quinolin-2-yl)benzenesulfonamide (3n)**

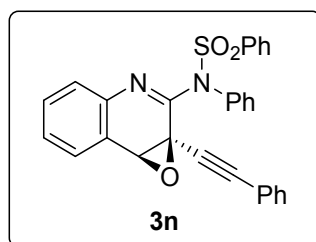

White solid; (100.7 mg, 0.21 mmol, 75%);  $^1\text{H}$  NMR (400 MHz,  $\text{CDCl}_3$ ):  $\delta$  7.86 (d,  $J = 7.6$  Hz, 2H), 7.59-7.54 (m, 2H), 7.52-7.49 (m, 2H), 7.45 (t,  $J = 8.0$  Hz, 3H), 7.47-7.39 (m, 5H), 7.34-7.31 (m, 5H), 4.65 (s, 1H);  $^{13}\text{C}$  NMR (100 MHz,  $\text{CDCl}_3$ ):  $\delta$  151.5, 140.9, 139.1, 136.6, 133.1, 132.0, 130.5, 130.3, 129.5, 129.3, 129.2, 128.9, 128.7, 128.6, 128.3, 128.0, 127.5, 123.3, 121.2, 86.6, 83.1, 65.5, 53.3; ESI-MS ( $\text{M}+\text{Na}$ ) calcd. for  $\text{C}_{29}\text{H}_{21}\text{N}_2\text{NaO}_3\text{S}$ : 499.1092; Found: 499.1092.

**Spectral data for *N*-phenyl-*N*-((1*R*,7*bS*)-1*a*-(phenylethynyl)-1*a*,7*b*-**

**dihydrooxireno[2,3-*c*]quinolin-2-yl)methanesulfonamide (3o)**

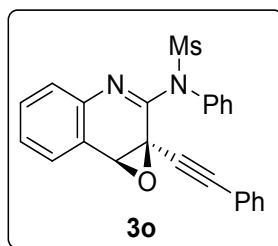

White solid; (73 mg, 0.17 mmol, 62%);  $^1\text{H NMR}$  (700 MHz,  $\text{CDCl}_3$ ):  $\delta$  7.63 (d,  $J = 7.7$  Hz, 2H), 7.60 (d,  $J = 7.7$  Hz, 1H), 7.53-7.49 (m, 3H), 7.44-7.40 (m, 3H), 7.37-7.31 (m, 2H), 7.30-7.27 (m, 4H), 4.70 (s, 3H), 3.45 (s, 3H);  $^{13}\text{C NMR}$  (175 MHz,  $\text{CDCl}_3$ ):  $\delta$  152.4, 140.7, 136.4, 131.9, 130.6, 129.7, 129.3, 129.2, 128.9, 128.9, 128.2, 127.8, 123.5, 121.1, 86.6, 82.8, 65.6, 53.5, 40.4, one 'C' merge with others; ESI-MS ( $\text{M}+\text{Na}$ ) calcd. for  $\text{C}_{24}\text{H}_{18}\text{N}_2\text{NaO}_3\text{S}$ : 437.0936; Found: 437.0927.

**Spectral data for *N*-((1aR,7bS)-1a-((4-chlorophenyl)ethynyl)-1a,7b-dihydrooxireno[2,3-*c*]quinolin-2-yl)-4-methyl-*N*-phenylbenzenesulfonamide (3p)**

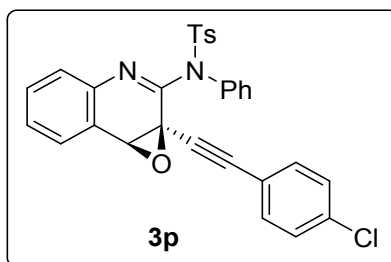

White solid; (70.8 mg, 0.13 mmol, 64%);  $^1\text{H NMR}$  (400 MHz,  $\text{CDCl}_3$ ):  $\delta$  7.73 (d,  $J = 8.4$  Hz, 2H), 7.58 (d,  $J = 7.6$  Hz, 1H), 7.53-7.48 (m, 2H), 7.40-7.36 (m, 5H), 7.34-7.27 (m, 3H), 7.25-7.21 (m, 4H), 4.64 (s, 1H), 2.40 (s, 3H);  $^{13}\text{C NMR}$  (100 MHz,  $\text{CDCl}_3$ ):  $\delta$  151.4, 144.1, 141.0, 136.7, 136.0, 135.4, 133.2, 130.6, 130.3, 129.7, 129.3, 128.8, 128.7, 128.7, 127.5, 123.2, 119.7, 85.4, 84.2, 65.5, 53.3, 21.6, two 'C' merge with others; ESI-MS ( $\text{M}+\text{H}$ ) calcd. for  $\text{C}_{30}\text{H}_{22}\text{ClN}_2\text{O}_3\text{S}$ : 525.1040; Found: 525.10558

**Spectral data for *N*-((1aR,7bS)-1a-((4-bromophenyl)ethynyl)-1a,7b-dihydrooxireno[2,3-*c*]quinolin-2-yl)-4-methyl-*N*-phenylbenzenesulfonamide (3q)**

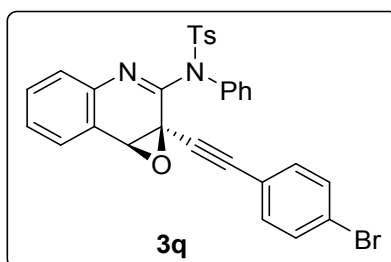

White solid; (75.4 mg, 0.13 mmol, 70%);  $^1\text{H NMR}$  (400 MHz,  $\text{CDCl}_3$ ):  $\delta$  7.72 (d,  $J = 8.4$  Hz, 2H), 7.58 (d,  $J = 8.0$  Hz, 1H), 7.53-7.49 (m, 2H), 7.48-7.43 (3, 2H), 7.40-7.29

(m, 5H), 7.25-7.23 (m, 3H), 7.17-7.14 (m, 2H), 4.63 (s, 1H), 2.40 (s, 3H);  $^{13}\text{C}$  NMR (150 MHz,  $\text{CDCl}_3$ ):  $\delta$  151.4, 144.1, 141.0, 136.8, 136.1, 133.4, 131.7, 130.6, 130.4, 129.7, 129.3, 128.8, 128.7, 128.7, 127.5, 123.7, 123.2, 120.2, 85.5, 84.4, 65.6, 53.3, 21.6, two 'C' merge with others; ESI-MS ( $\text{M}+\text{Na}$ ) calcd. for  $\text{C}_{30}\text{H}_{21}\text{BrN}_2\text{NaO}_3\text{S}$ : 591.0354; Found: 591.03652

**Spectral data for 4-methyl-*N*-phenyl-*N*-((1*aR*,7*bS*)-1*a*-((4-(trifluoromethyl)phenyl)ethynyl)-1*a*,7*b*-dihydrooxireno[2,3-*c*]quinolin-2-yl)benzenesulfonamide (3r)**

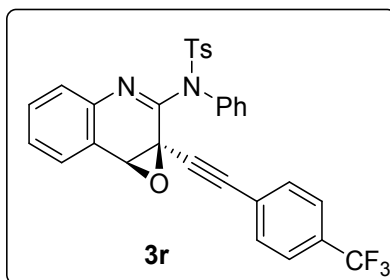

White solid; (73.4 mg, 0.13 mmol, 57%);  $^1\text{H}$  NMR (400 MHz,  $\text{CDCl}_3$ ):  $\delta$  7.72 (d,  $J$  = 8.4 Hz, 2H), 7.60-7.56 (m, 3H), 7.52-7.50 (m, 2H), 7.42-7.30 (m, 8H), 7.25 (d,  $J$  = 8.0 Hz, 2H), 4.67 (s, 1H), 2.40 (s, 3H);  $^{13}\text{C}$  NMR (100 MHz,  $\text{CDCl}_3$ ):  $\delta$  151.1, 144.1, 140.9, 136.7, 135.9, 132.2, 131.0, 130.6, 130.3, 129.6, 129.4, 129.3, 129.2, 128.8, 128.7, 128.7, 128.2, 127.9, 127.6, 125.3, 125.2, 125.0, 123.6, 123.0, 122.3, 85.5, 84.9, 65.5, 53.1, 21.6; ESI-MS ( $\text{M}+\text{Na}$ ) calcd. for  $\text{C}_{31}\text{H}_{21}\text{F}_3\text{N}_2\text{NaO}_3\text{S}$ : 581.1123; Found: 581.11064

**Spectral data for 4-methyl-*N*-phenyl-*N*-((1*aR*,7*bS*)-1*a*-(*p*-tolylethynyl)-1*a*,7*b*-dihydrooxireno[2,3-*c*]quinolin-2-yl)benzenesulfonamide (3s)**

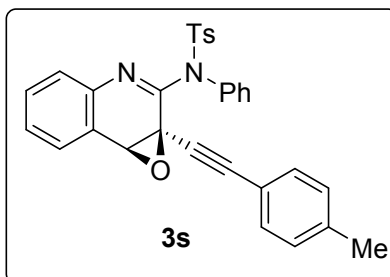

White solid; (34.9 mg, 0.07 mmol, 27%);  $^1\text{H}$  NMR (400 MHz,  $\text{CDCl}_3$ ):  $\delta$  7.74 (d,  $J$  = 8.4 Hz, 2H), 7.57 (d,  $J$  = 7.2 Hz, 1H), 7.53-7.47 (m, 2H), 7.39-7.38 (m, 5H), 7.31 (td,  $J$  = 7.2, 2.0 Hz, 1H), 7.25-7.19 (m, 4H), 7.11 (d,  $J$  = 8.0 Hz, 2H), 4.62 (s, 1H), 2.40 (s, 3H), 2.35 (s, 3H);  $^{13}\text{C}$  NMR (100 MHz,  $\text{CDCl}_3$ ):  $\delta$  151.7, 144.0, 141.0, 139.4, 136.7, 136.1, 131.9, 130.5, 129.7, 129.3, 129.0, 128.7, 128.6, 127.4, 123.4, 118.2, 86.8, 82.5, 65.5, 53.3, 21.6, 21.5, two 'C' merge with others; ESI-MS ( $\text{M}+\text{Na}$ ) calcd. for  $\text{C}_{31}\text{H}_{24}\text{N}_2\text{NaO}_3\text{S}$ : 527.1405; Found: 527.13978.

**Spectral data for *N*-((1*aR*,7*bS*)-1*a*-((3-chlorophenyl)ethynyl)-1*a*,7*b*-dihydrooxireno[2,3-*c*]quinolin-2-yl)-4-methyl-*N*-phenylbenzenesulfonamide (3u)**

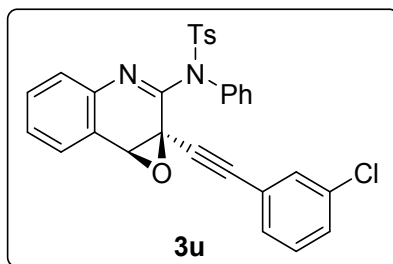

White solid; (70.5 mg, 0.13 mmol, 65%);  $^1\text{H}$  NMR (400 MHz,  $\text{CDCl}_3$ ):  $\delta$  7.74 (d,  $J$  = 5.6 Hz, 2H), 7.57 (d,  $J$  = 5.2 Hz, 1H), 7.53-7.49 (m, 2H), 7.43-7.37 (m, 5H), 7.36-7.31 (m, 2H), 7.28-7.19 (m, 5H), 4.64 (s, 1H), 2.39 (s, 3H);  $^{13}\text{C}$  NMR (150 MHz,  $\text{CDCl}_3$ ):  $\delta$  151.2, 144.1, 140.9, 136.7, 135.9, 134.1, 131.8, 130.6, 130.3, 130.1, 129.7, 129.6, 129.5, 129.3, 128.8, 128.7, 128.7, 127.5, 123.1, 122.9, 84.9, 84.3, 65.5, 53.2, 21.6, one 'C' merge with others; ESI-MS ( $\text{M}+\text{Na}$ ) calcd. for  $\text{C}_{30}\text{H}_{21}\text{ClN}_2\text{O}_3\text{S}$ : 547.0859; Found: 547.08523

**Spectral data for *N*-(7-formyl-3-(phenylethynyl)-1H-indol-2-yl)-4-methyl-*N*-phenylbenzenesulfonamide (4a)**

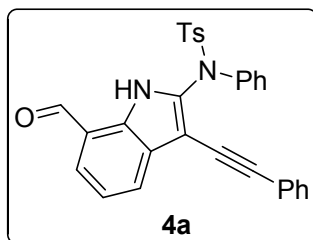

Yellow solid; (18 mg, 0.03 mmol, 17 %);  $^1\text{H}$  NMR (400 MHz,  $\text{CDCl}_3$ ):  $\delta$  10.47 (s, 1H), 10.12 (s, 1H), 7.95 (d,  $J$  = 8.0 Hz, 1H), 7.72 (d,  $J$  = 8.0 Hz, 3H), 7.54 (dt,  $J$  = 8.4, 1.2 Hz, 2H), 7.36-7.29 (m, 7H), 7.24-7.19 (m, 2H), 7.17 (d,  $J$  = 8.0 Hz, 2H), 2.21 (s, 3H);  $^{13}\text{C}$  NMR (150 MHz,  $\text{CDCl}_3$ ):  $\delta$  192.9, 144.4, 139.9, 137.2, 136.7, 131.7, 130.5, 130.3, 129.7, 129.3, 129.0, 128.4, 128.3, 128.2, 128.1, 128.0, 127.2, 123.4, 120.7, 96.2, 94.7, 80.6, 21.2, one 'C' merge with others; ESI-MS ( $\text{M}+\text{Na}$ ) calcd. for  $\text{C}_{30}\text{H}_{22}\text{N}_2\text{NaO}_3\text{S}$ : 513.1249; Found: 513.12725.

**Spectral data for *N*-(7-formyl-3-(phenylethynyl)-1H-indol-2-yl)-4-methyl-*N*-(*p*-tolyl)benzenesulfonamide (4e)**

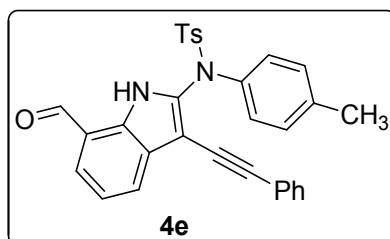

Yellow solid; (8 mg, 0.015 mmol, 10 %);  $^1\text{H}$  NMR (600 MHz,  $\text{CDCl}_3$ ):  $\delta$  10.44 (s, 1H),

10.11 (s, 1H), 7.93 (d,  $J = 7.8$  Hz, 1H), 7.71 (d,  $J = 8.4$  Hz, 3H), 7.41 (d,  $J = 8.4$  Hz, 2H), 7.32-7.29 (m, 4H), 7.21-7.20 (m, 2H), 7.17 (d,  $J = 7.8$  Hz, 2H), 7.12 (d,  $J = 7.8$  Hz, 2H), 2.29 (s, 3H), 2.22 (s, 3H);  $^{13}\text{C}$  NMR (150 MHz,  $\text{CDCl}_3$ ):  $\delta$  192.9, 144.3, 138.6, 137.4, 137.1, 136.6, 131.1, 130.4, 130.2, 129.9, 129.7, 129.5, 129.0, 128.5, 128.2, 128.1, 127.9, 127.1, 123.4, 120.6, 95.7, 94.5, 80.7, 21.4, 21.1; ESI-MS ( $\text{M}+\text{Na}$ ) calcd. for  $\text{C}_{31}\text{H}_{24}\text{N}_2\text{NaO}_3\text{S}$ : 527.1405; Found: 527.1410.

**Spectral data for *N*-benzyl-*N*-(7-formyl-3-(phenylethynyl)-1H-indol-2-yl)-4-methylbenzenesulfonamide (4i)**

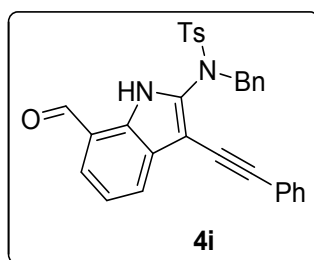

White solid; (50.3 mg, 0.10 mmol, 56%);  $^1\text{H}$  NMR (400 MHz,  $\text{CDCl}_3$ ):  $\delta$  10.14 (s, 1H), 10.01 (s, 1H), 7.90 (d,  $J = 8.0$  Hz, 1H), 7.68 (d,  $J = 8.0$  Hz, 2H), 7.61 (d,  $J = 7.2$  Hz, 1H), 7.38-7.32 (m, 5H), 7.28-7.15 (m, 8H), 5.07 (s, 2H), 2.16 (s, 3H);  $^{13}\text{C}$  NMR (150 MHz,  $\text{CDCl}_3$ ):  $\delta$  192.5, 144.4, 136.6, 135.2, 134.7, 130.9, 130.2, 129.9, 129.8, 128.7, 128.6, 128.5, 128.2, 128.0, 128.0, 127.8, 126.6, 123.1, 120.4, 120.3, 95.8, 94.4, 80.0, 53.3, 21.2; ESI-MS ( $\text{M}+\text{Na}$ ) calcd. for  $\text{C}_{31}\text{H}_{24}\text{N}_2\text{NaO}_3\text{S}$ : 527.1405; Found: 527.14095

**Spectral data for *N*-(7-formyl-3-(phenylethynyl)-1H-indol-2-yl)-*N*,4-dimethylbenzenesulfonamide (4j)**

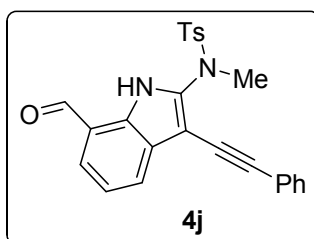

White solid; (60.6 mg, 0.14 mmol, 65%);  $^1\text{H}$  NMR (400 MHz,  $\text{CDCl}_3$ ):  $\delta$  10.34 (s, 1H), 10.12 (s, 1H), 7.92 (d,  $J = 8.0$  Hz, 1H), 7.71 (d,  $J = 7.2$  Hz, 1H), 7.61 (d,  $J = 8.4$  Hz, 2H), 7.34-7.26 (m, 4H), 7.18-7.12 (m, 4H), 3.49 (s, 3H), 2.15 (s, 3H);  $^{13}\text{C}$  NMR (100 MHz,  $\text{CDCl}_3$ ):  $\delta$  192.7, 144.5, 138.8, 133.3, 130.8, 130.0, 129.9, 129.7, 128.8, 128.1, 127.9, 127.9, 126.6, 123.1, 120.5, 95.0, 93.0, 79.8, 37.9, 21.3, one 'C' merge with others; ESI-MS ( $\text{M}+\text{Na}$ ) calcd. for  $\text{C}_{25}\text{H}_{20}\text{N}_2\text{NaO}_3\text{S}$ : 451.1092; Found: 451.10852

**Spectral data for *N*-butyl-*N*-(7-formyl-3-(phenylethynyl)-1H-indol-2-yl)-4-methylbenzenesulfonamide (4k)**

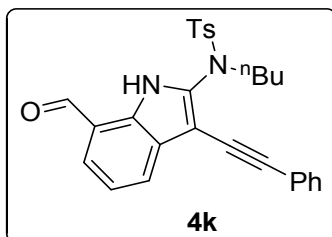

White solid; ( 70.6 mg, 0.15 mmol, 67%);  $^1\text{H NMR}$  (400 MHz,  $\text{CDCl}_3$ ):  $\delta$  10.27 (s, 1H), 10.13 (s, 1H), 7.95 (d,  $J = 8.0$  Hz, 1H), 7.72 (d,  $J = 7.2$  Hz, 1H), 7.62 (d,  $J = 8.0$  Hz, 2H), 7.35-7.27 (m, 4H), 7.24-7.13 (m, 4H), 3.87 (t,  $J = 6.8$  Hz, 2H), 2.12 (s, 3H), 1.56-1.49 (m, 2H), 1.39-1.33 (m, 2H), 0.85 (t,  $J = 7.2$  Hz, 3H);  $^{13}\text{C NMR}$  (100 MHz,  $\text{CDCl}_3$ ):  $\delta$  192.8, 144.2, 136.9, 134.7, 130.8, 130.3, 130.0, 129.7, 128.8, 128.1, 127.9, 127.7, 126.7, 123.1, 120.5, 120.4, 95.2, 94.2, 79.7, 49.7, 30.6, 21.2, 19.6, 13.6; ESI-MS ( $\text{M}+\text{Na}$ ) calcd. for  $\text{C}_{28}\text{H}_{26}\text{N}_2\text{NaO}_3\text{S}$ : 493.1562; Found: 493.15637.

**Spectral data for *N*-cyclopropyl-*N*-(7-formyl-3-(phenylethynyl)-1*H*-indol-2-yl)-4-methylbenzenesulfonamide (4l)**

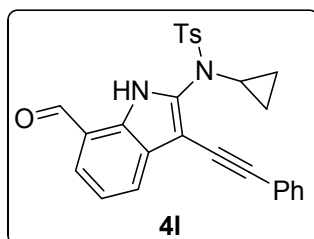

Yellow solid; (49 mg, 0.11 mmol, 61 %);  $^1\text{H NMR}$  (600 MHz,  $\text{CDCl}_3$ ):  $\delta$  10.14 (s, 1H), 10.11 (s, 1H), 7.95 (d,  $J = 7.8$  Hz, 1H), 7.71 (d,  $J = 7.2$  Hz, 3H), 7.35 (t,  $J = 7.8$  Hz, 1H), 7.26 (t,  $J = 8.4$  Hz, 3H), 7.19 (d,  $J = 7.8$  Hz, 2H), 7.11-7.10 (m, 2H), 3.17-3.14 (m, 1H), 2.17 (s, 3H), 0.95 (d,  $J = 7.2$  Hz, 2H), 0.84 (d,  $J = 6.6$  Hz, 2H);  $^{13}\text{C NMR}$  (150 MHz,  $\text{CDCl}_3$ ):  $\delta$  192.8, 144.5, 139.1, 133.9, 130.9, 130.2, 129.9, 129.7, 128.9, 128.3, 128.1, 127.9, 126.8, 123.3, 120.5, 120.4, 94.1, 93.9, 80.3, 32.0, 21.4, 8.4 ; ESI-MS ( $\text{M}+\text{Na}$ ) calcd. for  $\text{C}_{27}\text{H}_{22}\text{N}_2\text{NaO}_3\text{S}$ : 477.1249; Found: 477.1237.

**Spectral data for *N*-(7-formyl-3-(phenylethynyl)-1*H*-indol-2-yl)-*N*-isopropyl-4-methylbenzenesulfonamide (4m)**

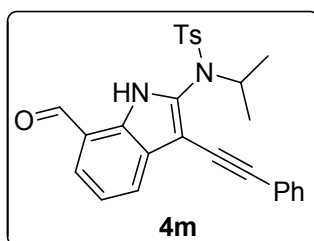

Yellow solid; (46mg, 0.10 mmol, 57 %);  $^1\text{H NMR}$  (600 MHz,  $\text{CDCl}_3$ ):  $\delta$  10.12 (s, 1H), 10.03 (s, 1H), 8.01 (d,  $J = 7.8$  Hz, 1H), 7.78 (d,  $J = 8.4$  Hz, 2H), 7.74 (dd,  $J = 7.8, 1.8$



Hz, 1H), 7.35 (t,  $J = 7.8$  Hz, 1H), 7.30-7.28 (m, 3H), 7.22-7.20 (m, 2H), 7.12 (d,  $J = 7.8$  Hz, 2H), 4.66-4.59 (m, 1H), 2.16 (s, 3H), 1.26 (d,  $J = 7.2$  Hz, 6H);  $^{13}\text{C}$  NMR (150 MHz,  $\text{CDCl}_3$ ):  $\delta$  192.9, 143.7, 137.7, 133.0, 131.1, 130.8, 130.5, 129.6, 128.8, 128.2, 127.9, 127.7, 127.4, 123.4, 120.6, 120.5, 99.8, 93.9, 81.3, 54.2, 22.4, 21.3.; ESI-MS ( $\text{M}+\text{Na}$ ) calcd. for  $\text{C}_{27}\text{H}_{24}\text{N}_2\text{NaO}_3\text{S}$ : 479.1405; Found: 479.1413

**Spectral data for *N*-(7-formyl-3-(phenylethynyl)-1*H*-indol-2-yl)-*N*-phenylbenzenesulfonamide (4n)**

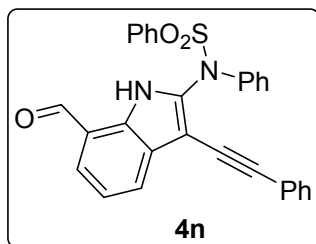

White solid; (20.2 mg, 0.04 mmol, 15%);  $^1\text{H}$  NMR (400 MHz,  $\text{CDCl}_3$ ):  $\delta$  10.61 (s, 1H), 10.14 (s, 1H), 7.96 (d,  $J = 8.0$  Hz, 1H), 7.88 (d,  $J = 7.2$  Hz, 2H), 7.72 (dd,  $J = 7.2, 0.8$  Hz, 1H), 7.55-7.53 (m, 2H), 7.48-7.45 (m, 2H), 7.42-7.38 (m, 2H), 7.35-7.27 (m, 7H), 7.24-7.21 (m, 1H);  $^{13}\text{C}$  NMR (100 MHz,  $\text{CDCl}_3$ ):  $\delta$  193.0, 139.7, 139.6, 137.0, 133.3, 131.2, 130.4, 130.4, 129.3, 129.0, 128.9, 128.3, 128.2, 128.0, 127.2, 123.0, 120.7, 96.3, 94.8, 80.5, three 'C' merge with others; ESI-MS ( $\text{M}+\text{Na}$ ) calcd. for  $\text{C}_{29}\text{H}_{20}\text{N}_2\text{NaO}_3\text{S}$ : 499.1092; Found: 499.10884

**Spectral data for *N*-(3-((4-chlorophenyl)ethynyl)-7-formyl-1*H*-indol-2-yl)-4-methyl-*N*-phenylbenzenesulfonamide (4p)**

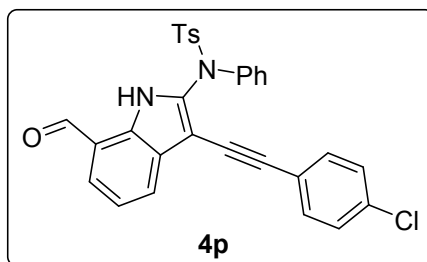

White solid; (17.2 mg, 0.03 mmol, 14%);  $^1\text{H}$  NMR (400 MHz,  $\text{CDCl}_3$ ):  $\delta$  10.46 (s, 1H), 10.12 (s, 1H), 7.92 (d,  $J = 7.6$  Hz, 1H), 7.71 (d,  $J = 8.0$  Hz, 3H), 7.48 (d,  $J = 8.4$  Hz, 2H), 7.34-7.23 (m, 6H), 7.19 (d,  $J = 8.4$ , 2H), 7.11 (d,  $J = 8.4$  Hz, 2H), 2.26 (s, 3H);  $^{13}\text{C}$  NMR (100 MHz,  $\text{CDCl}_3$ ):  $\delta$  192.9, 144.4, 139.7, 137.5, 136.6, 133.9, 132.3, 130.4, 130.3, 129.8, 129.3, 128.8, 128.5, 128.3, 128.3, 128.1, 127.1, 121.8, 120.8, 120.7, 95.6, 93.5, 81.7, 21.5; ESI-MS ( $\text{M}+\text{H}$ ) calcd. for  $\text{C}_{30}\text{H}_{22}\text{ClN}_2\text{O}_3\text{S}$ : 525.1040; Found: 525.10559

**Spectral data for *N*-(3-((4-bromophenyl)ethynyl)-7-formyl-1*H*-indol-2-yl)-4-**

**methyl-*N*-phenylbenzenesulfonamide (4q)**

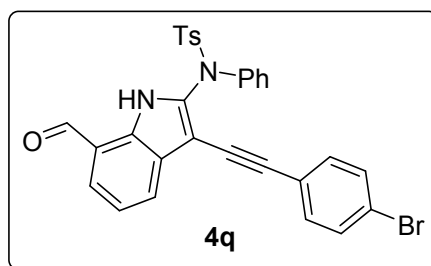

White solid; (14.8 mg, 0.03 mmol, 17%);  $^1\text{H NMR}$  (400 MHz,  $\text{CDCl}_3$ ):  $\delta$  10.48 (s, 1H), 10.11 (s, 1H), 7.92 (d,  $J = 8.0$  Hz, 1H), 7.71 (t,  $J = 7.2$  Hz, 3H), 7.49-7.47 (m, 2H), 7.42 (dt,  $J = 6.8, 1.6$  Hz, 2H), 7.34-7.28 (m, 4H), 7.19 (d,  $J = 8.0$  Hz, 2H), 7.05 (d,  $J = 6.8$  Hz, 2H), 2.26 (s, 3H);  $^{13}\text{C NMR}$  (100 MHz,  $\text{CDCl}_3$ ):  $\delta$  192.9, 144.4, 139.7, 137.5, 136.6, 132.5, 131.4, 130.4, 130.3, 129.7, 129.3, 128.8, 128.3, 128.2, 128.1, 127.0, 122.3, 122.1, 120.7, 120.7, 95.6, 93.6, 82.0, 21.5; ESI-MS ( $\text{M}+\text{Na}$ ) calcd. for  $\text{C}_{30}\text{H}_{21}\text{BrN}_2\text{NaO}_3\text{S}$ : 591.0354; Found: 591.03569

**Spectral data for *N*-(7-formyl-3-((4-(trifluoromethyl)phenyl)ethynyl)-1H-indol-2-yl)-4-methyl-*N*-phenylbenzenesulfonamide (4r)**

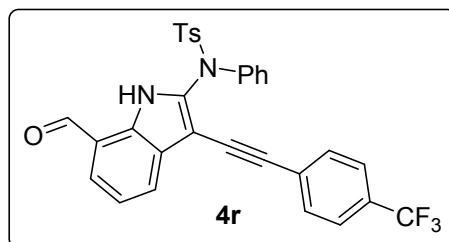

Yellow solid; (27.6 mg, 0.05 mmol, 21%);  $^1\text{H NMR}$  (400 MHz,  $\text{CDCl}_3$ ):  $\delta$  10.53 (s, 1H), 10.13 (s, 1H), 7.93 (d,  $J = 8.0$  Hz, 1H), 7.75-7.70 (m, 3H), 7.54 (d,  $J = 8.0$  Hz, 2H), 7.48 (dd,  $J = 8.0, 1.6$  Hz, 2H), 7.36-7.27 (m, 6H), 7.19 (d,  $J = 8.0$  Hz, 2H), 2.24 (s, 3H);  $^{13}\text{C NMR}$  (100 MHz,  $\text{CDCl}_3$ ):  $\delta$  193.0, 144.0, 139.7, 138.0, 136.7, 131.2, 130.3, 129.7, 129.3, 128.8, 128.4, 128.2, 128.1, 127.2, 126.9, 125.1, 120.9, 120.7, 95.1, 93.3, 83.5, 21.4; ESI-MS ( $\text{M}+\text{Na}$ ) calcd. for  $\text{C}_{31}\text{H}_{21}\text{F}_3\text{N}_2\text{NaO}_3\text{S}$ : 581.1123; Found: 581.11242

**Spectral data for *N*-(7-formyl-3-(*p*-tolylethynyl)-1H-indol-2-yl)-4-methyl-*N*-phenylbenzenesulfonamide (4s)**

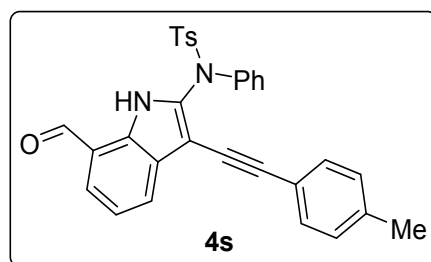

Yellow oil; (23.3 mg, 0.05 mmol, 18%);  $^1\text{H NMR}$  (400 MHz,  $\text{CDCl}_3$ ):  $\delta$  10.41 (s, 1H),

10.11 (s, 1H), 7.95 (d,  $J = 8.0$  Hz, 1H), 7.71 (d,  $J = 8.4$  Hz, 3H), 7.54-7.52 (m, 2H), 7.34-7.27 (m, 4H), 7.17 (d,  $J = 8.0$  Hz, 2H), 7.10 (s, 4H), 2.36 (s, 3H), 2.24 (s, 3H);  $^{13}\text{C}$  NMR (100 MHz,  $\text{CDCl}_3$ ):  $\delta$  192.9, 144.3, 139.8, 138.1, 137.0, 136.6, 131.1, 130.4, 130.3, 129.7, 129.2, 128.9, 128.4, 128.2, 128.1, 127.2, 120.6, 120.5, 120.2, 96.5, 94.8, 79.9, 21.5, 21.4; ESI-MS ( $\text{M}+\text{Na}$ ) calcd. for  $\text{C}_{31}\text{H}_{24}\text{N}_2\text{NaO}_3\text{S}$ : 527.1405; Found: 527.13929

**Spectral data for *N*-(7-formyl-3-(*p*-tolylethynyl)-1H-indol-2-yl)-4-methyl-*N*-phenylbenzenesulfonamide (4t)**

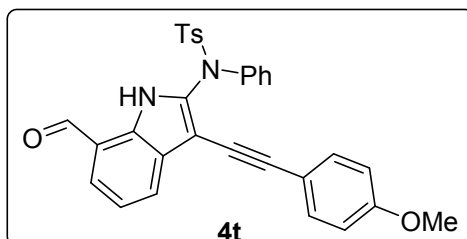

Yellow oil; (18.1 mg, 0.03 mmol, 18%);  $^1\text{H}$  NMR (400 MHz,  $\text{CDCl}_3$ ):  $\delta$  10.45 (s, 1H), 10.11 (s, 1H), 7.94 (d,  $J = 8.0$  Hz, 1H), 7.72 (t,  $J = 8.0$  Hz, 3H), 7.53 (dd,  $J = 8.4, 1.2$  Hz, 2H), 7.34-7.27 (m, 4H), 7.18-7.13 (m, 4H), 6.83 (d,  $J = 8.8$  Hz, 2H), 3.82 (s, 3H), 2.25 (s, 3H);  $^{13}\text{C}$  NMR (100 MHz,  $\text{CDCl}_3$ ):  $\delta$  192.9, 159.4, 144.3, 139.9, 136.8, 136.7, 132.6, 130.4, 130.3, 129.7, 129.2, 128.9, 128.3, 128.2, 128.1, 127.3, 120.6, 120.5, 115.5, 113.8, 96.6, 94.5, 79.1, 55.3, 21.5; ESI-MS ( $\text{M}+\text{Na}$ ) calcd. for  $\text{C}_{31}\text{H}_{24}\text{N}_2\text{NaO}_4\text{S}$ : 543.1355; Found: 543.13432

**Spectral data for *N*-(3-((3-chlorophenyl)ethynyl)-7-formyl-1H-indol-2-yl)-4-methyl-*N*-phenylbenzenesulfonamide (4u)**

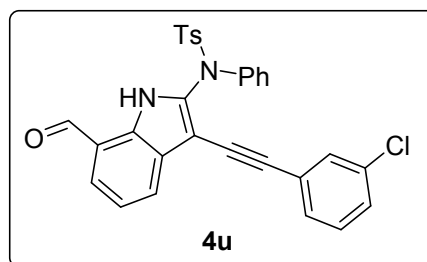

Yellow oil; (15.1 mg, 0.03 mmol, 14%);  $^1\text{H}$  NMR (600 MHz,  $\text{CDCl}_3$ ):  $\delta$  10.59 (s, 1H), 10.13 (s, 1H), 7.92 (d,  $J = 7.8$  Hz, 1H), 7.72 (d,  $J = 8.4$  Hz, 3H), 7.51 (d,  $J = 7.8$  Hz, 2H), 7.35-7.28 (m, 4H), 7.26 (d,  $J = 7.8$  Hz, 1H), 7.22-7.12 (m, 3H), 7.09 (d,  $J = 7.2$  Hz, 2H), 2.27 (s, 3H);  $^{13}\text{C}$  NMR (150 MHz,  $\text{CDCl}_3$ ):  $\delta$  192.9, 144.5, 139.7, 137.7, 136.7, 134.0, 130.9, 130.4, 130.3, 129.8, 129.4, 129.3, 129.2, 128.9, 128.4, 128.3, 128.1, 128.1, 127.0, 125.0, 120.8, 120.7, 95.4, 93.2, 82.1, 21.4; ESI-MS ( $\text{M}+\text{Na}$ ) calcd. for  $\text{C}_{30}\text{H}_{21}\text{ClN}_2\text{NaO}_3\text{S}$ : 547.0859; Found: 547.08432

**Spectral data for *N*-(7-formyl-3-(thiophen-2-ylethynyl)-1H-indol-2-yl)-4-methyl-**

### *N*-phenylbenzenesulfonamide (4v)

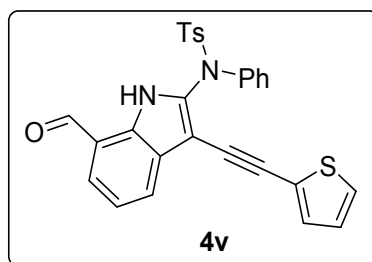

Yellow oil; (13.1 mg, 0.026 mmol, 18%);  $^1\text{H}$  NMR (400 MHz,  $\text{CDCl}_3$ ):  $\delta$  10.45 (s, 1H), 10.11 (s, 1H), 7.91 (d,  $J = 7.6$  Hz, 1H), 7.71 (t,  $J = 8.0$  Hz, 3H), 7.46 (d,  $J = 7.6$  Hz, 2H), 7.34-7.29 (m, 4H), 7.25-7.20 (m, 3H), 7.00-6.95 (m, 2H), 2.29 (s, 3H);  $^{13}\text{C}$  NMR (100 MHz,  $\text{CDCl}_3$ ):  $\delta$  192.9, 144.5, 139.6, 137.5, 136.5, 131.4, 130.3, 130.2, 129.7, 129.3, 128.7, 128.5, 128.4, 128.0, 127.1, 126.9, 123.4, 120.7, 120.6, 95.5, 87.6, 84.3, 21.5; ESI-MS ( $\text{M}+\text{Na}$ ) calcd. for  $\text{C}_{28}\text{H}_{20}\text{N}_2\text{NaO}_3\text{S}_2$ : 519.0813; Found: 519.08035.

### Spectral data for 4-methyl-*N*-phenyl-*N*-(2-phenylfuro[3,2-*c*]quinolin-4-yl)benzenesulfonamide (5a)

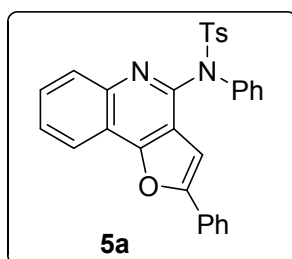

White solid; (28.0 mg, 0.06 mmol, 40%);  $^1\text{H}$  NMR (600 MHz,  $\text{CDCl}_3$ ):  $\delta$  8.22 (dd,  $J = 9.0, 0.6$  Hz, 1H), 8.00 (d,  $J = 8.4$  Hz, 1H), 7.96 (d,  $J = 8.4$  Hz, 2H), 7.70 (d,  $J = 7.8$  Hz, 2H), 7.64 (dt,  $J = 7.2, 1.2$  Hz, 1H), 7.56-7.54 (m, 1H), 7.48-7.46 (m, 2H), 7.41-7.38 (m, 5H), 7.33-7.30 (m, 3H), 6.29 (s, 1H), 2.43 (s, 3H);  $^{13}\text{C}$  NMR (150 MHz,  $\text{CDCl}_3$ ):  $\delta$  155.9, 155.7, 147.5, 143.9, 143.7, 139.6, 137.2, 129.9, 129.7, 129.5, 129.2, 128.9, 128.8, 128.8, 128.7, 128.5, 128.5, 126.3, 124.8, 119.8, 117.6, 116.1, 100.2, 21.6; ESI-MS ( $\text{M}+\text{H}$ ) calcd. for  $\text{C}_{30}\text{H}_{23}\text{N}_2\text{O}_3\text{S}$ : 491.1429; Found: 491.14416

### Spectral data for *N*-(2-(4-methoxyphenyl)furo[3,2-*c*]quinolin-4-yl)-4-methyl-*N*-phenylbenzenesulfonamide (5t)

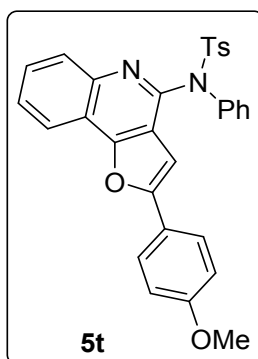

Brown oil; (36.2 mg, 0.07 mmol, 36%);  $^1\text{H}$  NMR (400 MHz,  $\text{CDCl}_3$ ):  $\delta$  8.20 (d,  $J = 8.0$  Hz, 1H), 7.99 (d,  $J = 8.4$  Hz, 1H), 7.95 (d,  $J = 8.4$  Hz, 2H), 7.63 (t,  $J = 8.4$  Hz, 3H), 7.54 (t,  $J = 7.6$  Hz, 1H), 7.45 (dd,  $J = 6.4, 3.2$  Hz, 2H), 7.38-7.37 (m, 3H), 7.30 (d,  $J = 8.0$  Hz, 2H), 6.92 (d,  $J = 8.0$  Hz, 2H), 6.15 (s, 1H), 3.82 (s, 3H), 2.43 (s, 3H);  $^{13}\text{C}$  NMR (100 MHz,  $\text{CDCl}_3$ ):  $\delta$  160.2, 156.6, 155.9, 147.4, 143.7, 143.6, 139.6, 137.1, 129.9, 129.7, 129.2, 128.8, 128.7, 128.5, 128.2, 126.4, 126.2, 122.3, 119.7, 117.9, 116.1, 114.3, 98.5, 55.4, 21.6; ESI-MS ( $\text{M}+\text{Na}$ ) calcd. for  $\text{C}_{31}\text{H}_{24}\text{N}_2\text{NaO}_4\text{S}$ : 543.1355; Found: 543.13574

**Spectral data for 4-methyl-*N*-phenyl-*N*-(2-(thiophen-2-yl)furo[3,2-*c*]quinolin-4-yl)benzenesulfonamide (5v)**

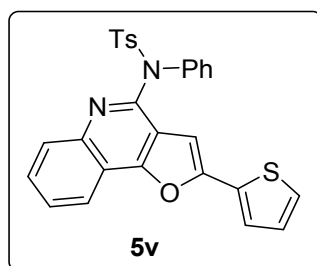

Green sticky solid; (20.7 mg, 0.04 mmol, 48%);  $^1\text{H}$  NMR (400 MHz,  $\text{CDCl}_3$ ):  $\delta$  8.19 (dd,  $J = 8.0, 1.2$  Hz, 1H), 7.99 (d,  $J = 8.4$  Hz, 1H), 7.94 (d,  $J = 8.4$  Hz, 2H), 7.66-7.62 (m, 1H), 7.54 (dt,  $J = 7.2, 1.2$  Hz, 1H), 7.46-7.43 (m, 2H), 7.39-7.37 (m, 4H), 7.32-7.29 (m, 3H), 7.07-7.05 (m, 1H), 6.12 (s, 1H), 2.43 (s, 3H);  $^{13}\text{C}$  NMR (100 MHz,  $\text{CDCl}_3$ ):  $\delta$  156.6, 151.1, 147.3, 143.9, 143.7, 139.5, 137.1, 132.1, 129.9, 129.7, 129.2, 128.8, 128.7, 128.6, 127.9, 126.4, 125.2, 119.9, 117.6, 116.1, 100.0, 21.7, one 'C' merge with others; ESI-MS ( $\text{M}+\text{Na}$ ) calcd. for  $\text{C}_{28}\text{H}_{20}\text{N}_2\text{NaO}_3\text{S}$ : 519.0813; Found: 519.08052

**Spectral data for *N*-((1*aR*,7*bS*)-5-chloro-1*a*-(phenylethynyl)-1*a*,7*b*-dihydrooxireno[2,3-*c*]quinolin-2-yl)-4-methyl-*N*-phenylbenzenesulfonamide (6b)**

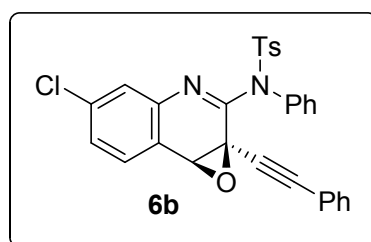

White solid; (74.5 mg, 0.14 mmol, 66%);  $^1\text{H}$  NMR (400 MHz,  $\text{CDCl}_3$ ):  $\delta$  7.71 (d,  $J = 8.0$  Hz, 2H), 7.52-7.50 (m, 2H), 7.43-7.33 (m, 6H), 7.32-7.25 (m, 7H), 4.60 (s, 1H), 2.41 (s, 3H);  $^{13}\text{C}$  NMR (100 MHz,  $\text{CDCl}_3$ ):  $\delta$  152.9, 144.2, 142.0, 136.4, 136.0, 135.7, 131.9, 130.4, 130.2, 129.5, 129.2, 128.9, 128.7, 128.7, 128.3, 127.2, 121.7, 121.0, 86.7, 82.8, 64.9, 53.2, 21.6, one 'C' merge with others; ESI-MS ( $\text{M}+\text{Na}$ ) calcd. for  $\text{C}_{30}\text{H}_{21}\text{ClN}_2\text{NaO}_3\text{S}$ : 547.0859; Found: 547.08564

**Spectral data for *N*-((1*aR*,7*bS*)-5-bromo-1*a*-(phenylethynyl)-1*a*,7*b*-**

**dihydrooxireno[2,3-*c*]quinolin-2-yl)-4-methyl-*N*-phenylbenzenesulfonamide (6c)**

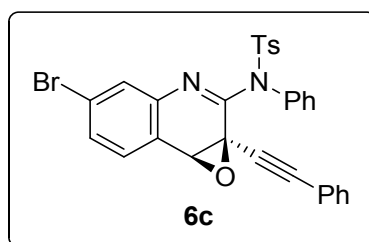

Yellow solid; (112.1 mg, 0.20 mmol, 78%);  $^1\text{H}$  NMR (400 MHz,  $\text{CDCl}_3$ ):  $\delta$  7.71 (d,  $J$  = 8.0 Hz, 2H), 7.66 (s, 1H), 7.43-7.25 (m, 14H), 4.60 (s, 1H), 2.41 (s, 3H);  $^{13}\text{C}$  NMR (100 MHz,  $\text{CDCl}_3$ ):  $\delta$  152.9, 144.2, 142.1, 136.4, 135.6, 131.9, 131.2, 130.4, 130.1, 129.5, 129.2, 128.9, 128.7, 128.6, 128.2, 124.0, 122.1, 121.0, 86.7, 82.8, 65.0, 53.2, 21.6, one 'C' merge with others; ESI-MS ( $\text{M}+\text{Na}$ ) calcd. for  $\text{C}_{30}\text{H}_{21}\text{BrN}_2\text{NaO}_3\text{S}$ : 591.0354; Found: 591.03233

**Spectral data for 4-methyl-*N*-((1*aR*,7*bS*)-5-methyl-1*a*-(phenylethynyl)-1*a*,7*b*-dihydrooxireno[2,3-*c*] quinolin-2-yl)-*N*-phenylbenzenesulfonamide (6d)**

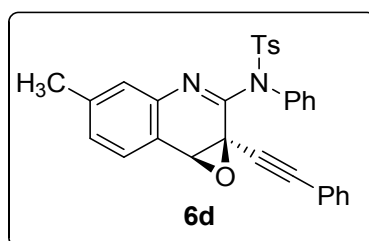

White solid; (80.3 mg, 0.16 mmol, 63%);  $^1\text{H}$  NMR (400 MHz,  $\text{CDCl}_3$ ):  $\delta$  7.74 (dd,  $J$  = 8.4, 1.6 Hz, 2H), 7.46 (d,  $J$  = 7.6 Hz, 1H), 7.40-7.34 (m, 6H), 7.33-7.29 (m, 6H), 7.26 (s, 1H), 7.14-7.12 (m, 1H), 4.62 (s, 1H), 2.43 (s, 3H), 2.40 (s, 3H);  $^{13}\text{C}$  NMR (100 MHz,  $\text{CDCl}_3$ ):  $\delta$  151.6, 143.9, 140.8, 140.6, 136.6, 135.8, 131.8, 130.3, 129.5, 129.0, 129.0, 128.6, 128.5, 128.2, 128.2, 121.2, 120.3, 86.3, 83.3, 65.3, 53.1, 21.5, 21.3, two 'C' merge with others; ESI-MS ( $\text{M}+\text{Na}$ ) calcd. for  $\text{C}_{31}\text{H}_{24}\text{N}_2\text{NaO}_3\text{S}$ : 527.1405; Found: 527.14085

**Spectral data for *N*-((1*aR*,7*bS*)-6-chloro-1*a*-(phenylethynyl)-1*a*,7*b*-dihydrooxireno[2,3-*c*] quinolin-2-yl)-4-methyl-*N*-phenylbenzenesulfonamide (6f)**

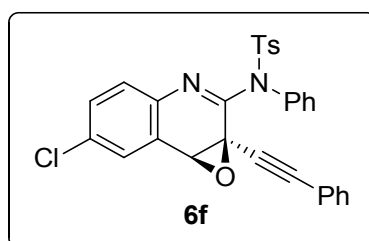

White solid; (90.0 mg, 0.17 mmol, 64%);  $^1\text{H}$  NMR (400 MHz,  $\text{CDCl}_3$ ):  $\delta$  7.71 (d,  $J$  =

8.4 Hz, 2H), 7.56 (s, 1H), 7.45-7.29 (m, 12H), 7.24 (d,  $J = 8.4$  Hz, 2H), 4.57 (s, 1H), 2.40 (s, 3H);  $^{13}\text{C}$  NMR (100 MHz,  $\text{CDCl}_3$ ):  $\delta$  151.8, 144.1, 139.5, 136.5, 135.8, 132.6, 131.9, 130.5, 130.4, 129.8, 129.6, 129.3, 129.0, 128.9, 128.7, 128.3, 124.7, 121.0, 86.7, 82.7, 64.8, 53.1, 21.6, one 'C' merge with others; ESI-MS ( $\text{M}+\text{Na}$ ) calcd. for  $\text{C}_{30}\text{H}_{21}\text{ClN}_2\text{NaO}_3\text{S}$ : 547.0859; Found: 547.08566

**Spectral data for *N*-((1*aR*,7*bS*)-6-bromo-1*a*-(phenylethynyl)-1*a*,7*b*-dihydrooxireno[2,3-*c*] quinolin-2-yl)-4-methyl-*N*-phenylbenzenesulfonamide (6g)**

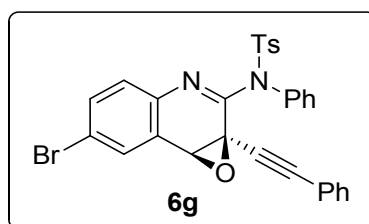

White solid; (70.5 mg, 0.12 mmol, 52%);  $^1\text{H}$  NMR (400 MHz,  $\text{CDCl}_3$ ):  $\delta$  7.74-7.69 (m, 3H), 7.59 (dd,  $J = 8.4, 2.4$  Hz, 1H), 7.41-7.38 (m, 6H), 7.35-7.30 (m, 5H), 7.24 (d,  $J = 8.0$  Hz, 2H), 4.56 (s, 1H), 2.39 (s, 3H);  $^{13}\text{C}$  NMR (100 MHz,  $\text{CDCl}_3$ ):  $\delta$  152.0, 144.1, 139.9, 136.5, 135.8, 133.5, 131.9, 130.4, 130.0, 129.6, 129.3, 128.9, 128.7, 128.3, 125.0, 121.0, 120.5, 86.7, 82.7, 64.7, 53.2, 21.6, two 'C' merge with others; ESI-MS ( $\text{M}+\text{Na}$ ) calcd. for  $\text{C}_{30}\text{H}_{21}\text{BrN}_2\text{NaO}_3\text{S}$ : 591.0354; Found: 591.03440

**Spectral data for 4-methyl-*N*-((1*aR*,7*bS*)-6-methyl-1*a*-(phenylethynyl)-1*a*,7*b*-dihydrooxireno[2,3-*c*] quinolin-2-yl)-*N*-phenylbenzenesulfonamide (6h)**

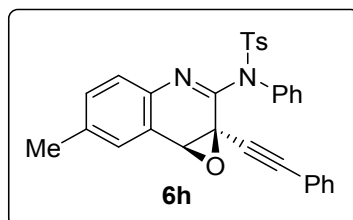

Yellow solid; (66 mg, 0.13 mmol, 63%);  $^1\text{H}$  NMR (400 MHz,  $\text{CDCl}_3$ ):  $\delta$  7.74 (d,  $J = 8.0$  Hz, 2H), 7.43-7.38 (m, 7H), 7.35-7.28 (m, 6H), 7.23 (d,  $J = 8.0$  Hz, 2H), 4.59 (s, 1H), 2.40 (s, 3H), 2.39 (s, 3H);  $^{13}\text{C}$  NMR (100 MHz,  $\text{CDCl}_3$ ):  $\delta$  150.7, 143.9, 138.7, 137.7, 136.7, 136.0, 131.9, 131.2, 130.3, 129.7, 129.6, 129.1, 128.6, 128.5, 128.2, 123.1, 121.3, 86.4, 83.3, 65.5, 53.2, 21.6, 21.2, two 'C' merge with others; ESI-MS ( $\text{M}+\text{H}$ ) calcd. for  $\text{C}_{31}\text{H}_{25}\text{N}_2\text{O}_3\text{S}$ : 505.1586; Found: 505.15971

**Spectral data for *N*-(4-chloro-7-formyl-3-(phenylethynyl)-1*H*-indol-2-yl)-4-methyl-*N*-phenylbenzenesulfonamide (7b)**

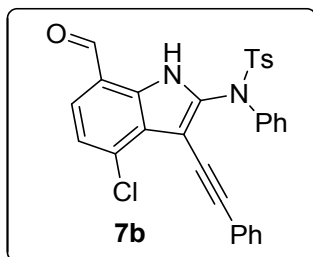

White solid; (34.3 mg, 0.06 mmol, 18%);  $^1\text{H NMR}$  (400 MHz,  $\text{CDCl}_3$ ):  $\delta$  10.49 (s, 1H), 10.06 (s, 1H), 7.89 (s, 1H), 7.69 (t,  $J = 8.4$  Hz, 3H), 7.51 (d,  $J = 7.6$  Hz, 2H), 7.35-7.30 (m, 6H), 7.20-7.17 (m, 4H), 2.22 (s, 3H);  $^{13}\text{C NMR}$  (100 MHz,  $\text{CDCl}_3$ ):  $\delta$  191.8, 144.6, 139.5, 138.3, 136.4, 131.2, 130.2, 129.8, 129.6, 129.3, 128.7, 128.5, 128.5, 128.2, 128.1, 128.1, 126.5, 123.0, 121.1, 95.5, 95.1, 79.8, 21.4, one 'C' merge with others; ESI-MS ( $\text{M}+\text{Na}$ ) calcd. for  $\text{C}_{30}\text{H}_{21}\text{ClN}_2\text{NaO}_3\text{S}$ : 547.0859; Found: 547.08325

**Spectral data for *N*-(4-bromo-7-formyl-3-(phenylethynyl)-1*H*-indol-2-yl)-4-methyl-*N*-phenylbenzenesulfonamide (7c)**

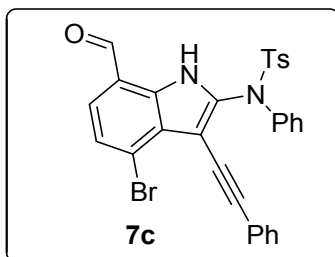

White solid; (19.5 mg, 0.03 mmol, 14%);  $^1\text{H NMR}$  (400 MHz,  $\text{CDCl}_3$ ):  $\delta$  10.52 (s, 1H), 10.06 (s, 1H), 8.05 (s, 1H), 7.80 (s, 1H), 7.70 (d,  $J = 8.0$  Hz, 2H), 7.51 (d,  $J = 7.2$  Hz, 2H), 7.33-7.30 (m, 6H), 7.24-7.17 (m, 4H), 2.22 (s, 3H);  $^{13}\text{C NMR}$  (100 MHz,  $\text{CDCl}_3$ ):  $\delta$  191.8, 144.6, 139.5, 138.2, 136.4, 132.3, 131.2, 130.7, 129.8, 129.4, 129.3, 129.0, 128.5, 128.4, 128.2, 128.1, 123.0, 121.5, 113.4, 95.4, 95.0, 79.8, 21.4, one 'C' merge with others; ESI-MS ( $\text{M}+\text{Na}$ ) calcd. for  $\text{C}_{30}\text{H}_{21}\text{BrN}_2\text{NaO}_3\text{S}$ : 519.0354; Found: 519.03578

**Spectral data for *N*-(7-formyl-4-methyl-3-(phenylethynyl)-1*H*-indol-2-yl)-4-methyl-*N*-phenylbenzenesulfonamide (7d)**

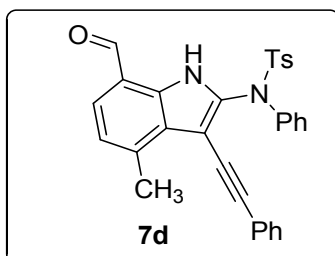

Yellow solid; (35.3 mg, 0.07 mmol, 31%);  $^1\text{H NMR}$  (400 MHz,  $\text{CDCl}_3$ ):  $\delta$  10.26 (s, 1H), 10.06 (s, 1H), 7.73 (s, 1H), 7.70 (d,  $J = 8.4$  Hz, 2H), 7.54-7.51 (m, 3H), 7.34-7.28 (m, 6H), 7.22-7.19 (m, 2H), 7.16 (d,  $J = 8.4$  Hz, 2H), 2.51 (s, 3H), 2.22 (s, 3H);  $^{13}\text{C}$



NMR (100 MHz, CDCl<sub>3</sub>):  $\delta$  192.9, 144.3, 139.9, 137.1, 136.6, 131.6, 131.1, 130.3, 129.7, 129.2, 129.1, 128.8, 128.3, 128.1, 128.1, 127.9, 127.1, 123.4, 120.5, 95.7, 94.4, 80.9, 21.4, 21.1, one 'C' merge with others; ESI-MS (M+Na) calcd. for C<sub>31</sub>H<sub>24</sub>N<sub>2</sub>NaO<sub>3</sub>S: 527.1405; Found: 527.13984

**Spectral data for *N*-(7-formyl-5-methoxy-3-(phenylethynyl)-1H-indol-2-yl)-4-methyl-*N*-phenylbenzenesulfonamide (7e)**

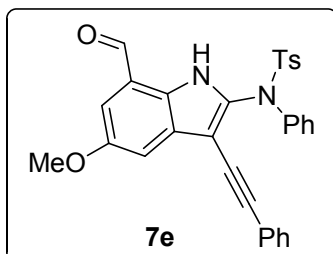

White solid; mp: (50.3 mg, 0.10 mmol, 34%); <sup>1</sup>H NMR (400 MHz, CDCl<sub>3</sub>):  $\delta$  10.36 (s, 1H), 10.06 (s, 1H), 7.73 (d, *J* = 8.0 Hz, 2H), 7.55 (d, *J* = 7.2 Hz, 2H), 7.42 (s, 1H), 7.34-7.30 (m, 7H), 7.23-7.22 (m, 2H), 7.16 (d, *J* = 7.6 Hz, 2H), 3.90 (s, 3H), 2.20 (s, 3H); <sup>13</sup>C NMR (100 MHz, CDCl<sub>3</sub>):  $\delta$  192.5, 154.6, 144.3, 139.9, 137.5, 136.7, 131.1, 129.7, 129.2, 128.3, 128.2, 128.2, 128.1, 127.9, 125.5, 123.4, 121.0, 119.0, 109.9, 95.7, 94.6, 80.8, 56.2, 21.4, one 'C' merge with others; ESI-MS (M+Na) calcd. for C<sub>31</sub>H<sub>24</sub>N<sub>2</sub>NaO<sub>4</sub>S: 543.1355; Found: 543.13478

**Spectral data for *N*-(7-formyl-5-methyl-3-(phenylethynyl)-1H-indol-2-yl)-4-methyl-*N*-phenylbenzenesulfonamide (7h)**

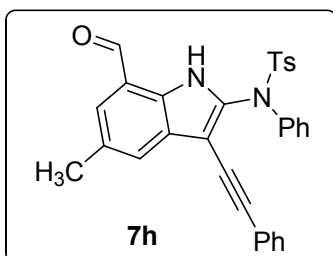

White solid; (7.5 mg, 0.01 mmol, 6%); <sup>1</sup>H NMR (400 MHz, CD<sub>2</sub>Cl<sub>2</sub>):  $\delta$  10.63 (s, 1H), 10.07 (s, 1H), 7.76 (d, *J* = 8.0 Hz, 2H), 7.64 (d, *J* = 7.6 Hz, 1H), 7.54 (d, *J* = 7.2 Hz, 2H), 7.38-7.32 (m, 6H), 7.24-7.19 (m, 4H), 7.09 (d, *J* = 7.2 Hz, 1H), 2.87 (s, 3H), 2.25 (s, 3H); <sup>13</sup>C NMR (100 MHz, CD<sub>2</sub>Cl<sub>2</sub>):  $\delta$  192.9, 145.1, 141.5, 140.5, 137.7, 137.3, 131.0, 130.9, 130.2, 129.6, 128.6, 128.4, 128.3, 126.9, 123.8, 122.7, 119.4, 96.9, 94.9, 83.3, 21.6, 19.7, three 'C' merge with others; ESI-MS (M+Na) calcd. for C<sub>31</sub>H<sub>24</sub>N<sub>2</sub>NaO<sub>3</sub>S: 527.1405; Found: 527.13885

**Spectral data for *N*-(7-acetyl-3-(phenylethynyl)-1H-indol-2-yl)-4-methyl-*N*-phenylbenzenesulfonamide (7i)**

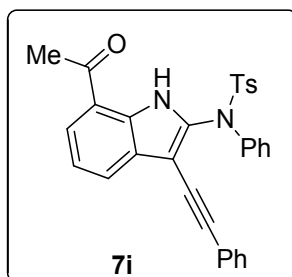

Yellow solid; (65.7 mg, 0.13 mmol, 52%);  $^1\text{H}$  NMR (400 MHz,  $\text{CDCl}_3$ ):  $\delta$  10.72 (s, 1H), 7.90 (d,  $J = 7.6$  Hz, 1H), 7.82 (d,  $J = 7.6$  Hz, 1H), 7.71 (d,  $J = 8.4$  Hz, 2H), 7.53 (dt,  $J = 7.0, 2.0$  Hz, 2H), 7.34-7.28 (m, 6H), 7.24-7.16 (m, 5H), 2.69 (s, 3H), 2.22 (s, 3H);  $^{13}\text{C}$  NMR (100 MHz,  $\text{CDCl}_3$ ):  $\delta$  199.8, 144.3, 139.8, 136.9, 136.5, 131.4, 131.0, 129.6, 129.1, 128.2, 128.0, 127.9, 127.8, 126.6, 126.2, 126.2, 123.3, 120.3, 120.1, 95.6, 94.4, 80.9, 26.4, 21.3, one 'C' merge with others; ESI-MS ( $\text{M}+\text{Na}$ ) calcd. for  $\text{C}_{31}\text{H}_{24}\text{N}_2\text{NaO}_3\text{S}$ : 527.1405; Found: 527.14237

**Spectral data for *N*-(7-methoxy-2-phenylfuro[3,2-*c*]quinolin-4-yl)-4-methyl-*N*-phenylbenzenesulfonamide (8e)**

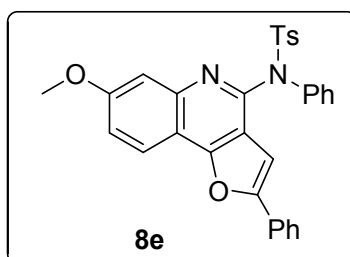

White solid; (64.3 mg, 0.12 mmol, 52%);  $^1\text{H}$  NMR (400 MHz,  $\text{CDCl}_3$ ):  $\delta$  7.89 (d,  $J = 8.0$  Hz, 3H), 7.76 (d,  $J = 7.6$  Hz, 2H), 7.49-7.46 (m, 3H), 7.42 (t,  $J = 7.6$  Hz, 2H), 7.35-7.34 (m, 4H), 7.30-7.26 (m, 3H), 6.50 (s, 1H), 3.99 (s, 3H), 2.43 (s, 3H);  $^{13}\text{C}$  NMR (100 MHz,  $\text{CDCl}_3$ ):  $\delta$  158.1, 156.4, 155.9, 145.4, 143.6, 139.7, 139.6, 137.0, 130.5, 129.5, 129.1, 129.0, 128.8, 128.8, 128.2, 124.9, 120.5, 118.7, 117.0, 100.3, 98.3, 55.8, 21.6, two 'C' merge with others; ESI-MS ( $\text{M}+\text{H}$ ) calcd. for  $\text{C}_{31}\text{H}_{25}\text{N}_2\text{O}_4\text{S}$ : 521.1535; Found: 521.15523

**Spectral data for (*E*)-3-styryl-1,2,3,4-tetrahydroquinolin-3-ol (9)**

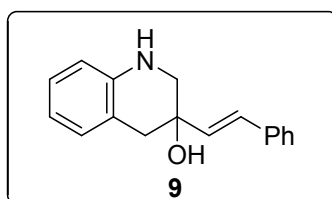

White solid; (25.6 mg, 0.10 mmol, 62%);  $^1\text{H}$  NMR (400 MHz,  $\text{CDCl}_3$ ):  $\delta$  7.41 (d,  $J = 7.2$  Hz, 2H), 7.33 (d,  $J = 7.2$  Hz, 2H), 7.25-7.22 (m, 1H), 7.06-7.00 (m, 2H), 6.82 (d,  $J = 16.0$  Hz, 1H), 6.72 (d,  $J = 7.2$  Hz, 1H), 6.61 (d,  $J = 7.8$  Hz, 1H), 6.34 (d,  $J = 16.0$  Hz,

1H), 4.01 (s, 1H), 3.27 (d,  $J = 11.2$  Hz, 1H), 3.14-3.09 (m, 2H), 2.84-2.80 (m, 2H);  $^{13}\text{C}$  NMR (100 MHz,  $\text{CDCl}_3$ ):  $\delta$  142.7, 136.7, 132.6, 130.6, 129.1, 128.6, 127.6, 127.1, 126.5, 119.1, 118.5, 114.3, 68.0, 51.6, 40.1; ESI-MS ( $\text{M}+\text{H}$ ) calcd. for  $\text{C}_{17}\text{H}_{18}\text{NO}$ : 252.1388; Found: 252.13913

**Spectral data for 4-methyl-*N*-phenyl-*N*-(3-(phenylethynyl)quinolin-2-yl)benzenesulfonamide (10)**

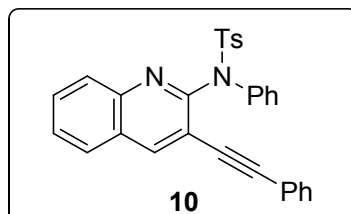

White solid; (47.5 mg, 0.10 mmol, 75%);  $^1\text{H}$  NMR (600 MHz,  $\text{CDCl}_3$ ):  $\delta$  8.29 (s, 1H), 7.95 (d,  $J = 8.4$  Hz, 1H), 7.81 (d,  $J = 10.2$  Hz, 2H), 7.74 (d,  $J = 7.8$  Hz, 1H), 7.69 (t,  $J = 7.8$  Hz, 1H), 7.55-7.51 (m, 3H), 7.48-7.47 (m, 2H), 7.38-7.36 (m, 3H), 7.26-7.23 (m, 5H), 7.24~7.23 (m, 3H), 2.42 (s, 3H);  $^{13}\text{C}$  NMR (150 MHz,  $\text{CDCl}_3$ ):  $\delta$  152.8, 145.6, 143.4, 142.1, 139.4, 136.9, 131.7, 130.3, 129.3, 129.2, 128.8, 128.7, 128.7, 128.6, 128.3, 127.7, 127.4, 127.1, 126.6, 122.7, 117.1, 95.9, 84.9, 21.6; ESI-MS ( $\text{M}+\text{H}$ ) calcd. for  $\text{C}_{30}\text{H}_{23}\text{N}_2\text{O}_2\text{S}$ : 475.1480; Found: 475.14919

**Spectral data for 4-methyl-*N*-(3-phenethylquinolin-2-yl)-*N*-phenylbenzenesulfonamide (11)**

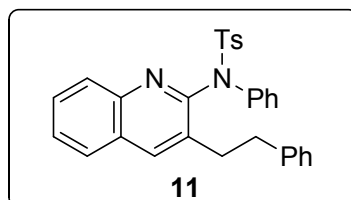

Colorless oil; (67.7 mg, 0.14 mmol, 80%);  $^1\text{H}$  NMR (400 MHz,  $\text{CDCl}_3$ ):  $\delta$  7.88 (t,  $J = 8.4$  Hz, 1H), 7.73-7.64 (m, 4H), 7.52-7.45 (m, 3H), 7.29-7.17 (m, 10H), 3.08 (t,  $J = 6.8$  Hz, 2H), 2.94 (t,  $J = 9.2$  Hz, 2H), 2.45 (s, 3H);  $^{13}\text{C}$  NMR (100 MHz,  $\text{CDCl}_3$ ):  $\delta$  152.8, 145.6, 143.4, 141.2, 139.6, 138.5, 136.4, 133.4, 129.4, 129.0, 128.9, 128.5, 128.3, 128.0, 127.4, 127.0, 126.9, 126.0, 35.8, 33.2, 21.6, three 'C' merge with others; ESI-MS ( $\text{M}+\text{Na}$ ) calcd. for  $\text{C}_{30}\text{H}_{26}\text{N}_2\text{NaO}_2\text{S}$ : 501.1613; Found: 501.16335

**Spectra data for *N*-(7-formyl-3-phenyl-1*H*-indol-2-yl)-4-methyl-*N*-phenylbenzenesulfonamide (13a)**

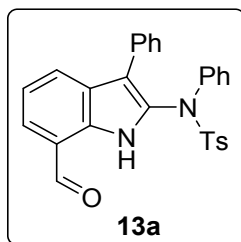

Yellow Solid; (62.8 mg, 0.13 mmol, 78%);  $^1\text{H}$  NMR (400 MHz,  $\text{CDCl}_3$ ):  $\delta$  10.17 (s, 1H), 10.11 (s, 1H), 7.86 (d,  $J = 7.7$  Hz, 1H), 7.70 (d,  $J = 7.0$  Hz, 1H), 7.58 (d,  $J = 8.4$  Hz, 2H), 7.31-7.23 (m, 8H), 7.16-7.12 (m, 3H), 7.06 (d,  $J = 6.3$  Hz, 2H), 2.43 (s, 3H);  $^{13}\text{C}$  NMR (175 MHz,  $\text{CDCl}_3$ ):  $\delta$  193.3, 144.5, 140.5, 136.3, 131.9, 131.2, 130.9, 129.9, 129.6, 129.0, 128.3, 127.8, 127.5, 127.3, 127.1, 126.8, 120.3, 120.2, 120.2, 115.5, 21.7; ESI-MS ( $\text{M}+\text{Na}$ ) calcd. for  $\text{C}_{28}\text{H}_{22}\text{N}_2\text{NaO}_3\text{S}$ : 489.1249; Found: 489.1248

**Spectra data for N-(7-formyl-3-phenyl-1H-indol-2-yl)-4-methyl-N-phenylbenzenesulfonamide (13b)**

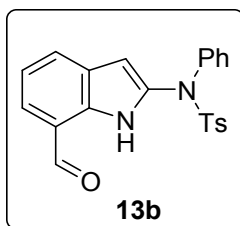

White Solid; (70.8 mg, 0.18 mmol, 82%);  $^1\text{H}$  NMR (700 MHz,  $\text{CDCl}_3$ ):  $\delta$  10.50 (s, 1H), 10.08 (s, 1H), 7.69 (d,  $J = 7.7$  Hz, 1H), 7.59 (dd,  $J = 9.1, 7.7$  Hz, 3H), 7.37-7.36 (m, 3H), 7.26-7.22 (m, 3H), 7.19 (d,  $J = 7.0$  Hz, 1H), 5.95 (d,  $J = 2.8$  Hz, 1H), 2.42 (s, 3H);  $^{13}\text{C}$  NMR (175 MHz,  $\text{CDCl}_3$ ):  $\delta$  193.0, 144.5, 139.3, 137.1, 135.4, 131.2, 129.7, 129.5, 128.8, 128.7, 128.4, 128.2, 127.9, 127.2, 120.1, 119.9, 95.5, 21.6 ESI-MS ( $\text{M}+\text{Na}$ ) calcd. for  $\text{C}_{22}\text{H}_{18}\text{N}_2\text{NaO}_3\text{S}$ : 413.0936; Found: 413.0972.

**(3) X-ray crystallographic structure and data for compound 3a, 4a, and 5a.**

**3.1. X-ray crystallographic structure and data for compound 3a**

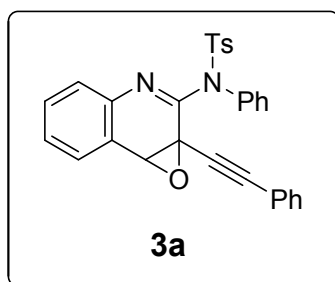

**CCDC : 1995915**

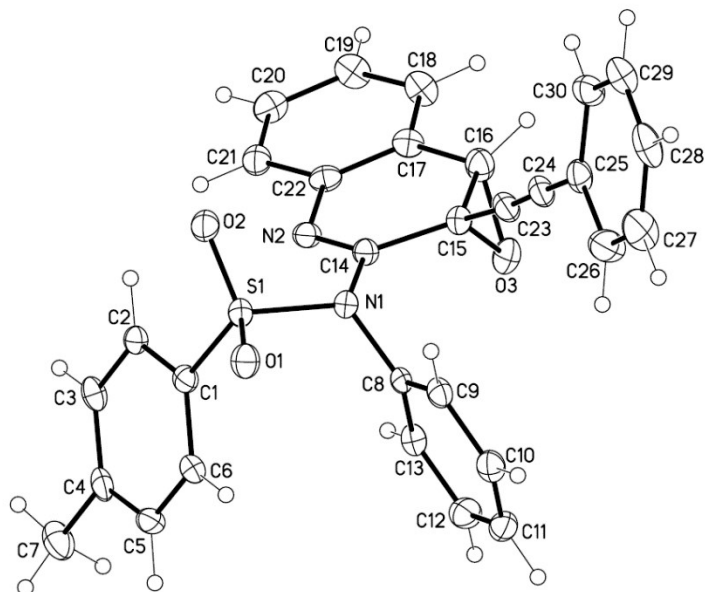

**Figure S1 - Molecular structure of compound 3a**

Table 1. Crystal data and structure refinement for 191051lt\_0m\_a.

|                        |                                                                 |                  |
|------------------------|-----------------------------------------------------------------|------------------|
| Identification code    | 191051lt_0m_a                                                   |                  |
| Empirical formula      | C <sub>30</sub> H <sub>22</sub> N <sub>2</sub> O <sub>3</sub> S |                  |
| Formula weight         | 490.55                                                          |                  |
| Temperature            | 100(2) K                                                        |                  |
| Wavelength             | 0.71073 Å                                                       |                  |
| Crystal system         | Monoclinic                                                      |                  |
| Space group            | C2/c                                                            |                  |
| Unit cell dimensions   | a = 42.369(2) Å                                                 | α = 90°.         |
|                        | b = 8.2398(4) Å                                                 | β = 105.722(3)°. |
|                        | c = 14.1141(7) Å                                                | γ = 90°.         |
| Volume                 | 4743.1(4) Å <sup>3</sup>                                        |                  |
| Z                      | 8                                                               |                  |
| Density (calculated)   | 1.374 Mg/m <sup>3</sup>                                         |                  |
| Absorption coefficient | 0.173 mm <sup>-1</sup>                                          |                  |

|                                   |                                             |
|-----------------------------------|---------------------------------------------|
| F(000)                            | 2048                                        |
| Crystal size                      | 0.15 x 0.03 x 0.03 mm <sup>3</sup>          |
| Theta range for data collection   | 0.999 to 26.395°.                           |
| Index ranges                      | -52<=h<=51, -10<=k<=10, -12<=l<=17          |
| Reflections collected             | 20380                                       |
| Independent reflections           | 4837 [R(int) = 0.0435]                      |
| Completeness to theta = 25.242°   | 99.6 %                                      |
| Absorption correction             | Semi-empirical from equivalents             |
| Max. and min. transmission        | 0.7454 and 0.6706                           |
| Refinement method                 | Full-matrix least-squares on F <sup>2</sup> |
| Data / restraints / parameters    | 4837 / 0 / 326                              |
| Goodness-of-fit on F <sup>2</sup> | 1.210                                       |
| Final R indices [I>2sigma(I)]     | R1 = 0.0833, wR2 = 0.2087                   |
| R indices (all data)              | R1 = 0.0943, wR2 = 0.2145                   |
| Extinction coefficient            | n/a                                         |
| Largest diff. peak and hole       | 1.166 and -0.525 e.Å <sup>-3</sup>          |

Table 2. Atomic coordinates (x 10<sup>4</sup>) and equivalent isotropic displacement parameters (Å<sup>2</sup>x 10<sup>3</sup>) for 191051lt\_0m\_a. U(eq) is defined as one third of the trace of the orthogonalized U<sup>ij</sup> tensor.

|       | x       | y       | z        | U(eq) |
|-------|---------|---------|----------|-------|
| S(1)  | 4162(1) | 4895(1) | 7758(1)  | 17(1) |
| N(1)  | 3892(1) | 3402(5) | 7290(3)  | 18(1) |
| N(2)  | 3761(1) | 3033(5) | 8778(3)  | 18(1) |
| O(1)  | 4302(1) | 5293(4) | 6970(2)  | 23(1) |
| O(2)  | 3985(1) | 6103(4) | 8138(2)  | 24(1) |
| O(3)  | 3363(1) | 306(4)  | 7503(2)  | 26(1) |
| C(1)  | 4475(1) | 4052(5) | 8714(3)  | 18(1) |
| C(2)  | 4467(1) | 4248(5) | 9683(3)  | 18(1) |
| C(3)  | 4714(1) | 3544(5) | 10425(3) | 20(1) |
| C(4)  | 4964(1) | 2644(5) | 10214(3) | 21(1) |
| C(5)  | 4969(1) | 2513(6) | 9234(4)  | 22(1) |
| C(6)  | 4725(1) | 3203(6) | 8481(3)  | 20(1) |
| C(7)  | 5223(1) | 1862(6) | 11030(4) | 31(1) |
| C(8)  | 3992(1) | 2223(5) | 6661(3)  | 17(1) |
| C(9)  | 3948(1) | 2584(6) | 5672(3)  | 20(1) |
| C(10) | 4050(1) | 1468(6) | 5083(3)  | 22(1) |
| C(11) | 4192(1) | 25(6)   | 5475(3)  | 23(1) |

|       |         |         |          |       |
|-------|---------|---------|----------|-------|
| C(12) | 4231(1) | -330(6) | 6460(4)  | 25(1) |
| C(13) | 4131(1) | 771(6)  | 7063(3)  | 21(1) |
| C(14) | 3683(1) | 2832(5) | 7854(3)  | 18(1) |
| C(15) | 3375(1) | 2011(6) | 7262(3)  | 20(1) |
| C(16) | 3155(1) | 1422(6) | 7852(3)  | 24(1) |
| C(17) | 3249(1) | 1763(6) | 8915(3)  | 20(1) |
| C(18) | 3050(1) | 1323(6) | 9505(4)  | 26(1) |
| C(19) | 3149(1) | 1626(6) | 10510(4) | 26(1) |
| C(20) | 3445(1) | 2403(6) | 10925(3) | 24(1) |
| C(21) | 3641(1) | 2866(5) | 10339(3) | 21(1) |
| C(22) | 3545(1) | 2554(5) | 9329(3)  | 20(1) |
| C(23) | 3237(1) | 2503(6) | 6248(3)  | 22(1) |
| C(24) | 3117(1) | 3008(6) | 5439(3)  | 23(1) |
| C(25) | 2994(1) | 3656(6) | 4470(3)  | 22(1) |
| C(26) | 3143(1) | 3291(7) | 3722(4)  | 33(1) |
| C(27) | 3028(1) | 3983(8) | 2800(4)  | 36(1) |
| C(28) | 2765(1) | 5033(7) | 2601(4)  | 32(1) |
| C(29) | 2612(1) | 5393(7) | 3326(4)  | 31(1) |
| C(30) | 2723(1) | 4706(6) | 4251(4)  | 27(1) |

---

Table 3. Bond lengths [Å] and angles [°] for 191051lt\_0m\_a.

---

|            |          |
|------------|----------|
| S(1)-O(2)  | 1.434(3) |
| S(1)-O(1)  | 1.434(3) |
| S(1)-N(1)  | 1.688(4) |
| S(1)-C(1)  | 1.759(5) |
| N(1)-C(14) | 1.420(6) |
| N(1)-C(8)  | 1.454(5) |
| N(2)-C(14) | 1.266(6) |
| N(2)-C(22) | 1.412(6) |
| O(3)-C(16) | 1.449(6) |
| O(3)-C(15) | 1.450(6) |
| C(1)-C(6)  | 1.383(6) |
| C(1)-C(2)  | 1.387(6) |
| C(2)-C(3)  | 1.392(6) |
| C(2)-H(2)  | 0.9500   |
| C(3)-C(4)  | 1.390(7) |
| C(3)-H(3)  | 0.9500   |

|             |          |
|-------------|----------|
| C(4)-C(5)   | 1.392(7) |
| C(4)-C(7)   | 1.504(6) |
| C(5)-C(6)   | 1.387(6) |
| C(5)-H(5)   | 0.9500   |
| C(6)-H(6)   | 0.9500   |
| C(7)-H(7A)  | 0.9800   |
| C(7)-H(7B)  | 0.9800   |
| C(7)-H(7C)  | 0.9800   |
| C(8)-C(13)  | 1.386(6) |
| C(8)-C(9)   | 1.390(6) |
| C(9)-C(10)  | 1.384(6) |
| C(9)-H(9)   | 0.9500   |
| C(10)-C(11) | 1.379(7) |
| C(10)-H(10) | 0.9500   |
| C(11)-C(12) | 1.386(7) |
| C(11)-H(11) | 0.9500   |
| C(12)-C(13) | 1.387(7) |
| C(12)-H(12) | 0.9500   |
| C(13)-H(13) | 0.9500   |
| C(14)-C(15) | 1.505(6) |
| C(15)-C(23) | 1.450(6) |
| C(15)-C(16) | 1.489(6) |
| C(16)-C(17) | 1.472(6) |
| C(16)-H(16) | 1.0000   |
| C(17)-C(18) | 1.384(6) |
| C(17)-C(22) | 1.394(6) |
| C(18)-C(19) | 1.389(7) |
| C(18)-H(18) | 0.9500   |
| C(19)-C(20) | 1.387(7) |
| C(19)-H(19) | 0.9500   |
| C(20)-C(21) | 1.377(7) |
| C(20)-H(20) | 0.9500   |
| C(21)-C(22) | 1.395(6) |
| C(21)-H(21) | 0.9500   |
| C(23)-C(24) | 1.192(7) |
| C(24)-C(25) | 1.429(6) |
| C(25)-C(30) | 1.401(7) |
| C(25)-C(26) | 1.403(7) |



|             |          |
|-------------|----------|
| C(26)-C(27) | 1.384(7) |
| C(26)-H(26) | 0.9500   |
| C(27)-C(28) | 1.379(8) |
| C(27)-H(27) | 0.9500   |
| C(28)-C(29) | 1.381(7) |
| C(28)-H(28) | 0.9500   |
| C(29)-C(30) | 1.383(7) |
| C(29)-H(29) | 0.9500   |
| C(30)-H(30) | 0.9500   |

|                  |            |
|------------------|------------|
| O(2)-S(1)-O(1)   | 120.0(2)   |
| O(2)-S(1)-N(1)   | 106.59(19) |
| O(1)-S(1)-N(1)   | 104.05(19) |
| O(2)-S(1)-C(1)   | 110.4(2)   |
| O(1)-S(1)-C(1)   | 107.5(2)   |
| N(1)-S(1)-C(1)   | 107.7(2)   |
| C(14)-N(1)-C(8)  | 116.7(4)   |
| C(14)-N(1)-S(1)  | 118.7(3)   |
| C(8)-N(1)-S(1)   | 116.6(3)   |
| C(14)-N(2)-C(22) | 120.2(4)   |
| C(16)-O(3)-C(15) | 61.8(3)    |
| C(6)-C(1)-C(2)   | 121.3(4)   |
| C(6)-C(1)-S(1)   | 119.0(3)   |
| C(2)-C(1)-S(1)   | 119.7(3)   |
| C(1)-C(2)-C(3)   | 118.5(4)   |
| C(1)-C(2)-H(2)   | 120.7      |
| C(3)-C(2)-H(2)   | 120.7      |
| C(4)-C(3)-C(2)   | 121.6(4)   |
| C(4)-C(3)-H(3)   | 119.2      |
| C(2)-C(3)-H(3)   | 119.2      |
| C(3)-C(4)-C(5)   | 118.1(4)   |
| C(3)-C(4)-C(7)   | 120.3(4)   |
| C(5)-C(4)-C(7)   | 121.6(4)   |
| C(6)-C(5)-C(4)   | 121.4(4)   |
| C(6)-C(5)-H(5)   | 119.3      |
| C(4)-C(5)-H(5)   | 119.3      |
| C(1)-C(6)-C(5)   | 119.0(4)   |
| C(1)-C(6)-H(6)   | 120.5      |

|                   |          |
|-------------------|----------|
| C(5)-C(6)-H(6)    | 120.5    |
| C(4)-C(7)-H(7A)   | 109.5    |
| C(4)-C(7)-H(7B)   | 109.5    |
| H(7A)-C(7)-H(7B)  | 109.5    |
| C(4)-C(7)-H(7C)   | 109.5    |
| H(7A)-C(7)-H(7C)  | 109.5    |
| H(7B)-C(7)-H(7C)  | 109.5    |
| C(13)-C(8)-C(9)   | 121.4(4) |
| C(13)-C(8)-N(1)   | 119.3(4) |
| C(9)-C(8)-N(1)    | 119.3(4) |
| C(10)-C(9)-C(8)   | 118.9(4) |
| C(10)-C(9)-H(9)   | 120.5    |
| C(8)-C(9)-H(9)    | 120.5    |
| C(11)-C(10)-C(9)  | 120.3(4) |
| C(11)-C(10)-H(10) | 119.9    |
| C(9)-C(10)-H(10)  | 119.9    |
| C(10)-C(11)-C(12) | 120.4(4) |
| C(10)-C(11)-H(11) | 119.8    |
| C(12)-C(11)-H(11) | 119.8    |
| C(11)-C(12)-C(13) | 120.2(4) |
| C(11)-C(12)-H(12) | 119.9    |
| C(13)-C(12)-H(12) | 119.9    |
| C(8)-C(13)-C(12)  | 118.8(4) |
| C(8)-C(13)-H(13)  | 120.6    |
| C(12)-C(13)-H(13) | 120.6    |
| N(2)-C(14)-N(1)   | 120.4(4) |
| N(2)-C(14)-C(15)  | 125.2(4) |
| N(1)-C(14)-C(15)  | 114.5(4) |
| C(23)-C(15)-O(3)  | 118.2(4) |
| C(23)-C(15)-C(16) | 119.7(4) |
| O(3)-C(15)-C(16)  | 59.1(3)  |
| C(23)-C(15)-C(14) | 118.7(4) |
| O(3)-C(15)-C(14)  | 112.7(4) |
| C(16)-C(15)-C(14) | 114.6(4) |
| O(3)-C(16)-C(17)  | 116.6(4) |
| O(3)-C(16)-C(15)  | 59.1(3)  |
| C(17)-C(16)-C(15) | 118.2(4) |
| O(3)-C(16)-H(16)  | 116.8    |

|                   |          |
|-------------------|----------|
| C(17)-C(16)-H(16) | 116.8    |
| C(15)-C(16)-H(16) | 116.8    |
| C(18)-C(17)-C(22) | 119.7(4) |
| C(18)-C(17)-C(16) | 121.7(4) |
| C(22)-C(17)-C(16) | 118.6(4) |
| C(17)-C(18)-C(19) | 120.1(5) |
| C(17)-C(18)-H(18) | 119.9    |
| C(19)-C(18)-H(18) | 119.9    |
| C(20)-C(19)-C(18) | 120.2(4) |
| C(20)-C(19)-H(19) | 119.9    |
| C(18)-C(19)-H(19) | 119.9    |
| C(21)-C(20)-C(19) | 119.9(4) |
| C(21)-C(20)-H(20) | 120.1    |
| C(19)-C(20)-H(20) | 120.1    |
| C(20)-C(21)-C(22) | 120.3(4) |
| C(20)-C(21)-H(21) | 119.8    |
| C(22)-C(21)-H(21) | 119.8    |
| C(17)-C(22)-C(21) | 119.7(4) |
| C(17)-C(22)-N(2)  | 123.1(4) |
| C(21)-C(22)-N(2)  | 117.2(4) |
| C(24)-C(23)-C(15) | 175.4(5) |
| C(23)-C(24)-C(25) | 176.3(5) |
| C(30)-C(25)-C(26) | 118.4(4) |
| C(30)-C(25)-C(24) | 120.4(4) |
| C(26)-C(25)-C(24) | 121.2(5) |
| C(27)-C(26)-C(25) | 120.2(5) |
| C(27)-C(26)-H(26) | 119.9    |
| C(25)-C(26)-H(26) | 119.9    |
| C(28)-C(27)-C(26) | 120.6(5) |
| C(28)-C(27)-H(27) | 119.7    |
| C(26)-C(27)-H(27) | 119.7    |
| C(27)-C(28)-C(29) | 119.9(5) |
| C(27)-C(28)-H(28) | 120.0    |
| C(29)-C(28)-H(28) | 120.0    |
| C(28)-C(29)-C(30) | 120.3(5) |
| C(28)-C(29)-H(29) | 119.9    |
| C(30)-C(29)-H(29) | 119.9    |
| C(29)-C(30)-C(25) | 120.6(5) |

|                   |       |
|-------------------|-------|
| C(29)-C(30)-H(30) | 119.7 |
| C(25)-C(30)-H(30) | 119.7 |

---

Symmetry transformations used to generate equivalent atoms:

Table 4. Anisotropic displacement parameters ( $\text{\AA}^2 \times 10^3$ ) for 191051lt\_0m\_a. The anisotropic displacement factor exponent takes the form:  $-2\pi^2 [ h^2 a^{*2} U^{11} + \dots + 2 h k a^* b^* U^{12} ]$

---

|       | U <sup>11</sup> | U <sup>22</sup> | U <sup>33</sup> | U <sup>23</sup> | U <sup>13</sup> | U <sup>12</sup> |
|-------|-----------------|-----------------|-----------------|-----------------|-----------------|-----------------|
| S(1)  | 18(1)           | 15(1)           | 16(1)           | 0(1)            | 2(1)            | -2(1)           |
| N(1)  | 17(2)           | 18(2)           | 19(2)           | -4(2)           | 3(2)            | -1(2)           |
| N(2)  | 17(2)           | 20(2)           | 19(2)           | 0(2)            | 5(2)            | 2(2)            |
| O(1)  | 26(2)           | 21(2)           | 23(2)           | 1(1)            | 6(1)            | -5(1)           |
| O(2)  | 23(2)           | 19(2)           | 24(2)           | -2(1)           | 0(1)            | 2(1)            |
| O(3)  | 31(2)           | 21(2)           | 27(2)           | -4(1)           | 7(2)            | -6(1)           |
| C(1)  | 17(2)           | 13(2)           | 22(2)           | 1(2)            | 4(2)            | -2(2)           |
| C(2)  | 17(2)           | 15(2)           | 22(2)           | -2(2)           | 4(2)            | -3(2)           |
| C(3)  | 19(2)           | 22(2)           | 17(2)           | 3(2)            | 2(2)            | -7(2)           |
| C(4)  | 18(2)           | 17(2)           | 24(2)           | 0(2)            | -3(2)           | -5(2)           |
| C(5)  | 15(2)           | 20(2)           | 31(2)           | -3(2)           | 7(2)            | -1(2)           |
| C(6)  | 15(2)           | 22(2)           | 22(2)           | -3(2)           | 3(2)            | -3(2)           |
| C(7)  | 25(3)           | 26(3)           | 36(3)           | 5(2)            | -4(2)           | -1(2)           |
| C(8)  | 13(2)           | 18(2)           | 20(2)           | -5(2)           | 5(2)            | -5(2)           |
| C(9)  | 17(2)           | 18(2)           | 22(2)           | 0(2)            | 3(2)            | -3(2)           |
| C(10) | 21(2)           | 28(2)           | 20(2)           | -2(2)           | 8(2)            | -6(2)           |
| C(11) | 23(2)           | 22(2)           | 26(2)           | -5(2)           | 10(2)           | -4(2)           |
| C(12) | 24(2)           | 20(2)           | 32(3)           | 1(2)            | 7(2)            | 1(2)            |
| C(13) | 20(2)           | 23(2)           | 19(2)           | -2(2)           | 2(2)            | -4(2)           |
| C(14) | 17(2)           | 16(2)           | 21(2)           | -1(2)           | 5(2)            | -1(2)           |
| C(15) | 19(2)           | 21(2)           | 18(2)           | -3(2)           | 3(2)            | -1(2)           |
| C(16) | 23(2)           | 27(2)           | 24(2)           | -3(2)           | 8(2)            | -6(2)           |
| C(17) | 21(2)           | 21(2)           | 20(2)           | 3(2)            | 6(2)            | 2(2)            |
| C(18) | 23(2)           | 30(3)           | 23(2)           | 5(2)            | 5(2)            | -2(2)           |
| C(19) | 26(3)           | 29(3)           | 23(2)           | 8(2)            | 8(2)            | 0(2)            |
| C(20) | 30(3)           | 25(2)           | 18(2)           | 3(2)            | 6(2)            | 5(2)            |
| C(21) | 22(2)           | 18(2)           | 21(2)           | 0(2)            | 2(2)            | 1(2)            |
| C(22) | 22(2)           | 17(2)           | 22(2)           | 3(2)            | 9(2)            | 4(2)            |
| C(23) | 16(2)           | 28(2)           | 22(2)           | -3(2)           | 3(2)            | -3(2)           |

---

|       |       |       |       |       |       |        |
|-------|-------|-------|-------|-------|-------|--------|
| C(24) | 17(2) | 29(3) | 22(2) | -5(2) | 2(2)  | -4(2)  |
| C(25) | 21(2) | 28(2) | 17(2) | -3(2) | 2(2)  | -4(2)  |
| C(26) | 25(3) | 50(3) | 23(2) | -4(2) | 6(2)  | 5(2)   |
| C(27) | 32(3) | 63(4) | 13(2) | -3(2) | 6(2)  | -6(3)  |
| C(28) | 26(3) | 44(3) | 20(2) | 4(2)  | -1(2) | -13(2) |
| C(29) | 21(2) | 37(3) | 32(3) | -2(2) | 1(2)  | -5(2)  |
| C(30) | 20(2) | 36(3) | 25(2) | -4(2) | 8(2)  | -1(2)  |

Table 5. Hydrogen coordinates ( $\times 10^4$ ) and isotropic displacement parameters ( $\text{\AA}^2 \times 10^{-3}$ ) for 191051lt\_0m\_a.

|       | x    | y     | z     | U(eq) |
|-------|------|-------|-------|-------|
| H(2)  | 4296 | 4848  | 9838  | 22    |
| H(3)  | 4713 | 3682  | 11092 | 24    |
| H(5)  | 5143 | 1938  | 9078  | 26    |
| H(6)  | 4731 | 3095  | 7816  | 24    |
| H(7A) | 5205 | 2268  | 11666 | 47    |
| H(7B) | 5441 | 2125  | 10954 | 47    |
| H(7C) | 5193 | 682   | 11002 | 47    |
| H(9)  | 3851 | 3580  | 5405  | 24    |
| H(10) | 4021 | 1697  | 4405  | 27    |
| H(11) | 4263 | -729  | 5068  | 27    |
| H(12) | 4327 | -1332 | 6723  | 30    |
| H(13) | 4157 | 535   | 7739  | 25    |
| H(16) | 2915 | 1385  | 7512  | 29    |
| H(18) | 2845 | 813   | 9222  | 31    |
| H(19) | 3014 | 1300  | 10915 | 31    |
| H(20) | 3511 | 2615  | 11612 | 29    |
| H(21) | 3843 | 3401  | 10623 | 26    |
| H(26) | 3324 | 2566  | 3850  | 39    |
| H(27) | 3131 | 3733  | 2298  | 43    |
| H(28) | 2688 | 5508  | 1967  | 38    |
| H(29) | 2431 | 6115  | 3189  | 37    |
| H(30) | 2615 | 4949  | 4743  | 32    |

### 3.2. X-ray crystallographic structure and data for compound 4a

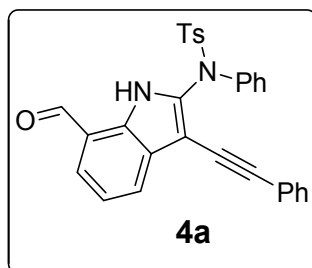

CCDC : 1996554

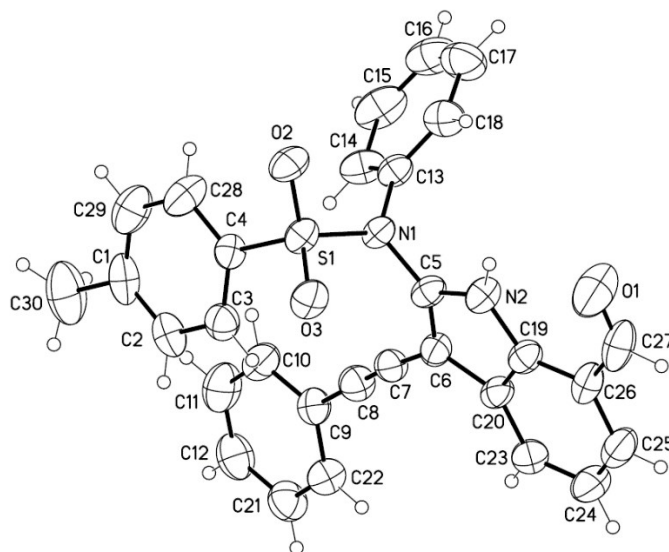

**Figure S2 - Molecular structure of compound 4a**

Table 1. Crystal data and structure refinement for mo\_191107\_0m.

|                        |                          |                            |
|------------------------|--------------------------|----------------------------|
| Identification code    | mo_191107_0m             |                            |
| Empirical formula      | C30 H22 N2 O3 S          |                            |
| Formula weight         | 490.55                   |                            |
| Temperature            | 296(2) K                 |                            |
| Wavelength             | 0.71073 Å                |                            |
| Crystal system         | Triclinic                |                            |
| Space group            | P-1                      |                            |
| Unit cell dimensions   | a = 8.7173(19) Å         | $\alpha = 91.258(7)^\circ$ |
|                        | b = 9.0625(18) Å         | $\beta = 97.362(7)^\circ$  |
|                        | c = 15.386(4) Å          | $\gamma = 92.766(6)^\circ$ |
| Volume                 | 1203.6(4) Å <sup>3</sup> |                            |
| Z                      | 2                        |                            |
| Density (calculated)   | 1.354 Mg/m <sup>3</sup>  |                            |
| Absorption coefficient | 0.171 mm <sup>-1</sup>   |                            |
| F(000)                 | 512                      |                            |

|                                   |                                             |
|-----------------------------------|---------------------------------------------|
| Crystal size                      | 0.05 x 0.03 x 0.03 mm <sup>3</sup>          |
| Theta range for data collection   | 2.251 to 26.503°.                           |
| Index ranges                      | -10<=h<=10, -11<=k<=11, -19<=l<=19          |
| Reflections collected             | 21928                                       |
| Independent reflections           | 4977 [R(int) = 0.1699]                      |
| Completeness to theta = 25.242°   | 100.0 %                                     |
| Absorption correction             | Semi-empirical from equivalents             |
| Max. and min. transmission        | 0.7454 and 0.6578                           |
| Refinement method                 | Full-matrix least-squares on F <sup>2</sup> |
| Data / restraints / parameters    | 4977 / 0 / 326                              |
| Goodness-of-fit on F <sup>2</sup> | 1.024                                       |
| Final R indices [I>2sigma(I)]     | R1 = 0.0811, wR2 = 0.1152                   |
| R indices (all data)              | R1 = 0.2446, wR2 = 0.1696                   |
| Extinction coefficient            | n/a                                         |
| Largest diff. peak and hole       | 0.264 and -0.444 e.Å <sup>-3</sup>          |

Table 2. Atomic coordinates (x 10<sup>4</sup>) and equivalent isotropic displacement parameters (Å<sup>2</sup>x 10<sup>3</sup>) for mo\_191107\_0m. U(eq) is defined as one third of the trace of the orthogonalized U<sup>ij</sup> tensor.

|       | x       | y       | z       | U(eq) |
|-------|---------|---------|---------|-------|
| C(1)  | 533(6)  | 2311(6) | 2746(4) | 55(2) |
| C(2)  | 1547(6) | 3464(6) | 3086(3) | 52(1) |
| C(3)  | 2545(6) | 4162(5) | 2590(3) | 44(1) |
| C(4)  | 2532(5) | 3713(5) | 1724(3) | 36(1) |
| C(5)  | 6719(5) | 4653(4) | 2014(3) | 37(1) |
| C(6)  | 7059(5) | 4661(5) | 2907(3) | 39(1) |
| C(7)  | 6245(6) | 3847(5) | 3512(3) | 42(1) |
| C(8)  | 5646(6) | 3213(5) | 4062(3) | 46(1) |
| C(9)  | 4890(6) | 2505(5) | 4728(3) | 40(1) |
| C(10) | 3744(6) | 1385(5) | 4540(3) | 51(1) |
| C(11) | 3070(6) | 745(6)  | 5214(4) | 65(2) |
| C(12) | 3524(7) | 1195(6) | 6072(4) | 60(2) |
| C(13) | 5858(5) | 2321(5) | 1233(3) | 37(1) |
| C(14) | 5277(6) | 1165(5) | 1701(3) | 52(1) |
| C(15) | 5605(7) | -284(5) | 1486(4) | 65(2) |
| C(16) | 6533(7) | -535(6) | 841(4)  | 68(2) |
| C(17) | 7107(7) | 610(6)  | 399(4)  | 66(2) |
| C(18) | 6753(6) | 2029(5) | 594(3)  | 50(1) |

|       |          |         |         |       |
|-------|----------|---------|---------|-------|
| C(19) | 8804(6)  | 6200(5) | 2343(3) | 38(1) |
| C(20) | 8381(5)  | 5656(5) | 3131(3) | 39(1) |
| C(21) | 4654(6)  | 2307(6) | 6265(3) | 54(1) |
| C(22) | 5330(6)  | 2961(5) | 5603(3) | 46(1) |
| C(23) | 9226(6)  | 6121(5) | 3922(3) | 50(1) |
| C(24) | 10489(6) | 7094(6) | 3917(4) | 60(2) |
| C(25) | 10924(6) | 7602(5) | 3137(4) | 54(1) |
| C(26) | 10098(6) | 7172(5) | 2327(3) | 46(1) |
| C(27) | 10587(6) | 7692(5) | 1522(4) | 61(2) |
| C(28) | 1515(6)  | 2603(5) | 1362(4) | 62(2) |
| C(29) | 516(7)   | 1903(6) | 1876(4) | 66(2) |
| C(30) | -558(7)  | 1520(6) | 3300(4) | 86(2) |
| N(1)  | 5566(4)  | 3829(3) | 1459(2) | 35(1) |
| N(2)  | 7783(4)  | 5573(4) | 1665(2) | 39(1) |
| O(1)  | 9941(5)  | 7409(4) | 790(3)  | 83(1) |
| O(2)  | 3450(4)  | 4103(3) | 224(2)  | 48(1) |
| O(3)  | 4121(4)  | 6095(3) | 1380(2) | 47(1) |
| S(1)  | 3901(2)  | 4558(1) | 1123(1) | 39(1) |

Table 3. Bond lengths [ $\text{\AA}$ ] and angles [ $^\circ$ ] for mo\_191107\_0m.

|            |          |
|------------|----------|
| C(1)-C(29) | 1.379(7) |
| C(1)-C(2)  | 1.384(7) |
| C(1)-C(30) | 1.521(7) |
| C(2)-C(3)  | 1.369(6) |
| C(2)-H(19) | 0.9300   |
| C(3)-C(4)  | 1.384(6) |
| C(3)-H(2)  | 0.9300   |
| C(4)-C(28) | 1.368(6) |
| C(4)-S(1)  | 1.758(5) |
| C(5)-C(6)  | 1.368(6) |
| C(5)-N(2)  | 1.384(5) |
| C(5)-N(1)  | 1.406(5) |
| C(6)-C(20) | 1.430(6) |
| C(6)-C(7)  | 1.436(7) |
| C(7)-C(8)  | 1.194(6) |
| C(8)-C(9)  | 1.435(7) |
| C(9)-C(10) | 1.388(6) |



|             |          |
|-------------|----------|
| C(9)-C(22)  | 1.399(6) |
| C(10)-C(11) | 1.381(7) |
| C(10)-H(11) | 0.9300   |
| C(11)-C(12) | 1.376(7) |
| C(11)-H(10) | 0.9300   |
| C(12)-C(21) | 1.374(7) |
| C(12)-H(1)  | 0.9300   |
| C(13)-C(18) | 1.360(6) |
| C(13)-C(14) | 1.396(6) |
| C(13)-N(1)  | 1.445(5) |
| C(14)-C(15) | 1.399(6) |
| C(14)-H(3)  | 0.9300   |
| C(15)-C(16) | 1.380(7) |
| C(15)-H(4)  | 0.9300   |
| C(16)-C(17) | 1.362(7) |
| C(16)-H(5)  | 0.9300   |
| C(17)-C(18) | 1.372(6) |
| C(17)-H(6)  | 0.9300   |
| C(18)-H(7)  | 0.9300   |
| C(19)-N(2)  | 1.375(5) |
| C(19)-C(26) | 1.400(6) |
| C(19)-C(20) | 1.405(6) |
| C(20)-C(23) | 1.384(6) |
| C(21)-C(22) | 1.373(6) |
| C(21)-H(9)  | 0.9300   |
| C(22)-H(8)  | 0.9300   |
| C(23)-C(24) | 1.378(7) |
| C(23)-H(15) | 0.9300   |
| C(24)-C(25) | 1.386(7) |
| C(24)-H(14) | 0.9300   |
| C(25)-C(26) | 1.395(6) |
| C(25)-H(13) | 0.9300   |
| C(26)-C(27) | 1.441(7) |
| C(27)-O(1)  | 1.209(6) |
| C(27)-H(12) | 0.9300   |
| C(28)-C(29) | 1.390(7) |
| C(28)-H(18) | 0.9300   |
| C(29)-H(17) | 0.9300   |

|                   |          |
|-------------------|----------|
| C(30)-H(30A)      | 0.9600   |
| C(30)-H(30B)      | 0.9600   |
| C(30)-H(30C)      | 0.9600   |
| N(1)-S(1)         | 1.651(3) |
| N(2)-H(16)        | 0.8600   |
| O(2)-S(1)         | 1.435(3) |
| O(3)-S(1)         | 1.437(3) |
|                   |          |
| C(29)-C(1)-C(2)   | 118.0(5) |
| C(29)-C(1)-C(30)  | 120.2(6) |
| C(2)-C(1)-C(30)   | 121.8(6) |
| C(3)-C(2)-C(1)    | 121.8(5) |
| C(3)-C(2)-H(19)   | 119.1    |
| C(1)-C(2)-H(19)   | 119.1    |
| C(2)-C(3)-C(4)    | 119.2(5) |
| C(2)-C(3)-H(2)    | 120.4    |
| C(4)-C(3)-H(2)    | 120.4    |
| C(28)-C(4)-C(3)   | 120.4(5) |
| C(28)-C(4)-S(1)   | 121.4(4) |
| C(3)-C(4)-S(1)    | 118.1(4) |
| C(6)-C(5)-N(2)    | 109.7(4) |
| C(6)-C(5)-N(1)    | 129.9(4) |
| N(2)-C(5)-N(1)    | 120.4(4) |
| C(5)-C(6)-C(20)   | 106.8(4) |
| C(5)-C(6)-C(7)    | 127.1(4) |
| C(20)-C(6)-C(7)   | 126.1(4) |
| C(8)-C(7)-C(6)    | 175.2(5) |
| C(7)-C(8)-C(9)    | 177.6(5) |
| C(10)-C(9)-C(22)  | 118.8(5) |
| C(10)-C(9)-C(8)   | 122.6(5) |
| C(22)-C(9)-C(8)   | 118.5(5) |
| C(11)-C(10)-C(9)  | 119.6(5) |
| C(11)-C(10)-H(11) | 120.2    |
| C(9)-C(10)-H(11)  | 120.2    |
| C(12)-C(11)-C(10) | 121.0(5) |
| C(12)-C(11)-H(10) | 119.5    |
| C(10)-C(11)-H(10) | 119.5    |
| C(21)-C(12)-C(11) | 119.8(5) |

|                   |          |
|-------------------|----------|
| C(21)-C(12)-H(1)  | 120.1    |
| C(11)-C(12)-H(1)  | 120.1    |
| C(18)-C(13)-C(14) | 119.9(4) |
| C(18)-C(13)-N(1)  | 120.3(4) |
| C(14)-C(13)-N(1)  | 119.7(4) |
| C(13)-C(14)-C(15) | 118.8(5) |
| C(13)-C(14)-H(3)  | 120.6    |
| C(15)-C(14)-H(3)  | 120.6    |
| C(16)-C(15)-C(14) | 119.6(5) |
| C(16)-C(15)-H(4)  | 120.2    |
| C(14)-C(15)-H(4)  | 120.2    |
| C(17)-C(16)-C(15) | 120.8(5) |
| C(17)-C(16)-H(5)  | 119.6    |
| C(15)-C(16)-H(5)  | 119.6    |
| C(16)-C(17)-C(18) | 119.7(6) |
| C(16)-C(17)-H(6)  | 120.1    |
| C(18)-C(17)-H(6)  | 120.1    |
| C(13)-C(18)-C(17) | 121.2(5) |
| C(13)-C(18)-H(7)  | 119.4    |
| C(17)-C(18)-H(7)  | 119.4    |
| N(2)-C(19)-C(26)  | 130.2(4) |
| N(2)-C(19)-C(20)  | 108.0(4) |
| C(26)-C(19)-C(20) | 121.8(4) |
| C(23)-C(20)-C(19) | 119.8(5) |
| C(23)-C(20)-C(6)  | 133.1(5) |
| C(19)-C(20)-C(6)  | 107.1(4) |
| C(22)-C(21)-C(12) | 120.0(5) |
| C(22)-C(21)-H(9)  | 120.0    |
| C(12)-C(21)-H(9)  | 120.0    |
| C(21)-C(22)-C(9)  | 120.8(5) |
| C(21)-C(22)-H(8)  | 119.6    |
| C(9)-C(22)-H(8)   | 119.6    |
| C(24)-C(23)-C(20) | 119.0(5) |
| C(24)-C(23)-H(15) | 120.5    |
| C(20)-C(23)-H(15) | 120.5    |
| C(23)-C(24)-C(25) | 121.1(5) |
| C(23)-C(24)-H(14) | 119.4    |
| C(25)-C(24)-H(14) | 119.4    |

|                     |            |
|---------------------|------------|
| C(24)-C(25)-C(26)   | 121.8(5)   |
| C(24)-C(25)-H(13)   | 119.1      |
| C(26)-C(25)-H(13)   | 119.1      |
| C(25)-C(26)-C(19)   | 116.5(5)   |
| C(25)-C(26)-C(27)   | 120.9(5)   |
| C(19)-C(26)-C(27)   | 122.6(4)   |
| O(1)-C(27)-C(26)    | 126.2(5)   |
| O(1)-C(27)-H(12)    | 116.9      |
| C(26)-C(27)-H(12)   | 116.9      |
| C(4)-C(28)-C(29)    | 119.5(5)   |
| C(4)-C(28)-H(18)    | 120.2      |
| C(29)-C(28)-H(18)   | 120.2      |
| C(1)-C(29)-C(28)    | 121.0(5)   |
| C(1)-C(29)-H(17)    | 119.5      |
| C(28)-C(29)-H(17)   | 119.5      |
| C(1)-C(30)-H(30A)   | 109.5      |
| C(1)-C(30)-H(30B)   | 109.5      |
| H(30A)-C(30)-H(30B) | 109.5      |
| C(1)-C(30)-H(30C)   | 109.5      |
| H(30A)-C(30)-H(30C) | 109.5      |
| H(30B)-C(30)-H(30C) | 109.5      |
| C(5)-N(1)-C(13)     | 118.1(3)   |
| C(5)-N(1)-S(1)      | 120.1(3)   |
| C(13)-N(1)-S(1)     | 121.7(3)   |
| C(19)-N(2)-C(5)     | 108.5(4)   |
| C(19)-N(2)-H(16)    | 125.8      |
| C(5)-N(2)-H(16)     | 125.8      |
| O(2)-S(1)-O(3)      | 121.14(18) |
| O(2)-S(1)-N(1)      | 107.93(18) |
| O(3)-S(1)-N(1)      | 105.32(18) |
| O(2)-S(1)-C(4)      | 106.4(2)   |
| O(3)-S(1)-C(4)      | 109.1(2)   |
| N(1)-S(1)-C(4)      | 106.10(18) |

---

Symmetry transformations used to generate equivalent atoms:

Table 4. Anisotropic displacement parameters ( $\text{\AA}^2 \times 10^3$ ) for mo\_191107\_0m. The anisotropic displacement factor exponent takes the form:  $-2\pi^2 [ h^2 a^{*2} U^{11} + \dots + 2 h k a^* b^* U^{12} ]$

---

|       | U <sup>11</sup> | U <sup>22</sup> | U <sup>33</sup> | U <sup>23</sup> | U <sup>13</sup> | U <sup>12</sup> |
|-------|-----------------|-----------------|-----------------|-----------------|-----------------|-----------------|
| C(1)  | 34(4)           | 57(4)           | 78(4)           | 25(3)           | 15(3)           | 9(3)            |
| C(2)  | 43(4)           | 59(3)           | 57(3)           | 13(3)           | 18(3)           | 10(3)           |
| C(3)  | 42(3)           | 40(3)           | 52(3)           | 2(2)            | 7(3)            | 4(2)            |
| C(4)  | 34(3)           | 40(3)           | 35(3)           | 7(2)            | 4(2)            | 0(2)            |
| C(5)  | 39(3)           | 30(3)           | 38(3)           | 1(2)            | -6(2)           | 2(2)            |
| C(6)  | 33(3)           | 38(3)           | 45(3)           | -3(2)           | 3(2)            | -1(2)           |
| C(7)  | 37(3)           | 45(3)           | 43(3)           | -7(3)           | -1(3)           | 10(3)           |
| C(8)  | 46(4)           | 48(3)           | 44(3)           | 0(3)            | 5(3)            | 4(3)            |
| C(9)  | 38(3)           | 40(3)           | 42(3)           | 8(2)            | 3(2)            | 7(3)            |
| C(10) | 46(4)           | 48(3)           | 54(3)           | -2(3)           | -5(3)           | -1(3)           |
| C(11) | 53(4)           | 56(4)           | 84(5)           | 13(3)           | 12(3)           | -13(3)          |
| C(12) | 54(4)           | 68(4)           | 61(4)           | 14(3)           | 25(3)           | 0(3)            |
| C(13) | 41(3)           | 30(3)           | 38(3)           | 2(2)            | -2(2)           | -2(2)           |
| C(14) | 70(4)           | 44(3)           | 39(3)           | 0(2)            | -2(3)           | -1(3)           |
| C(15) | 88(5)           | 34(3)           | 68(4)           | 11(3)           | -11(4)          | -10(3)          |
| C(16) | 87(5)           | 42(4)           | 69(4)           | -10(3)          | -20(4)          | 16(3)           |
| C(17) | 72(5)           | 58(4)           | 67(4)           | -12(3)          | 4(3)            | 23(4)           |
| C(18) | 58(4)           | 43(3)           | 47(3)           | 2(2)            | 1(3)            | 10(3)           |
| C(19) | 38(3)           | 35(3)           | 39(3)           | 2(2)            | -3(2)           | 2(2)            |
| C(20) | 35(3)           | 37(3)           | 41(3)           | -4(2)           | -8(2)           | 8(2)            |
| C(21) | 55(4)           | 59(4)           | 50(3)           | 4(3)            | 15(3)           | 1(3)            |
| C(22) | 50(4)           | 42(3)           | 44(3)           | 3(2)            | 4(3)            | -1(3)           |
| C(23) | 46(4)           | 64(4)           | 40(3)           | -7(3)           | 2(3)            | 3(3)            |
| C(24) | 51(4)           | 69(4)           | 54(4)           | -13(3)          | -10(3)          | 1(3)            |
| C(25) | 41(4)           | 46(3)           | 71(4)           | -6(3)           | -9(3)           | -5(3)           |
| C(26) | 33(3)           | 42(3)           | 62(4)           | 7(3)            | -3(3)           | -4(3)           |
| C(27) | 38(4)           | 56(3)           | 86(5)           | 19(3)           | 0(3)            | -16(3)          |
| C(28) | 60(4)           | 61(4)           | 59(4)           | -1(3)           | -7(3)           | -18(3)          |
| C(29) | 54(4)           | 57(4)           | 83(5)           | 10(3)           | 0(3)            | -18(3)          |
| C(30) | 62(5)           | 80(4)           | 126(6)          | 38(4)           | 41(4)           | 2(4)            |
| N(1)  | 35(2)           | 29(2)           | 38(2)           | 1(2)            | -4(2)           | 0(2)            |
| N(2)  | 42(3)           | 36(2)           | 37(2)           | 9(2)            | 1(2)            | -7(2)           |
| O(1)  | 68(3)           | 113(3)          | 62(3)           | 19(2)           | -4(2)           | -28(3)          |
| O(2)  | 53(2)           | 56(2)           | 32(2)           | 2(2)            | -7(2)           | -4(2)           |
| O(3)  | 48(2)           | 24(2)           | 66(2)           | 4(2)            | 1(2)            | -1(2)           |
| S(1)  | 39(1)           | 36(1)           | 41(1)           | 6(1)            | -1(1)           | -2(1)           |

Table 5. Hydrogen coordinates ( $\times 10^4$ ) and isotropic displacement parameters ( $\text{\AA}^2 \times 10^{-3}$ ) for mo\_191107\_0m.

|        | x     | y     | z    | U(eq) |
|--------|-------|-------|------|-------|
| H(19)  | 1551  | 3774  | 3666 | 62    |
| H(2)   | 3223  | 4930  | 2834 | 53    |
| H(11)  | 3433  | 1067  | 3962 | 61    |
| H(10)  | 2298  | -1    | 5086 | 78    |
| H(1)   | 3067  | 749   | 6520 | 72    |
| H(3)   | 4683  | 1354  | 2148 | 62    |
| H(4)   | 5201  | -1074 | 1776 | 78    |
| H(5)   | 6769  | -1496 | 705  | 82    |
| H(6)   | 7735  | 431   | -32  | 79    |
| H(7)   | 7132  | 2805  | 284  | 60    |
| H(9)   | 4960  | 2615  | 6845 | 65    |
| H(8)   | 6090  | 3716  | 5737 | 55    |
| H(15)  | 8946  | 5780  | 4448 | 60    |
| H(14)  | 11058 | 7415  | 4445 | 72    |
| H(13)  | 11791 | 8247  | 3154 | 65    |
| H(12)  | 11483 | 8303  | 1571 | 73    |
| H(18)  | 1492  | 2320  | 775  | 74    |
| H(17)  | -174  | 1148  | 1629 | 79    |
| H(30A) | -1534 | 1282  | 2949 | 130   |
| H(30B) | -715  | 2152  | 3787 | 130   |
| H(30C) | -114  | 628   | 3515 | 130   |
| H(16)  | 7803  | 5726  | 1117 | 47    |

### 3.3. X-ray crystallographic structure and data for compound 5a

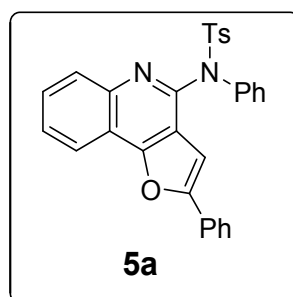

CCDC : 1996563

S50

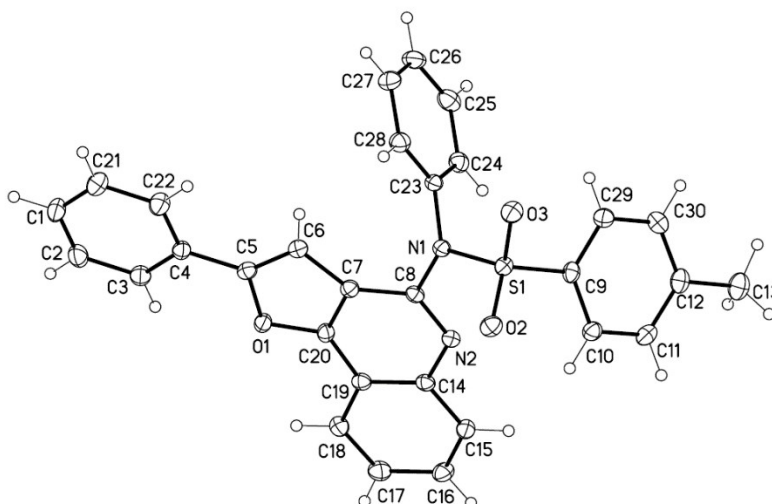

**Figure S2 - Molecular structure of compound 5a**

Table 1. Crystal data and structure refinement for mo\_191113lt\_0m.

|                                 |                                                                 |                   |
|---------------------------------|-----------------------------------------------------------------|-------------------|
| Identification code             | mo_191113LT_0m                                                  |                   |
| Empirical formula               | C <sub>30</sub> H <sub>22</sub> N <sub>2</sub> O <sub>3</sub> S |                   |
| Formula weight                  | 490.55                                                          |                   |
| Temperature                     | 100(2) K                                                        |                   |
| Wavelength                      | 0.71073 Å                                                       |                   |
| Crystal system                  | Monoclinic                                                      |                   |
| Space group                     | P2 <sub>1</sub> /c                                              |                   |
| Unit cell dimensions            | a = 11.8170(2) Å                                                | α = 90°.          |
|                                 | b = 9.2806(2) Å                                                 | β = 94.1040(10)°. |
|                                 | c = 21.6826(4) Å                                                | γ = 90°.          |
| Volume                          | 2371.81(8) Å <sup>3</sup>                                       |                   |
| Z                               | 4                                                               |                   |
| Density (calculated)            | 1.374 Mg/m <sup>3</sup>                                         |                   |
| Absorption coefficient          | 0.173 mm <sup>-1</sup>                                          |                   |
| F(000)                          | 1024                                                            |                   |
| Crystal size                    | 0.15 x 0.12 x 0.11 mm <sup>3</sup>                              |                   |
| Theta range for data collection | 1.728 to 26.414°.                                               |                   |
| Index ranges                    | -14 ≤ h ≤ 14, -11 ≤ k ≤ 11, -27 ≤ l ≤ 26                        |                   |
| Reflections collected           | 27010                                                           |                   |
| Independent reflections         | 4860 [R(int) = 0.0320]                                          |                   |
| Completeness to theta = 25.242° | 99.9 %                                                          |                   |
| Absorption correction           | Semi-empirical from equivalents                                 |                   |
| Max. and min. transmission      | 0.7454 and 0.6992                                               |                   |
| Refinement method               | Full-matrix least-squares on F <sup>2</sup>                     |                   |

|                                   |                                    |
|-----------------------------------|------------------------------------|
| Data / restraints / parameters    | 4860 / 0 / 326                     |
| Goodness-of-fit on F <sup>2</sup> | 1.026                              |
| Final R indices [I>2sigma(I)]     | R1 = 0.0324, wR2 = 0.0775          |
| R indices (all data)              | R1 = 0.0431, wR2 = 0.0833          |
| Extinction coefficient            | n/a                                |
| Largest diff. peak and hole       | 0.331 and -0.449 e.Å <sup>-3</sup> |

Table 2. Atomic coordinates (x 10<sup>4</sup>) and equivalent isotropic displacement parameters (Å<sup>2</sup>x 10<sup>3</sup>) for mo\_191113lt\_0m. U(eq) is defined as one third of the trace of the orthogonalized U<sup>ij</sup> tensor.

|       | x        | y        | z        | U(eq) |
|-------|----------|----------|----------|-------|
| S(1)  | 9558(1)  | 1453(1)  | 1218(1)  | 16(1) |
| O(1)  | 5477(1)  | 989(1)   | -700(1)  | 17(1) |
| O(2)  | 9638(1)  | 2879(1)  | 975(1)   | 21(1) |
| O(3)  | 10527(1) | 520(1)   | 1237(1)  | 21(1) |
| N(1)  | 8583(1)  | 590(1)   | 764(1)   | 15(1) |
| N(2)  | 7128(1)  | 2244(1)  | 942(1)   | 15(1) |
| C(1)  | 5384(2)  | -2050(2) | -2620(1) | 28(1) |
| C(2)  | 4594(1)  | -1207(2) | -2347(1) | 24(1) |
| C(3)  | 4874(1)  | -538(2)  | -1785(1) | 20(1) |
| C(4)  | 5957(1)  | -698(2)  | -1494(1) | 16(1) |
| C(5)  | 6258(1)  | 0(2)     | -902(1)  | 16(1) |
| C(6)  | 7161(1)  | -123(2)  | -487(1)  | 16(1) |
| C(7)  | 6953(1)  | 833(2)   | 12(1)    | 15(1) |
| C(8)  | 7524(1)  | 1269(2)  | 582(1)   | 14(1) |
| C(9)  | 9101(1)  | 1553(2)  | 1974(1)  | 17(1) |
| C(10) | 8588(1)  | 2801(2)  | 2174(1)  | 18(1) |
| C(11) | 8270(1)  | 2872(2)  | 2776(1)  | 20(1) |
| C(12) | 8447(1)  | 1712(2)  | 3180(1)  | 20(1) |
| C(13) | 8087(1)  | 1815(2)  | 3832(1)  | 26(1) |
| C(14) | 6095(1)  | 2883(2)  | 772(1)   | 15(1) |
| C(15) | 5663(1)  | 3899(2)  | 1177(1)  | 18(1) |
| C(16) | 4622(1)  | 4517(2)  | 1042(1)  | 21(1) |
| C(17) | 3968(1)  | 4158(2)  | 493(1)   | 21(1) |
| C(18) | 4361(1)  | 3175(2)  | 90(1)    | 18(1) |
| C(19) | 5428(1)  | 2522(2)  | 223(1)   | 15(1) |
| C(20) | 5924(1)  | 1481(2)  | -143(1)  | 15(1) |
| C(21) | 6456(2)  | -2230(2) | -2329(1) | 28(1) |



|       |         |          |          |       |
|-------|---------|----------|----------|-------|
| C(22) | 6747(1) | -1553(2) | -1769(1) | 22(1) |
| C(23) | 8571(1) | -974(2)  | 795(1)   | 15(1) |
| C(24) | 7881(1) | -1653(2) | 1195(1)  | 19(1) |
| C(25) | 7834(1) | -3146(2) | 1205(1)  | 24(1) |
| C(26) | 8463(1) | -3949(2) | 812(1)   | 25(1) |
| C(27) | 9156(1) | -3259(2) | 417(1)   | 24(1) |
| C(28) | 9219(1) | -1765(2) | 409(1)   | 20(1) |
| C(29) | 9292(1) | 385(2)   | 2367(1)  | 21(1) |
| C(30) | 8957(1) | 473(2)   | 2969(1)  | 23(1) |

Table 3. Bond lengths [Å] and angles [°] for mo\_191113lt\_0m.

|            |            |
|------------|------------|
| S(1)-O(2)  | 1.4298(11) |
| S(1)-O(3)  | 1.4338(10) |
| S(1)-N(1)  | 1.6655(12) |
| S(1)-C(9)  | 1.7640(14) |
| O(1)-C(20) | 1.3633(16) |
| O(1)-C(5)  | 1.3940(17) |
| N(1)-C(8)  | 1.4307(17) |
| N(1)-C(23) | 1.4538(18) |
| N(2)-C(8)  | 1.3034(18) |
| N(2)-C(14) | 1.3825(18) |
| C(1)-C(2)  | 1.383(2)   |
| C(1)-C(21) | 1.385(2)   |
| C(1)-H(1)  | 0.9500     |
| C(2)-C(3)  | 1.386(2)   |
| C(2)-H(10) | 0.9500     |
| C(3)-C(4)  | 1.393(2)   |
| C(3)-H(7)  | 0.9500     |
| C(4)-C(22) | 1.393(2)   |
| C(4)-C(5)  | 1.4596(19) |
| C(5)-C(6)  | 1.3507(19) |
| C(6)-C(7)  | 1.4329(19) |
| C(6)-H(6)  | 0.9500     |
| C(7)-C(20) | 1.3768(19) |
| C(7)-C(8)  | 1.4239(19) |
| C(9)-C(29) | 1.388(2)   |
| C(9)-C(10) | 1.391(2)   |

|             |            |
|-------------|------------|
| C(10)-C(11) | 1.385(2)   |
| C(10)-H(5)  | 0.9500     |
| C(11)-C(12) | 1.395(2)   |
| C(11)-H(4)  | 0.9500     |
| C(12)-C(30) | 1.390(2)   |
| C(12)-C(13) | 1.508(2)   |
| C(13)-H(22) | 0.9800     |
| C(13)-H(3)  | 0.9800     |
| C(13)-H(2)  | 0.9800     |
| C(14)-C(15) | 1.410(2)   |
| C(14)-C(19) | 1.4198(19) |
| C(15)-C(16) | 1.370(2)   |
| C(15)-H(14) | 0.9500     |
| C(16)-C(17) | 1.411(2)   |
| C(16)-H(13) | 0.9500     |
| C(17)-C(18) | 1.367(2)   |
| C(17)-H(12) | 0.9500     |
| C(18)-C(19) | 1.410(2)   |
| C(18)-H(11) | 0.9500     |
| C(19)-C(20) | 1.405(2)   |
| C(21)-C(22) | 1.388(2)   |
| C(21)-H(9)  | 0.9500     |
| C(22)-H(8)  | 0.9500     |
| C(23)-C(24) | 1.384(2)   |
| C(23)-C(28) | 1.384(2)   |
| C(24)-C(25) | 1.387(2)   |
| C(24)-H(15) | 0.9500     |
| C(25)-C(26) | 1.386(2)   |
| C(25)-H(19) | 0.9500     |
| C(26)-C(27) | 1.385(2)   |
| C(26)-H(18) | 0.9500     |
| C(27)-C(28) | 1.388(2)   |
| C(27)-H(16) | 0.9500     |
| C(28)-H(17) | 0.9500     |
| C(29)-C(30) | 1.393(2)   |
| C(29)-H(21) | 0.9500     |
| C(30)-H(20) | 0.9500     |

|                  |            |
|------------------|------------|
| O(2)-S(1)-O(3)   | 119.69(6)  |
| O(2)-S(1)-N(1)   | 106.76(6)  |
| O(3)-S(1)-N(1)   | 104.13(6)  |
| O(2)-S(1)-C(9)   | 109.02(7)  |
| O(3)-S(1)-C(9)   | 107.57(6)  |
| N(1)-S(1)-C(9)   | 109.28(6)  |
| C(20)-O(1)-C(5)  | 105.96(10) |
| C(8)-N(1)-C(23)  | 116.17(11) |
| C(8)-N(1)-S(1)   | 120.38(9)  |
| C(23)-N(1)-S(1)  | 117.48(9)  |
| C(8)-N(2)-C(14)  | 119.13(12) |
| C(2)-C(1)-C(21)  | 119.79(14) |
| C(2)-C(1)-H(1)   | 120.1      |
| C(21)-C(1)-H(1)  | 120.1      |
| C(1)-C(2)-C(3)   | 120.20(14) |
| C(1)-C(2)-H(10)  | 119.9      |
| C(3)-C(2)-H(10)  | 119.9      |
| C(2)-C(3)-C(4)   | 120.33(14) |
| C(2)-C(3)-H(7)   | 119.8      |
| C(4)-C(3)-H(7)   | 119.8      |
| C(22)-C(4)-C(3)  | 119.26(13) |
| C(22)-C(4)-C(5)  | 120.07(13) |
| C(3)-C(4)-C(5)   | 120.66(13) |
| C(6)-C(5)-O(1)   | 110.89(12) |
| C(6)-C(5)-C(4)   | 132.87(13) |
| O(1)-C(5)-C(4)   | 116.24(12) |
| C(5)-C(6)-C(7)   | 106.27(12) |
| C(5)-C(6)-H(6)   | 126.9      |
| C(7)-C(6)-H(6)   | 126.9      |
| C(20)-C(7)-C(8)  | 116.25(12) |
| C(20)-C(7)-C(6)  | 106.45(12) |
| C(8)-C(7)-C(6)   | 137.27(13) |
| N(2)-C(8)-C(7)   | 123.25(13) |
| N(2)-C(8)-N(1)   | 119.04(12) |
| C(7)-C(8)-N(1)   | 117.71(12) |
| C(29)-C(9)-C(10) | 120.94(13) |
| C(29)-C(9)-S(1)  | 118.87(11) |
| C(10)-C(9)-S(1)  | 120.17(11) |

|                   |            |
|-------------------|------------|
| C(11)-C(10)-C(9)  | 119.15(14) |
| C(11)-C(10)-H(5)  | 120.4      |
| C(9)-C(10)-H(5)   | 120.4      |
| C(10)-C(11)-C(12) | 121.10(14) |
| C(10)-C(11)-H(4)  | 119.5      |
| C(12)-C(11)-H(4)  | 119.5      |
| C(30)-C(12)-C(11) | 118.75(13) |
| C(30)-C(12)-C(13) | 121.23(14) |
| C(11)-C(12)-C(13) | 120.03(14) |
| C(12)-C(13)-H(22) | 109.5      |
| C(12)-C(13)-H(3)  | 109.5      |
| H(22)-C(13)-H(3)  | 109.5      |
| C(12)-C(13)-H(2)  | 109.5      |
| H(22)-C(13)-H(2)  | 109.5      |
| H(3)-C(13)-H(2)   | 109.5      |
| N(2)-C(14)-C(15)  | 118.25(12) |
| N(2)-C(14)-C(19)  | 123.29(13) |
| C(15)-C(14)-C(19) | 118.40(13) |
| C(16)-C(15)-C(14) | 120.41(13) |
| C(16)-C(15)-H(14) | 119.8      |
| C(14)-C(15)-H(14) | 119.8      |
| C(15)-C(16)-C(17) | 120.75(14) |
| C(15)-C(16)-H(13) | 119.6      |
| C(17)-C(16)-H(13) | 119.6      |
| C(18)-C(17)-C(16) | 120.39(13) |
| C(18)-C(17)-H(12) | 119.8      |
| C(16)-C(17)-H(12) | 119.8      |
| C(17)-C(18)-C(19) | 119.71(13) |
| C(17)-C(18)-H(11) | 120.1      |
| C(19)-C(18)-H(11) | 120.1      |
| C(20)-C(19)-C(18) | 125.73(13) |
| C(20)-C(19)-C(14) | 113.92(12) |
| C(18)-C(19)-C(14) | 120.34(13) |
| O(1)-C(20)-C(7)   | 110.43(12) |
| O(1)-C(20)-C(19)  | 125.44(12) |
| C(7)-C(20)-C(19)  | 124.12(12) |
| C(1)-C(21)-C(22)  | 120.36(15) |
| C(1)-C(21)-H(9)   | 119.8      |

|                   |            |
|-------------------|------------|
| C(22)-C(21)-H(9)  | 119.8      |
| C(21)-C(22)-C(4)  | 120.05(14) |
| C(21)-C(22)-H(8)  | 120.0      |
| C(4)-C(22)-H(8)   | 120.0      |
| C(24)-C(23)-C(28) | 120.88(13) |
| C(24)-C(23)-N(1)  | 119.44(13) |
| C(28)-C(23)-N(1)  | 119.64(13) |
| C(23)-C(24)-C(25) | 119.43(14) |
| C(23)-C(24)-H(15) | 120.3      |
| C(25)-C(24)-H(15) | 120.3      |
| C(26)-C(25)-C(24) | 120.19(15) |
| C(26)-C(25)-H(19) | 119.9      |
| C(24)-C(25)-H(19) | 119.9      |
| C(27)-C(26)-C(25) | 119.90(14) |
| C(27)-C(26)-H(18) | 120.1      |
| C(25)-C(26)-H(18) | 120.1      |
| C(26)-C(27)-C(28) | 120.28(15) |
| C(26)-C(27)-H(16) | 119.9      |
| C(28)-C(27)-H(16) | 119.9      |
| C(23)-C(28)-C(27) | 119.30(15) |
| C(23)-C(28)-H(17) | 120.3      |
| C(27)-C(28)-H(17) | 120.3      |
| C(9)-C(29)-C(30)  | 119.05(14) |
| C(9)-C(29)-H(21)  | 120.5      |
| C(30)-C(29)-H(21) | 120.5      |
| C(12)-C(30)-C(29) | 121.01(14) |
| C(12)-C(30)-H(20) | 119.5      |
| C(29)-C(30)-H(20) | 119.5      |

---

Symmetry transformations used to generate equivalent atoms:

Table 4. Anisotropic displacement parameters ( $\text{\AA}^2 \times 10^3$ ) for mo\_191113lt\_0m. The anisotropic

displacement factor exponent takes the form:  $-2\pi^2 [ h^2 a^{*2} U^{11} + \dots + 2 h k a^* b^* U^{12} ]$

---

|      | $U^{11}$ | $U^{22}$ | $U^{33}$ | $U^{23}$ | $U^{13}$ | $U^{12}$ |
|------|----------|----------|----------|----------|----------|----------|
| S(1) | 14(1)    | 16(1)    | 17(1)    | -2(1)    | 1(1)     | 0(1)     |
| O(1) | 17(1)    | 18(1)    | 15(1)    | -3(1)    | 0(1)     | 1(1)     |

---

|       |       |       |       |       |       |       |
|-------|-------|-------|-------|-------|-------|-------|
| O(2)  | 21(1) | 18(1) | 23(1) | -1(1) | 4(1)  | -3(1) |
| O(3)  | 15(1) | 24(1) | 24(1) | -3(1) | 1(1)  | 3(1)  |
| N(1)  | 15(1) | 14(1) | 16(1) | -1(1) | -1(1) | 1(1)  |
| N(2)  | 17(1) | 14(1) | 15(1) | 1(1)  | 1(1)  | 1(1)  |
| C(1)  | 42(1) | 23(1) | 17(1) | -4(1) | -3(1) | -3(1) |
| C(2)  | 28(1) | 23(1) | 21(1) | 2(1)  | -6(1) | -4(1) |
| C(3)  | 22(1) | 18(1) | 20(1) | 1(1)  | 1(1)  | -2(1) |
| C(4)  | 20(1) | 14(1) | 15(1) | 0(1)  | 1(1)  | -3(1) |
| C(5)  | 18(1) | 14(1) | 18(1) | 0(1)  | 4(1)  | -1(1) |
| C(6)  | 16(1) | 15(1) | 17(1) | 0(1)  | 2(1)  | 0(1)  |
| C(7)  | 17(1) | 14(1) | 15(1) | 1(1)  | 3(1)  | -1(1) |
| C(8)  | 16(1) | 13(1) | 15(1) | 3(1)  | 2(1)  | -1(1) |
| C(9)  | 14(1) | 20(1) | 15(1) | -2(1) | -1(1) | -1(1) |
| C(10) | 19(1) | 16(1) | 20(1) | -2(1) | -1(1) | -1(1) |
| C(11) | 18(1) | 19(1) | 22(1) | -6(1) | 2(1)  | 0(1)  |
| C(12) | 15(1) | 26(1) | 19(1) | -3(1) | 0(1)  | -5(1) |
| C(13) | 26(1) | 33(1) | 21(1) | -4(1) | 5(1)  | -4(1) |
| C(14) | 17(1) | 13(1) | 16(1) | 2(1)  | 3(1)  | 0(1)  |
| C(15) | 21(1) | 17(1) | 16(1) | -1(1) | 1(1)  | -1(1) |
| C(16) | 23(1) | 18(1) | 21(1) | -3(1) | 5(1)  | 4(1)  |
| C(17) | 17(1) | 21(1) | 25(1) | 0(1)  | 2(1)  | 5(1)  |
| C(18) | 18(1) | 19(1) | 18(1) | 1(1)  | 0(1)  | 1(1)  |
| C(19) | 17(1) | 13(1) | 16(1) | 2(1)  | 3(1)  | -1(1) |
| C(20) | 17(1) | 15(1) | 14(1) | 0(1)  | 0(1)  | -3(1) |
| C(21) | 36(1) | 27(1) | 21(1) | -6(1) | 4(1)  | 5(1)  |
| C(22) | 22(1) | 24(1) | 20(1) | -3(1) | 2(1)  | 0(1)  |
| C(23) | 16(1) | 13(1) | 16(1) | 0(1)  | -2(1) | 1(1)  |
| C(24) | 18(1) | 21(1) | 19(1) | 0(1)  | 0(1)  | 2(1)  |
| C(25) | 24(1) | 22(1) | 25(1) | 6(1)  | -1(1) | -2(1) |
| C(26) | 28(1) | 14(1) | 31(1) | 2(1)  | -7(1) | 1(1)  |
| C(27) | 27(1) | 20(1) | 26(1) | -4(1) | -1(1) | 7(1)  |
| C(28) | 21(1) | 20(1) | 21(1) | 0(1)  | 2(1)  | 2(1)  |
| C(29) | 23(1) | 20(1) | 21(1) | -2(1) | -2(1) | 6(1)  |
| C(30) | 26(1) | 23(1) | 21(1) | 3(1)  | -2(1) | 2(1)  |

---

Table 5. Hydrogen coordinates ( $\times 10^4$ ) and isotropic displacement parameters ( $\text{\AA}^2 \times 10^{-3}$ ) for mo\_191113lt\_0m.

---

|       | x    | y     | z     | U(eq) |
|-------|------|-------|-------|-------|
| H(1)  | 5191 | -2503 | -3006 | 33    |
| H(10) | 3856 | -1086 | -2545 | 29    |
| H(7)  | 4326 | 31    | -1597 | 24    |
| H(6)  | 7806 | -722  | -519  | 19    |
| H(5)  | 8457 | 3594  | 1901  | 22    |
| H(4)  | 7925 | 3725  | 2915  | 24    |
| H(22) | 8307 | 932   | 4058  | 40    |
| H(3)  | 7262 | 1934  | 3822  | 40    |
| H(2)  | 8458 | 2645  | 4040  | 40    |
| H(14) | 6096 | 4158  | 1546  | 21    |
| H(13) | 4337 | 5194  | 1320  | 25    |
| H(12) | 3251 | 4601  | 403   | 26    |
| H(11) | 3917 | 2933  | -278  | 22    |
| H(9)  | 6995 | -2821 | -2513 | 33    |
| H(8)  | 7487 | -1673 | -1574 | 27    |
| H(15) | 7444 | -1101 | 1460  | 23    |
| H(19) | 7369 | -3620 | 1482  | 28    |
| H(18) | 8418 | -4971 | 815   | 30    |
| H(16) | 9590 | -3810 | 150   | 29    |
| H(17) | 9703 | -1291 | 142   | 24    |
| H(21) | 9647 | -462  | 2228  | 26    |
| H(20) | 9079 | -325  | 3240  | 28    |

## (7) Computational details

Geometries were optimized using the B3LYP functional, the 6-31G\*\* basis for light atoms, and a double- $z$  contraction of the Los Alamos valence functions and pseudopotentials for gold. Hessians at these geometries provided the zero-point energy and vibrational enthalpy and entropy. Solvation free energies  $G_{\text{solv}}$  were computed in toluene with the CPCM continuum model. The electronic energy  $E_{\text{elec}}$  was evaluated with the same functional and the 6-311++G\*\* basis and a triple- $z$  contraction of the Los Alamos valence functions augmented with diffuse  $s$  and  $p$  functions for gold. Gibbs

free energies of organometallic species were computed according to the following equation:

$$G = E_{\text{elec}} + G_{\text{solv}} + \text{ZPE} + H_{\text{vib}} + 4kT - TS_{\text{vib}}$$

| Species                  | $E_{\text{elec}}$ | $G_{\text{solv}}$ | $\text{ZPE} + H_{\text{vib}} + 4kT - TS_{\text{vib}}$ | $G_{\text{total}}(\text{hartree})$ |
|--------------------------|-------------------|-------------------|-------------------------------------------------------|------------------------------------|
| <b>Benzo[c]isoxazole</b> | -399.7682573      | -0.0037519        | 0.075015                                              | -399.6969942                       |
| <b>A</b>                 | -2745.511509      | -0.029182         | 0.660579                                              | -2744.880112                       |
| <b>B</b>                 | -3145.293387      | -0.032221         | 0.764975                                              | -3144.560633                       |
| <b>C</b>                 | -3145.332874      | -0.029353         | 0.761860                                              | -3144.600367                       |
| <b>D</b>                 | -3145.314195      | -0.029420         | 0.765701                                              | -3144.577915                       |
| <b>E</b>                 | -1890.039061      | -0.009762         | 0.378476                                              | -1889.670347                       |
| <b>F</b>                 | -3145.322372      | -0.033609         | 0.763922                                              | -3144.592059                       |
| <b>TS<sub>AB</sub></b>   | -3145.273587      | -0.0293272        | 0.760904                                              | -3144.542011                       |
| <b>TS<sub>BC</sub></b>   | -3145.288236      | -0.0308428        | 0.762569                                              | -3144.55651                        |
| <b>TS<sub>CD</sub></b>   | -3145.31417       | -0.02917868       | 0.766278                                              | -3144.577071                       |
| <b>TS<sub>CF</sub></b>   | -3145.302886      | -0.0324847        | 0.762336                                              | -3144.573035                       |
| <b>1a</b>                | -1490.19882       | -0.0071132        | 0.276072                                              | -1489.929862                       |

### Coordinates of optimized structures

#### Benzo[c]isoxazole

|   |             |             |            |
|---|-------------|-------------|------------|
| C | 0.00000000  | -0.75787300 | 0.00000000 |
| C | -0.53956500 | 0.57933900  | 0.00000000 |
| C | 0.32802300  | 1.71036900  | 0.00000000 |
| C | 1.67700400  | 1.47978000  | 0.00000000 |
| C | 2.21382200  | 0.14594700  | 0.00000000 |
| C | 1.41371300  | -0.96388300 | 0.00000000 |
| C | -1.89701400 | 0.36104000  | 0.00000000 |
| H | -0.07308100 | 2.71885400  | 0.00000000 |
| H | 2.36862400  | 2.31650600  | 0.00000000 |
| H | 3.29330200  | 0.02617600  | 0.00000000 |
| H | 1.81836700  | -1.96978900 | 0.00000000 |
| H | -2.76326500 | 1.00606700  | 0.00000000 |
| O | -2.14352000 | -0.95463800 | 0.00000000 |
| N | -0.95309600 | -1.68414700 | 0.00000000 |

#### A

|   |             |             |             |
|---|-------------|-------------|-------------|
| C | -1.74271100 | -0.00490200 | -0.42952000 |
| C | -0.82602500 | 0.89093900  | -0.51958300 |



|    |             |             |             |
|----|-------------|-------------|-------------|
| C  | -0.84299400 | 2.26860800  | -0.71759600 |
| C  | -0.78870700 | 3.47391000  | -0.89842500 |
| N  | -2.56854600 | -0.97067000 | -0.30294200 |
| C  | -3.13535700 | -1.69412500 | -1.42528800 |
| C  | -2.88647000 | -3.06186300 | -1.56577900 |
| C  | -3.92096000 | -0.99676500 | -2.34702200 |
| C  | -3.43775200 | -3.73533300 | -2.65672500 |
| H  | -2.28125700 | -3.58230600 | -0.83333900 |
| C  | -4.45540900 | -1.68173000 | -3.43720100 |
| H  | -4.10435600 | 0.06397500  | -2.20877900 |
| C  | -4.21718800 | -3.04964200 | -3.59099200 |
| H  | -3.25057600 | -4.79757000 | -2.77778200 |
| H  | -5.06116200 | -1.14718600 | -4.16189400 |
| H  | -4.63837300 | -3.58045800 | -4.43894800 |
| S  | -3.11109800 | -1.43648300 | 1.44650100  |
| O  | -2.91677000 | -2.88141200 | 1.51225700  |
| O  | -2.36052800 | -0.49261300 | 2.26484000  |
| C  | -4.83690800 | -1.04327700 | 1.44536500  |
| C  | -5.76315000 | -2.03937300 | 1.12010300  |
| C  | -5.23564000 | 0.25679600  | 1.77614700  |
| C  | -7.11659700 | -1.71544000 | 1.13134900  |
| H  | -5.42951000 | -3.04241400 | 0.88037700  |
| C  | -6.59437700 | 0.55270200  | 1.77985800  |
| H  | -4.49920900 | 1.00702900  | 2.04241200  |
| C  | -7.55433900 | -0.42275800 | 1.46053600  |
| H  | -7.84654300 | -2.48111600 | 0.88580400  |
| H  | -6.91832900 | 1.55549700  | 2.04265600  |
| C  | -9.02496400 | -0.09567900 | 1.50398900  |
| H  | -9.59689500 | -0.72551300 | 0.81775300  |
| H  | -9.42436300 | -0.26285400 | 2.51178900  |
| H  | -9.21090400 | 0.95128200  | 1.24995500  |
| Au | 1.07047800  | -0.10801900 | -0.36742700 |
| P  | 3.18720800  | -1.19201000 | -0.47743200 |
| C  | 4.05502600  | -0.50191100 | -2.04334300 |
| C  | 2.83922300  | -3.08584100 | -0.51794300 |
| C  | 4.34689100  | -0.87624900 | 0.93188000  |
| C  | 4.07926700  | 0.02729100  | 1.99124600  |
| C  | 5.58297000  | -1.55639800 | 0.92925600  |

|   |             |             |             |
|---|-------------|-------------|-------------|
| C | 5.06528000  | 0.22010500  | 2.97622100  |
| C | 2.81801600  | 0.81020400  | 2.19255200  |
| C | 6.53764600  | -1.36072100 | 1.92250900  |
| H | 5.81593900  | -2.24805800 | 0.13162000  |
| C | 6.27913900  | -0.45885300 | 2.95267100  |
| H | 4.85309800  | 0.91546900  | 3.78227600  |
| C | 2.78607600  | 2.18266800  | 1.90110700  |
| C | 1.70657600  | 0.22591500  | 2.82178500  |
| H | 7.47524600  | -1.90645700 | 1.88478900  |
| H | 7.01281500  | -0.28783200 | 3.73444900  |
| C | 1.66390500  | 2.94984300  | 2.22010500  |
| H | 3.65057800  | 2.65059700  | 1.43867800  |
| C | 0.58566100  | 0.99475200  | 3.14326400  |
| H | 1.73210300  | -0.82833000 | 3.08178700  |
| C | 0.56382800  | 2.35826600  | 2.84356400  |
| H | 1.65401300  | 4.01135500  | 1.99092300  |
| H | -0.26747600 | 0.52647700  | 3.62240800  |
| H | -0.30384900 | 2.95818300  | 3.10034900  |
| C | -0.74992300 | 4.88023700  | -1.10307700 |
| C | 0.48701200  | 5.55196000  | -1.20095800 |
| C | -1.94549900 | 5.62151800  | -1.20962100 |
| C | 0.52172900  | 6.92866200  | -1.39914100 |
| H | 1.40688100  | 4.98164300  | -1.12199500 |
| C | -1.89994200 | 6.99780100  | -1.40764100 |
| H | -2.89721900 | 5.10550600  | -1.13572300 |
| C | -0.66903700 | 7.65353100  | -1.50255800 |
| H | 1.47699000  | 7.43897000  | -1.47448800 |
| H | -2.82393000 | 7.56188900  | -1.48898300 |
| H | -0.63785100 | 8.72768700  | -1.65762900 |
| C | 3.21100400  | -0.86046200 | -3.28330800 |
| H | 2.15924300  | -0.58258000 | -3.16230100 |
| H | 3.60282600  | -0.31091400 | -4.14655100 |
| H | 3.26518300  | -1.92507400 | -3.52667900 |
| C | 4.07159300  | 1.03344900  | -1.86688700 |
| H | 3.06226600  | 1.45082600  | -1.80250000 |
| H | 4.62794900  | 1.33571100  | -0.97465200 |
| H | 4.56690200  | 1.48224900  | -2.73535800 |
| C | 5.50552700  | -0.97638500 | -2.25845800 |

|   |            |             |             |
|---|------------|-------------|-------------|
| H | 5.59372500 | -2.06078200 | -2.35251800 |
| H | 5.87170200 | -0.53988000 | -3.19462500 |
| H | 6.17072700 | -0.63791300 | -1.46188900 |
| C | 1.58328400 | -3.34339100 | -1.38053300 |
| H | 0.70688400 | -2.81977900 | -0.98903000 |
| H | 1.71647500 | -3.04891600 | -2.42338300 |
| H | 1.36739400 | -4.41788400 | -1.36529500 |
| C | 3.98434700 | -3.95901400 | -1.06704300 |
| H | 4.89964900 | -3.88696600 | -0.47747700 |
| H | 3.66604700 | -5.00707300 | -1.02868900 |
| H | 4.21735900 | -3.73252400 | -2.11032800 |
| C | 2.52285100 | -3.49710500 | 0.93620100  |
| H | 3.39167900 | -3.40514200 | 1.59196800  |
| H | 1.70665200 | -2.90072400 | 1.35760500  |
| H | 2.20397600 | -4.54541500 | 0.94485000  |

**B**

|   |             |             |             |
|---|-------------|-------------|-------------|
| C | -1.76093600 | 0.65428800  | -0.56129700 |
| C | -0.43940400 | 0.99913700  | -0.53471000 |
| C | -0.07933400 | 2.35507300  | -0.64423200 |
| C | 0.29665700  | 3.51346400  | -0.75346200 |
| N | -2.34735100 | -0.62954300 | -0.49924100 |
| C | -2.63911700 | -1.34710200 | -1.72052000 |
| C | -1.60582900 | -1.75047100 | -2.57455200 |
| C | -3.97160200 | -1.60621400 | -2.06144000 |
| C | -1.90962000 | -2.41181200 | -3.76374900 |
| H | -0.57843700 | -1.53347600 | -2.30286900 |
| C | -4.26781200 | -2.27873800 | -3.24812500 |
| H | -4.76554600 | -1.28209200 | -1.39710400 |
| C | -3.23869900 | -2.68123600 | -4.10072600 |
| H | -1.10737600 | -2.72169300 | -4.42677400 |
| H | -5.30245200 | -2.48085300 | -3.50825300 |
| H | -3.47061600 | -3.19994900 | -5.02596700 |
| S | -2.23587300 | -1.50170700 | 0.98475900  |
| O | -1.28055200 | -2.60472300 | 0.83345500  |
| O | -2.03721200 | -0.46942300 | 2.01158600  |
| C | -3.85366600 | -2.22864000 | 1.20752700  |
| C | -4.03969800 | -3.58353100 | 0.92975100  |

|    |             |             |             |
|----|-------------|-------------|-------------|
| C  | -4.90129600 | -1.43968000 | 1.69126700  |
| C  | -5.29865100 | -4.14686200 | 1.13025000  |
| H  | -3.20915200 | -4.18007100 | 0.57041800  |
| C  | -6.15132500 | -2.02071600 | 1.88270700  |
| H  | -4.73567000 | -0.39402600 | 1.92749700  |
| C  | -6.37135000 | -3.38065100 | 1.60762900  |
| H  | -5.44858200 | -5.20106600 | 0.91502700  |
| H  | -6.96917100 | -1.41411100 | 2.26203500  |
| C  | -7.72079600 | -4.00798800 | 1.85463200  |
| H  | -7.89301500 | -4.86200600 | 1.19415700  |
| H  | -7.79436900 | -4.37300900 | 2.88633600  |
| H  | -8.53141200 | -3.28913800 | 1.70582700  |
| Au | 1.17863000  | -0.29427000 | -0.32958700 |
| P  | 3.12837300  | -1.71461400 | -0.36901000 |
| C  | 3.89204200  | -1.44443100 | -2.12612700 |
| C  | 2.63508300  | -3.53527900 | -0.00750600 |
| C  | 4.47920800  | -1.30219800 | 0.84062200  |
| C  | 4.38891900  | -0.29210000 | 1.83424500  |
| C  | 5.70106100  | -1.99533000 | 0.71075200  |
| C  | 5.52594600  | -0.01855500 | 2.61974900  |
| C  | 3.18740600  | 0.53481000  | 2.16669300  |
| C  | 6.80839400  | -1.71489900 | 1.50539000  |
| H  | 5.79845900  | -2.77369400 | -0.03230600 |
| C  | 6.72188200  | -0.71066300 | 2.46664500  |
| H  | 5.44599500  | 0.75110000  | 3.38094400  |
| C  | 3.25265500  | 1.93090100  | 2.02382700  |
| C  | 2.04959000  | -0.02481800 | 2.76918000  |
| H  | 7.72743900  | -2.27636400 | 1.36862600  |
| H  | 7.57293700  | -0.47232900 | 3.09738200  |
| C  | 2.20751500  | 2.74325100  | 2.46368300  |
| H  | 4.13550100  | 2.37757000  | 1.57491600  |
| C  | 1.00408800  | 0.78818900  | 3.21269600  |
| H  | 1.99358400  | -1.09703700 | 2.91932500  |
| C  | 1.08276900  | 2.17335500  | 3.06321900  |
| H  | 2.27594200  | 3.82043300  | 2.34338600  |
| H  | 0.13116700  | 0.33265100  | 3.66845500  |
| H  | 0.27573800  | 2.80790500  | 3.41812400  |
| C  | 0.77470200  | 4.84795000  | -0.87263300 |

|   |             |             |             |
|---|-------------|-------------|-------------|
| C | 2.16215300  | 5.10745300  | -0.87392000 |
| C | -0.12166700 | 5.93064900  | -0.99115900 |
| C | 2.63241500  | 6.41182900  | -0.99198000 |
| H | 2.85295700  | 4.27576300  | -0.78291700 |
| C | 0.35709000  | 7.23196800  | -1.10699600 |
| H | -1.18948400 | 5.73537700  | -0.98900100 |
| C | 1.73340500  | 7.47585000  | -1.10846800 |
| H | 3.70146800  | 6.60140100  | -0.99420500 |
| H | -0.34083800 | 8.05886200  | -1.19728500 |
| H | 2.10416800  | 8.49217200  | -1.20047200 |
| C | 2.74138400  | -1.35059100 | -3.15472200 |
| H | 2.05507100  | -0.53141200 | -2.92476000 |
| H | 3.17386700  | -1.15993300 | -4.14393200 |
| H | 2.16145600  | -2.27399100 | -3.22249600 |
| C | 4.60707100  | -0.07654700 | -2.07813900 |
| H | 3.93987400  | 0.71631300  | -1.72332100 |
| H | 5.49151200  | -0.09421500 | -1.43730700 |
| H | 4.92959100  | 0.18941500  | -3.09137300 |
| C | 4.87568900  | -2.52190800 | -2.62192300 |
| H | 4.39925300  | -3.49881000 | -2.73479600 |
| H | 5.23899000  | -2.22580500 | -3.61300900 |
| H | 5.75480000  | -2.63055800 | -1.98516500 |
| C | 1.60015400  | -3.98610100 | -1.05774200 |
| H | 0.74980500  | -3.30193500 | -1.11540200 |
| H | 2.04062100  | -4.09784100 | -2.05262800 |
| H | 1.20966700  | -4.96733200 | -0.76469800 |
| C | 3.79691300  | -4.54722800 | 0.03026700  |
| H | 4.49246700  | -4.34320000 | 0.84667500  |
| H | 3.37378800  | -5.54245400 | 0.20927000  |
| H | 4.35800400  | -4.59917200 | -0.90476600 |
| C | 1.96572200  | -3.52593400 | 1.38417600  |
| H | 2.66407900  | -3.20671900 | 2.16406900  |
| H | 1.07441000  | -2.89548300 | 1.41015000  |
| H | 1.65209400  | -4.54813400 | 1.62629200  |
| C | -3.32491800 | 2.52466800  | 0.22075300  |
| C | -4.12637300 | 3.47392200  | -0.49246300 |
| C | -3.24251400 | 2.52603800  | 1.63318100  |
| C | -3.93919700 | 3.15289400  | -1.82300100 |

|          |             |             |             |
|----------|-------------|-------------|-------------|
| C        | -4.87147700 | 4.46062000  | 0.21467800  |
| C        | -3.97618000 | 3.49569700  | 2.27699000  |
| H        | -2.64264700 | 1.78482500  | 2.14857500  |
| H        | -4.31923200 | 3.56604200  | -2.74758400 |
| C        | -4.78292200 | 4.45580800  | 1.58204200  |
| H        | -5.48232500 | 5.18154300  | -0.31738600 |
| H        | -3.94705300 | 3.53957700  | 3.36145100  |
| H        | -5.33257100 | 5.18938100  | 2.16199000  |
| N        | -2.73133100 | 1.70758700  | -0.66297900 |
| O        | -3.11981200 | 2.11784400  | -1.95641600 |
| <b>C</b> |             |             |             |
| C        | -1.92920000 | 0.41505800  | -0.79789000 |
| C        | -0.71794600 | 0.95980200  | -0.13743300 |
| C        | -0.74331300 | 2.24845100  | 0.28443100  |
| C        | -0.72482700 | 3.42276500  | 0.67459400  |
| N        | -2.55769700 | -0.73883600 | -0.31309700 |
| C        | -3.43846300 | -1.49029400 | -1.17871500 |
| C        | -2.90399100 | -2.44108900 | -2.05243400 |
| C        | -4.81433000 | -1.24907500 | -1.13722000 |
| C        | -3.76131400 | -3.16475600 | -2.88025800 |
| H        | -1.83189500 | -2.59198600 | -2.08857900 |
| C        | -5.66409900 | -1.97541500 | -1.97051100 |
| H        | -5.20746100 | -0.50101200 | -0.45717100 |
| C        | -5.13863300 | -2.93467900 | -2.83900100 |
| H        | -3.35266800 | -3.90431400 | -3.56175400 |
| H        | -6.73347200 | -1.79092200 | -1.94293100 |
| H        | -5.80184800 | -3.49945600 | -3.48721400 |
| S        | -2.12417600 | -1.40642600 | 1.21834100  |
| O        | -1.33119000 | -2.61803200 | 1.00066800  |
| O        | -1.56297600 | -0.26663500 | 1.96255300  |
| C        | -3.67749300 | -1.87039800 | 1.95028300  |
| C        | -4.09012700 | -3.20336700 | 1.89321900  |
| C        | -4.43625300 | -0.89817600 | 2.60905600  |
| C        | -5.29349300 | -3.55767800 | 2.49761600  |
| H        | -3.47677900 | -3.94201700 | 1.39012700  |
| C        | -5.63540200 | -1.27567400 | 3.20540500  |
| H        | -4.08531700 | 0.12656900  | 2.66403700  |

|    |             |             |             |
|----|-------------|-------------|-------------|
| C  | -6.08326500 | -2.60629000 | 3.16068700  |
| H  | -5.62364100 | -4.59162500 | 2.45603500  |
| H  | -6.23149900 | -0.52852200 | 3.72168100  |
| C  | -7.36774600 | -3.00934600 | 3.84020000  |
| H  | -7.83611600 | -3.86075200 | 3.33924100  |
| H  | -7.17746600 | -3.30588700 | 4.87893700  |
| H  | -8.08569300 | -2.18506600 | 3.86311300  |
| Au | 1.06504100  | -0.08852600 | -0.21519900 |
| P  | 3.07488600  | -1.38031700 | -0.58009300 |
| C  | 4.05205300  | -0.49020000 | -1.97182500 |
| C  | 2.49235900  | -3.15824200 | -1.05677900 |
| C  | 4.29392700  | -1.54889700 | 0.81178200  |
| C  | 4.29630000  | -0.75976700 | 1.98952700  |
| C  | 5.33378600  | -2.48633800 | 0.64089000  |
| C  | 5.34229100  | -0.93695900 | 2.91664900  |
| C  | 3.28254700  | 0.26530600  | 2.38855600  |
| C  | 6.34765100  | -2.65738100 | 1.57791100  |
| H  | 5.36497600  | -3.09356700 | -0.25253400 |
| C  | 6.35545200  | -1.86952100 | 2.72659400  |
| H  | 5.33354200  | -0.33048300 | 3.81676300  |
| C  | 3.67379100  | 1.60860600  | 2.50720700  |
| C  | 1.99999600  | -0.10364600 | 2.82537700  |
| H  | 7.12434200  | -3.39561300 | 1.40425000  |
| H  | 7.13813100  | -1.98189100 | 3.47059200  |
| C  | 2.80711600  | 2.55766400  | 3.05030800  |
| H  | 4.67167500  | 1.90227000  | 2.19394100  |
| C  | 1.13536700  | 0.84571000  | 3.37546000  |
| H  | 1.69095600  | -1.14315200 | 2.77133200  |
| C  | 1.53751800  | 2.17682900  | 3.49146200  |
| H  | 3.13689900  | 3.58795900  | 3.15416900  |
| H  | 0.15037400  | 0.53736200  | 3.70682700  |
| H  | 0.87104900  | 2.91022900  | 3.93600800  |
| C  | -0.69504600 | 4.75592800  | 1.11131600  |
| C  | 0.53782700  | 5.36186500  | 1.46283700  |
| C  | -1.89269100 | 5.50959900  | 1.19976200  |
| C  | 0.56426000  | 6.68314800  | 1.88718700  |
| H  | 1.44709400  | 4.77430200  | 1.39821900  |
| C  | -1.85248400 | 6.82902800  | 1.62740500  |

|   |             |             |             |
|---|-------------|-------------|-------------|
| H | -2.83289300 | 5.03984000  | 0.93120000  |
| C | -0.62696600 | 7.41488800  | 1.96937700  |
| H | 1.50674900  | 7.14942800  | 2.15530100  |
| H | -2.76851300 | 7.40653000  | 1.69722100  |
| H | -0.60065800 | 8.44800200  | 2.30280100  |
| C | 3.19813600  | -0.47370100 | -3.25459600 |
| H | 2.18682500  | -0.10010900 | -3.07677300 |
| H | 3.67934800  | 0.18395600  | -3.98808200 |
| H | 3.11676400  | -1.46321400 | -3.71175900 |
| C | 4.25549400  | 0.95994900  | -1.47916600 |
| H | 3.30352700  | 1.47448100  | -1.31685800 |
| H | 4.83002900  | 0.99889100  | -0.54898200 |
| H | 4.81604200  | 1.51620900  | -2.23937600 |
| C | 5.43523800  | -1.09486200 | -2.27890300 |
| H | 5.38169500  | -2.12994200 | -2.62196600 |
| H | 5.89355700  | -0.50996700 | -3.08476800 |
| H | 6.10641100  | -1.04686300 | -1.41894200 |
| C | 1.14450600  | -3.02859200 | -1.80442000 |
| H | 0.36206400  | -2.65627000 | -1.13928300 |
| H | 1.18677700  | -2.37787400 | -2.67973900 |
| H | 0.84276400  | -4.02752000 | -2.14174800 |
| C | 3.45479400  | -3.96491100 | -1.95244700 |
| H | 4.42763100  | -4.15624500 | -1.49676100 |
| H | 3.00002800  | -4.94389600 | -2.14185000 |
| H | 3.61368900  | -3.49257400 | -2.92459700 |
| C | 2.23422100  | -3.92093900 | 0.26056200  |
| H | 3.15069300  | -4.11747500 | 0.82095600  |
| H | 1.53429600  | -3.38285800 | 0.90780300  |
| H | 1.77359000  | -4.88558200 | 0.01893300  |
| C | -1.99150600 | 2.00094200  | -2.65198900 |
| C | -1.16731500 | 1.90554800  | -3.80764000 |
| C | -2.61691800 | 3.23067500  | -2.37426400 |
| C | -0.46273300 | 0.67223100  | -4.18786700 |
| C | -0.99761200 | 3.03260900  | -4.62786300 |
| C | -2.42448700 | 4.33391700  | -3.20213400 |
| H | -3.27888100 | 3.29171600  | -1.51703700 |
| H | 0.02915400  | 0.72988100  | -5.18346900 |
| C | -1.61107500 | 4.24521000  | -4.33593300 |



|   |             |             |             |
|---|-------------|-------------|-------------|
| H | -0.36610900 | 2.94032400  | -5.50845100 |
| H | -2.92176100 | 5.26978300  | -2.96380700 |
| H | -1.46840300 | 5.10534900  | -4.98129500 |
| N | -2.32940200 | 0.88164100  | -1.91644100 |
| O | -0.37459000 | -0.34634800 | -3.51903500 |

**D**

|   |             |             |             |
|---|-------------|-------------|-------------|
| C | -2.16684500 | 0.22424800  | -0.70260200 |
| C | -0.79274600 | 0.92172600  | -0.76853900 |
| C | -0.81492000 | 2.21352300  | -0.17213900 |
| C | -0.81981800 | 3.31906800  | 0.34359800  |
| N | -2.26416200 | -1.14408800 | -0.44502100 |
| C | -3.22481000 | -1.95945700 | -1.15833800 |
| C | -2.73218800 | -2.84974400 | -2.11743800 |
| C | -4.59764900 | -1.87576900 | -0.90237100 |
| C | -3.62052300 | -3.65916200 | -2.82701400 |
| H | -1.66352900 | -2.90283900 | -2.29397300 |
| C | -5.47809200 | -2.68105500 | -1.62372900 |
| H | -4.96415300 | -1.18492100 | -0.15334800 |
| C | -4.99235600 | -3.57286700 | -2.58334600 |
| H | -3.24016200 | -4.35246100 | -3.57075900 |
| H | -6.54472200 | -2.61503800 | -1.43251300 |
| H | -5.68274500 | -4.20000800 | -3.13918800 |
| S | -1.55344600 | -1.82301900 | 1.00284000  |
| O | -0.68240800 | -2.92400100 | 0.59020200  |
| O | -1.04106900 | -0.66822900 | 1.74519600  |
| C | -2.93134400 | -2.51280800 | 1.89721500  |
| C | -3.21832900 | -3.87494200 | 1.77998000  |
| C | -3.67642100 | -1.68000600 | 2.73786200  |
| C | -4.27622300 | -4.40229200 | 2.51538300  |
| H | -2.61798700 | -4.50363900 | 1.13255600  |
| C | -4.73018800 | -2.22920700 | 3.46236400  |
| H | -3.42165800 | -0.63023800 | 2.83421200  |
| C | -5.04689200 | -3.59398200 | 3.36519400  |
| H | -4.50537400 | -5.46074200 | 2.43128500  |
| H | -5.31144500 | -1.59154700 | 4.12243700  |
| C | -6.16779600 | -4.18463600 | 4.18298200  |
| H | -6.62115300 | -5.04344500 | 3.68074900  |

|    |             |             |             |
|----|-------------|-------------|-------------|
| H  | -5.79393200 | -4.53395900 | 5.15319800  |
| H  | -6.95108900 | -3.44824700 | 4.38204700  |
| Au | 1.11205500  | -0.04058400 | -0.52998500 |
| P  | 3.25382700  | -1.08974100 | -0.80622400 |
| C  | 4.17183200  | -0.05279800 | -2.13783700 |
| C  | 2.89758000  | -2.90331300 | -1.38097500 |
| C  | 4.45917300  | -1.17473400 | 0.60771400  |
| C  | 4.41002600  | -0.35106200 | 1.76142900  |
| C  | 5.54476000  | -2.06520100 | 0.47655700  |
| C  | 5.44564800  | -0.46218800 | 2.71055800  |
| C  | 3.36233200  | 0.66014100  | 2.10460800  |
| C  | 6.54938700  | -2.16793800 | 1.43328200  |
| H  | 5.62021600  | -2.69071900 | -0.40095600 |
| C  | 6.50055800  | -1.35517600 | 2.56322500  |
| H  | 5.39584000  | 0.16851500  | 3.59243500  |
| C  | 3.72360200  | 2.01491100  | 2.18911100  |
| C  | 2.07707700  | 0.27897000  | 2.51796000  |
| H  | 7.36206900  | -2.87310300 | 1.28907700  |
| H  | 7.27321600  | -1.41530600 | 3.32365100  |
| C  | 2.82311800  | 2.96471800  | 2.67122600  |
| H  | 4.72380800  | 2.31883900  | 1.89292900  |
| C  | 1.18007700  | 1.22949300  | 3.01034600  |
| H  | 1.78623800  | -0.76609800 | 2.48815900  |
| C  | 1.55050200  | 2.57201500  | 3.09060000  |
| H  | 3.12261300  | 4.00689600  | 2.73682100  |
| H  | 0.19425800  | 0.90992800  | 3.32823300  |
| H  | 0.85458800  | 3.30803300  | 3.48100500  |
| C  | -0.82776300 | 4.61435200  | 0.93411300  |
| C  | 0.34480000  | 5.39827300  | 0.95566000  |
| C  | -2.01293500 | 5.13431900  | 1.49470900  |
| C  | 0.32468200  | 6.67053300  | 1.51957600  |
| H  | 1.25841000  | 4.99440600  | 0.53270300  |
| C  | -2.01935300 | 6.40282700  | 2.06716600  |
| H  | -2.91606300 | 4.53294500  | 1.47509400  |
| C  | -0.85370300 | 7.17403500  | 2.07827000  |
| H  | 1.22963800  | 7.27036000  | 1.52883800  |
| H  | -2.93385400 | 6.79376900  | 2.50269200  |
| H  | -0.86324300 | 8.16484800  | 2.52222300  |

|   |             |             |             |
|---|-------------|-------------|-------------|
| C | 3.34799500  | -0.04887300 | -3.44132500 |
| H | 2.31231800  | 0.26028300  | -3.26803000 |
| H | 3.79919300  | 0.66351500  | -4.14191000 |
| H | 3.34004100  | -1.02488800 | -3.93361600 |
| C | 4.23786300  | 1.38766600  | -1.58417200 |
| H | 3.24282900  | 1.79900400  | -1.39004000 |
| H | 4.81542800  | 1.44188700  | -0.65761600 |
| H | 4.73412300  | 2.02771700  | -2.32310500 |
| C | 5.60938100  | -0.52209700 | -2.43218700 |
| H | 5.65287200  | -1.53038200 | -2.84748400 |
| H | 6.04901500  | 0.15412300  | -3.17462600 |
| H | 6.24204700  | -0.48585000 | -1.54274700 |
| C | 1.57075600  | -2.89491000 | -2.17782600 |
| H | 0.72959600  | -2.60285500 | -1.54662900 |
| H | 1.60432200  | -2.23534400 | -3.04831200 |
| H | 1.38130300  | -3.91297600 | -2.53888400 |
| C | 3.96287900  | -3.56196400 | -2.28294400 |
| H | 4.94736900  | -3.65390500 | -1.82260500 |
| H | 3.62816900  | -4.58033100 | -2.51163300 |
| H | 4.07795500  | -3.04151700 | -3.23670000 |
| C | 2.68106900  | -3.75137600 | -0.10884800 |
| H | 3.59679400  | -3.88072100 | 0.47122400  |
| H | 1.91212800  | -3.31928400 | 0.53782000  |
| H | 2.33050500  | -4.74564700 | -0.40902000 |
| C | -3.41809900 | 2.07870700  | -1.57402600 |
| C | -2.60670400 | 2.59439100  | -2.63988200 |
| C | -4.57653900 | 2.80673300  | -1.21990100 |
| C | -1.41655000 | 1.96407800  | -3.05003400 |
| C | -3.02723000 | 3.75071400  | -3.35887800 |
| C | -4.91184600 | 3.97389100  | -1.88141400 |
| H | -5.20547100 | 2.40733900  | -0.43189800 |
| H | -1.00888600 | 2.19539600  | -4.03827200 |
| C | -4.14603100 | 4.44920600  | -2.97077800 |
| H | -2.42654500 | 4.08982300  | -4.19849100 |
| H | -5.80387500 | 4.51613800  | -1.58197200 |
| H | -4.44801900 | 5.34683400  | -3.49874800 |
| N | -3.25477800 | 0.84838800  | -1.00047200 |
| O | -0.71305100 | 1.11472400  | -2.39990200 |

**E**

|   |             |             |             |
|---|-------------|-------------|-------------|
| C | -1.77935400 | -0.00362600 | -0.33147800 |
| C | -1.39389900 | 1.43852500  | -0.54251100 |
| C | -0.07282000 | 1.89619100  | -0.18502800 |
| C | 0.98517200  | 2.37687400  | 0.16503800  |
| N | -0.73055000 | -0.96647900 | -0.23926500 |
| C | -0.89426800 | -2.06372400 | 0.68884900  |
| C | -1.69638400 | -3.17445700 | 0.40621500  |
| C | -0.21632300 | -1.97409800 | 1.90773400  |
| C | -1.80997400 | -4.19399800 | 1.35036700  |
| H | -2.21396000 | -3.22888500 | -0.54228800 |
| C | -0.34194600 | -2.99408100 | 2.85119600  |
| H | 0.39911600  | -1.10184700 | 2.10217100  |
| C | -1.13722400 | -4.10610300 | 2.57156500  |
| H | -2.43158200 | -5.05752500 | 1.13326000  |
| H | 0.18268400  | -2.92062400 | 3.79912900  |
| H | -1.23412200 | -4.90281100 | 3.30342000  |
| S | 0.13440500  | -1.32591200 | -1.71110800 |
| O | -0.32685400 | -2.61754000 | -2.22808100 |
| O | 0.03480200  | -0.11252000 | -2.52097200 |
| C | 1.82002300  | -1.54632300 | -1.15603100 |
| C | 2.25808900  | -2.81778600 | -0.78095800 |
| C | 2.68275900  | -0.44965600 | -1.14378400 |
| C | 3.57903100  | -2.98045700 | -0.37043000 |
| H | 1.57708600  | -3.65989600 | -0.82084800 |
| C | 4.00036000  | -0.63461300 | -0.73194400 |
| H | 2.32421500  | 0.52340600  | -1.45627100 |
| C | 4.46853700  | -1.89705700 | -0.33982100 |
| H | 3.92582500  | -3.96667500 | -0.07415900 |
| H | 4.67486900  | 0.21674900  | -0.71588200 |
| C | 5.90754500  | -2.09172800 | 0.07205400  |
| H | 6.01299000  | -2.91519900 | 0.78408400  |
| H | 6.53350700  | -2.32975300 | -0.79679400 |
| H | 6.31847900  | -1.18753700 | 0.53009600  |
| C | 2.23709200  | 2.94347900  | 0.55336400  |
| C | 2.72770700  | 4.09339400  | -0.09604700 |
| C | 2.99896200  | 2.36632600  | 1.58795800  |

|          |             |             |             |
|----------|-------------|-------------|-------------|
| C        | 3.94683800  | 4.64794900  | 0.28393100  |
| H        | 2.14433400  | 4.53870100  | -0.89514400 |
| C        | 4.21697300  | 2.92891200  | 1.96071300  |
| H        | 2.62567800  | 1.47966600  | 2.08935500  |
| C        | 4.69503900  | 4.06981200  | 1.31202900  |
| H        | 4.31417600  | 5.53449700  | -0.22432800 |
| H        | 4.79403700  | 2.47641200  | 2.76182100  |
| H        | 5.64473600  | 4.50626000  | 1.60645100  |
| C        | -4.03764000 | 0.50566400  | 0.01197700  |
| C        | -3.86641700 | 1.90563300  | -0.05617700 |
| C        | -5.30574800 | -0.01735700 | 0.30804600  |
| C        | -2.53713200 | 2.42223700  | -0.41752000 |
| C        | -4.94271400 | 2.75204500  | 0.22139900  |
| C        | -6.37781500 | 0.83462900  | 0.55194600  |
| H        | -5.41522000 | -1.09566200 | 0.35297500  |
| H        | -2.28883600 | 3.43921300  | -0.11554100 |
| C        | -6.19664800 | 2.22185400  | 0.52007200  |
| H        | -4.79892600 | 3.82870600  | 0.18187100  |
| H        | -7.35558700 | 0.42073500  | 0.77937400  |
| H        | -7.03231400 | 2.88587300  | 0.71860200  |
| N        | -2.98428200 | -0.39820600 | -0.13668300 |
| O        | -2.00229400 | 2.04666500  | -1.69198800 |
| <b>F</b> |             |             |             |
| C        | 1.30521500  | -1.27551900 | 0.86929900  |
| C        | 0.77328100  | -0.03557500 | 1.43449900  |
| C        | 1.52431600  | 1.18704000  | 1.38574900  |
| C        | 2.18623900  | 2.18990400  | 1.58130200  |
| N        | 2.07049200  | -1.48180700 | -0.24023400 |
| C        | 2.81658800  | -2.72408400 | -0.36044300 |
| C        | 2.30192100  | -3.81854600 | -1.05855000 |
| C        | 4.07840600  | -2.78005200 | 0.23743800  |
| C        | 3.06596100  | -4.98061400 | -1.15442600 |
| H        | 1.32183300  | -3.75698500 | -1.51447100 |
| C        | 4.83137200  | -3.94969100 | 0.14108200  |
| H        | 4.45901600  | -1.91432100 | 0.77012000  |
| C        | 4.32649100  | -5.04874900 | -0.55596900 |
| H        | 2.67031400  | -5.83833500 | -1.68900000 |

|    |             |             |             |
|----|-------------|-------------|-------------|
| H  | 5.80946500  | -4.00029700 | 0.60889400  |
| H  | 4.91248800  | -5.95959900 | -0.62987500 |
| S  | 1.97523000  | -0.51420800 | -1.74510000 |
| O  | 1.48402300  | -1.45456100 | -2.74964000 |
| O  | 1.22057700  | 0.69214000  | -1.41480300 |
| C  | 3.66266100  | -0.09997800 | -2.10170200 |
| C  | 4.42788700  | -0.95936300 | -2.89604200 |
| C  | 4.17314600  | 1.11101500  | -1.62573400 |
| C  | 5.73582000  | -0.59458400 | -3.20127700 |
| H  | 4.00383300  | -1.88387100 | -3.27023700 |
| C  | 5.48260000  | 1.45423700  | -1.94948800 |
| H  | 3.55235600  | 1.77019200  | -1.03001700 |
| C  | 6.28335500  | 0.61239300  | -2.73818400 |
| H  | 6.34018000  | -1.25534400 | -3.81590100 |
| H  | 5.88631500  | 2.39761000  | -1.59304800 |
| C  | 7.68849900  | 1.01193000  | -3.11106500 |
| H  | 8.33736500  | 0.13886300  | -3.22119100 |
| H  | 7.69463400  | 1.54548700  | -4.06935900 |
| H  | 8.12886400  | 1.67742200  | -2.36396200 |
| Au | -1.19692800 | 0.01922600  | 0.31392800  |
| P  | -3.31317000 | -0.47929900 | -0.67436300 |
| C  | -4.52557800 | -0.87911400 | 0.75802100  |
| C  | -2.98484400 | -1.98533300 | -1.84498900 |
| C  | -4.17813300 | 0.83092500  | -1.66409200 |
| C  | -3.88150700 | 2.21592700  | -1.60175500 |
| C  | -5.26118900 | 0.41864000  | -2.46812000 |
| C  | -4.68874900 | 3.10887000  | -2.33352000 |
| C  | -2.77375900 | 2.86335000  | -0.83419800 |
| C  | -6.03477600 | 1.31720400  | -3.19549000 |
| H  | -5.52188000 | -0.62844700 | -2.52134200 |
| C  | -5.74816600 | 2.67852200  | -3.12395500 |
| H  | -4.45168400 | 4.16676500  | -2.28295100 |
| C  | -3.08636600 | 3.74895500  | 0.20929000  |
| C  | -1.43629000 | 2.74852000  | -1.24602800 |
| H  | -6.85548100 | 0.95244200  | -3.80513700 |
| H  | -6.33974000 | 3.39915800  | -3.68018300 |
| C  | -2.08829100 | 4.50630100  | 0.82404100  |
| H  | -4.12089300 | 3.86142900  | 0.52157400  |

|   |             |             |             |
|---|-------------|-------------|-------------|
| C | -0.43986900 | 3.51238300  | -0.63484500 |
| H | -1.17787900 | 2.09380400  | -2.07214600 |
| C | -0.76436600 | 4.39690800  | 0.39503400  |
| H | -2.35058600 | 5.19699100  | 1.62042000  |
| H | 0.58598600  | 3.41567300  | -0.97178900 |
| H | 0.01059400  | 5.00558600  | 0.84923500  |
| C | 2.97676400  | 3.35640400  | 1.81811800  |
| C | 2.41589800  | 4.48661800  | 2.44730900  |
| C | 4.34037000  | 3.38644200  | 1.46083700  |
| C | 3.19329400  | 5.61543800  | 2.69373400  |
| H | 1.37270100  | 4.46313500  | 2.74424600  |
| C | 5.10902600  | 4.52138900  | 1.70688400  |
| H | 4.78864200  | 2.51020100  | 1.00357200  |
| C | 4.53930400  | 5.63966200  | 2.32041900  |
| H | 2.74870100  | 6.47827200  | 3.18046900  |
| H | 6.15849500  | 4.53134600  | 1.42778300  |
| H | 5.14215100  | 6.52167900  | 2.51302700  |
| C | -4.00355500 | -2.09546300 | 1.54735100  |
| H | -2.96513700 | -1.96122100 | 1.86478300  |
| H | -4.61584000 | -2.22012000 | 2.44803200  |
| H | -4.07414200 | -3.02553300 | 0.97767100  |
| C | -4.51912500 | 0.36082500  | 1.67850200  |
| H | -3.52448500 | 0.55943300  | 2.08842300  |
| H | -4.86028500 | 1.25910000  | 1.15676300  |
| H | -5.20406300 | 0.18306900  | 2.51571200  |
| C | -5.97577700 | -1.13897500 | 0.30562200  |
| H | -6.06823800 | -2.00233400 | -0.35566300 |
| H | -6.58214800 | -1.34471300 | 1.19516000  |
| H | -6.41153900 | -0.27085800 | -0.19285400 |
| C | -1.87093500 | -2.85569700 | -1.21725000 |
| H | -0.92185700 | -2.31905100 | -1.16464300 |
| H | -2.11876400 | -3.21505800 | -0.21632400 |
| H | -1.71885700 | -3.73325200 | -1.85604200 |
| C | -4.19149100 | -2.91066900 | -2.11071300 |
| H | -5.03311900 | -2.41675800 | -2.59753200 |
| H | -3.86253200 | -3.70684000 | -2.78801000 |
| H | -4.55351200 | -3.39459800 | -1.20065000 |
| C | -2.45257400 | -1.41392300 | -3.17682100 |

|   |             |             |             |
|---|-------------|-------------|-------------|
| H | -3.21151400 | -0.85333900 | -3.72620600 |
| H | -1.58415800 | -0.76583700 | -3.02246600 |
| H | -2.12514700 | -2.24712100 | -3.80856300 |
| C | 0.46167600  | -2.00048300 | 2.73230600  |
| C | -0.18059000 | -2.83064000 | 3.72424000  |
| C | 0.43493900  | -0.51146200 | 2.88360800  |
| C | -0.02557500 | -4.30785500 | 3.79789000  |
| C | -1.03882800 | -2.20574400 | 4.59658900  |
| C | -0.66013600 | 0.03576600  | 3.73175200  |
| H | 1.35104100  | -0.26687400 | 3.45989400  |
| H | -0.61399300 | -4.76707300 | 4.62379800  |
| C | -1.31998000 | -0.78850400 | 4.57845000  |
| H | -1.56447900 | -2.81989300 | 5.32575300  |
| H | -0.83012300 | 1.10830900  | 3.72777000  |
| H | -2.06249600 | -0.39820900 | 5.26669800  |
| N | 1.03083300  | -2.40229000 | 1.62164100  |
| O | 0.66590700  | -4.97922800 | 3.06549900  |

**TS<sub>AB</sub>**

|   |            |             |             |
|---|------------|-------------|-------------|
| C | 1.55802800 | 0.07938200  | 0.41783200  |
| C | 0.47289700 | 0.82092800  | 0.53165100  |
| C | 0.38397500 | 2.20247300  | 0.73596800  |
| C | 0.18688800 | 3.39506600  | 0.90729800  |
| N | 2.01517900 | -1.15393900 | 0.32461800  |
| C | 2.24227000 | -2.00312600 | 1.47560800  |
| C | 1.59597400 | -3.24095700 | 1.55924600  |
| C | 3.10224600 | -1.57628400 | 2.49192800  |
| C | 1.81981800 | -4.05326200 | 2.67211200  |
| H | 0.93363900 | -3.55796600 | 0.76329600  |
| C | 3.30139300 | -2.39026800 | 3.60673900  |
| H | 3.59995200 | -0.61772700 | 2.41348300  |
| C | 2.66682100 | -3.63068400 | 3.69787300  |
| H | 1.32075400 | -5.01520200 | 2.73902800  |
| H | 3.96244900 | -2.05652700 | 4.40063000  |
| H | 2.83097300 | -4.26370200 | 4.56431300  |
| S | 2.38259600 | -1.79586200 | -1.31560600 |
| O | 1.47236000 | -2.91873000 | -1.54426200 |
| O | 2.34836400 | -0.60758900 | -2.16864400 |



|    |             |             |             |
|----|-------------|-------------|-------------|
| C  | 4.04597000  | -2.40842300 | -1.17581600 |
| C  | 4.25694600  | -3.78207300 | -1.03477800 |
| C  | 5.11360900  | -1.50712300 | -1.23363600 |
| C  | 5.56468700  | -4.25255900 | -0.94725100 |
| H  | 3.41383000  | -4.46224400 | -1.00616500 |
| C  | 6.41075600  | -2.00094600 | -1.14257500 |
| H  | 4.93208800  | -0.44586000 | -1.35996000 |
| C  | 6.65877200  | -3.37626800 | -0.99995000 |
| H  | 5.73824600  | -5.31935800 | -0.83995900 |
| H  | 7.24746000  | -1.30974400 | -1.18998100 |
| C  | 8.07105700  | -3.90097600 | -0.93841900 |
| H  | 8.74868000  | -3.17647900 | -0.47855400 |
| H  | 8.12777400  | -4.83410400 | -0.37182200 |
| H  | 8.44935100  | -4.10725000 | -1.94710400 |
| Au | -1.37475300 | -0.19629100 | 0.37710200  |
| P  | -3.49097500 | -1.30830600 | 0.41146600  |
| C  | -4.37591000 | -0.71578100 | 2.01997800  |
| C  | -3.16107600 | -3.19725900 | 0.34743700  |
| C  | -4.65010500 | -0.93179400 | -0.98788500 |
| C  | -4.33667300 | -0.06854100 | -2.06868500 |
| C  | -5.94491200 | -1.49000000 | -0.93588300 |
| C  | -5.33280500 | 0.20102700  | -3.02590800 |
| C  | -3.02419700 | 0.60871400  | -2.31621700 |
| C  | -6.91179900 | -1.21554200 | -1.89820800 |
| H  | -6.21204000 | -2.15395300 | -0.12590100 |
| C  | -6.60414800 | -0.35786900 | -2.95211400 |
| H  | -5.08303300 | 0.86195100  | -3.84998600 |
| C  | -2.91760800 | 1.99769600  | -2.14216300 |
| C  | -1.93875200 | -0.08784300 | -2.87070600 |
| H  | -7.89559100 | -1.66768100 | -1.81914300 |
| H  | -7.34430400 | -0.12800500 | -3.71249800 |
| C  | -1.74934300 | 2.67161500  | -2.50105800 |
| H  | -3.75948600 | 2.54977200  | -1.73406400 |
| C  | -0.77177200 | 0.58743200  | -3.23446300 |
| H  | -2.01622000 | -1.15731800 | -3.03856500 |
| C  | -0.67657900 | 1.96809000  | -3.05100200 |
| H  | -1.68272800 | 3.74604600  | -2.35816900 |
| H  | 0.06060900  | 0.03373200  | -3.65615500 |

|   |             |             |             |
|---|-------------|-------------|-------------|
| H | 0.22838200  | 2.49471300  | -3.33911600 |
| C | -0.04690100 | 4.78466900  | 1.11267400  |
| C | -1.21077400 | 5.21529100  | 1.78373800  |
| C | 0.87080000  | 5.74976800  | 0.64802200  |
| C | -1.44242100 | 6.57238200  | 1.98750500  |
| H | -1.91854200 | 4.47534000  | 2.14320300  |
| C | 0.62452300  | 7.10509400  | 0.84792800  |
| H | 1.76440700  | 5.42492600  | 0.12518700  |
| C | -0.52843400 | 7.52036900  | 1.51958600  |
| H | -2.33899900 | 6.89283000  | 2.50933800  |
| H | 1.33339600  | 7.84125600  | 0.48071000  |
| H | -0.71457700 | 8.57843700  | 1.67663300  |
| C | -3.32843100 | -0.60506200 | 3.15141200  |
| H | -2.51993700 | 0.08427200  | 2.89368200  |
| H | -3.82674700 | -0.21938400 | 4.04839600  |
| H | -2.88221300 | -1.56694300 | 3.41185400  |
| C | -4.91112700 | 0.70057100  | 1.71617900  |
| H | -4.12003000 | 1.36170200  | 1.34630300  |
| H | -5.72044200 | 0.68914300  | 0.98262300  |
| H | -5.30181100 | 1.13578300  | 2.64301400  |
| C | -5.52909100 | -1.60693100 | 2.51990000  |
| H | -5.19204700 | -2.61032100 | 2.79208900  |
| H | -5.94843100 | -1.15273000 | 3.42512100  |
| H | -6.34699800 | -1.69236200 | 1.80263300  |
| C | -2.35174700 | -3.59980100 | 1.59676000  |
| H | -1.47352400 | -2.96459700 | 1.74552700  |
| H | -2.95717700 | -3.57358500 | 2.50687900  |
| H | -2.00260000 | -4.63143800 | 1.47142100  |
| C | -4.41252300 | -4.09119600 | 0.24643800  |
| H | -4.95391100 | -3.93497600 | -0.68853200 |
| H | -4.08664600 | -5.13770400 | 0.26034200  |
| H | -5.10503300 | -3.95815300 | 1.08021500  |
| C | -2.30253200 | -3.43444100 | -0.91515700 |
| H | -2.83832200 | -3.15082400 | -1.82615600 |
| H | -1.35341400 | -2.89184100 | -0.88916100 |
| H | -2.07494800 | -4.50415300 | -0.99045900 |
| C | 3.51644100  | 2.31469000  | -0.33344600 |
| C | 4.14696600  | 3.36141200  | 0.42518600  |

|   |            |            |             |
|---|------------|------------|-------------|
| C | 3.39516000 | 2.41060400 | -1.74789300 |
| C | 4.06021900 | 2.91858300 | 1.72600400  |
| C | 4.67096500 | 4.51617600 | -0.22517400 |
| C | 3.90897600 | 3.53924100 | -2.33601700 |
| H | 2.92230900 | 1.61547900 | -2.31058300 |
| H | 4.37380900 | 3.32040100 | 2.67890000  |
| C | 4.54312300 | 4.58716000 | -1.58715400 |
| H | 5.15502200 | 5.30237500 | 0.34424100  |
| H | 3.83836700 | 3.65032400 | -3.41388500 |
| H | 4.93014900 | 5.44765200 | -2.12293600 |
| N | 3.12972700 | 1.32073400 | 0.47641200  |
| O | 3.45610900 | 1.73048000 | 1.76773200  |

**TS<sub>BC</sub>**

|   |             |             |             |
|---|-------------|-------------|-------------|
| C | 1.83046900  | 0.60426100  | 0.47853800  |
| C | 0.49103100  | 0.99135000  | 0.53475400  |
| C | 0.16507100  | 2.33891500  | 0.65986500  |
| C | -0.20334500 | 3.50303100  | 0.78304400  |
| N | 2.27638400  | -0.74590300 | 0.48493400  |
| C | 2.62133500  | -1.39917900 | 1.72459600  |
| C | 1.62520900  | -1.74671800 | 2.64442600  |
| C | 3.96671700  | -1.64244700 | 2.02704900  |
| C | 1.97576400  | -2.33985200 | 3.85685700  |
| H | 0.58814600  | -1.54236200 | 2.40428800  |
| C | 4.30964500  | -2.25018200 | 3.23549800  |
| H | 4.73434000  | -1.35346900 | 1.31782300  |
| C | 3.31631700  | -2.59886700 | 4.15196500  |
| H | 1.20080600  | -2.60560100 | 4.56968100  |
| H | 5.35383900  | -2.44143600 | 3.46375900  |
| H | 3.58536600  | -3.06618400 | 5.09441300  |
| S | 2.20670400  | -1.61098300 | -0.99046700 |
| O | 1.26345300  | -2.72642100 | -0.84883700 |
| O | 1.99521200  | -0.57512400 | -2.01225200 |
| C | 3.83074800  | -2.31869100 | -1.22633200 |
| C | 4.04295500  | -3.66672400 | -0.93457500 |
| C | 4.86029500  | -1.51576700 | -1.72579500 |
| C | 5.31049300  | -4.20940800 | -1.13813600 |
| H | 3.22574100  | -4.27458900 | -0.56374200 |

|    |             |             |             |
|----|-------------|-------------|-------------|
| C  | 6.11904200  | -2.07658700 | -1.92055200 |
| H  | 4.67203500  | -0.47628100 | -1.97169000 |
| C  | 6.36560500  | -3.42908100 | -1.63169500 |
| H  | 5.48124100  | -5.25829900 | -0.91260300 |
| H  | 6.92289500  | -1.45948700 | -2.31264300 |
| C  | 7.72479100  | -4.03421500 | -1.88114100 |
| H  | 7.91126700  | -4.88684600 | -1.22277100 |
| H  | 7.80395000  | -4.39519500 | -2.91386200 |
| H  | 8.52373700  | -3.30261500 | -1.73092600 |
| Au | -1.14828100 | -0.27360800 | 0.37410100  |
| P  | -3.12863200 | -1.65968700 | 0.44057500  |
| C  | -4.07353800 | -1.10187800 | 2.02224200  |
| C  | -2.59757200 | -3.51263900 | 0.45094400  |
| C  | -4.35797000 | -1.45943900 | -0.93969800 |
| C  | -4.24774900 | -0.50121900 | -1.97955900 |
| C  | -5.50668000 | -2.27772700 | -0.91356600 |
| C  | -5.30198600 | -0.38672200 | -2.90635800 |
| C  | -3.08883300 | 0.40844700  | -2.23637400 |
| C  | -6.52691000 | -2.16275300 | -1.85292000 |
| H  | -5.62015100 | -3.01749700 | -0.13434300 |
| C  | -6.42902800 | -1.19916600 | -2.85394900 |
| H  | -5.20724200 | 0.34941700  | -3.69844100 |
| C  | -3.26039400 | 1.79900100  | -2.14515400 |
| C  | -1.87518200 | -0.08926700 | -2.73725300 |
| H  | -7.39054100 | -2.81793500 | -1.79453600 |
| H  | -7.21588800 | -1.08658900 | -3.59356200 |
| C  | -2.24450200 | 2.66930300  | -2.54168000 |
| H  | -4.20271500 | 2.19549000  | -1.77735000 |
| C  | -0.86126200 | 0.78172000  | -3.14320900 |
| H  | -1.73699300 | -1.16065900 | -2.84344400 |
| C  | -1.04647700 | 2.16184100  | -3.04876000 |
| H  | -2.39542700 | 3.74250600  | -2.46847900 |
| H  | 0.06747700  | 0.37181900  | -3.52502200 |
| H  | -0.26540800 | 2.84202700  | -3.37626700 |
| C  | -0.66358300 | 4.83587100  | 0.92148600  |
| C  | -2.05028300 | 5.10861100  | 0.93377400  |
| C  | 0.24859800  | 5.90676000  | 1.04890900  |
| C  | -2.50466900 | 6.41540500  | 1.07200100  |

|   |             |             |             |
|---|-------------|-------------|-------------|
| H | -2.74955000 | 4.28511500  | 0.83437300  |
| C | -0.21602700 | 7.21002600  | 1.18563800  |
| H | 1.31336300  | 5.69805600  | 1.03612400  |
| C | -1.59079000 | 7.46653500  | 1.19830700  |
| H | -3.57094500 | 6.61861900  | 1.08269100  |
| H | 0.48960000  | 8.02917200  | 1.28362200  |
| H | -1.94979000 | 8.48548300  | 1.30670000  |
| C | -3.18233000 | -1.36514800 | 3.25324200  |
| H | -2.17734600 | -0.94972200 | 3.12974200  |
| H | -3.63608000 | -0.88419800 | 4.12746800  |
| H | -3.09463500 | -2.43138200 | 3.47904900  |
| C | -4.28197900 | 0.42185500  | 1.86710800  |
| H | -3.33181000 | 0.95999700  | 1.80099700  |
| H | -4.87758200 | 0.66260700  | 0.98129500  |
| H | -4.82335900 | 0.79560900  | 2.74403900  |
| C | -5.45284300 | -1.74957200 | 2.25135100  |
| H | -5.40931400 | -2.83774300 | 2.32776200  |
| H | -5.85332900 | -1.37428400 | 3.20029000  |
| H | -6.16762200 | -1.48187600 | 1.47105600  |
| C | -1.30857100 | -3.64493800 | 1.29079900  |
| H | -0.48807400 | -3.06535600 | 0.86515000  |
| H | -1.45213900 | -3.35295900 | 2.33372200  |
| H | -1.00066200 | -4.69716400 | 1.28613600  |
| C | -3.63501700 | -4.50861800 | 1.00468000  |
| H | -4.56090500 | -4.53717700 | 0.42798600  |
| H | -3.20204100 | -5.51423300 | 0.95347000  |
| H | -3.87810300 | -4.31865900 | 2.05320500  |
| C | -2.25482200 | -3.87505100 | -1.01048500 |
| H | -3.12774700 | -3.83295100 | -1.66655600 |
| H | -1.47134100 | -3.22569400 | -1.41244200 |
| H | -1.86622300 | -4.89952900 | -1.03348000 |
| C | 3.12448100  | 2.58879900  | -0.34812000 |
| C | 3.91228100  | 3.57199000  | 0.32012500  |
| C | 2.81278800  | 2.72697600  | -1.72170400 |
| C | 4.05937900  | 3.12598500  | 1.63551100  |
| C | 4.39804800  | 4.71170100  | -0.37163600 |
| C | 3.29600000  | 3.84901900  | -2.36168200 |
| H | 2.23853100  | 1.95836200  | -2.22479700 |

|   |            |            |             |
|---|------------|------------|-------------|
| H | 4.63824800 | 3.57802400 | 2.43969100  |
| C | 4.07959400 | 4.84148300 | -1.70170700 |
| H | 5.00192700 | 5.45131700 | 0.14406600  |
| H | 3.07561700 | 3.98165300 | -3.41684700 |
| H | 4.42788400 | 5.69993400 | -2.26541800 |
| N | 2.83000100 | 1.53419600 | 0.43266600  |
| O | 3.45543400 | 2.02011900 | 1.89586700  |

**TS<sub>CD</sub>**

|   |             |             |             |
|---|-------------|-------------|-------------|
| C | -2.15968900 | 0.20388900  | -0.70069000 |
| C | -0.79586100 | 0.91383000  | -0.71607300 |
| C | -0.84311100 | 2.20361500  | -0.13629400 |
| C | -0.86664600 | 3.31613400  | 0.36713700  |
| N | -2.23957800 | -1.16715200 | -0.43816500 |
| C | -3.17764100 | -2.00017200 | -1.16069100 |
| C | -2.66050900 | -2.88334300 | -2.11333300 |
| C | -4.55433300 | -1.93974900 | -0.91904300 |
| C | -3.52759700 | -3.70904500 | -2.83040700 |
| H | -1.58956100 | -2.91795100 | -2.27970700 |
| C | -5.41361100 | -2.76137400 | -1.64734900 |
| H | -4.94021100 | -1.25365500 | -0.17538600 |
| C | -4.90303900 | -3.64626700 | -2.60046900 |
| H | -3.12791700 | -4.39676700 | -3.56919600 |
| H | -6.48309400 | -2.71325400 | -1.46702000 |
| H | -5.57691500 | -4.28617700 | -3.16201300 |
| S | -1.54159400 | -1.82465600 | 1.02272300  |
| O | -0.64713600 | -2.91492400 | 0.63170200  |
| O | -1.05645600 | -0.65622100 | 1.76314200  |
| C | -2.91909000 | -2.52938200 | 1.90616300  |
| C | -3.18376800 | -3.89654600 | 1.79561300  |
| C | -3.68707600 | -1.70217200 | 2.73155000  |
| C | -4.24240100 | -4.43483700 | 2.52201400  |
| H | -2.56596400 | -4.52056900 | 1.16019700  |
| C | -4.74110300 | -2.26226800 | 3.44730700  |
| H | -3.44956000 | -0.64794400 | 2.82318200  |
| C | -5.03568200 | -3.63240200 | 3.35641800  |
| H | -4.45432700 | -5.49725800 | 2.44293000  |
| H | -5.34010100 | -1.62886900 | 4.09552700  |

|    |             |             |             |
|----|-------------|-------------|-------------|
| C  | -6.15736000 | -4.23431300 | 4.16492500  |
| H  | -6.59089100 | -5.10400800 | 3.66392100  |
| H  | -5.79032300 | -4.57017300 | 5.14247500  |
| H  | -6.95453900 | -3.50883700 | 4.34836200  |
| Au | 1.11494000  | -0.02514400 | -0.51554800 |
| P  | 3.26326300  | -1.05687600 | -0.81166900 |
| C  | 4.16240100  | -0.00646800 | -2.14517900 |
| C  | 2.91663800  | -2.87090900 | -1.39011800 |
| C  | 4.47866800  | -1.13888100 | 0.59365300  |
| C  | 4.42807200  | -0.32588600 | 1.75483800  |
| C  | 5.57294600  | -2.01636400 | 0.44784800  |
| C  | 5.47080700  | -0.43423700 | 2.69651200  |
| C  | 3.37221400  | 0.67131000  | 2.11345300  |
| C  | 6.58472100  | -2.11660400 | 1.39727300  |
| H  | 5.64946400  | -2.63339900 | -0.43559000 |
| C  | 6.53427000  | -1.31446200 | 2.53469700  |
| H  | 5.41982400  | 0.18789900  | 3.58438300  |
| C  | 3.72215700  | 2.02802800  | 2.21305800  |
| C  | 2.09145700  | 0.27435900  | 2.52616200  |
| H  | 7.40400300  | -2.81164900 | 1.24176400  |
| H  | 7.31224900  | -1.37300900 | 3.28979300  |
| C  | 2.81545100  | 2.96408500  | 2.71020300  |
| H  | 4.71872100  | 2.34403000  | 1.91732000  |
| C  | 1.18773400  | 1.21113600  | 3.03255700  |
| H  | 1.80971200  | -0.77287000 | 2.48541200  |
| C  | 1.54725600  | 2.55564500  | 3.12833200  |
| H  | 3.10784800  | 4.00739800  | 2.78977900  |
| H  | 0.20566500  | 0.87924500  | 3.34921400  |
| H  | 0.84668100  | 3.28065700  | 3.53103600  |
| C  | -0.90193800 | 4.61620200  | 0.94208200  |
| C  | 0.28059500  | 5.37583200  | 1.06815500  |
| C  | -2.12451700 | 5.16631100  | 1.38212100  |
| C  | 0.23418200  | 6.65372400  | 1.61691700  |
| H  | 1.22082700  | 4.94756800  | 0.73802000  |
| C  | -2.15821500 | 6.44081300  | 1.93910800  |
| H  | -3.03393800 | 4.58309100  | 1.28039500  |
| C  | -0.98169600 | 7.18692300  | 2.05519400  |
| H  | 1.14638300  | 7.23534500  | 1.70797100  |

|   |             |             |             |
|---|-------------|-------------|-------------|
| H | -3.10111400 | 6.85629600  | 2.28116300  |
| H | -1.01217100 | 8.18250900  | 2.48743500  |
| C | 3.32772500  | -0.00319000 | -3.44182600 |
| H | 2.29103700  | 0.29695300  | -3.25906700 |
| H | 3.76765600  | 0.71582800  | -4.14280400 |
| H | 3.32376100  | -0.97708200 | -3.93841000 |
| C | 4.22090200  | 1.43172500  | -1.58459100 |
| H | 3.22391700  | 1.83470400  | -1.38305900 |
| H | 4.80335200  | 1.48570400  | -0.66100100 |
| H | 4.70809000  | 2.07915600  | -2.32310700 |
| C | 5.60137200  | -0.46219500 | -2.45355500 |
| H | 5.65008900  | -1.46832600 | -2.87356100 |
| H | 6.02886500  | 0.22090300  | -3.19676900 |
| H | 6.24120500  | -0.42419500 | -1.56933100 |
| C | 1.58325000  | -2.86955100 | -2.17574500 |
| H | 0.74570600  | -2.58613900 | -1.53578200 |
| H | 1.60399600  | -2.20628700 | -3.04382200 |
| H | 1.39822500  | -3.88763000 | -2.53904400 |
| C | 3.97991700  | -3.51752300 | -2.30298700 |
| H | 4.96816800  | -3.60469200 | -1.84979800 |
| H | 3.65087400  | -4.53715800 | -2.53422400 |
| H | 4.08452600  | -2.99162600 | -3.25497400 |
| C | 2.71676500  | -3.72523200 | -0.11947800 |
| H | 3.63782100  | -3.84886100 | 0.45336800  |
| H | 1.94886100  | -3.30196900 | 0.53429500  |
| H | 2.37249300  | -4.72138700 | -0.42067900 |
| C | -3.43206700 | 2.03492500  | -1.60093600 |
| C | -2.61958100 | 2.57588100  | -2.65059800 |
| C | -4.61148200 | 2.73334600  | -1.25856900 |
| C | -1.40947500 | 1.97067500  | -3.05946200 |
| C | -3.05183300 | 3.73082400  | -3.36057000 |
| C | -4.96259700 | 3.90160400  | -1.91208000 |
| H | -5.24399000 | 2.31166300  | -0.48511000 |
| H | -1.00412400 | 2.23041000  | -4.04356200 |
| C | -4.19066500 | 4.40474900  | -2.98216300 |
| H | -2.44659400 | 4.09040800  | -4.18845700 |
| H | -5.87102300 | 4.42041300  | -1.62039000 |
| H | -4.50172700 | 5.30200700  | -3.50549500 |



|                        |             |             |             |
|------------------------|-------------|-------------|-------------|
| N                      | -3.25124000 | 0.80437700  | -1.02760300 |
| O                      | -0.70158700 | 1.13113000  | -2.41696600 |
| <b>TS<sub>CF</sub></b> |             |             |             |
| C                      | 1.35940900  | -1.43707400 | 0.71195300  |
| C                      | 0.68794000  | -0.18622300 | 1.18544900  |
| C                      | 1.46292100  | 0.95764200  | 1.39983000  |
| C                      | 2.13099000  | 1.91870200  | 1.76335300  |
| N                      | 2.35481800  | -1.44975400 | -0.25129800 |
| C                      | 3.23582100  | -2.60415200 | -0.31947500 |
| C                      | 2.83890600  | -3.79448100 | -0.93491400 |
| C                      | 4.50381800  | -2.47943600 | 0.25370900  |
| C                      | 3.72923700  | -4.86643200 | -0.97354500 |
| H                      | 1.84853800  | -3.87693500 | -1.36429700 |
| C                      | 5.38586000  | -3.55950000 | 0.21333800  |
| H                      | 4.78845700  | -1.54250800 | 0.72179700  |
| C                      | 4.99897600  | -4.75157200 | -0.40172100 |
| H                      | 3.42593600  | -5.79614500 | -1.44433300 |
| H                      | 6.37145400  | -3.46817200 | 0.65909100  |
| H                      | 5.68514600  | -5.59244600 | -0.43337400 |
| S                      | 2.15643600  | -0.58008300 | -1.78505600 |
| O                      | 1.80314000  | -1.57441100 | -2.79617000 |
| O                      | 1.25492100  | 0.53631100  | -1.49289400 |
| C                      | 3.79484100  | 0.02825200  | -2.11113400 |
| C                      | 4.60566400  | -0.65470800 | -3.02002500 |
| C                      | 4.22320800  | 1.20217100  | -1.48514800 |
| C                      | 5.87410900  | -0.14898300 | -3.29424500 |
| H                      | 4.24467200  | -1.55635400 | -3.50127300 |
| C                      | 5.49501300  | 1.68736600  | -1.77463500 |
| H                      | 3.57042200  | 1.72653800  | -0.79629000 |
| C                      | 6.33841900  | 1.02464000  | -2.68177200 |
| H                      | 6.51271400  | -0.67363600 | -3.99898200 |
| H                      | 5.83608800  | 2.60157800  | -1.29692500 |
| C                      | 7.69963700  | 1.58092100  | -3.01625600 |
| H                      | 7.63976800  | 2.24962300  | -3.88359900 |
| H                      | 8.11254800  | 2.16014600  | -2.18597200 |
| H                      | 8.40681300  | 0.78577800  | -3.26723700 |
| Au                     | -1.30012900 | -0.00452200 | 0.41923100  |

|   |             |             |             |
|---|-------------|-------------|-------------|
| P | -3.45896200 | -0.29537700 | -0.59550300 |
| C | -4.72927500 | -0.59621400 | 0.81221300  |
| C | -3.22285100 | -1.81117700 | -1.77561600 |
| C | -4.20460200 | 1.07958300  | -1.59732300 |
| C | -3.76194100 | 2.42593200  | -1.58222300 |
| C | -5.34796300 | 0.76670900  | -2.36234100 |
| C | -4.49356600 | 3.38234100  | -2.31424800 |
| C | -2.56181900 | 2.97542200  | -0.87983400 |
| C | -6.04392000 | 1.72402600  | -3.09303200 |
| H | -5.72146700 | -0.24644500 | -2.37712000 |
| C | -5.61538400 | 3.04899600  | -3.06394100 |
| H | -4.14440400 | 4.40982500  | -2.29932800 |
| C | -2.73571000 | 3.93261400  | 0.13274300  |
| C | -1.26413500 | 2.71119800  | -1.34476400 |
| H | -6.91561700 | 1.43323100  | -3.67090500 |
| H | -6.14437300 | 3.81534100  | -3.62216100 |
| C | -1.64167300 | 4.62142400  | 0.65738700  |
| H | -3.73765600 | 4.15709400  | 0.48781300  |
| C | -0.17159500 | 3.40840900  | -0.82617900 |
| H | -1.10926800 | 1.99135800  | -2.14178800 |
| C | -0.35869900 | 4.37148700  | 0.16630200  |
| H | -1.79751700 | 5.37077800  | 1.42836300  |
| H | 0.81992000  | 3.19854900  | -1.21140700 |
| H | 0.49004800  | 4.93204100  | 0.54522000  |
| C | 2.93097200  | 3.00836000  | 2.19440600  |
| C | 2.33482600  | 4.17699500  | 2.71873600  |
| C | 4.34055800  | 2.92568000  | 2.12964700  |
| C | 3.12952100  | 5.22974100  | 3.16028300  |
| H | 1.25355600  | 4.23630100  | 2.77679100  |
| C | 5.12495100  | 3.98946800  | 2.56216800  |
| H | 4.80028600  | 2.02411400  | 1.73755600  |
| C | 4.52271700  | 5.14112200  | 3.07888000  |
| H | 2.66518800  | 6.12242500  | 3.56756900  |
| H | 6.20694800  | 3.92068200  | 2.50666100  |
| H | 5.13865300  | 5.96701900  | 3.42124900  |
| C | -4.33238900 | -1.86604200 | 1.58850600  |
| H | -3.28507900 | -1.84158200 | 1.90171600  |
| H | -4.95224100 | -1.93670500 | 2.49016000  |

|           |             |             |             |
|-----------|-------------|-------------|-------------|
| H         | -4.50043600 | -2.77655400 | 1.00720100  |
| C         | -4.61117800 | 0.62759100  | 1.74765100  |
| H         | -3.60767900 | 0.72114200  | 2.17380600  |
| H         | -4.85107000 | 1.56099900  | 1.23038700  |
| H         | -5.32328400 | 0.51368200  | 2.57329400  |
| C         | -6.19466600 | -0.71696100 | 0.35246300  |
| H         | -6.35897300 | -1.55128000 | -0.33272800 |
| H         | -6.81814000 | -0.89534500 | 1.23626100  |
| H         | -6.55453500 | 0.19830500  | -0.12095200 |
| C         | -2.25386600 | -2.81575400 | -1.10976700 |
| H         | -1.26833500 | -2.38284100 | -0.92731400 |
| H         | -2.63132500 | -3.21175100 | -0.16526600 |
| H         | -2.11682500 | -3.66529700 | -1.78780000 |
| C         | -4.50120400 | -2.59069200 | -2.14912800 |
| H         | -5.22449000 | -2.00407600 | -2.71634900 |
| H         | -4.20965400 | -3.42976600 | -2.79080100 |
| H         | -5.00222700 | -3.01627100 | -1.27616400 |
| C         | -2.54889600 | -1.26445100 | -3.05284000 |
| H         | -3.20400200 | -0.59680300 | -3.61711900 |
| H         | -1.61995000 | -0.73116700 | -2.82546000 |
| H         | -2.28805500 | -2.10837900 | -3.70114800 |
| C         | 0.30575100  | -2.39135400 | 2.38783200  |
| C         | -0.66765600 | -3.31130300 | 2.88598300  |
| C         | 0.47229800  | -1.11500400 | 3.04318600  |
| C         | -0.91804700 | -4.65430300 | 2.29472900  |
| C         | -1.48158600 | -2.89632500 | 3.93017000  |
| C         | -0.43901800 | -0.72041400 | 4.07391200  |
| H         | 1.49316000  | -0.77423200 | 3.17256700  |
| H         | -1.59273500 | -5.28344400 | 2.91799800  |
| C         | -1.40390400 | -1.59910000 | 4.50188200  |
| H         | -2.23334400 | -3.58849500 | 4.30384600  |
| H         | -0.31210700 | 0.24569000  | 4.55271000  |
| H         | -2.07855300 | -1.33039900 | 5.30800000  |
| N         | 1.01655600  | -2.59020500 | 1.26244700  |
| O         | -0.47554600 | -5.06278600 | 1.24363900  |
| <b>1a</b> |             |             |             |
| C         | -0.03684400 | -1.01855900 | -0.61135500 |

|   |             |             |             |
|---|-------------|-------------|-------------|
| C | -1.23184500 | -0.83210900 | -0.44756500 |
| C | -2.56243400 | -0.62533300 | -0.26949300 |
| C | -3.75904900 | -0.43854700 | -0.10805200 |
| N | 1.27156900  | -1.23718300 | -0.80523200 |
| C | 2.02606200  | -1.98192000 | 0.17502800  |
| C | 2.99768000  | -2.89159800 | -0.25332600 |
| C | 1.76432200  | -1.80952100 | 1.53845400  |
| C | 3.71637000  | -3.61877500 | 0.69457400  |
| H | 3.18216000  | -3.01620800 | -1.31276200 |
| C | 2.47661800  | -2.55582700 | 2.47542700  |
| H | 0.99801400  | -1.10787200 | 1.85119200  |
| C | 3.45743700  | -3.45707300 | 2.05696500  |
| H | 4.47190100  | -4.32467400 | 0.36351600  |
| H | 2.26735700  | -2.42786800 | 3.53318300  |
| H | 4.01291100  | -4.03538800 | 2.78903000  |
| S | 2.11189600  | -0.02267700 | -1.79872500 |
| O | 3.42730300  | -0.59346400 | -2.07787500 |
| O | 1.16159900  | 0.32059400  | -2.84970500 |
| C | 2.31108400  | 1.37665400  | -0.70919900 |
| C | 3.47194000  | 1.48622000  | 0.05951800  |
| C | 1.28585800  | 2.32183800  | -0.61815500 |
| C | 3.60152800  | 2.56618900  | 0.92909300  |
| H | 4.25788400  | 0.74596000  | -0.03693900 |
| C | 1.43677600  | 3.39159600  | 0.25990500  |
| H | 0.39852000  | 2.22184000  | -1.23242200 |
| C | 2.59172200  | 3.53256300  | 1.04356000  |
| H | 4.50357900  | 2.66154000  | 1.52708800  |
| H | 0.64534800  | 4.13209700  | 0.33520400  |
| C | 2.75654000  | 4.71578900  | 1.96549900  |
| H | 3.41723100  | 4.48105800  | 2.80456200  |
| H | 3.19568600  | 5.56749000  | 1.43160800  |
| H | 1.79486800  | 5.04599200  | 2.36837100  |
| C | -5.15288300 | -0.21972100 | 0.06975500  |
| C | -5.98052200 | 0.05875700  | -1.03781100 |
| C | -5.73100500 | -0.27708400 | 1.35477100  |
| C | -7.34317800 | 0.27687000  | -0.85893500 |
| H | -5.54007800 | 0.10086600  | -2.02840800 |
| C | -7.09632900 | -0.06552500 | 1.52105700  |

|   |             |             |             |
|---|-------------|-------------|-------------|
| H | -5.09784800 | -0.49034500 | 2.20967400  |
| C | -7.90651800 | 0.21400800  | 0.41790500  |
| H | -7.96920400 | 0.49276900  | -1.71966000 |
| H | -7.52989600 | -0.11586100 | 2.51551200  |
| H | -8.97095500 | 0.38131200  | 0.55240000  |

# Spectra of key Compounds

7.598  
7.594  
7.566  
7.564  
7.562  
7.553  
7.550  
7.548  
7.546  
7.541  
7.536  
7.532  
7.526  
7.524  
7.521  
7.511  
7.507  
7.504  
7.506  
7.502  
7.478  
7.274  
7.264  
7.240  
7.185  
7.180  
7.177  
7.169  
7.166  
7.161

2.435

```

Current Data Parameters
NAME      YP-03-143-A
EXPNO     1
PROCNO    1

F2 - Acquisition Parameters
Date_     20200217
Time      10.00
INSTRUM   spect
PROBHD    5 mm QNP 1H/1
PULPROG   zg
TD         32768
SOLVENT   CDC13
NS         32
DS         0
SWH        9541.984 Hz
FIDRES     0.291198 Hz
AQ         1.7170932 sec
RG         256
DW         52.400 usec
DE         6.50 usec
TE         293.7 K
D1         2.00000000 sec
MCREST    0 sec
MCWRK     0.01500000 sec

===== CHANNEL f1 =====
NUC1       1H
P1         10.15 usec
PL1        -1.00 dB
SFO1       598.1034854 MHz

F2 - Processing parameters
SI         32768
SF         598.1000313 MHz
WDW        no
SSB        0
LB         0 Hz
GB         0
PC         2.00
    
```

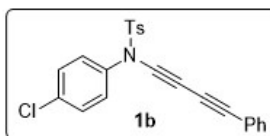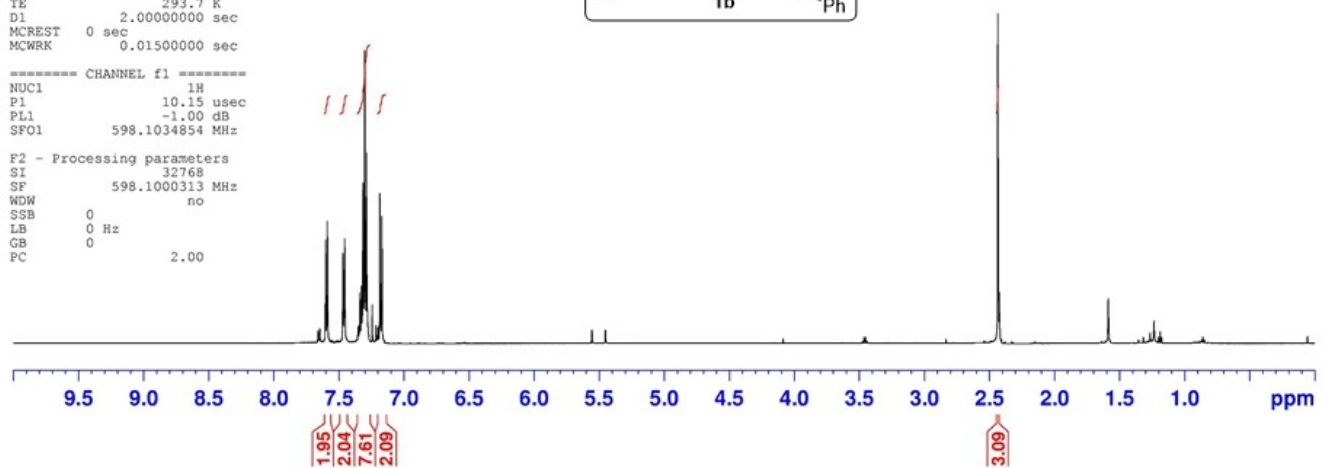

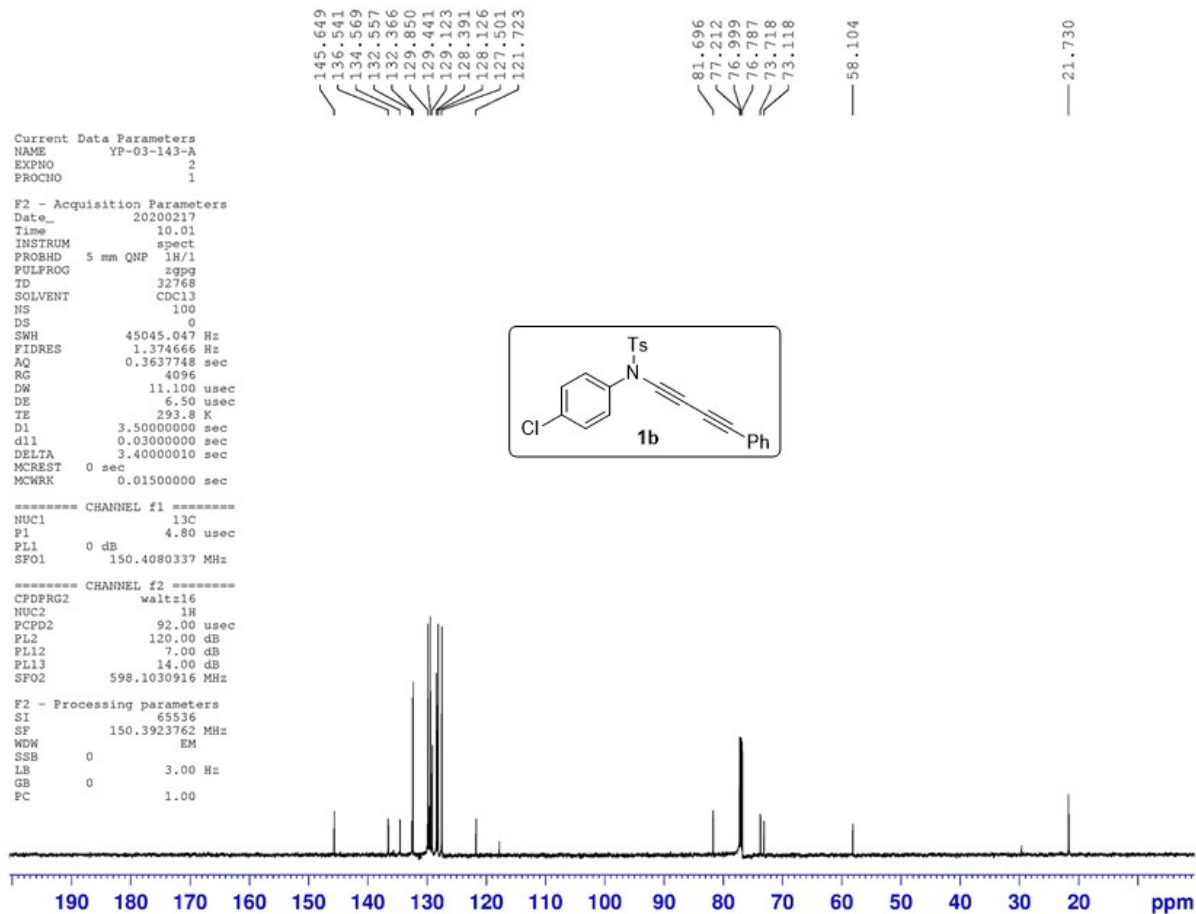

7.600  
7.596  
7.592  
7.582  
7.437  
7.336  
7.332  
7.327  
7.324  
7.322  
7.310  
7.298  
7.289  
7.286  
7.284  
7.282  
7.273  
7.109

2.435

Current Data Parameters  
 NAME YP-03-142  
 EXPNO 1  
 PROCNO 1

F2 - Acquisition Parameters  
 Date\_ 20200217  
 Time 9.23  
 INSTRUM spect  
 PROBHD 5 mm QNP 1H/1  
 PULPROG zg  
 TD 32768  
 SOLVENT CDC13  
 NS 32  
 DS 0  
 SWH 9541.984 Hz  
 FIDRES 0.291198 Hz  
 AQ 1.7170932 sec  
 RG 256  
 DW 52.400 usec  
 DE 6.50 usec  
 TE 293.9 K  
 D1 2.0000000 sec  
 MCREST 0 sec  
 MCWRK 0.01500000 sec

===== CHANNEL f1 =====  
 NUC1 1H  
 P1 10.15 usec  
 PL1 -1.00 dB  
 SFO1 598.1034854 MHz

F2 - Processing parameters  
 SI 32768  
 SF 598.1000311 MHz  
 WDW no  
 SSB 0  
 LB 0 Hz  
 GB 0  
 PC 2.00

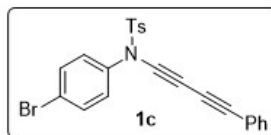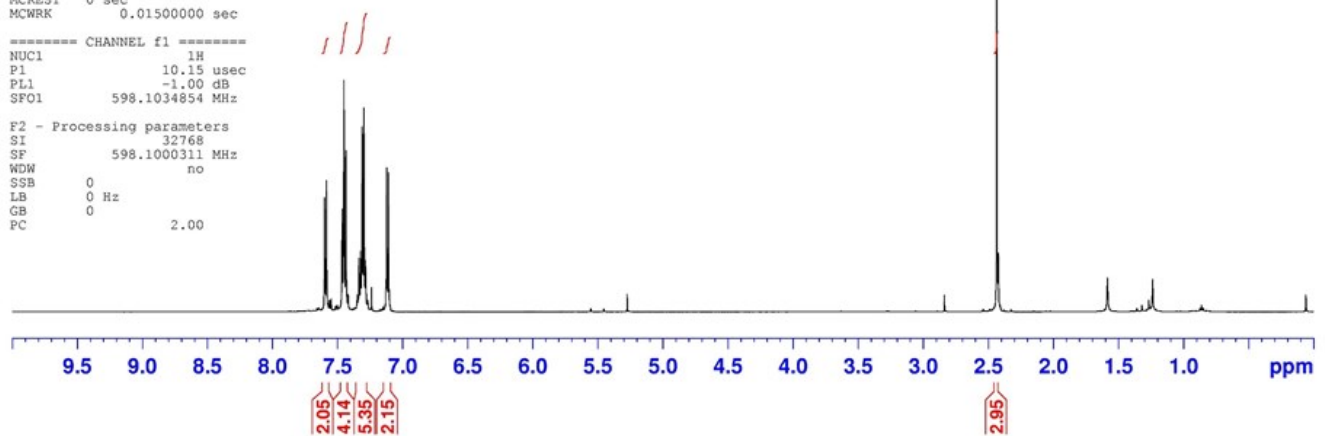



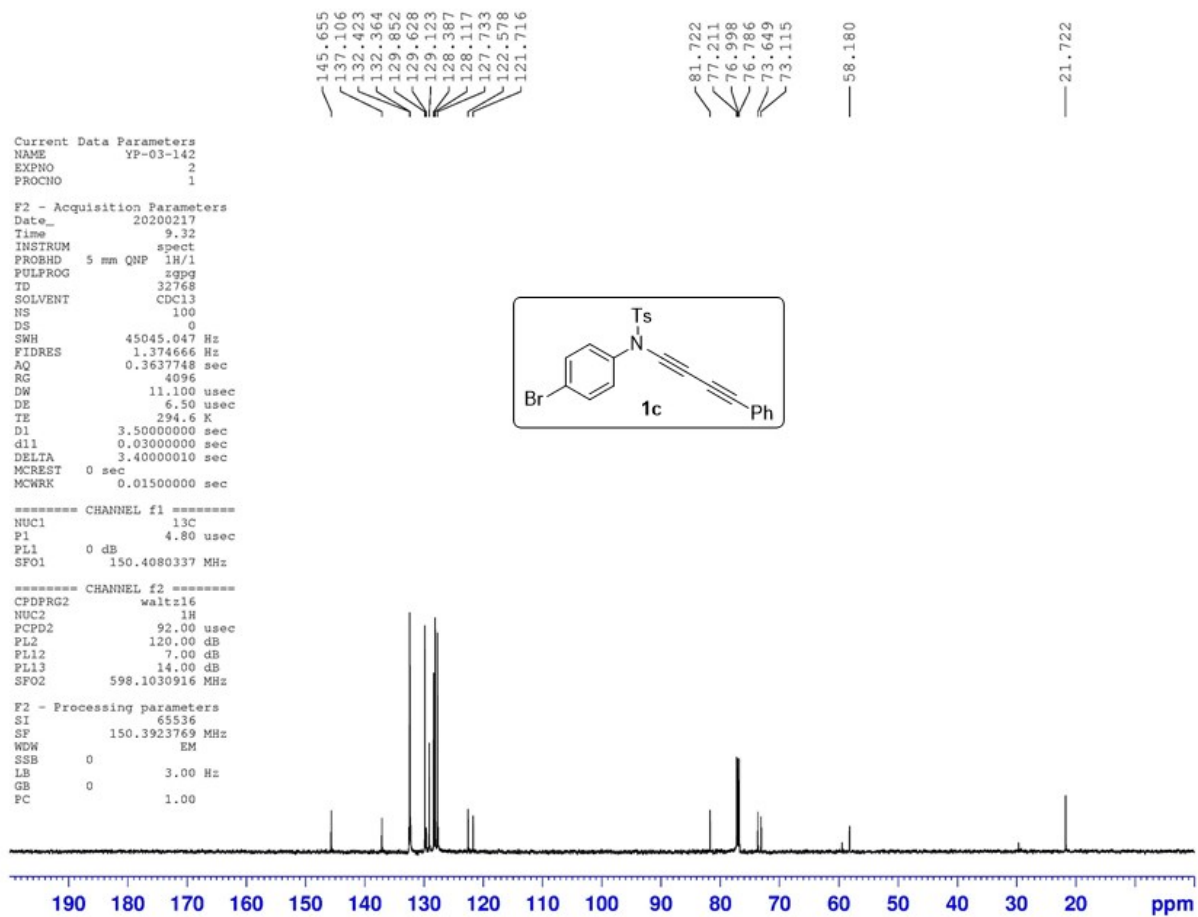

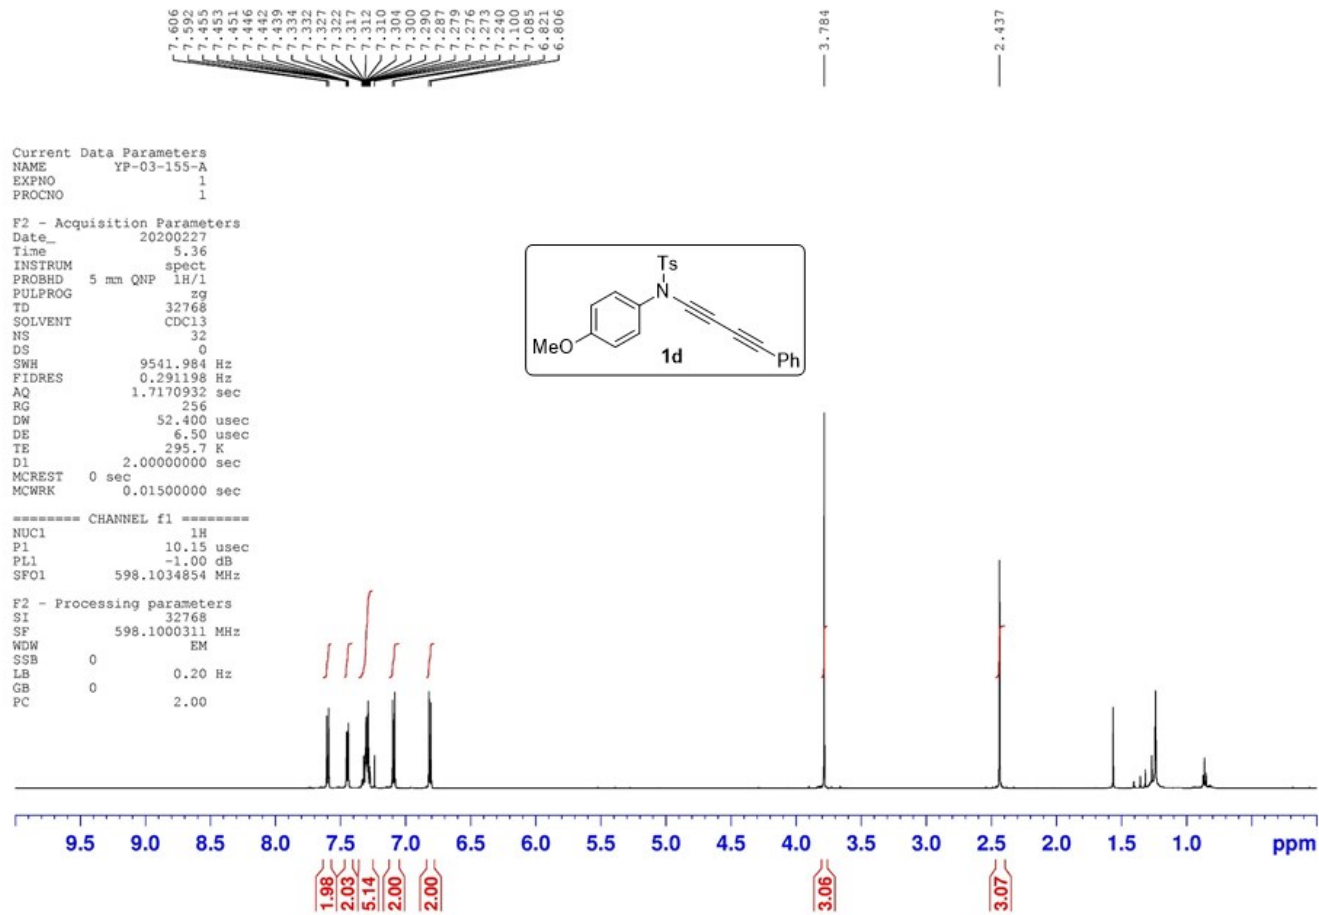

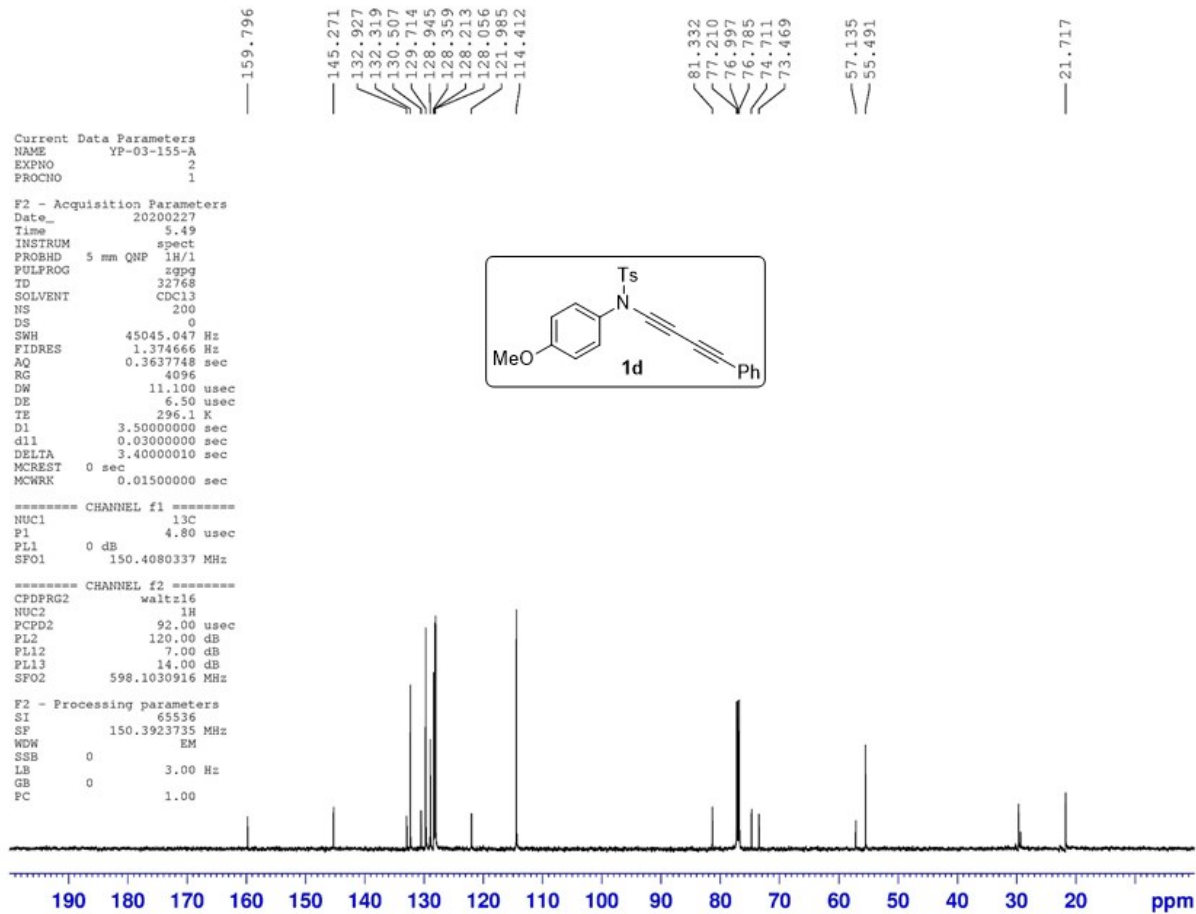

7.611  
7.597  
7.457  
7.444  
7.338  
7.336  
7.331  
7.325  
7.321  
7.316  
7.314  
7.311  
7.303  
7.302  
7.290  
7.289  
7.279  
7.277  
7.242  
7.133  
7.123  
7.109  
7.098  
7.074

2.435  
2.331

Current Data Parameters  
NAME YP-03-143-B  
EXPNO 1  
PROCNO 1

F2 - Acquisition Parameters  
Date\_ 20200217  
Time 10.34  
INSTRUM spect  
PROBHD 5 mm QNP 1H/1  
PULPROG zg  
TD 32768  
SOLVENT CDC13  
NS 32  
DS 0  
SWH 9541.984 Hz  
FIDRES 0.291198 Hz  
AQ 1.7170932 sec  
RG 256  
DW 52.400 usec  
DE 6.50 usec  
TE 293.6 K  
D1 2.0000000 sec  
MCREST 0 sec  
MCWRK 0.0150000 sec

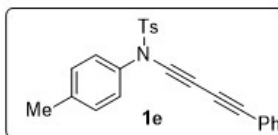

==== CHANNEL f1 =====  
NUC1 1H  
P1 10.15 usec  
PL1 -1.00 dB  
SFO1 598.1034854 MHz

F2 - Processing parameters  
SI 32768  
SF 598.1000305 MHz  
WDW no  
SSB 0  
LB 0 Hz  
GB 0  
PC 2.00

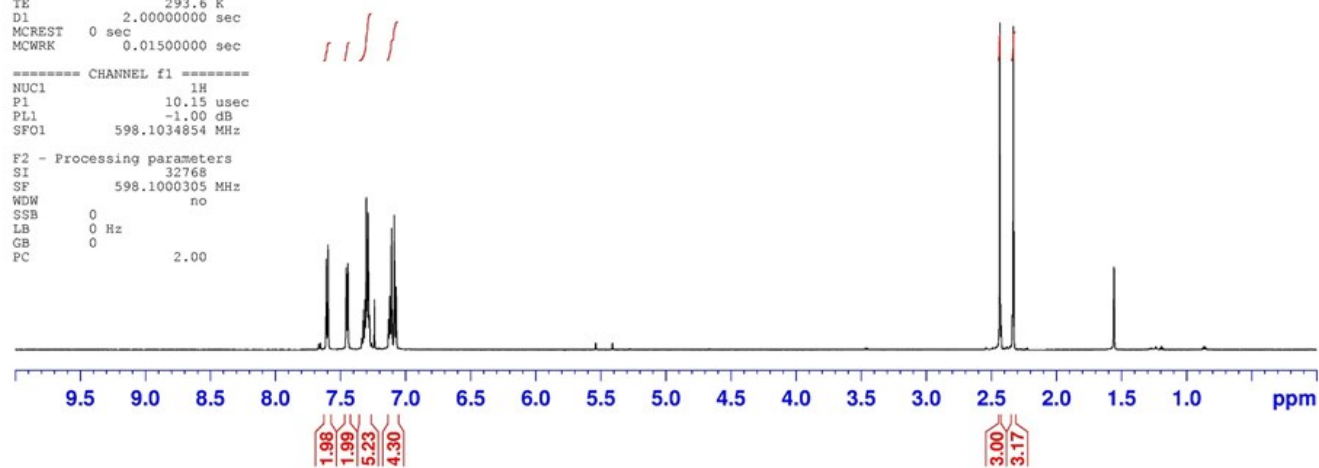

```

Current Data Parameters
NAME      YP-03-143-B
EXPNO     2
PROCNO    1

F2 - Acquisition Parameters
Date_     20200217
Time      10.55
INSTRUM   spect
PROBHD    5 mm QNP 1H/1
PULPROG   zgpg
TD         32768
SOLVENT   CDCl3
NS         300
DS         0
SWH        45045.047 Hz
FIDRES     1.374666 Hz
AQ         0.3637748 sec
RG         4096
DW         11.100 usec
DE         6.50 usec
TE         293.9 K
D1         3.5000000 sec
d11        0.0300000 sec
DELTA     3.4000010 sec
MCREST    0 sec
MCWRK     0.01500000 sec

===== CHANNEL f1 =====
NUC1       13C
P1         4.80 usec
PL1        0 dB
SFO1      150.4080337 MHz

===== CHANNEL f2 =====
CPDPRG2    waltz16
NUC2        1H
PCPD2      92.00 usec
PL2        120.00 dB
PL12       7.00 dB
PL13       14.00 dB
SFO2      598.1030916 MHz

F2 - Processing parameters
SI         65536
SF         150.3923735 MHz
WDW        EM
SSB        0
LB         3.00 Hz
GB         0
PC         1.00

```

145.266  
138.969  
135.364  
133.000  
132.334  
129.890  
129.708  
128.957  
128.362  
128.183  
126.316  
121.969

81.306  
77.209  
76.997  
76.784  
74.555  
73.458

— 57.353

21.723  
21.113

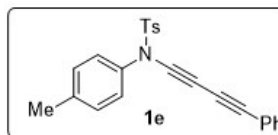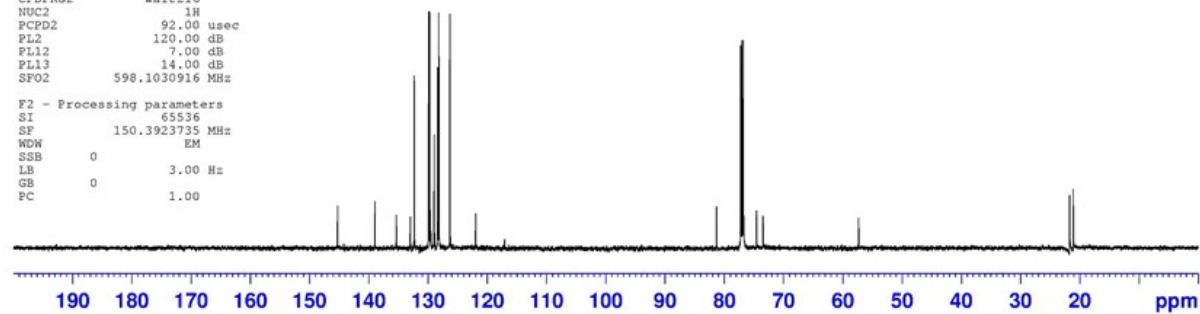

7.621  
7.607  
7.475  
7.473  
7.471  
7.465  
7.462  
7.440  
7.430  
7.335  
7.330  
7.327  
7.324  
7.323  
7.317  
7.315  
7.313  
7.311  
7.310  
7.304  
7.299  
7.299  
7.292  
7.290  
7.289  
7.288  
7.287  
7.285  
7.274  
7.261  
7.255  
7.252  
7.248  
7.246  
7.206  
7.194  
7.184  
7.182  
7.181  
7.178  
7.175  
7.171  
7.169  
7.168  
7.165  
7.161

2.443

Current Data Parameters  
 NAME YP-03-156  
 EXPNO 1  
 PROCNO 1

F2 - Acquisition Parameters  
 Date\_ 20200227  
 Time 12.19  
 INSTRUM spect  
 PROBHD 5 mm QNP 1H/1  
 PULPROG zg  
 TD 32768  
 SOLVENT CDC13  
 NS 32  
 DS 0  
 SWH 9541.984 Hz  
 FIDRES 0.291198 Hz  
 AQ 1.7170932 sec  
 RG 512  
 DW 52.400 usec  
 DE 6.50 usec  
 TE 295.9 K  
 D1 2.0000000 sec  
 MCREST 0 sec  
 MCWRK 0.0150000 sec

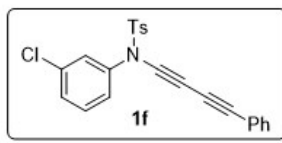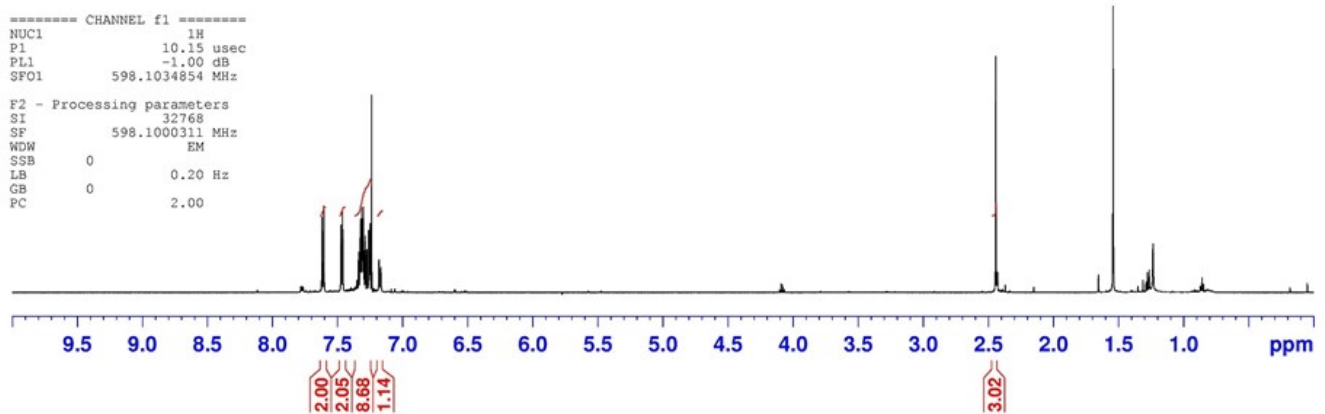

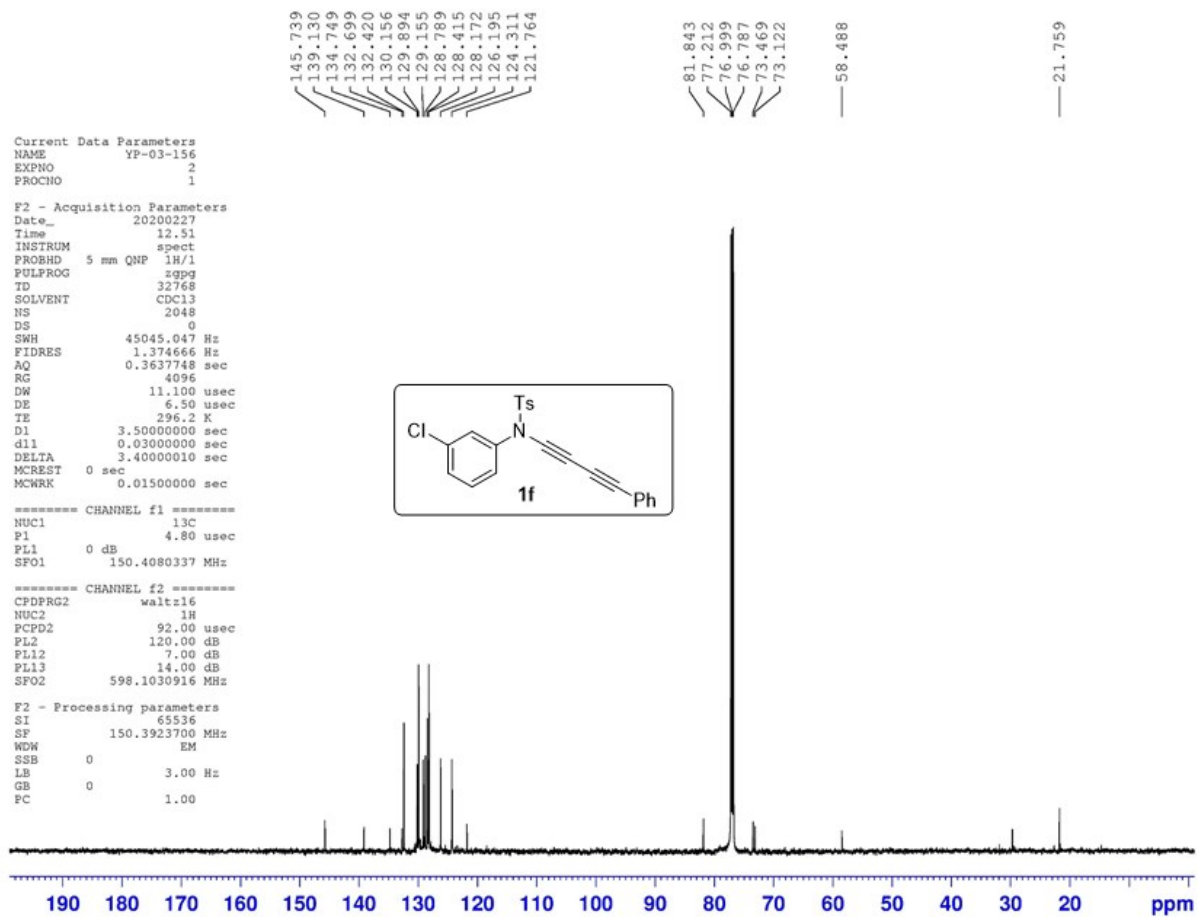

7.618  
7.602  
7.473  
7.458  
7.358  
7.339  
7.325  
7.312  
7.300  
7.286  
7.239  
7.230  
7.214  
7.199  
7.183

2.443

YP-03-159-H1

Current Data Parameters  
NAME YP-03-159-H1.fid  
EXPNO 1  
PROCNO 1

F2 - Processing parameters  
SI 16384  
SF 499.7873545 MHz  
WDW EM  
SSB 0  
LB 0.30 Hz  
GB 0  
PC 1.00

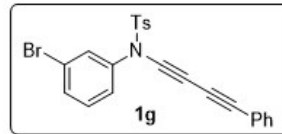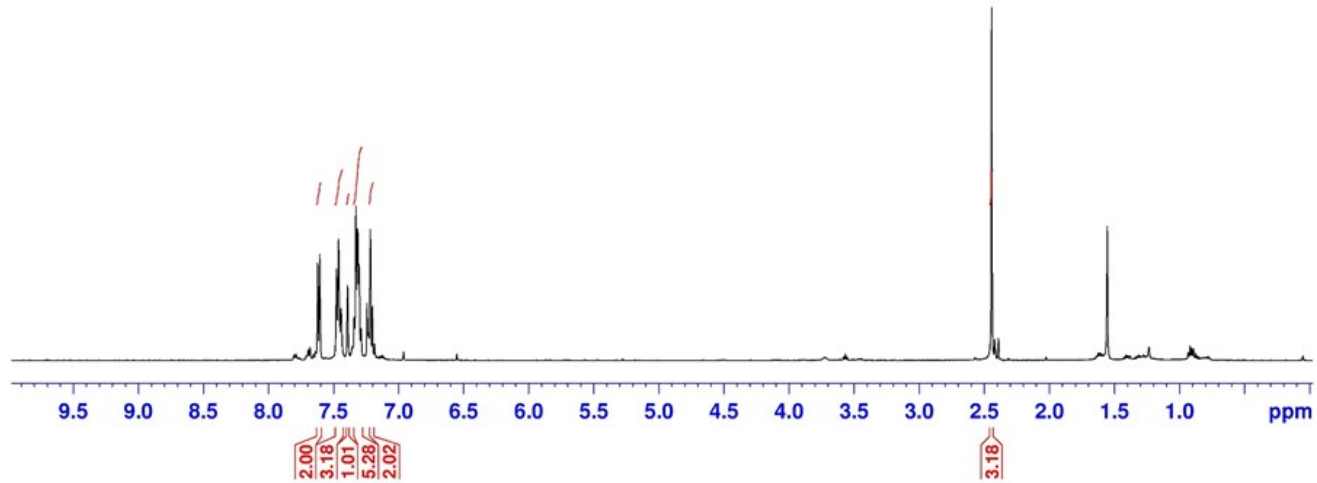



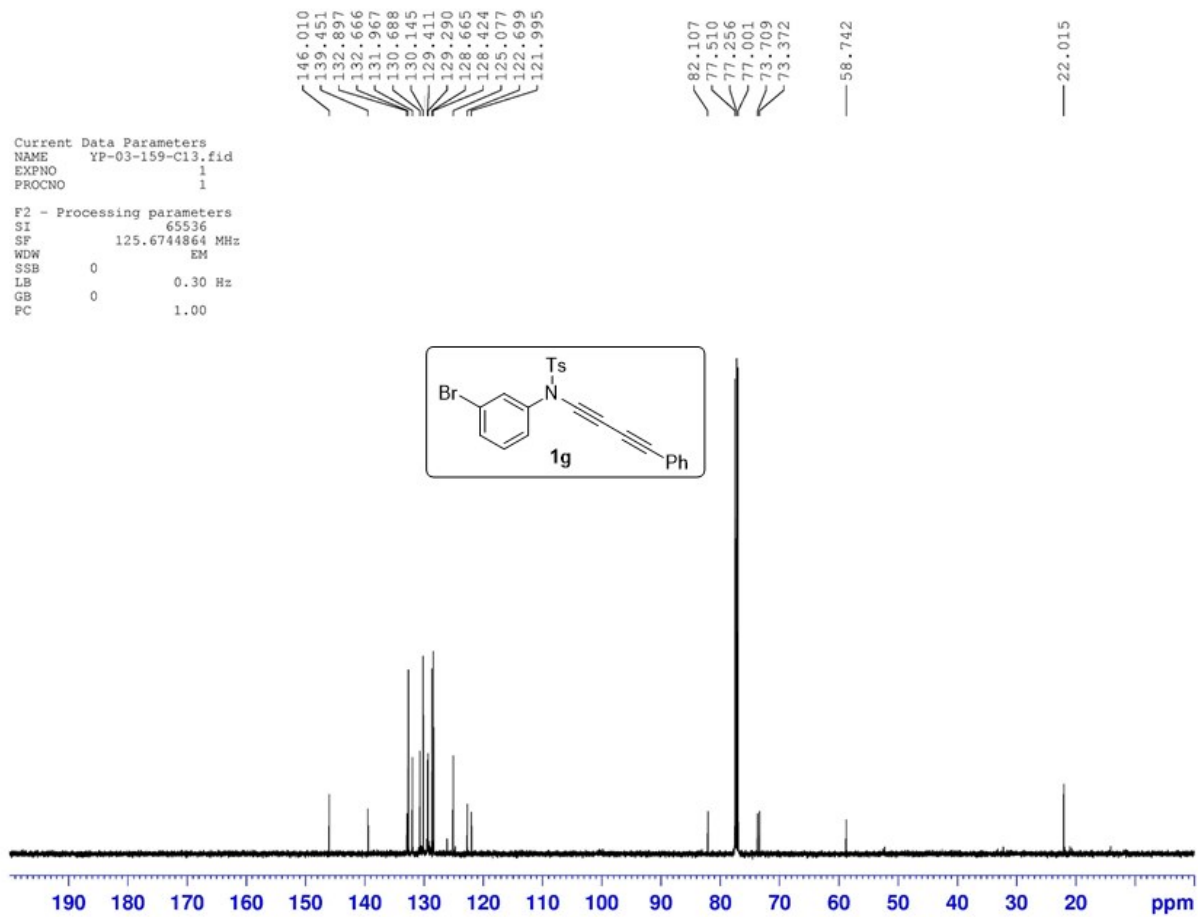

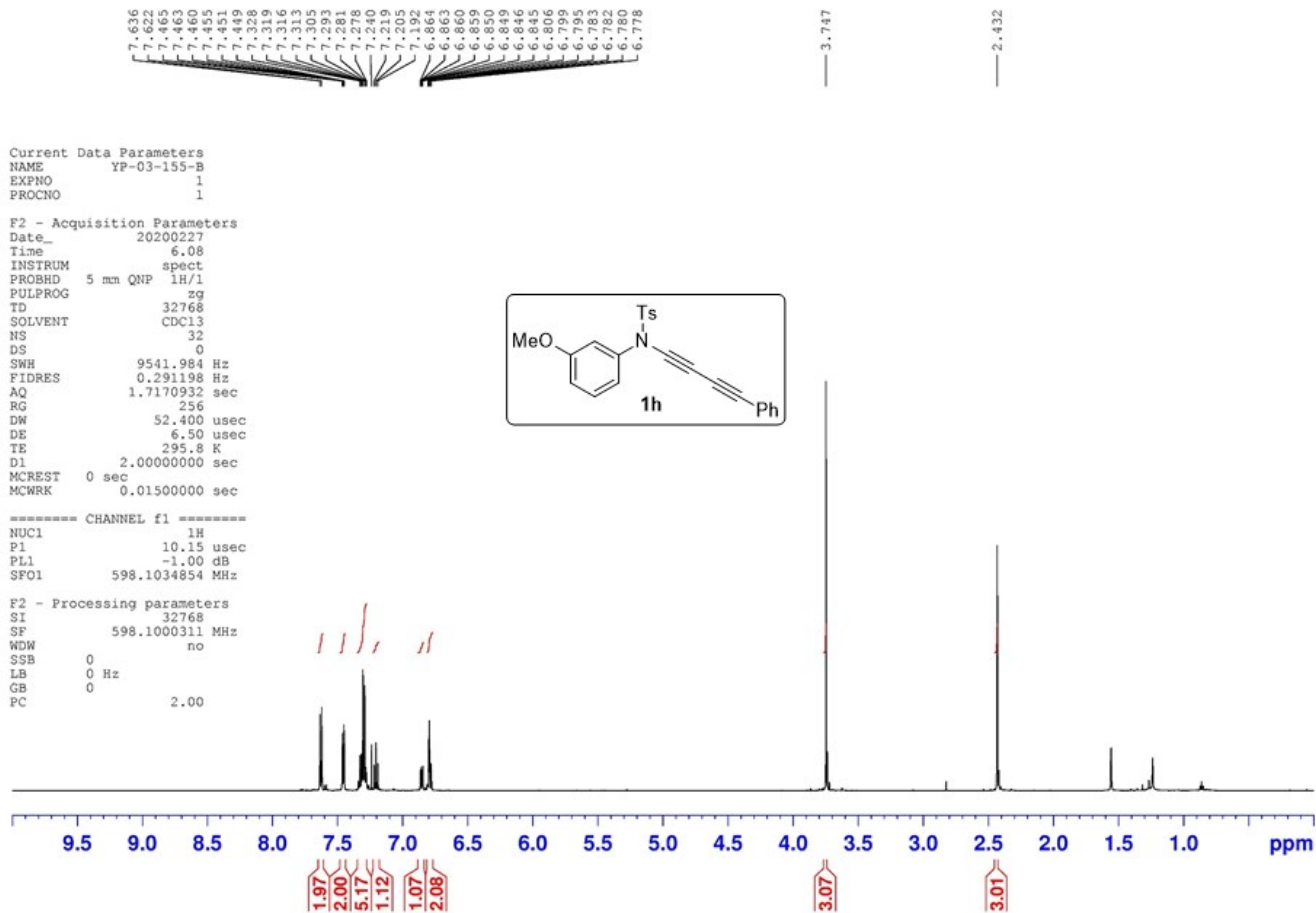

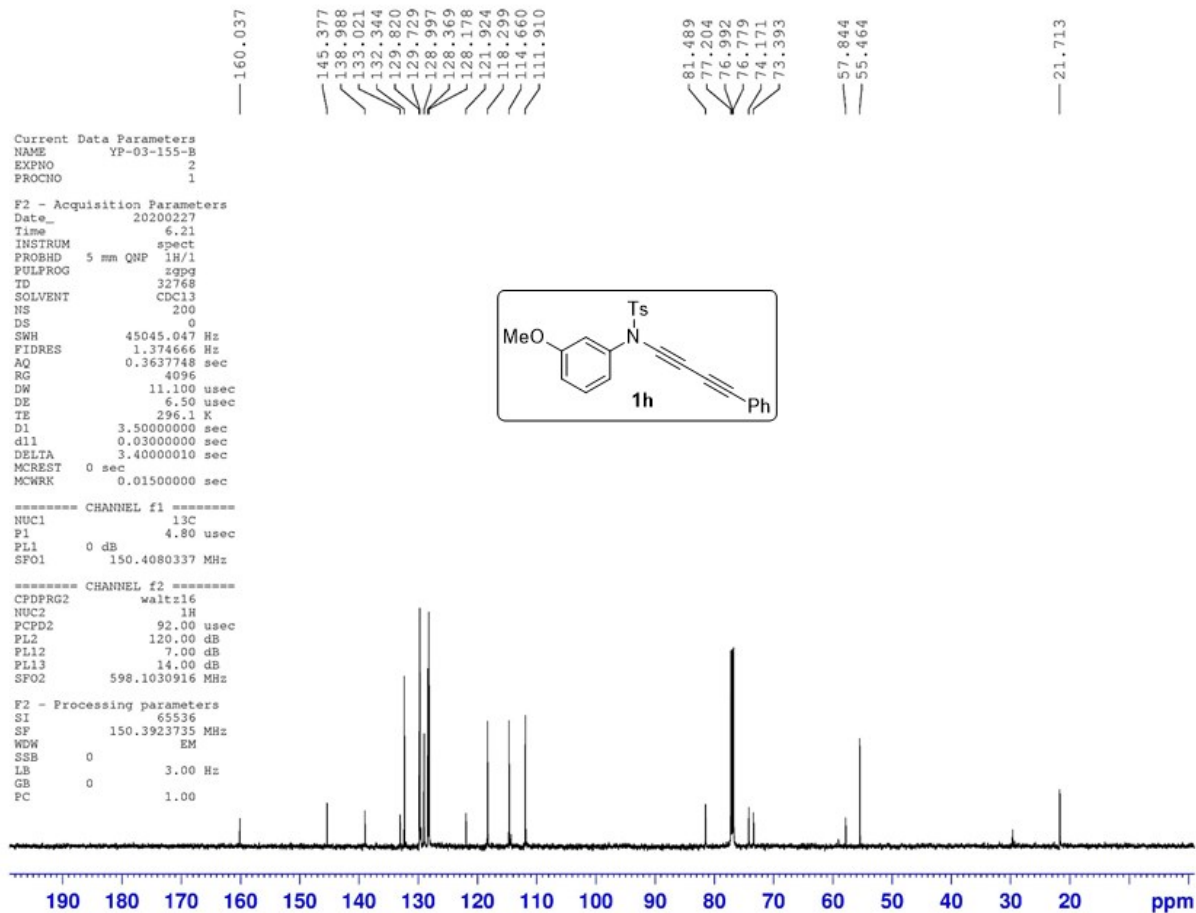

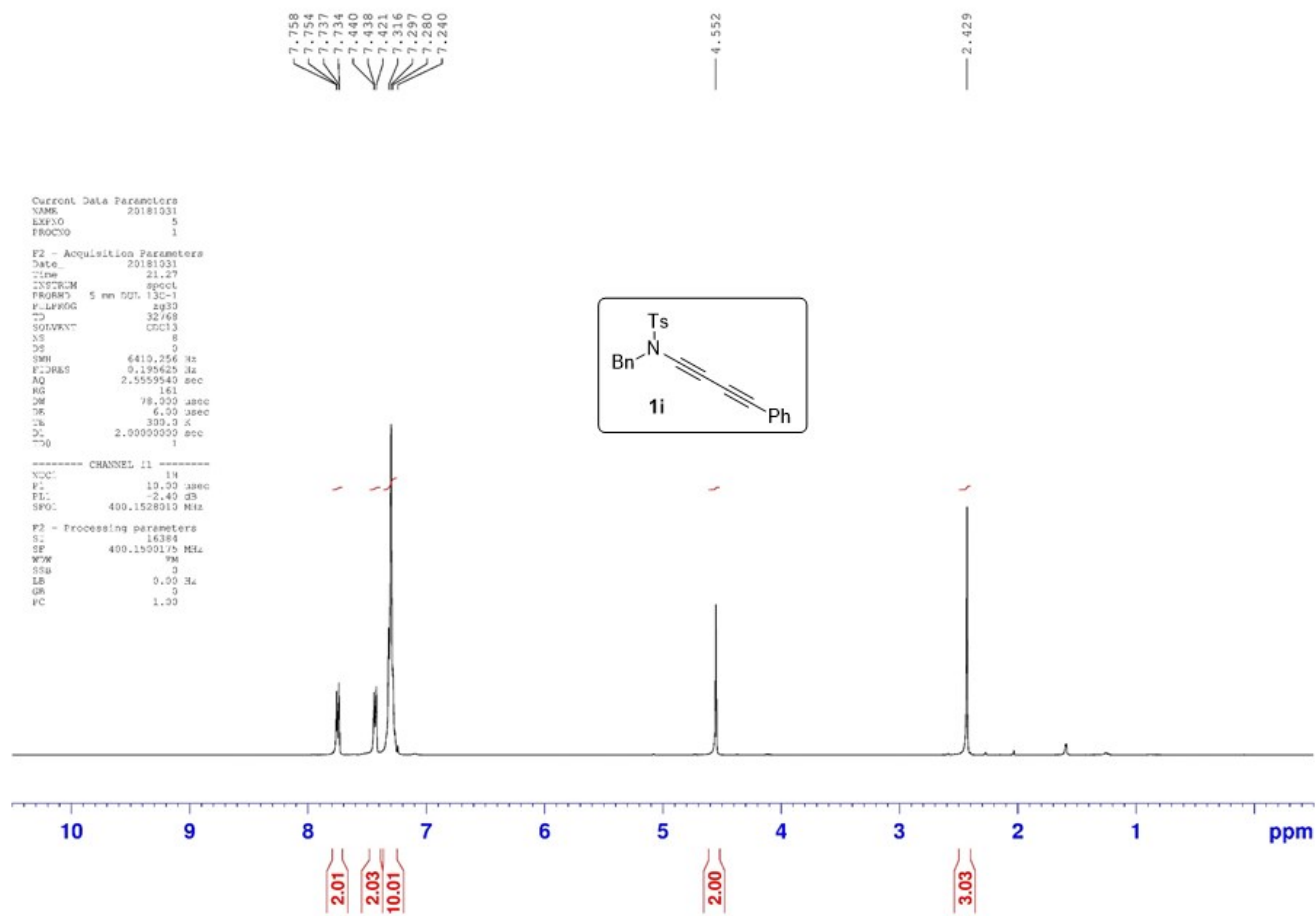

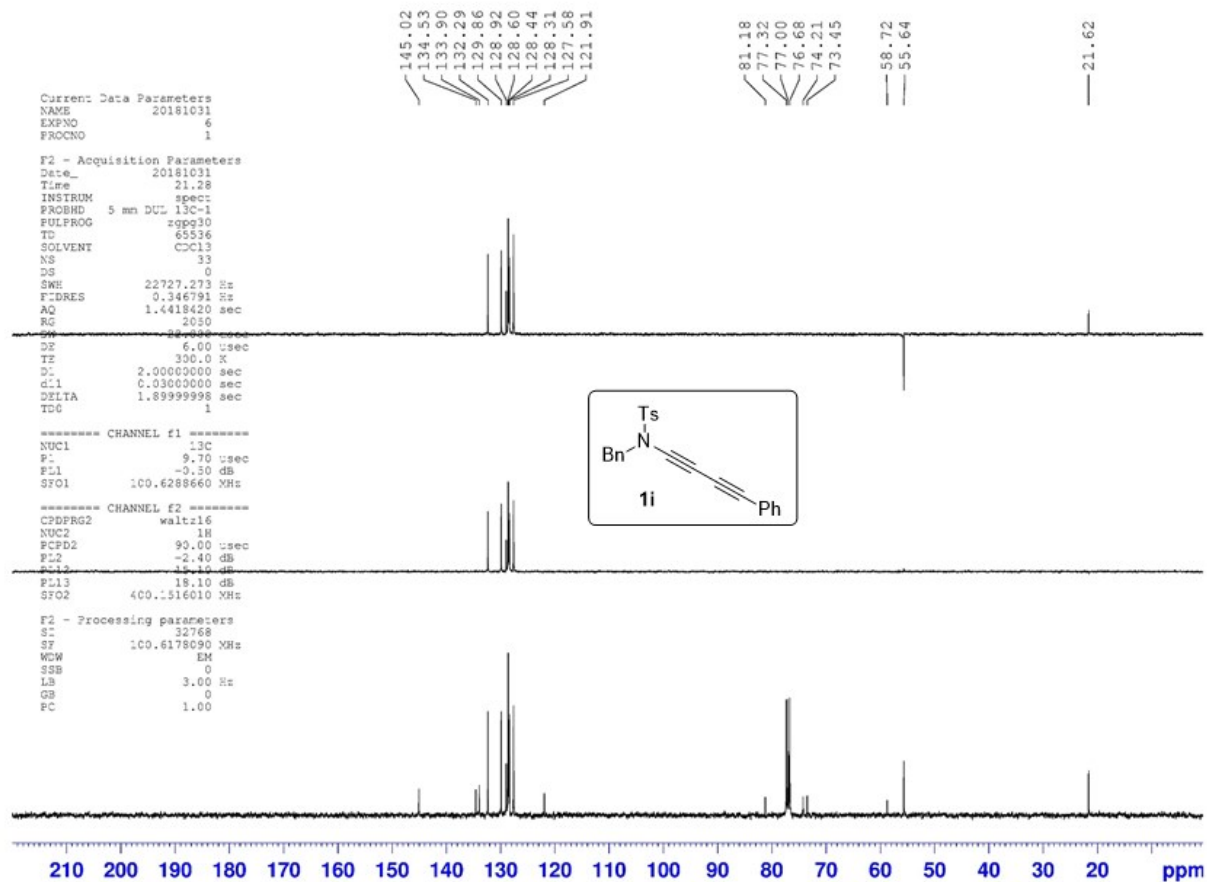

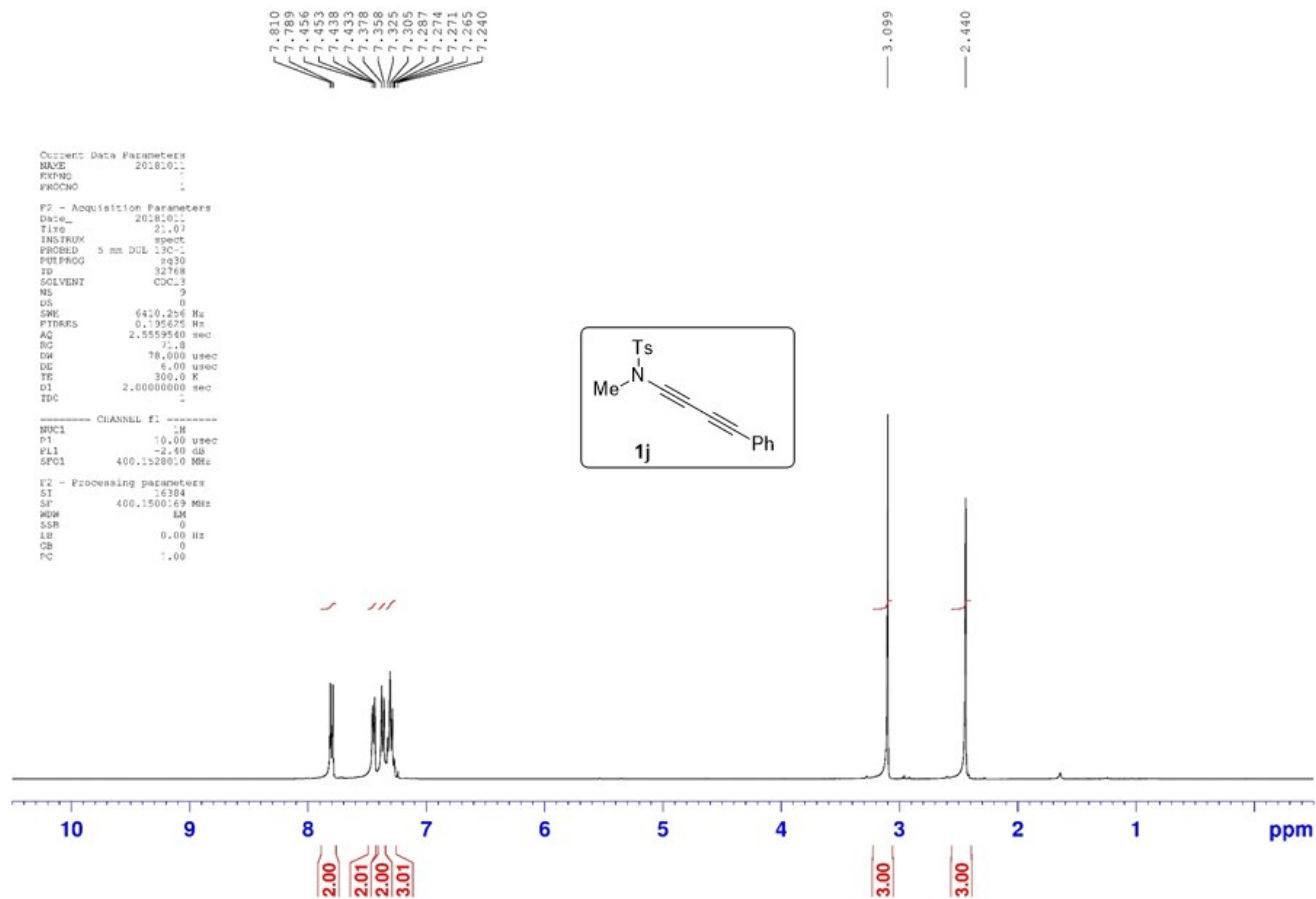

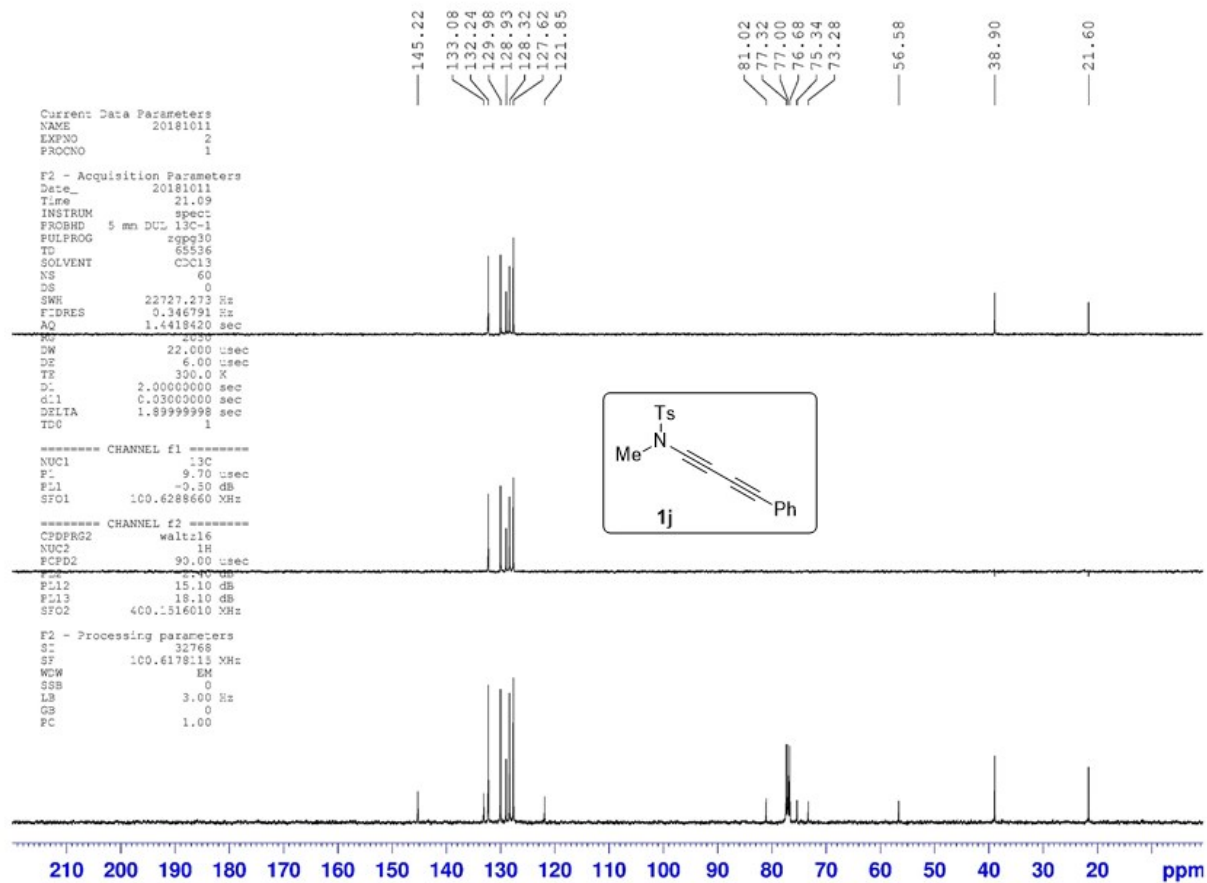

```

Current Data Parameters
NAME      tina-2-138
EXPNO    1
PROCNO   1

F2 - Acquisition Parameters
Date_    20200511
Time     20.10
INSTRUM  spect
PROBHD   5 mm DDL 13C-1
PULPROG  zg30
ID       32768
SOLVENT  CDCl3
NS       7
DS       0
SWH      6410.256 Hz
FIDRES   0.195625 Hz
AQ       2.5599039 sec
RG       256
DM       78.000 usec
DE       6.00 usec
TE       300.0 K
D1       2.00000000 sec
TD0      1

----- CHANNEL f1 -----
NUC1      13
P1       19.00 usec
PL1      -2.40 dB
SFO1     400.1528010 MHz

F2 - Processing parameters
SI       16384
SF       400.150114 MHz
WDW      EM
SSB      0
LB       0 Hz
GB       0
PC       1.00

```

7.811  
7.791  
7.464  
7.444  
7.364  
7.343  
7.325  
7.308  
7.289  
7.274  
7.267  
7.239

3.362  
3.344  
3.326

2.440  
1.667  
1.649  
1.630  
1.612  
1.593  
1.576  
1.371  
1.353  
1.334  
1.315  
1.297  
1.279  
0.913  
0.895  
0.877

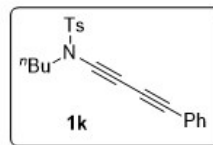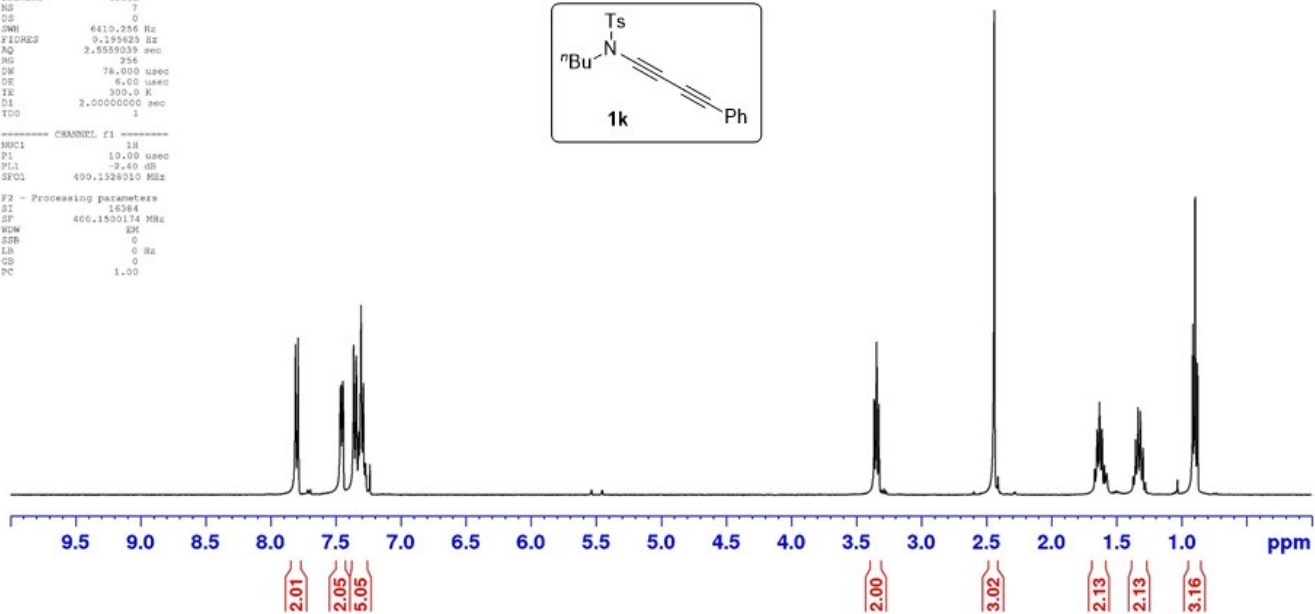



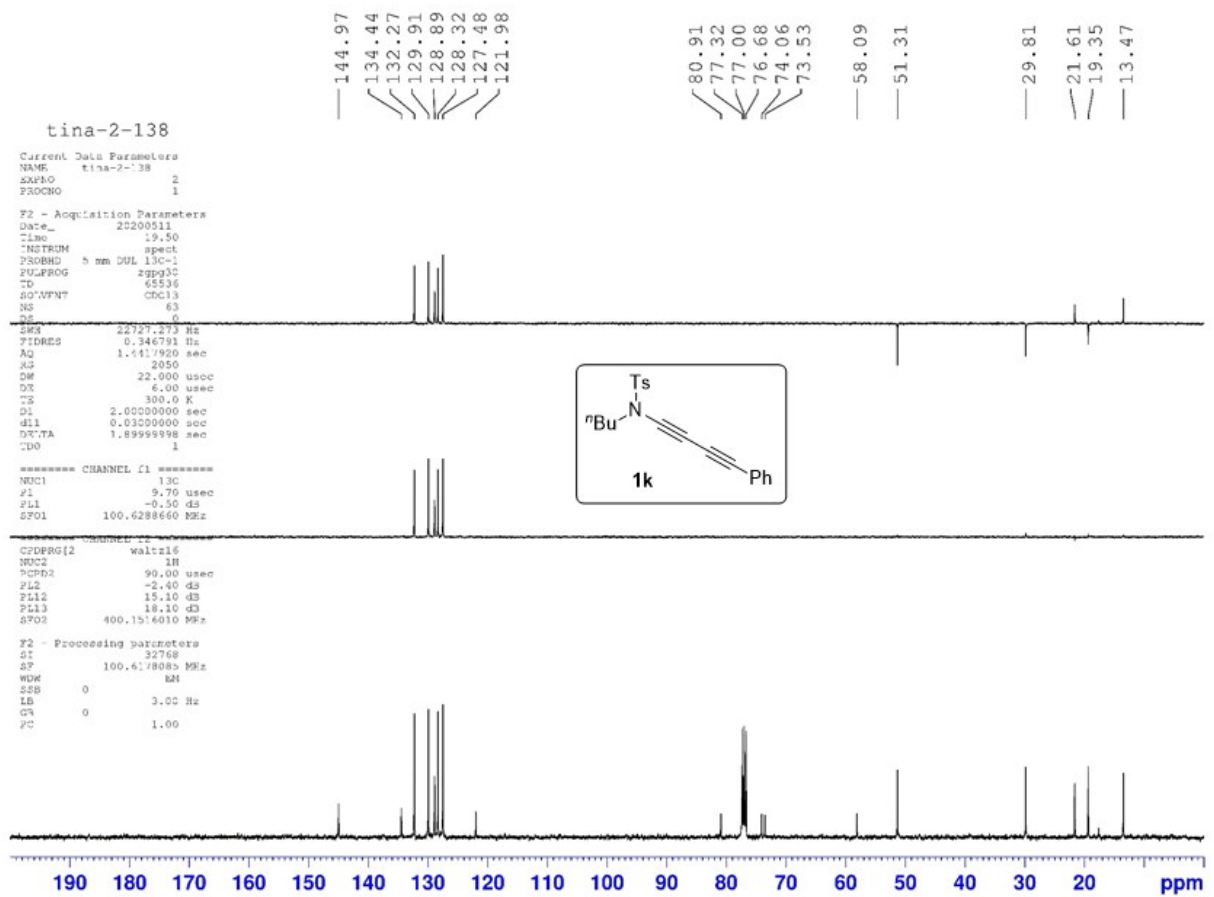

7.849  
7.835  
7.825  
7.816  
7.808  
7.793  
7.783  
7.775  
7.761  
7.753  
7.747  
7.737  
7.725  
7.720  
7.719  
7.716  
7.713  
7.711  
7.705  
7.704  
7.702  
7.695  
7.692  
7.683  
7.681  
7.677  
7.670  
7.640

2.805  
2.800  
2.794  
2.788  
2.782  
2.771  
2.751  
1.558  
0.871  
0.870  
0.864  
0.863  
0.861  
0.857  
0.856  
0.855  
0.853  
0.849  
0.843  
0.842  
0.804  
0.802  
0.797  
0.794  
0.793  
0.792  
0.791  
0.785  
0.782  
0.779  
0.769  
0.768

Current Data Parameters  
 NAME YP-03-130  
 EXPNO 1  
 PROCNO 1

F2 - Acquisition Parameters  
 Date\_ 20191217  
 Time 12.14  
 INSTRUM spect  
 PROBHD 5 mm QNP 1H/1  
 PULPROG zg  
 TD 32768  
 SOLVENT CDC13  
 NS 32  
 DS 0  
 SWH 9541.984 Hz  
 FIDRES 0.291198 Hz  
 AQ 1.7170932 sec  
 RG 512  
 DW 52.400 usec  
 DE 6.50 usec  
 TE 296.1 K  
 D1 2.00000000 sec  
 MCREST 0 sec  
 MCWRK 0.01500000 sec

===== CHANNEL f1 =====  
 NUC1 1H  
 P1 10.15 usec  
 PL1 -1.00 dB  
 SFO1 598.1027204 MHz

F2 - Processing parameters  
 SI 32768  
 SF 598.1000310 MHz  
 WDW no  
 SSB 0  
 LB 0 Hz  
 GB 0  
 PC 2.00

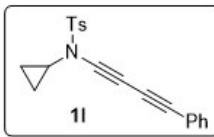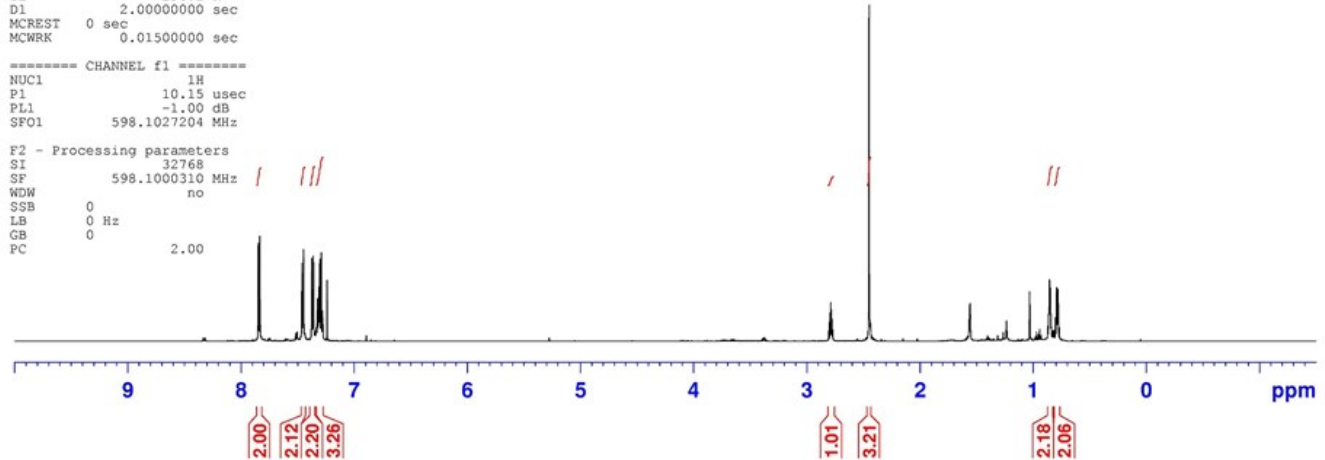

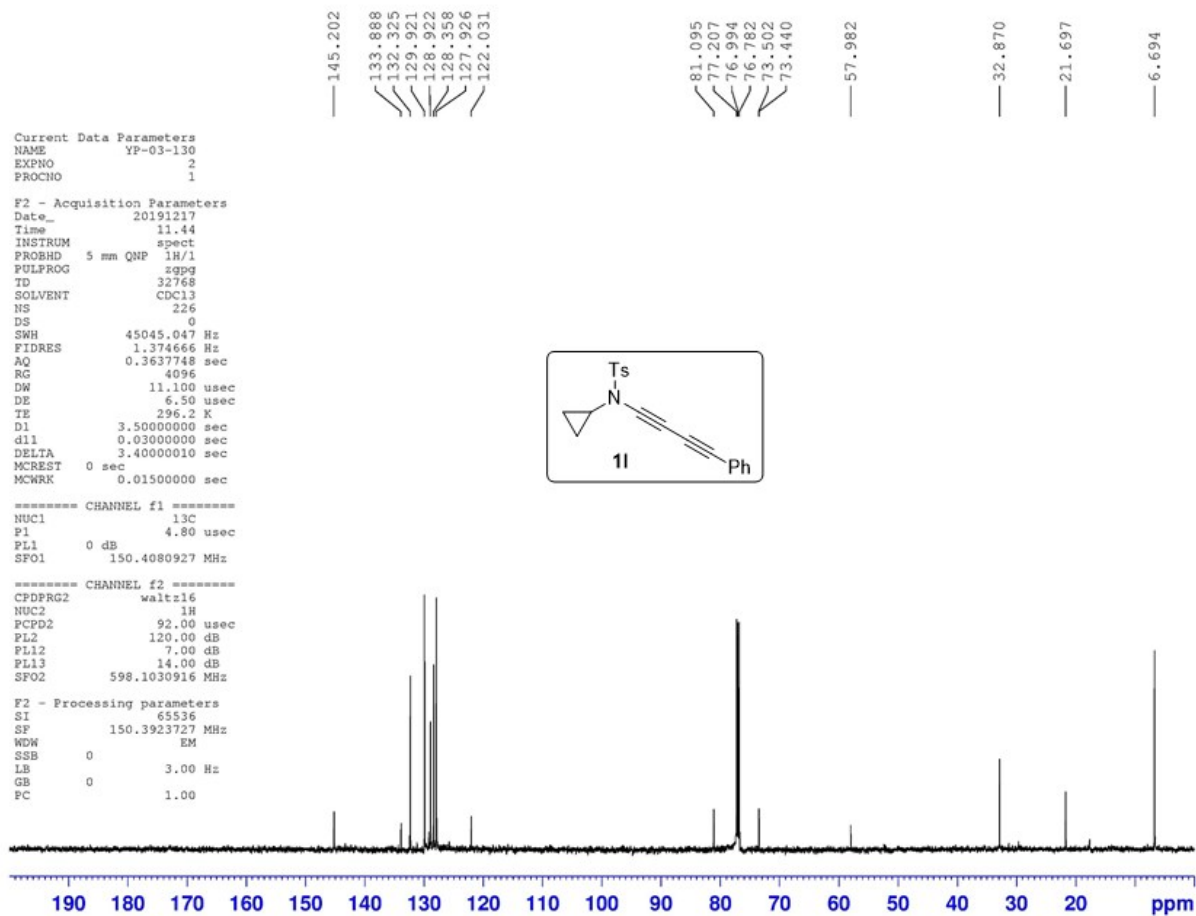

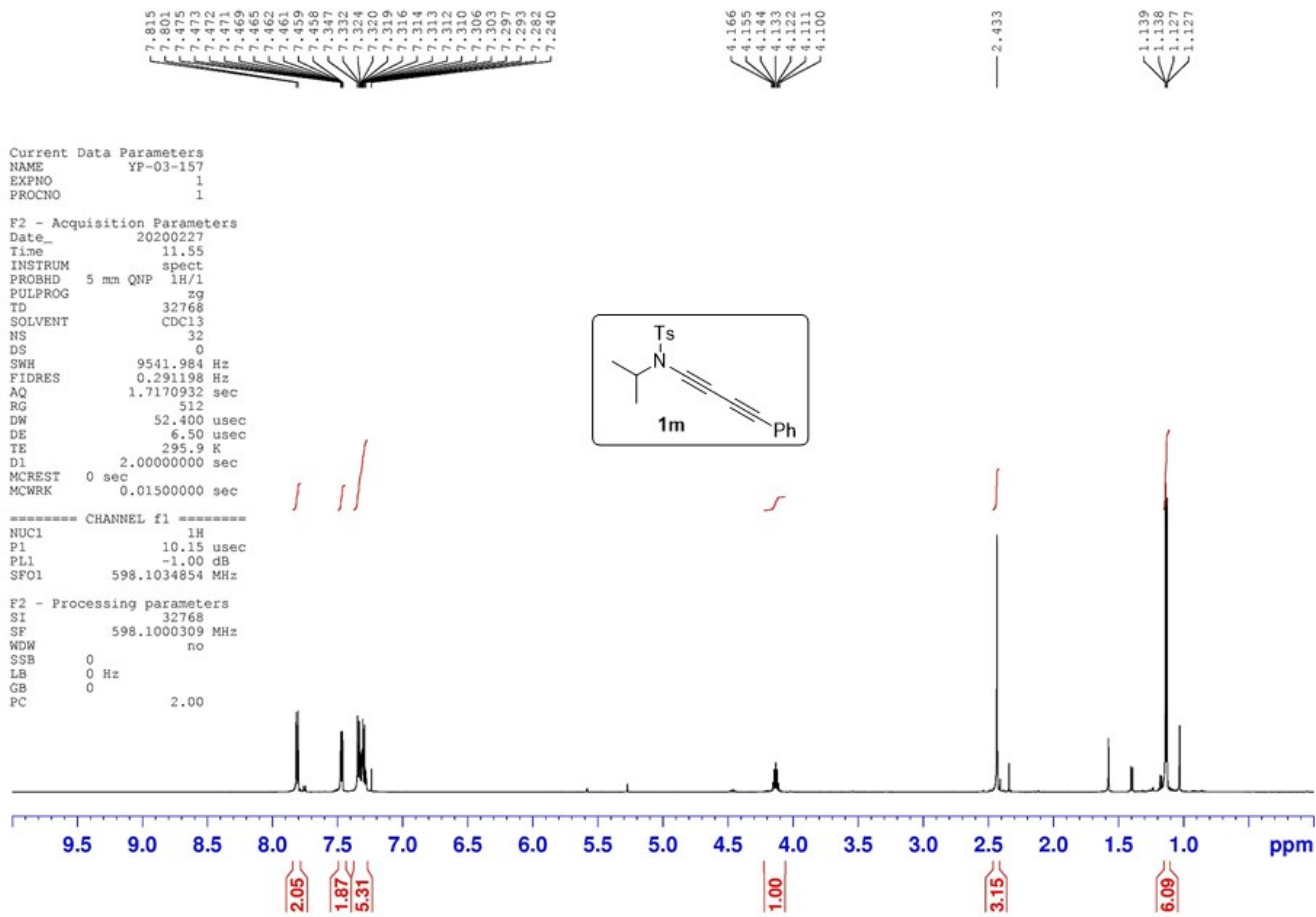

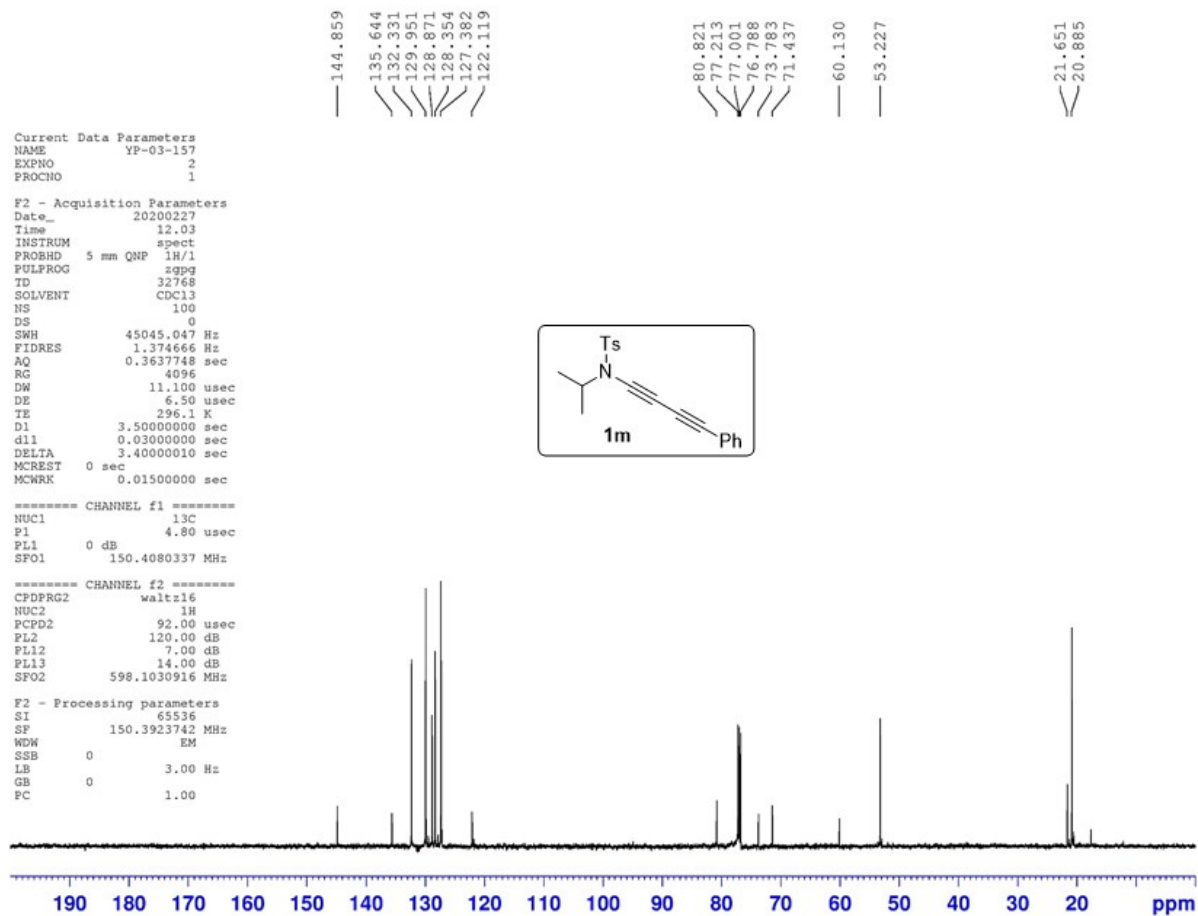

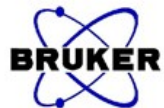

tina-2-41

```
Current Data Parameters
NAME      20200120
EXPNO     1
PROCNO    1

F2 - Acquisition Parameters
Date_     20200120
Time      22.09
INSTRUM   spect
PROBHD    5 mm DUL 13C-1
PULPROG   zg30
TD        32768
SOLVENT   CDCl3
NS         9
DS         0
SWH        6410.256 Hz
FIDRES     0.195625 Hz
AQ         2.5559540 sec
RG         90.5
DM         78.000 usec
DE         6.00 usec
TE         300.0 K
D1         2.00000000 sec
TD0        1

----- CHANNEL f1 -----
NUC1       1H
P1         10.00 usec
PL1        -2.40 dB
SFO1       400.1528010 MHz

F2 - Processing parameters
SI         16384
SF         400.1500168 MHz
WDW        EM
SSB        0
LB         0.00 Hz
GB         0
PC         1.00
```

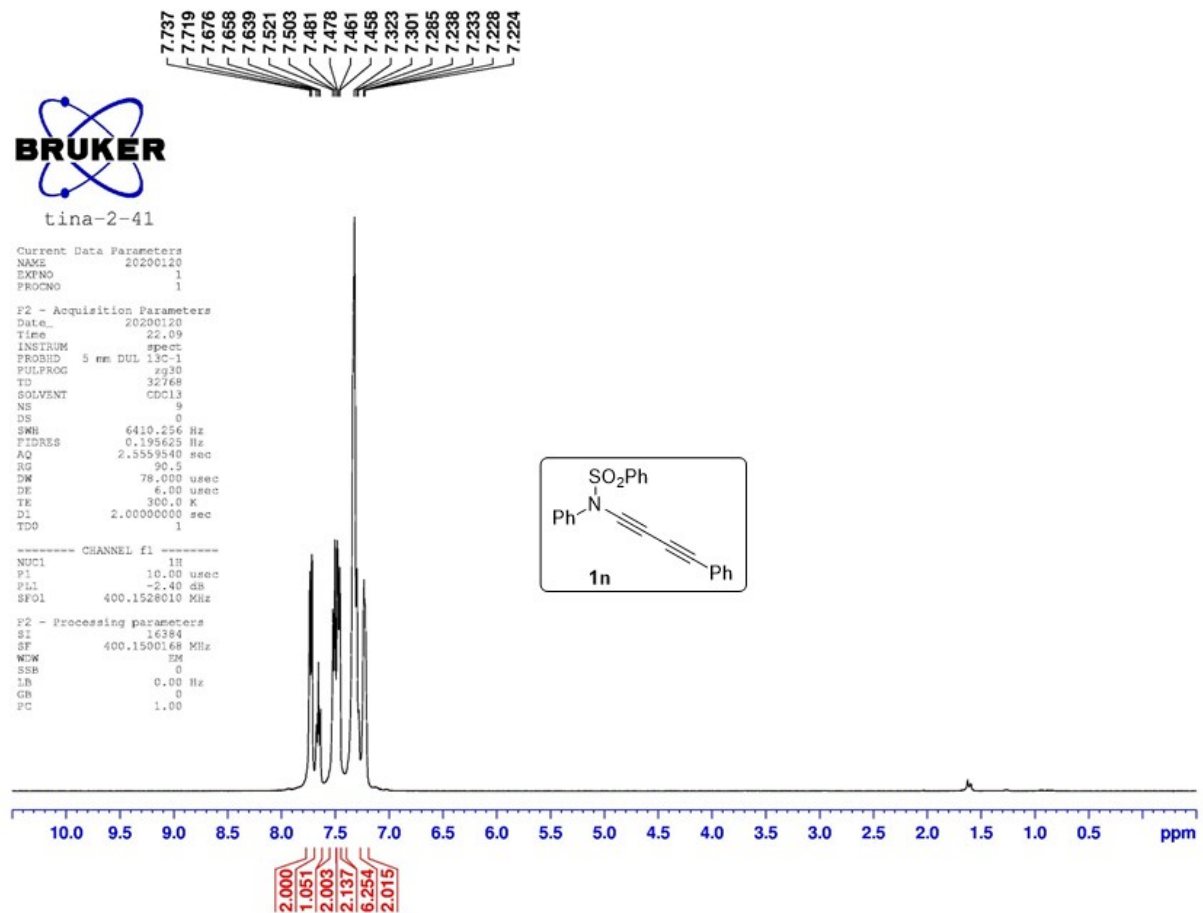

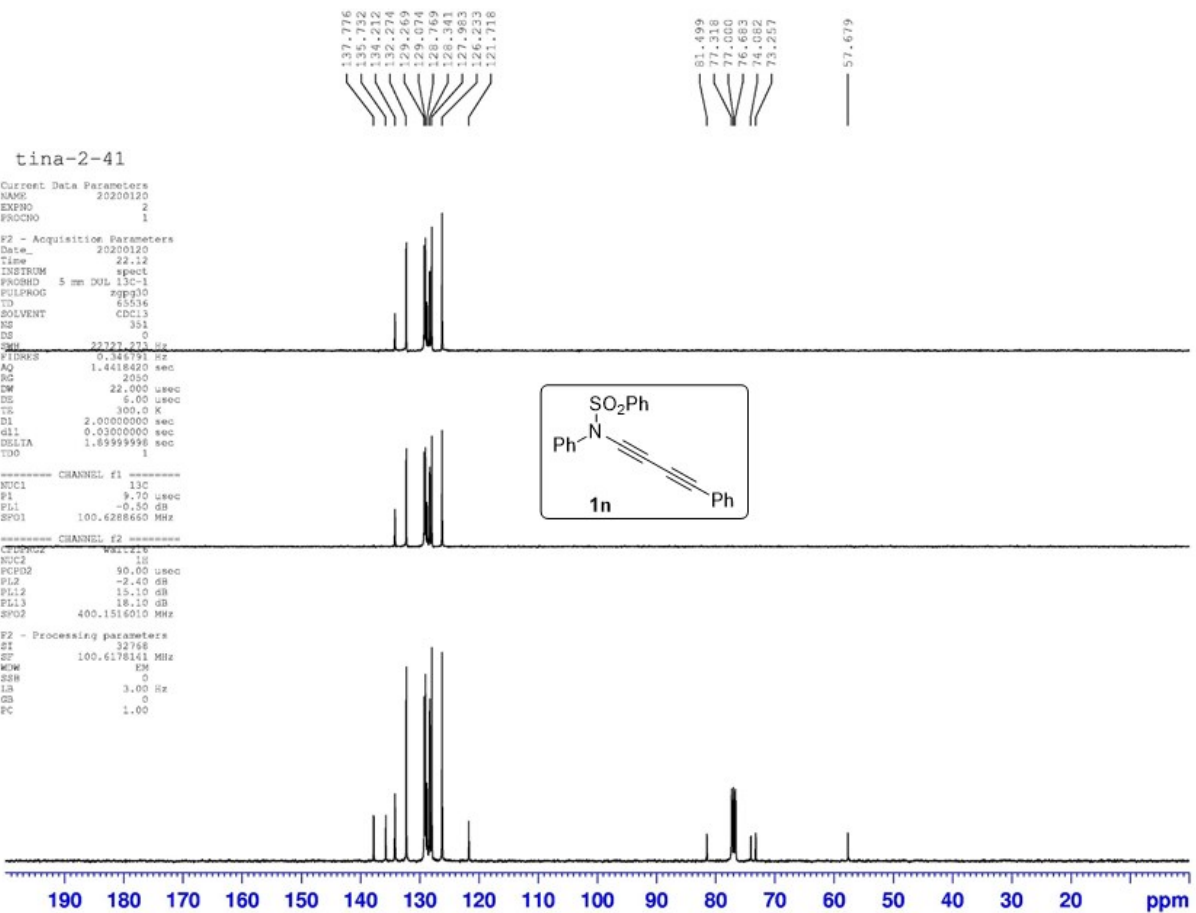

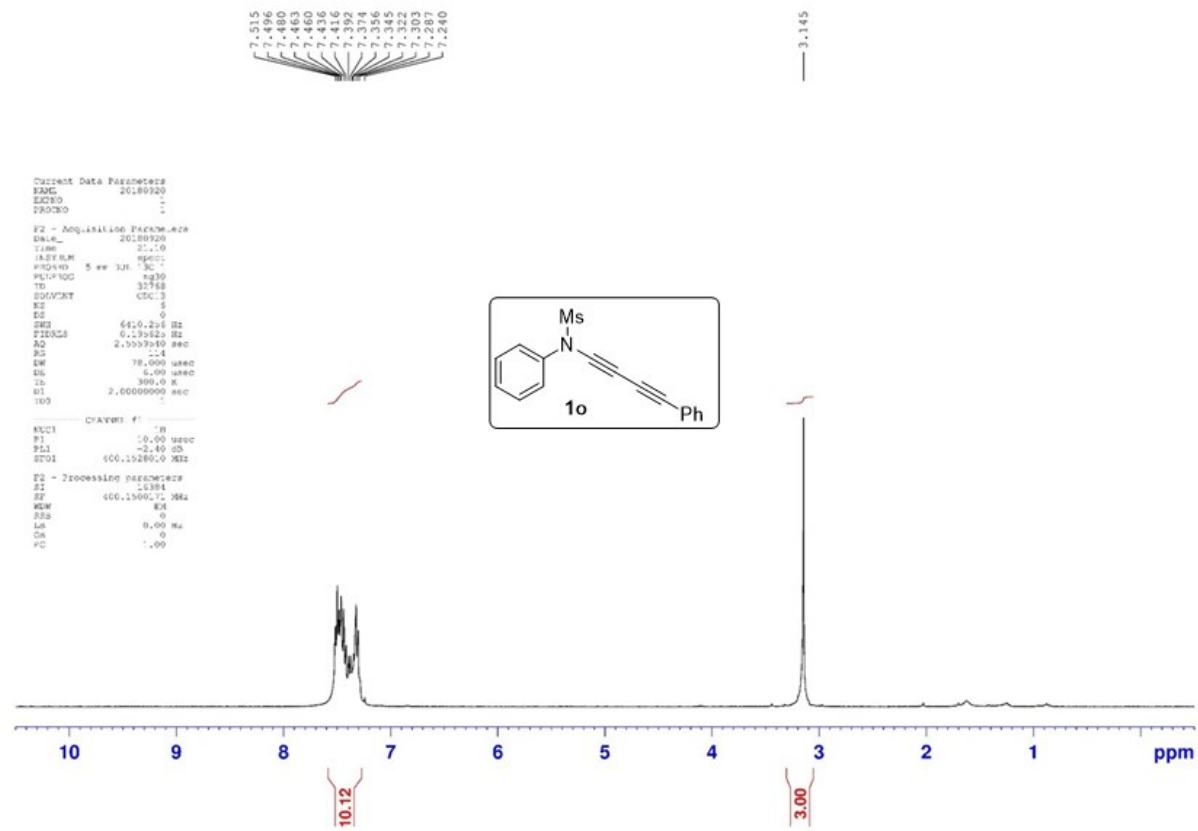



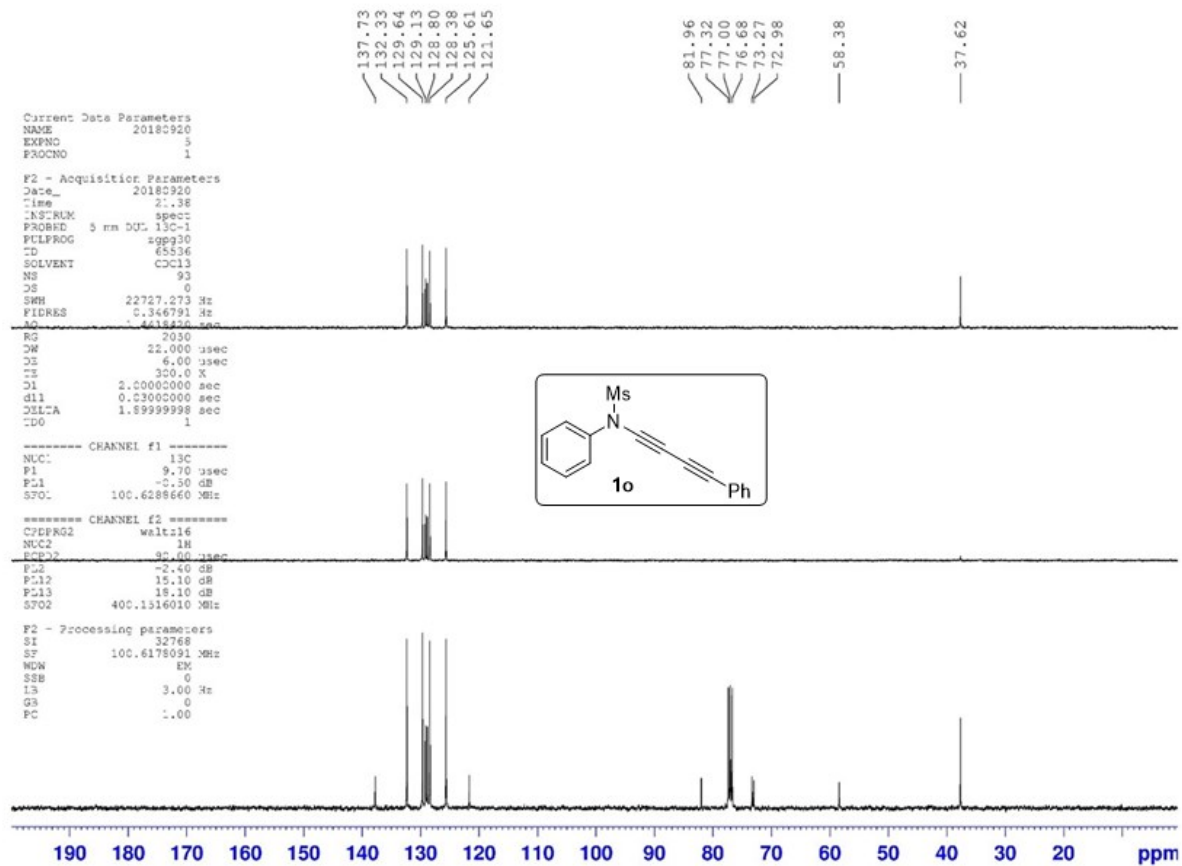

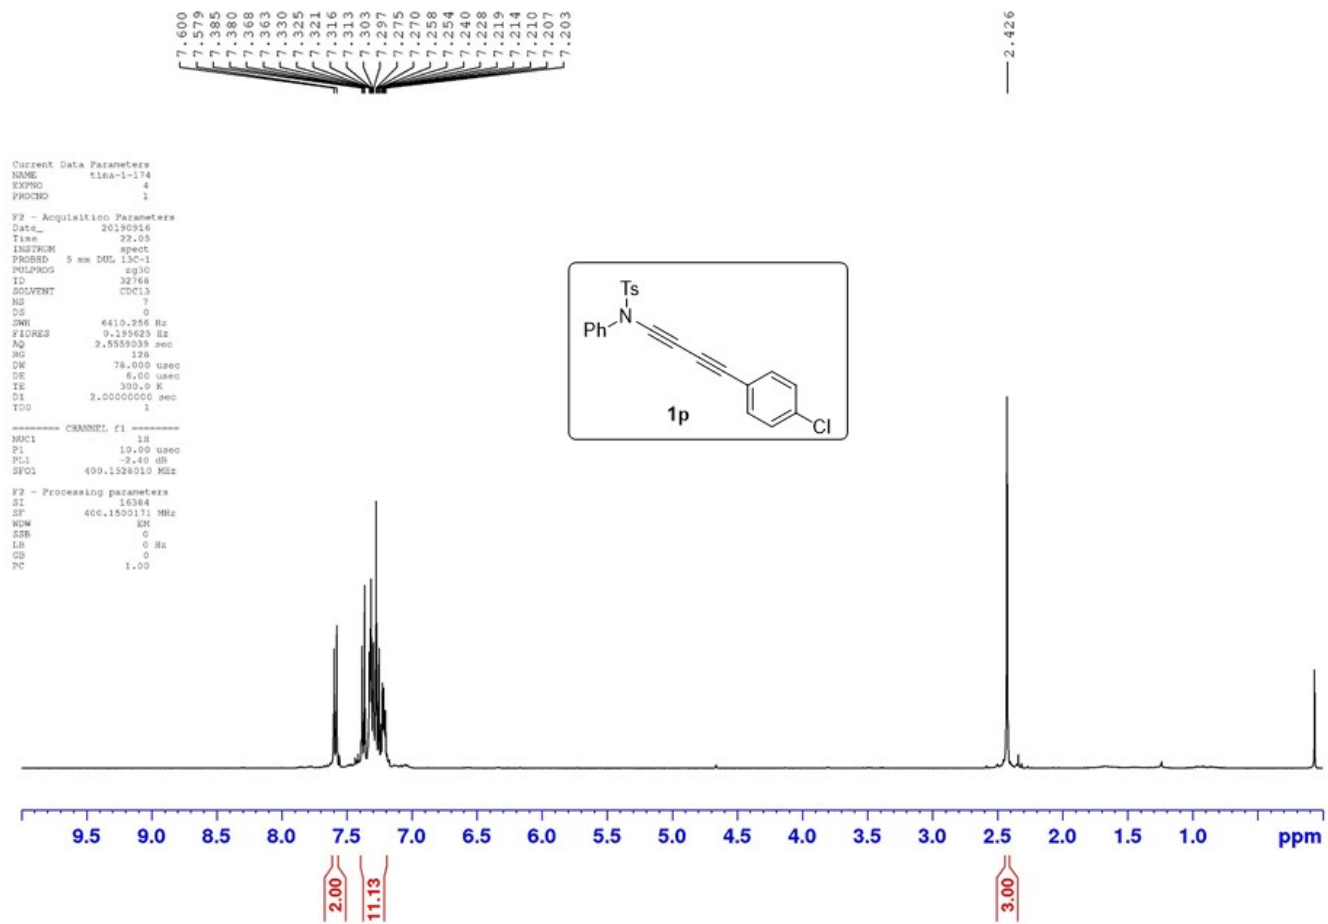

tina-1-174

Current Data Parameters  
NAME 20190916  
EXPNO 5  
PROCNO 1

F2 - Acquisition Parameters  
Date\_ 20190916  
Time 22.07  
INSTRUM spect  
PROBHD 5 mm DUL 13C-1  
PULPROG zgpg30  
TD 65536  
SOLVENT CDCl3  
NS 600  
DS 0  
SWH 22727.273 Hz  
FIDRES 0.346791 Hz  
AQ 1.4619420 sec  
RG 2050

DE 6.00 usec  
TE 300.0 K  
D1 2.00000000 sec  
d11 0.03000000 sec  
DELTA 1.89999998 sec  
TDO 1

----- CHANNEL f1 -----  
NUC1 13C  
P1 9.70 usec  
PL1 -0.50 dB  
SFO1 100.6288660 MHz

----- CHANNEL f2 -----  
CPDPRG2 waltz16  
NUC2 1H  
PCPD2 90.00 usec  
PL12 15.10 dB  
PL13 18.10 dB  
SFO2 400.1516010 MHz

F2 - Processing parameters  
SI 32768  
SF 100.6178049 MHz  
WDW EM  
SSB 0  
LB 3.00 Hz  
GB 0  
PC 1.00

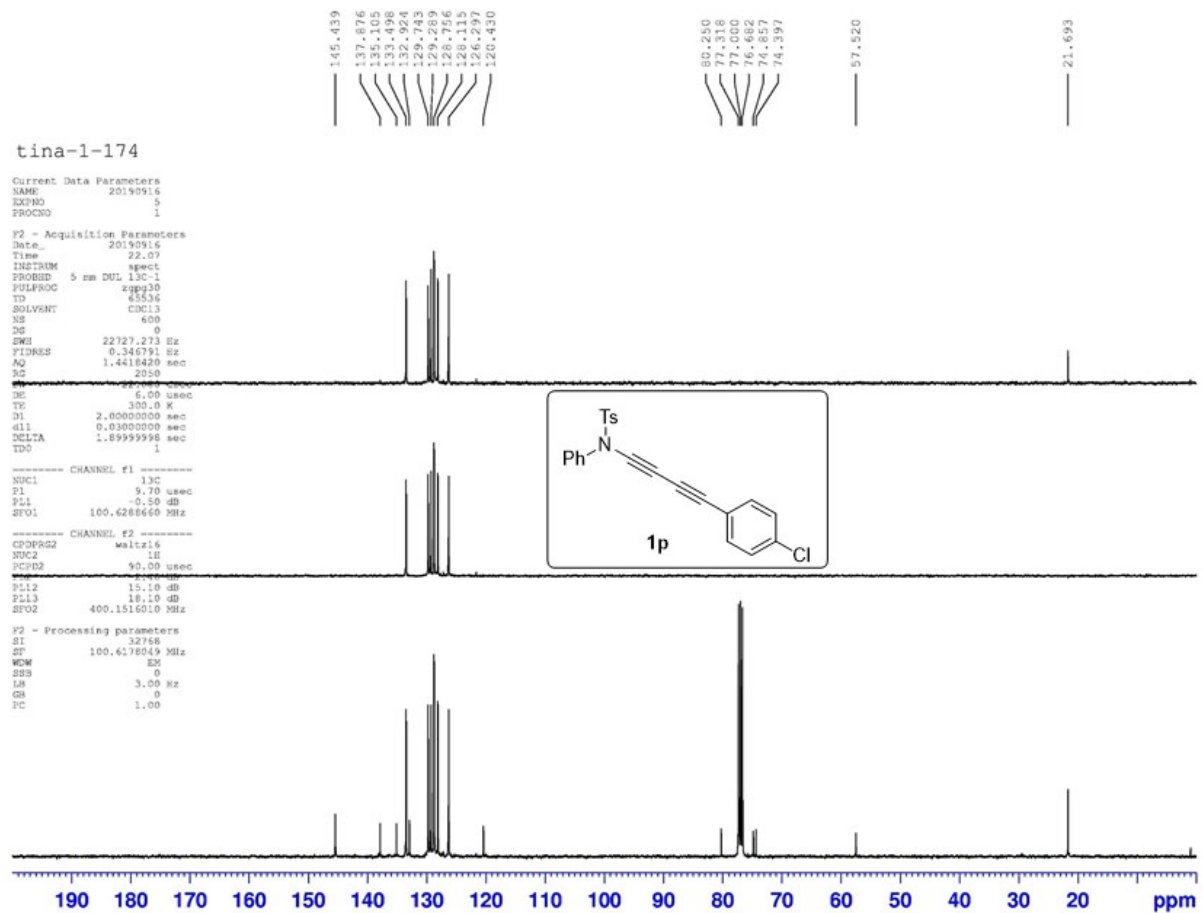

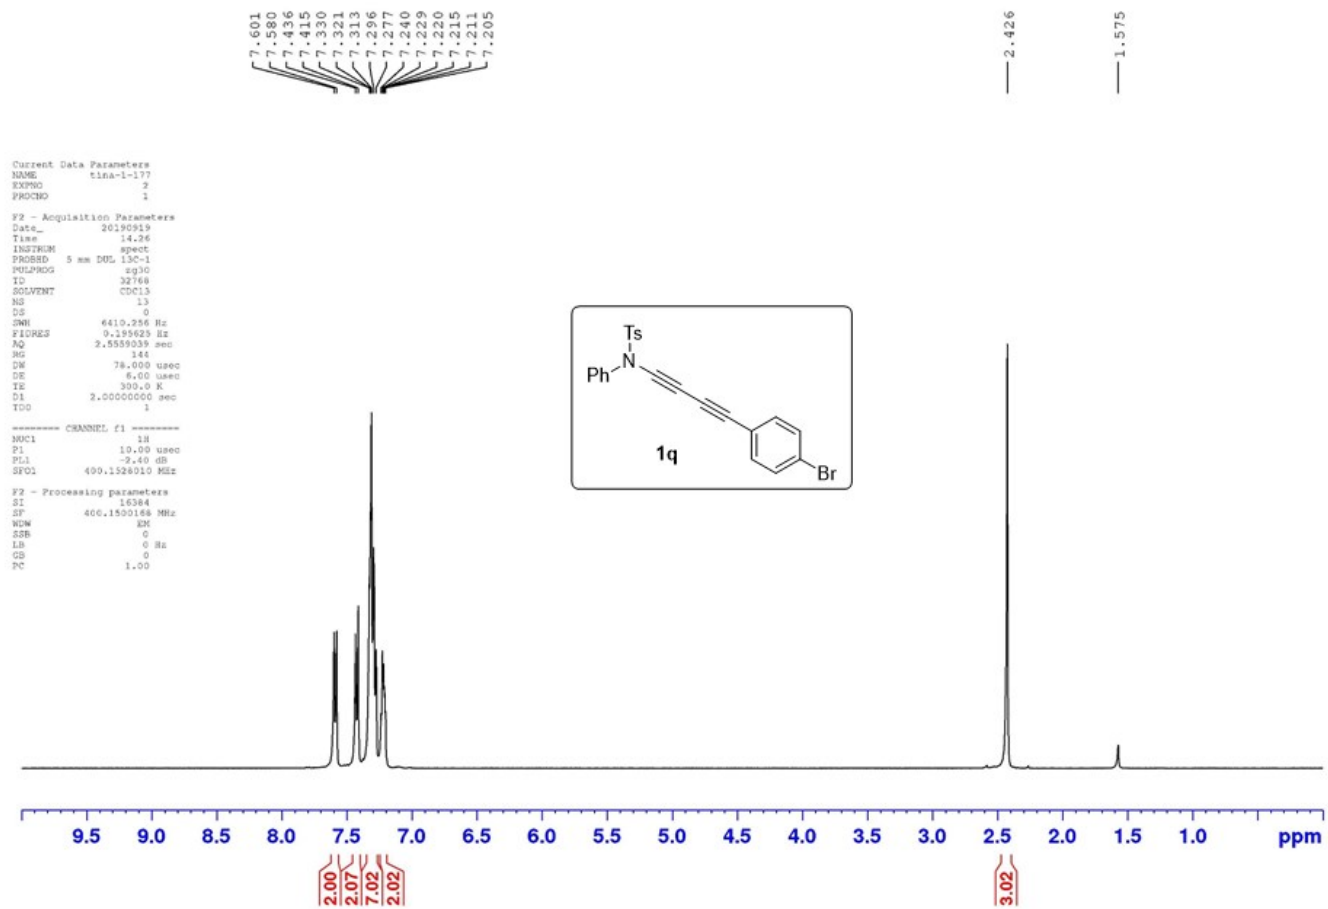

Tina-1-177

```
Current Data Parameters
NAME      20190919
EXPNO     4
PROCNO    1

F2 - Acquisition Parameters
Date_     20190919
Time      15.54
INSTRUM   spect
PROBHD    5 mm DUL 13C-1
PULPROG   zgpg30
TD        65536
SOLVENT   CDCl3
NS        184
DS        0
SWH       22727.273 Hz
FIDRES    0.346791 Hz
AQ        1.4619420 sec
RG         384
DM        22.000 usec
DE        6.00 usec
TE        300.0 K
D1        2.00000000 sec
d11       0.03000000 sec
DELTA     1.89999998 sec
TDO       1

----- CHANNEL f1 -----
NUC1       13C
P1         9.70 usec
PL1        -0.50 dB
SFO1       100.6288660 MHz

----- CHANNEL f2 -----
CPDPRG2   waltz16
NUC2       1H
PCPD2     90.00 usec
PL2        -2.40 dB
PL12       19.00 dB
PL13       18.10 dB
SFO2       400.1516010 MHz

F2 - Processing parameters
SI         32768
SF         100.6178053 MHz
WDW        EM
SSB        0
LH         3.00 Hz
GB         0
PC         1.00
```

145.443  
137.860  
133.648  
132.927  
131.674  
129.746  
129.291  
128.749  
128.193  
127.637  
126.889  
126.394

80.317  
77.338  
77.000  
76.662  
74.583

57.554

21.695

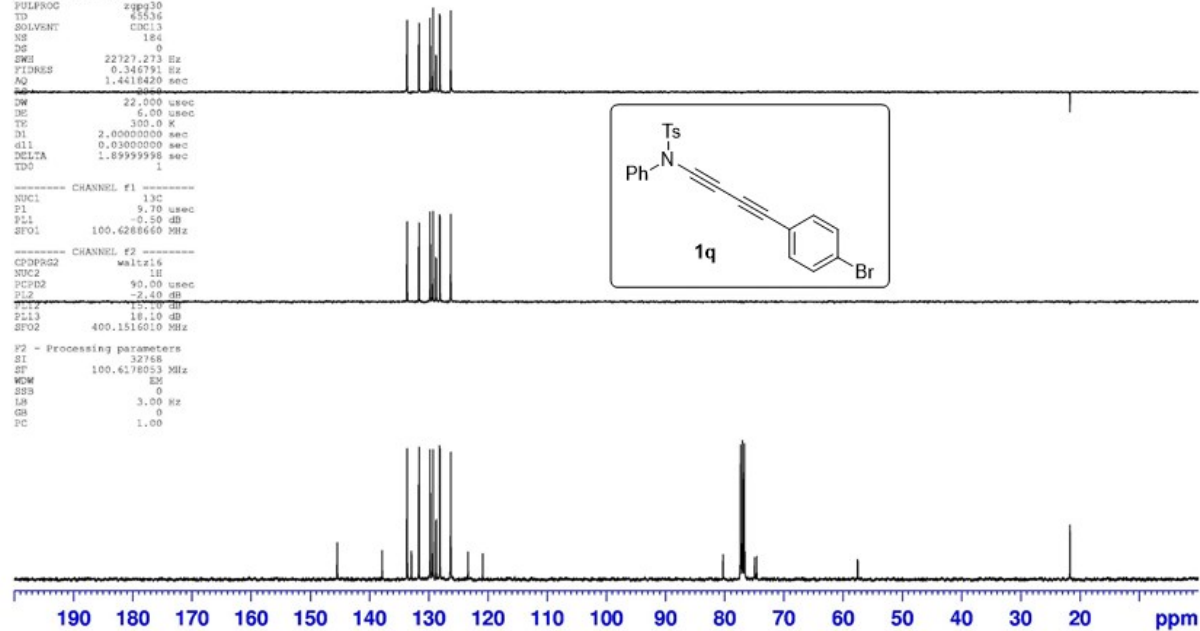

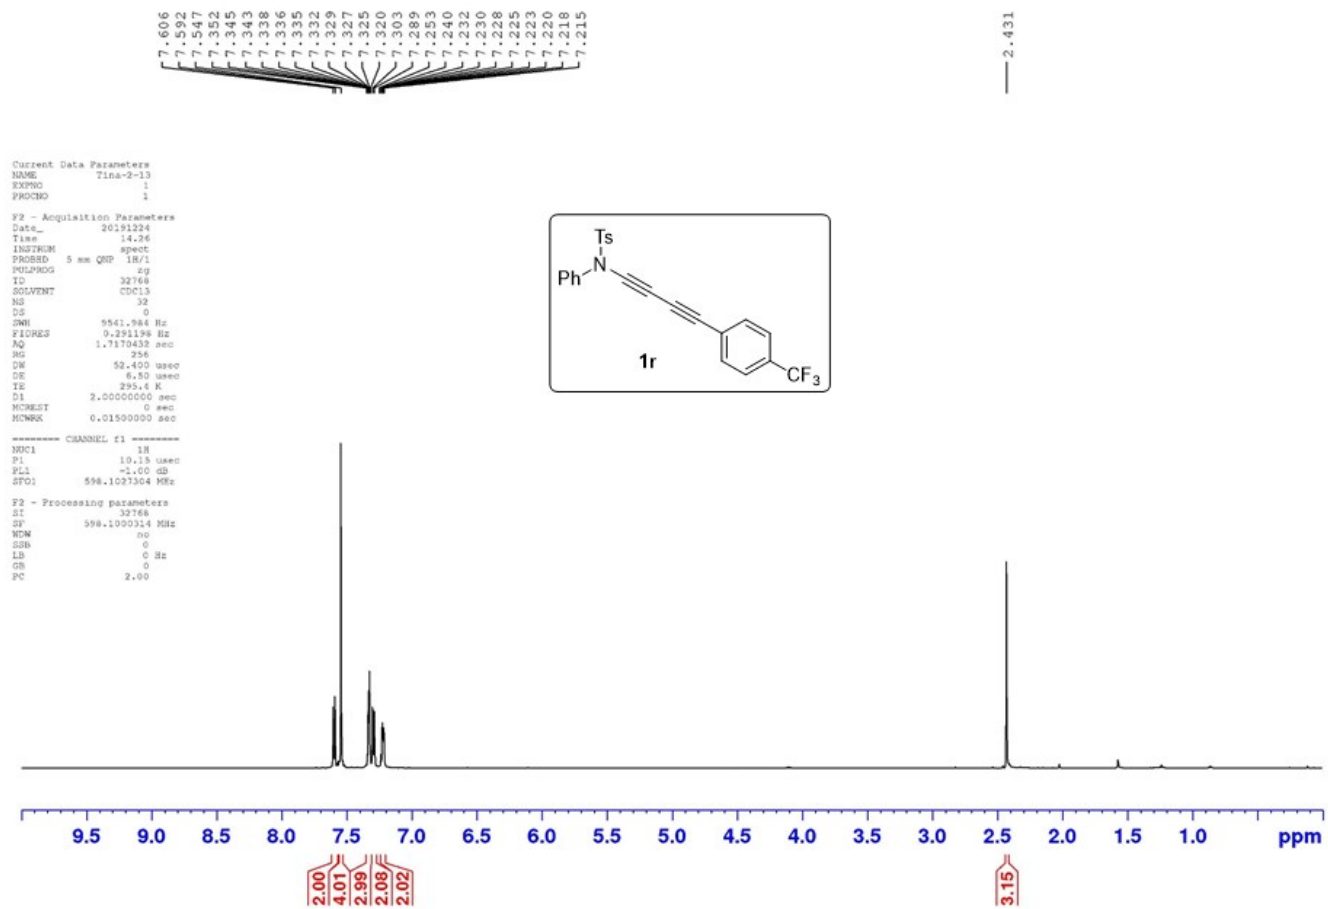

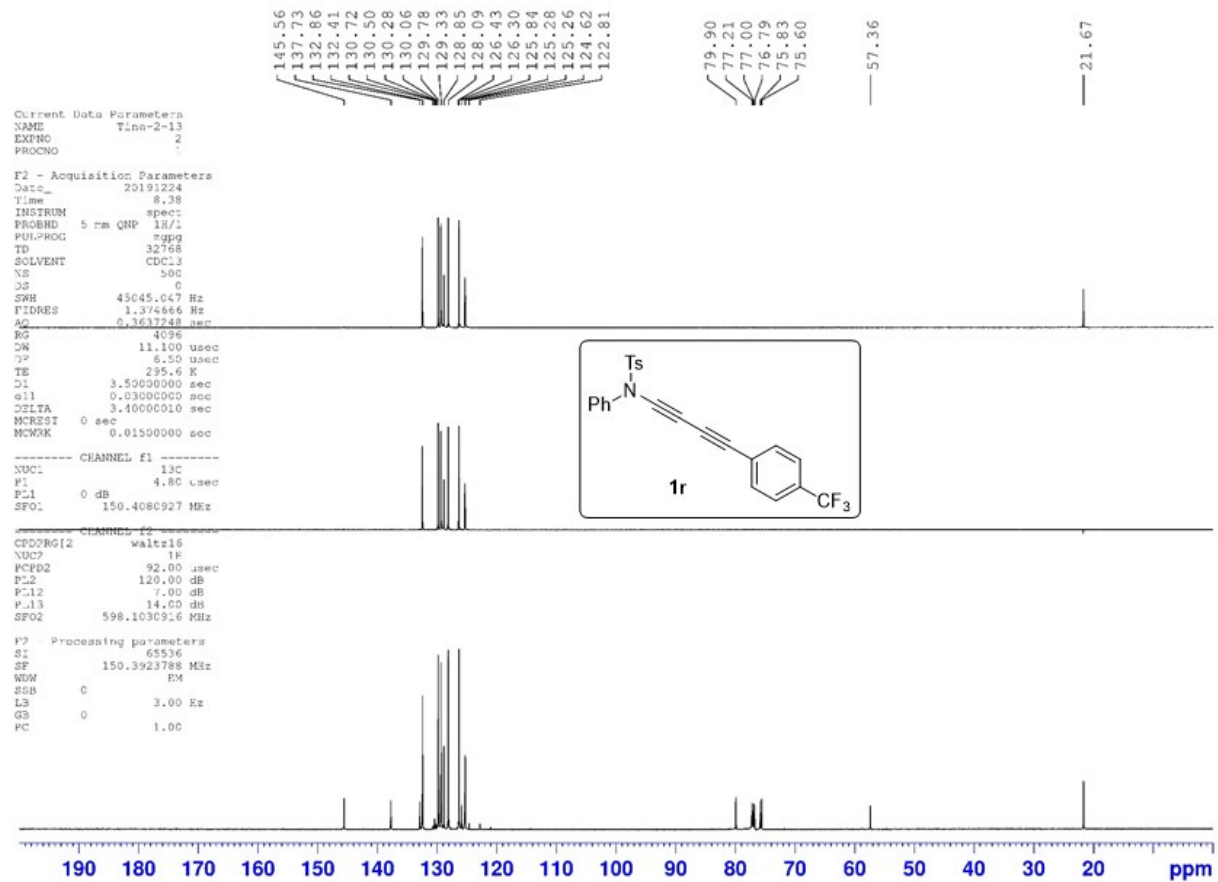

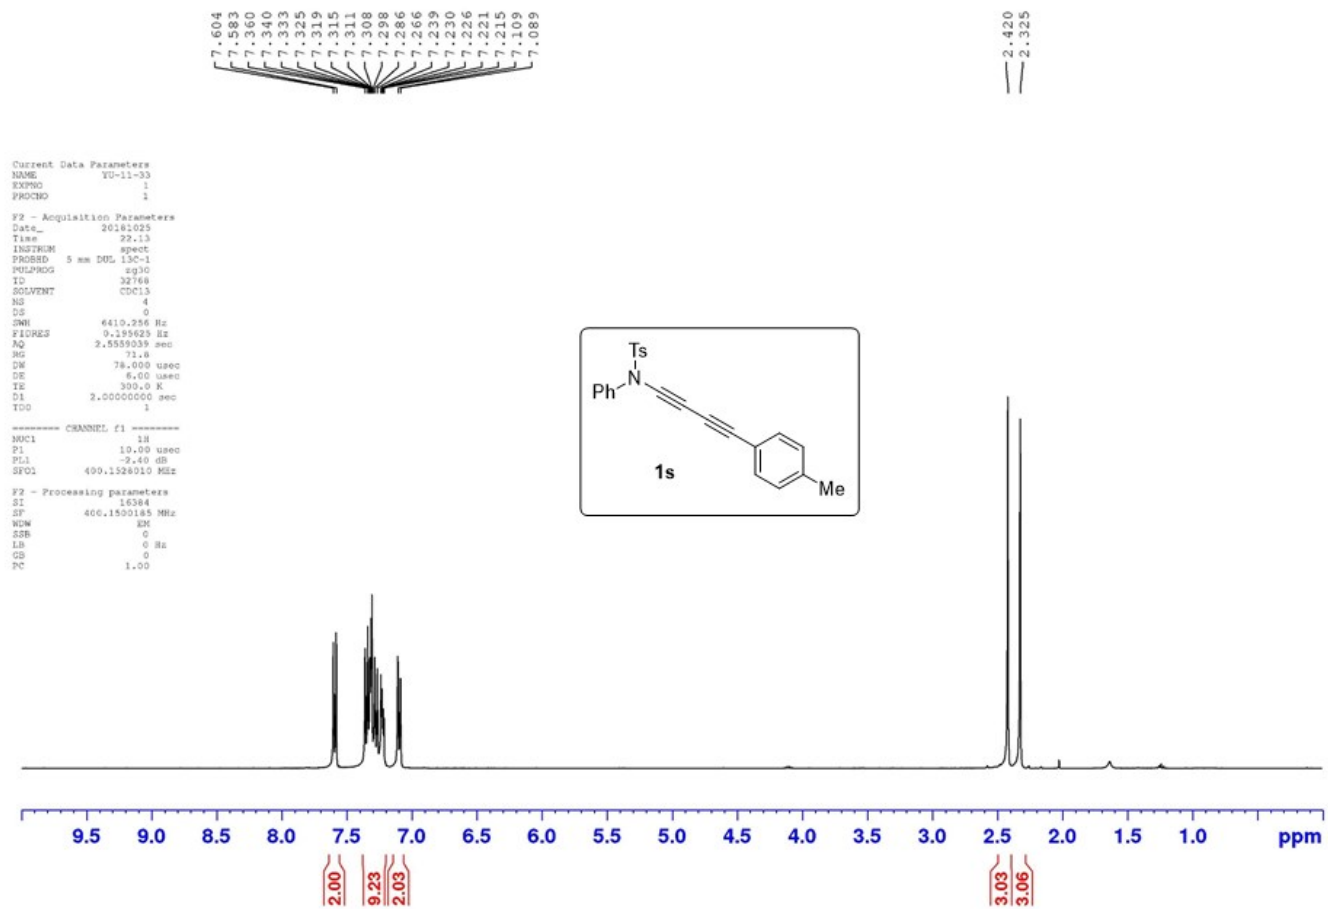



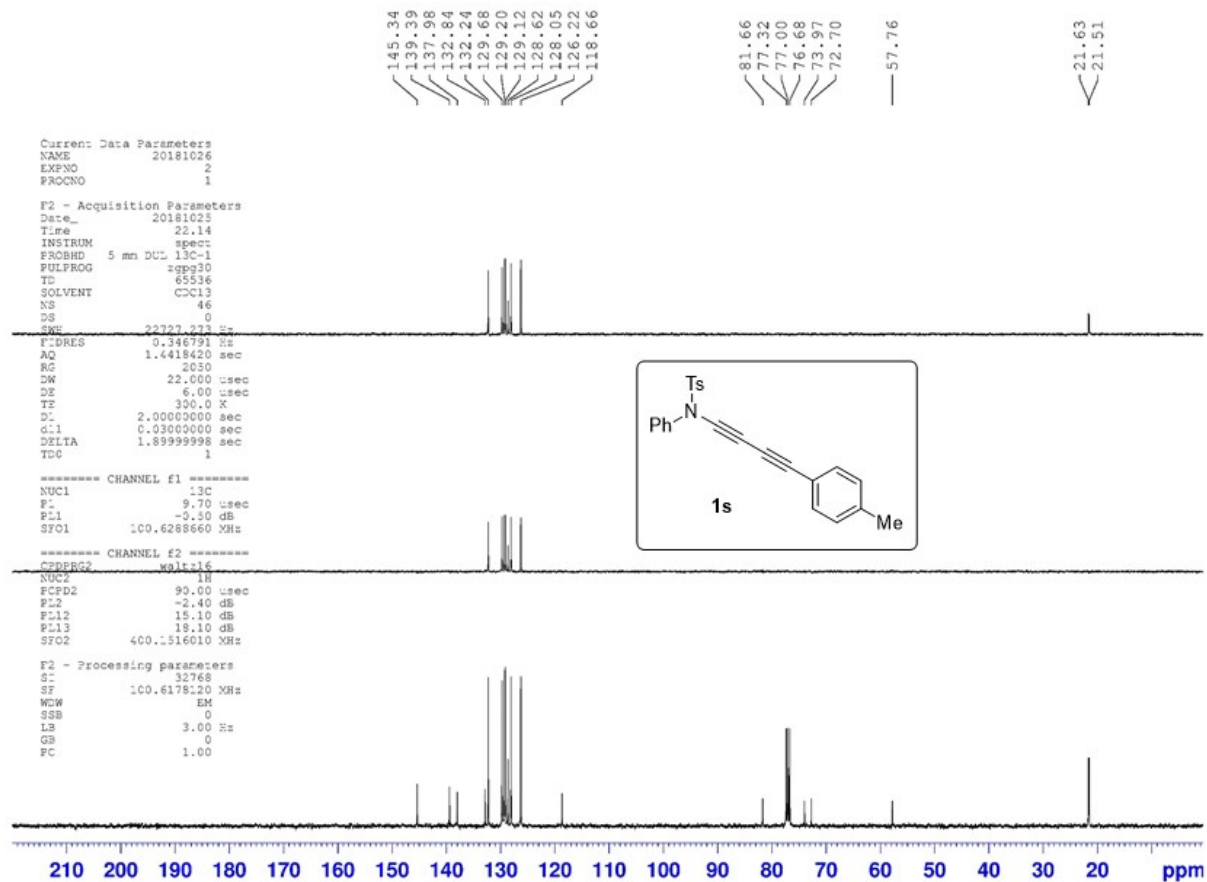

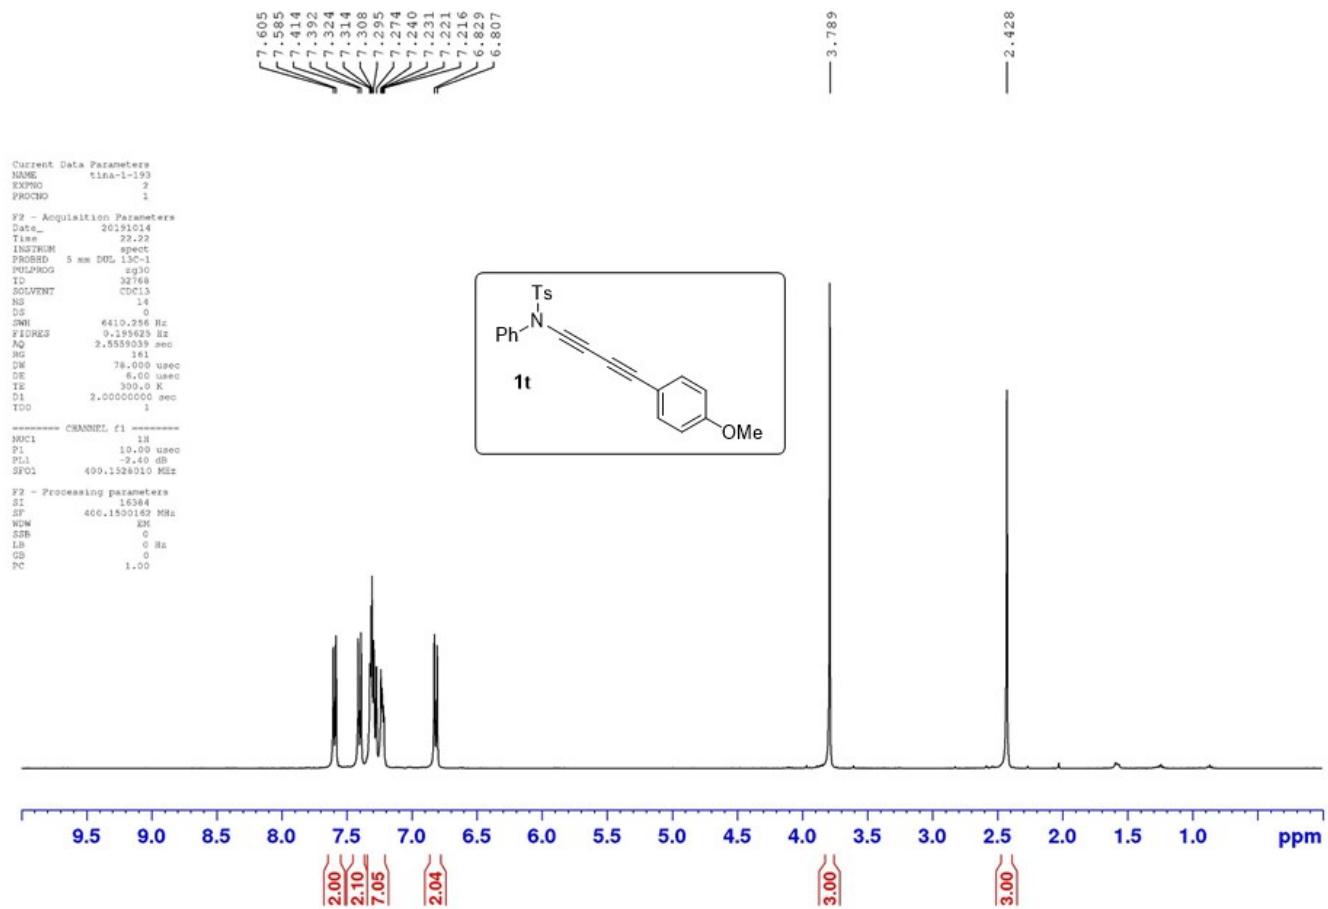

tina-1-193

```
Current Data Parameters
NAME      20191014
EXPNO    10
PROCNO   1

F2 - Acquisition Parameters
Date_    20191014
Time     22.31
INSTRUM  spect
PROBHD   5 mm DUL 13C-1
PULPROG  zgpg30
TD       65536
SOLVENT  CDCl3
NS       210
DS       0
SWH      22727.273 Hz
AQ       1.4418470 sec
RG       2050
DM       22.000 usec
DE       6.00 usec
TE       300.0 K
D1       2.00000000 sec
d11      0.03000000 sec
DELTA    1.89999998 sec
TD0      1

----- CHANNEL f1 -----
NUC1     13C
P1       9.70 usec
PL1      -0.50 dB
SFO1     100.6288660 MHz

----- CHANNEL f2 -----
CPDPRG2  waltz16
NUC2     1H
PCPD2    90.00 usec
PL2      0.00 dB
PL12     15.10 dB
PL13     18.10 dB
SFO2     400.1516010 MHz

F2 - Processing parameters
SI       32768
SF       100.6178053 MHz
WDW      EM
SSB      0
LB       3.00 Hz
GB       0
PC       1.00
```

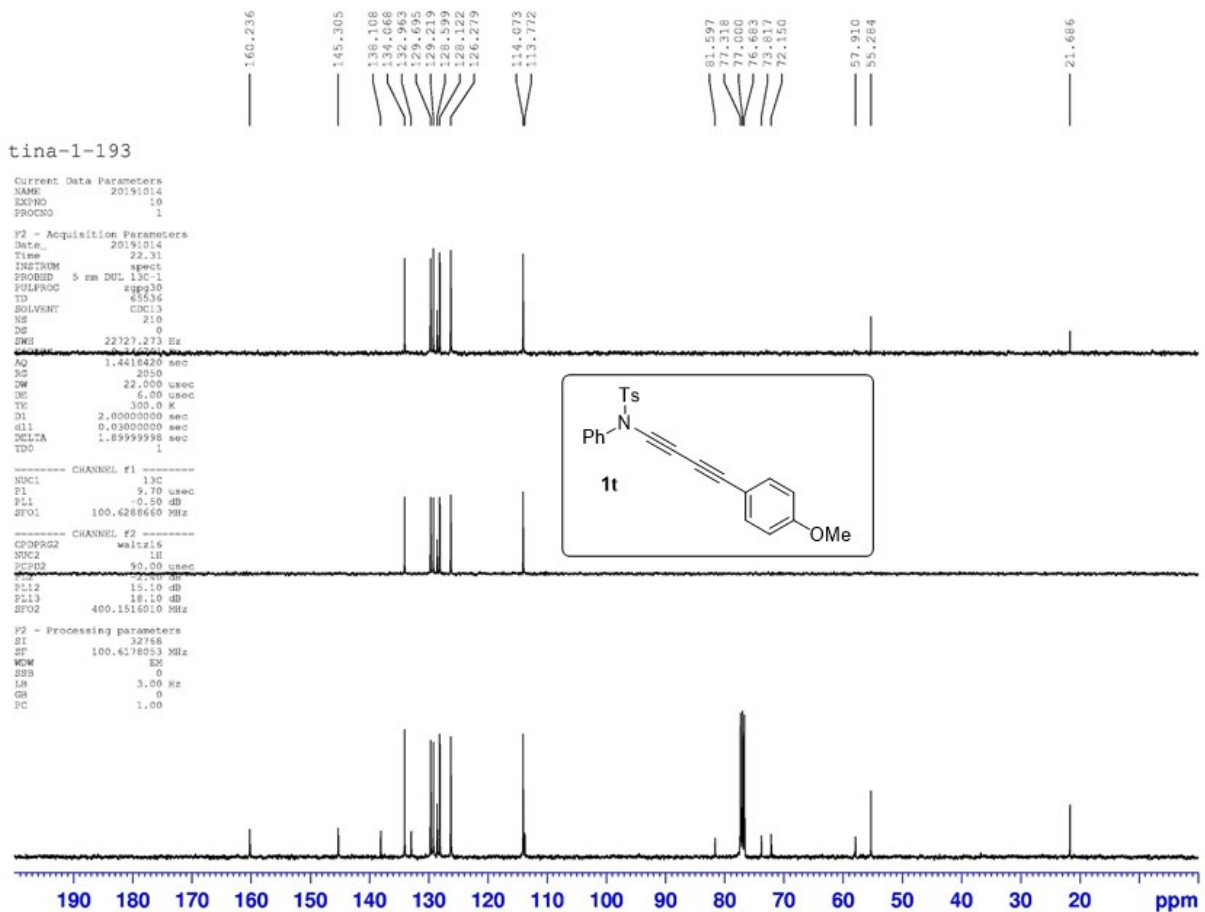

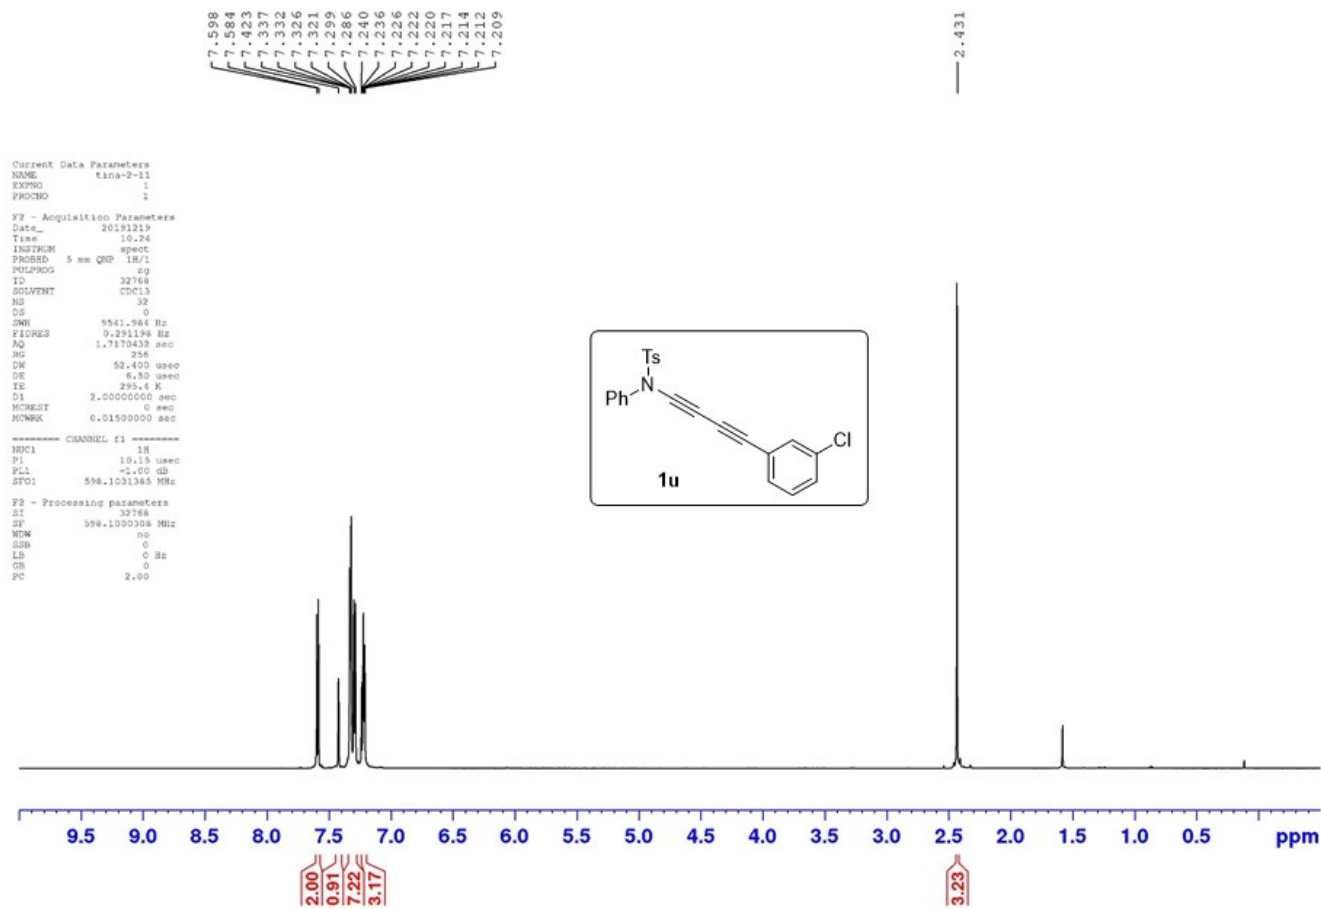

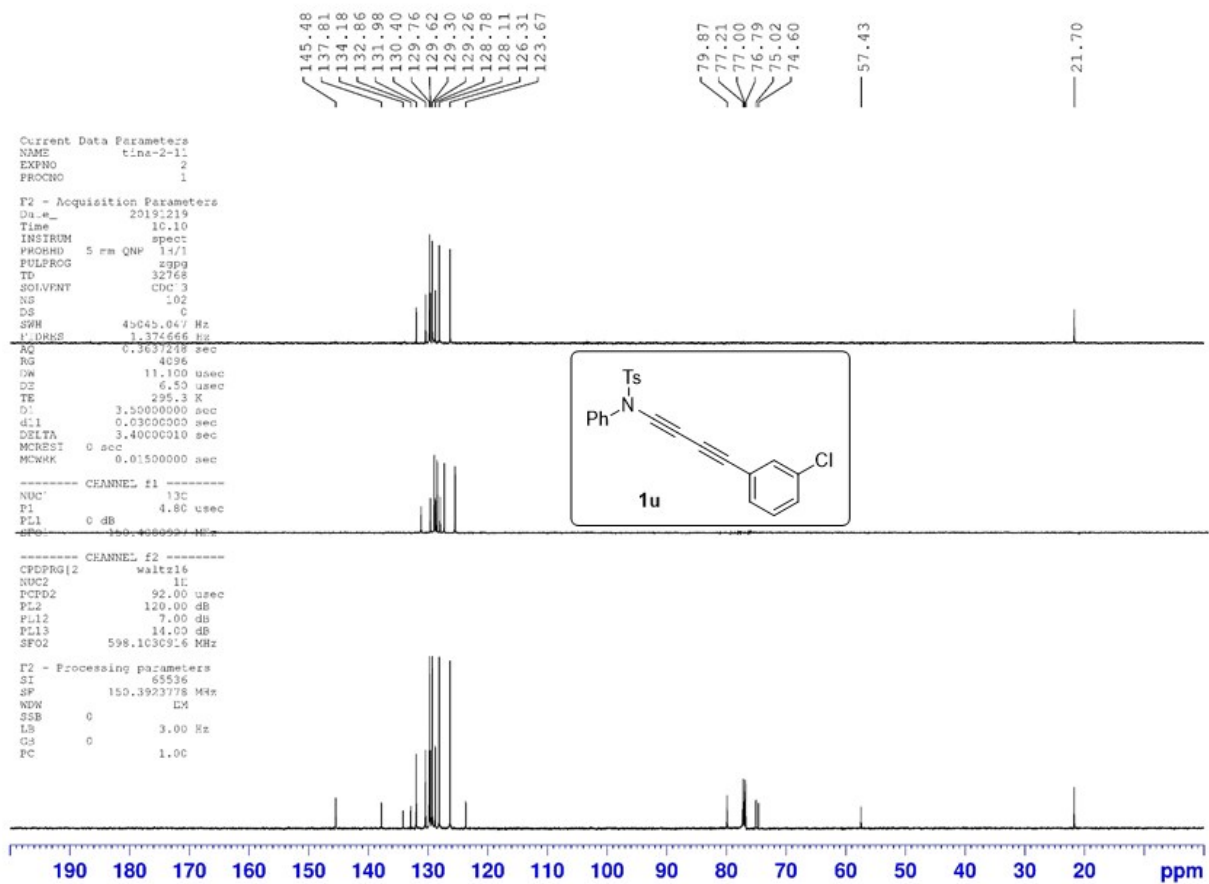

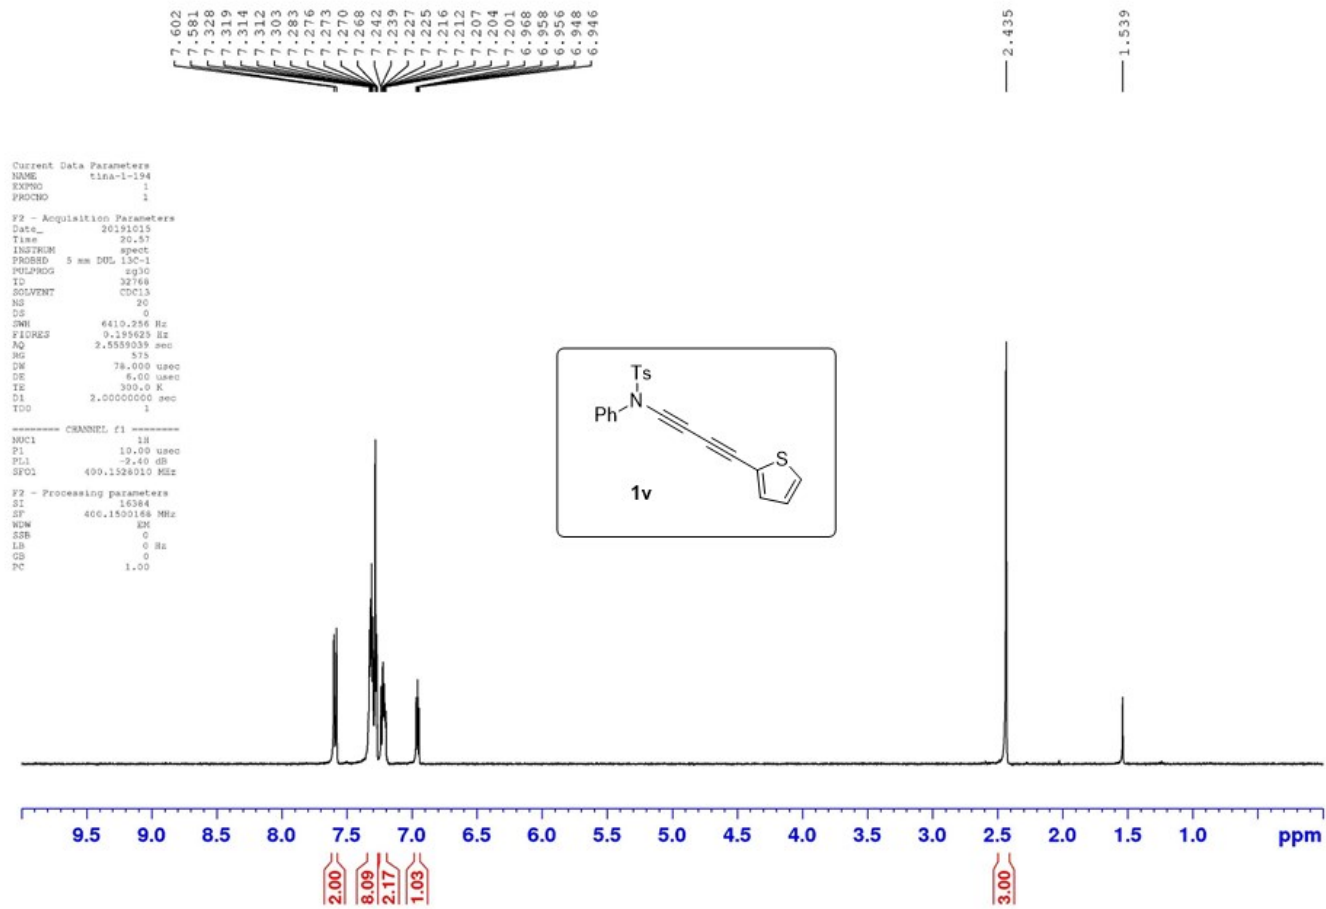

tina-1-194

Current Data Parameters  
NAME 20191015  
EXPNO 3  
PROCNO 1  
  
F2 - Acquisition Parameters  
Date\_ 20191015  
Time 22:12  
INSTRUM spect  
PROBHD 5 mm DUL 13C-1  
PULPROG zgpg30  
TD 65536  
SOLVENT CDCl3  
NS 200  
DS 0  
SWH 22727.273 Hz  
FIDRES 0.346791 Hz  
AQ 1.4619420 sec  
RG 2050  
DM 22.000 usec  
PC 1.00  
YC 300.0 K  
D1 2.00000000 sec  
d11 0.03000000 sec  
DELTA 1.89999998 sec  
TDO 1

----- CHANNEL f1 -----  
NUC1 13C  
P1 9.70 usec  
PL1 -0.50 dB  
SFO1 100.6288660 MHz  
  
----- CHANNEL f2 -----  
CPDPRG2 waltz16  
NUC2 1H  
PCPD2 90.00 usec  
PL2 0.00 dB  
PL12 15.10 dB  
PL13 18.10 dB  
SFO2 400.1516010 MHz

F2 - Processing parameters  
SI 32768  
SF 100.6178099 MHz  
WDW EM  
SSB 0  
LB 3.00 Hz  
GB 0  
PC 1.00

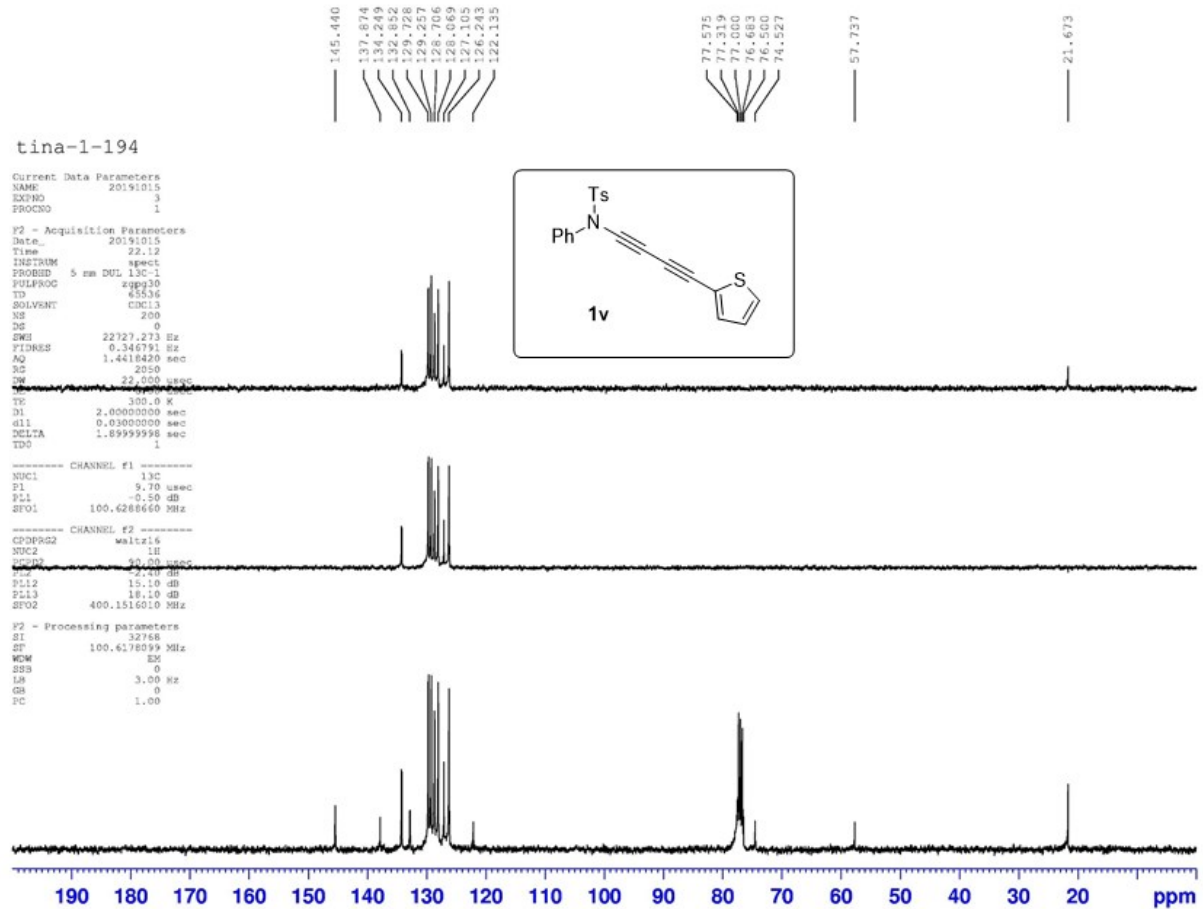

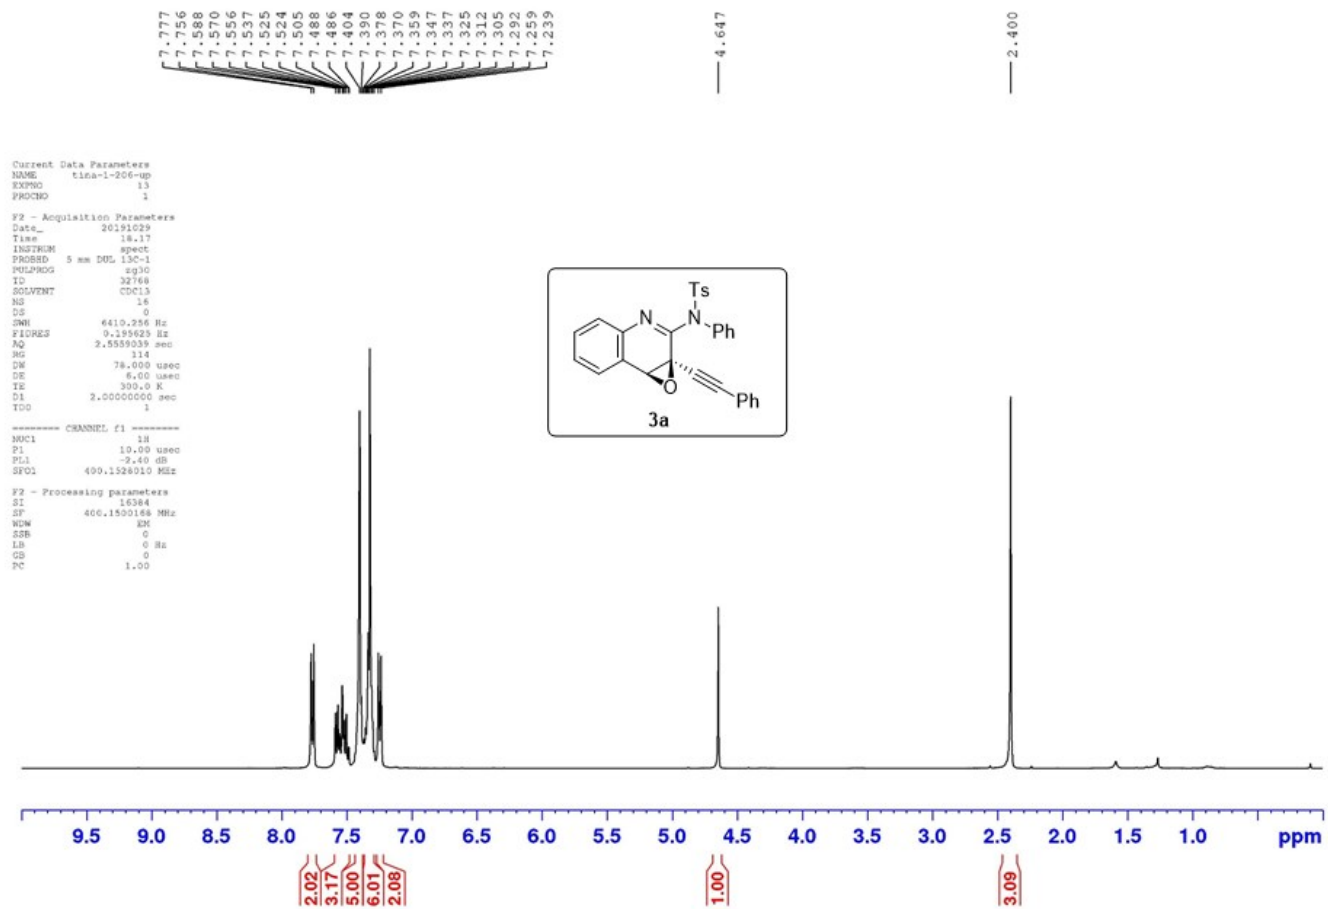



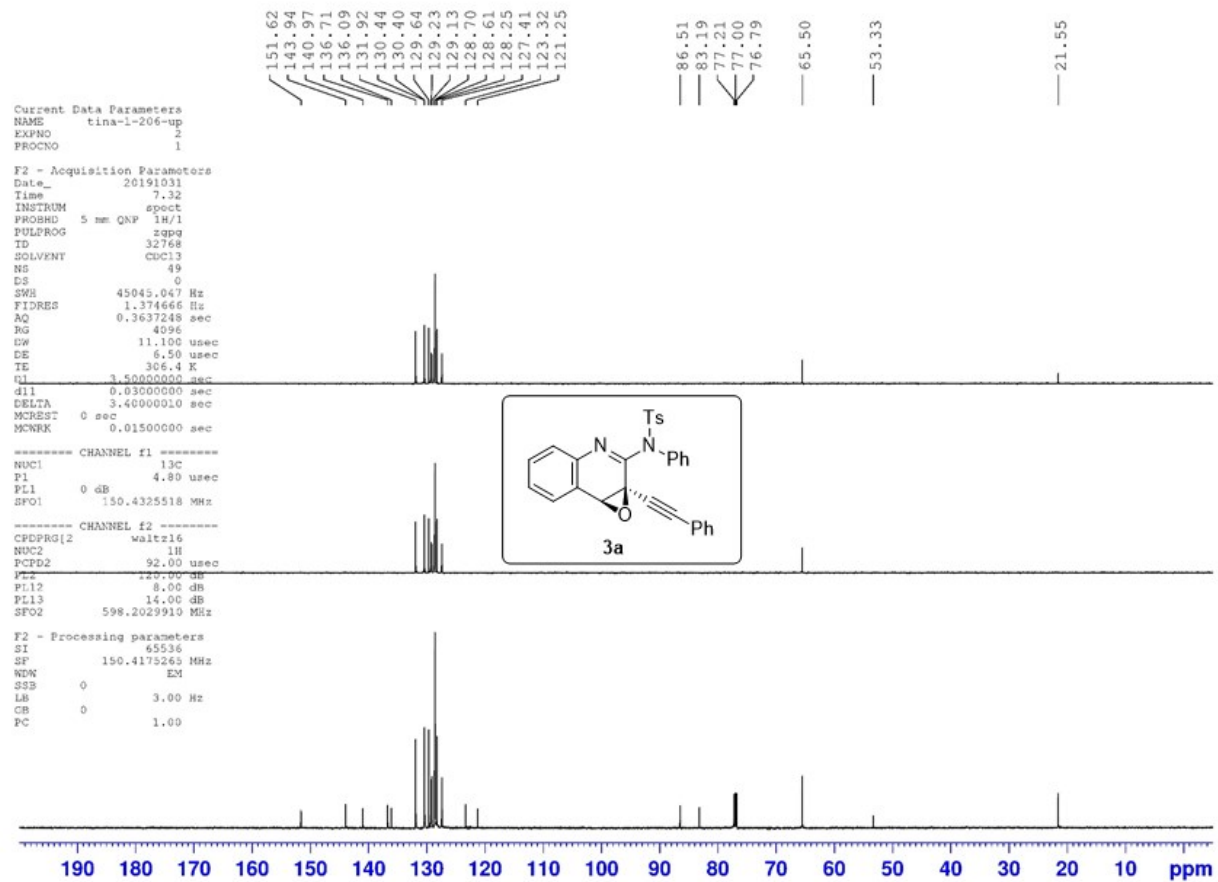

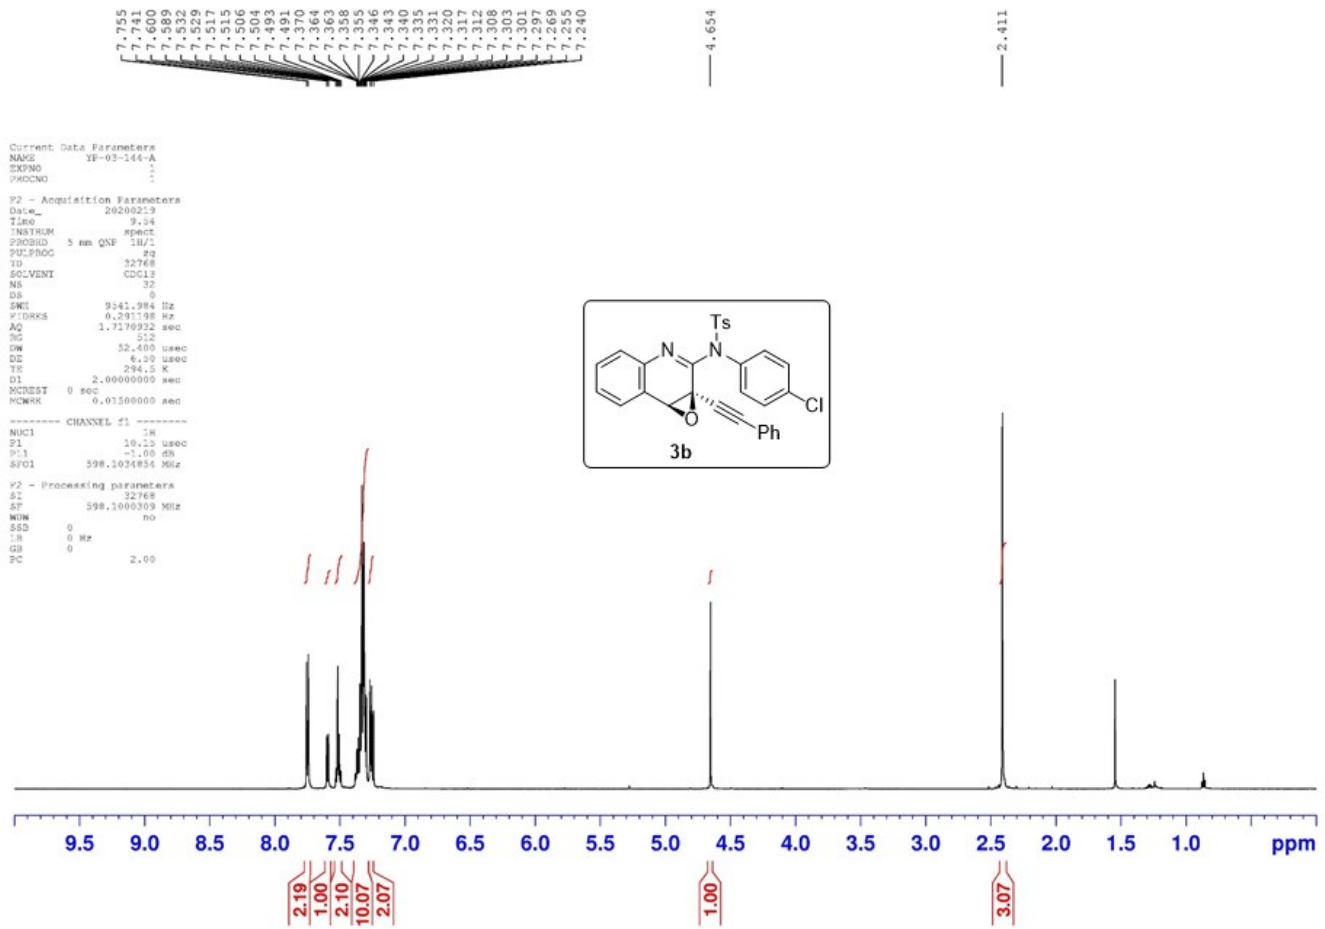

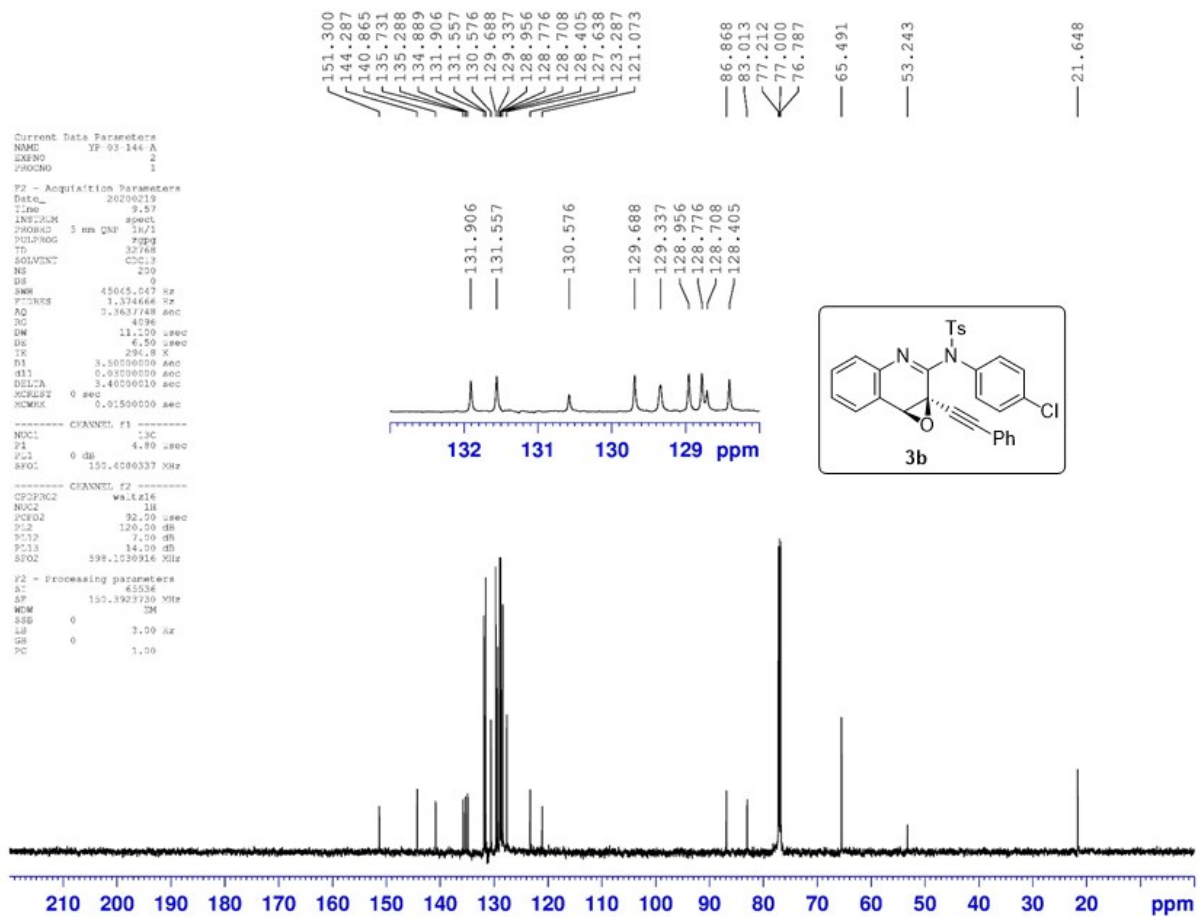

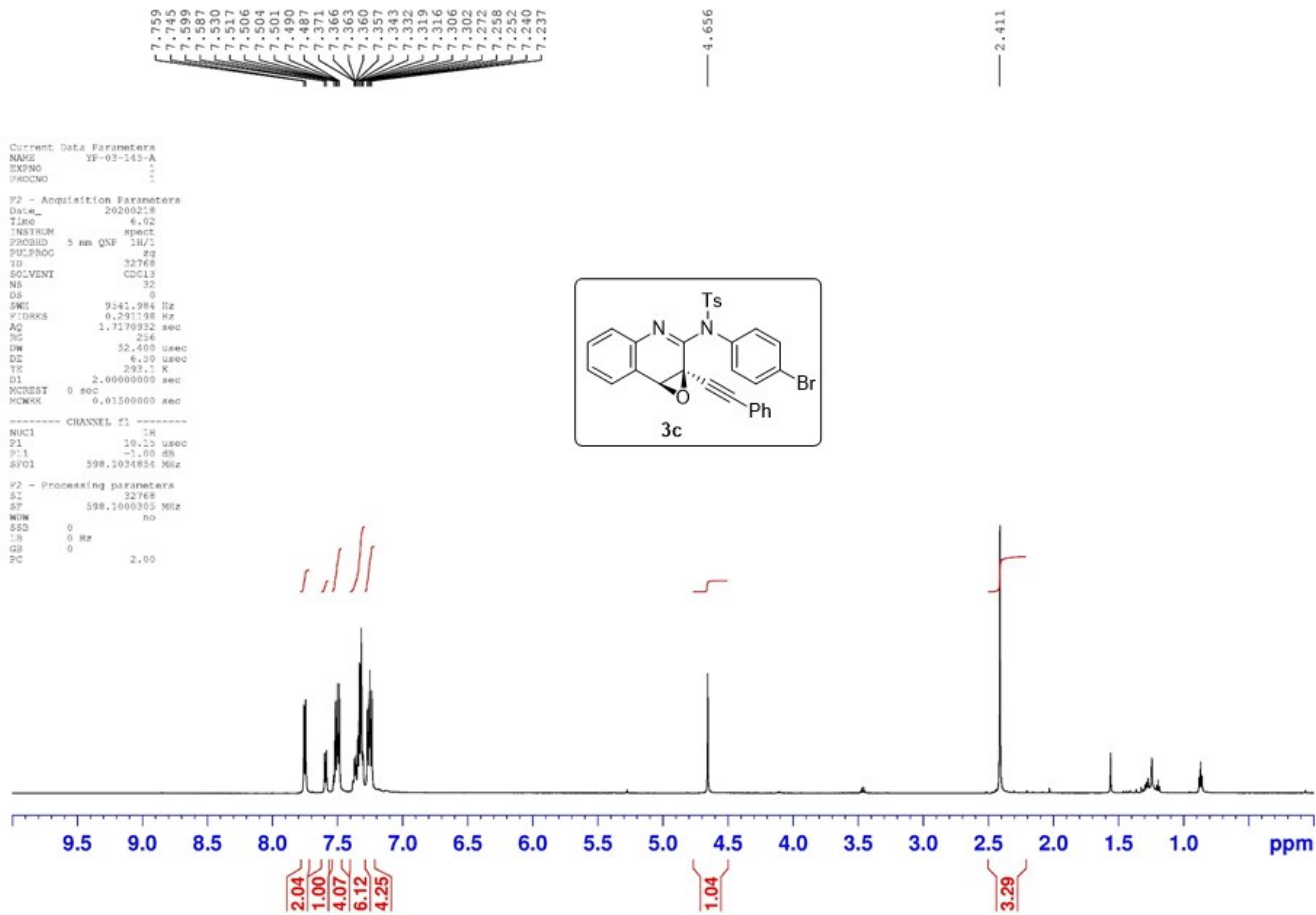

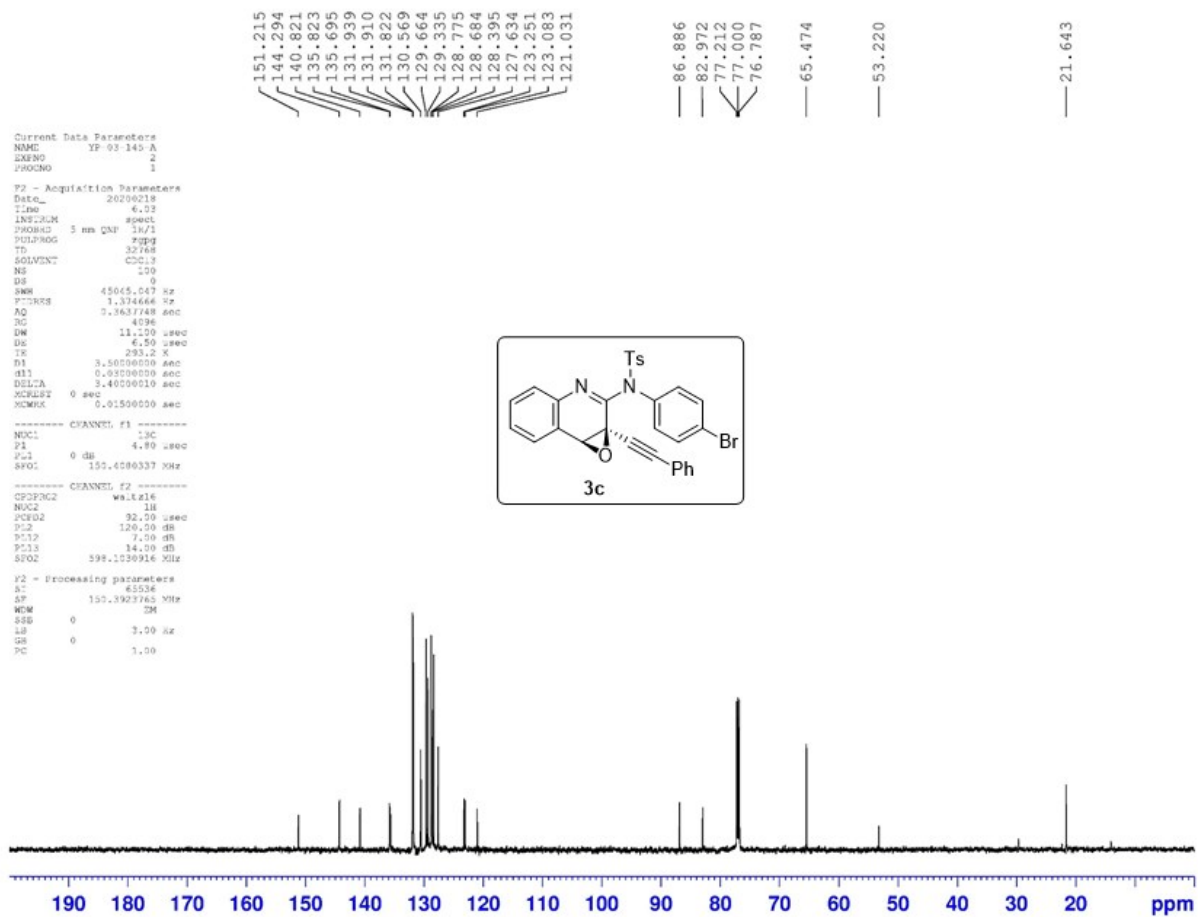

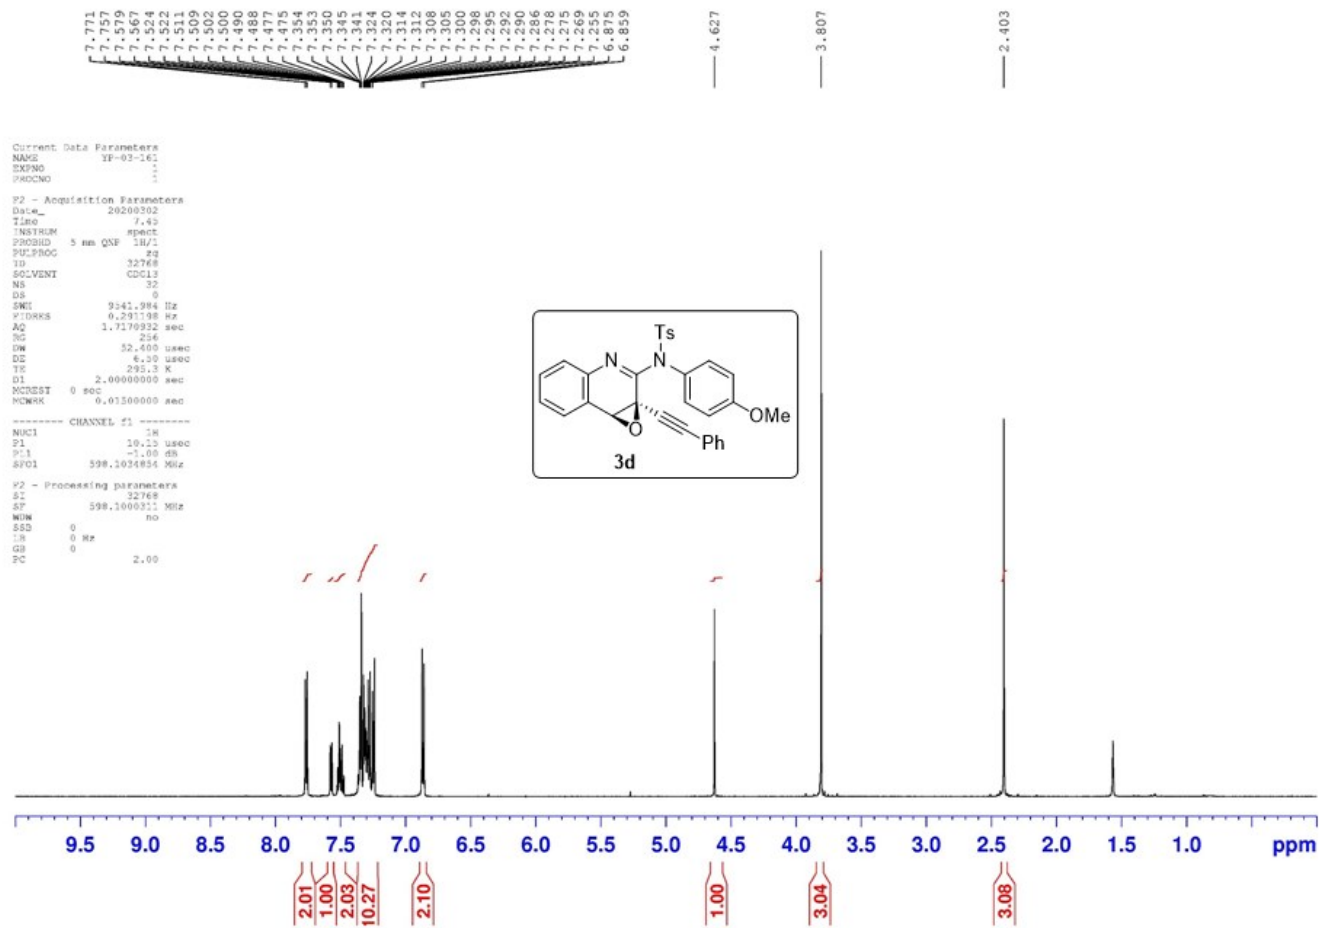

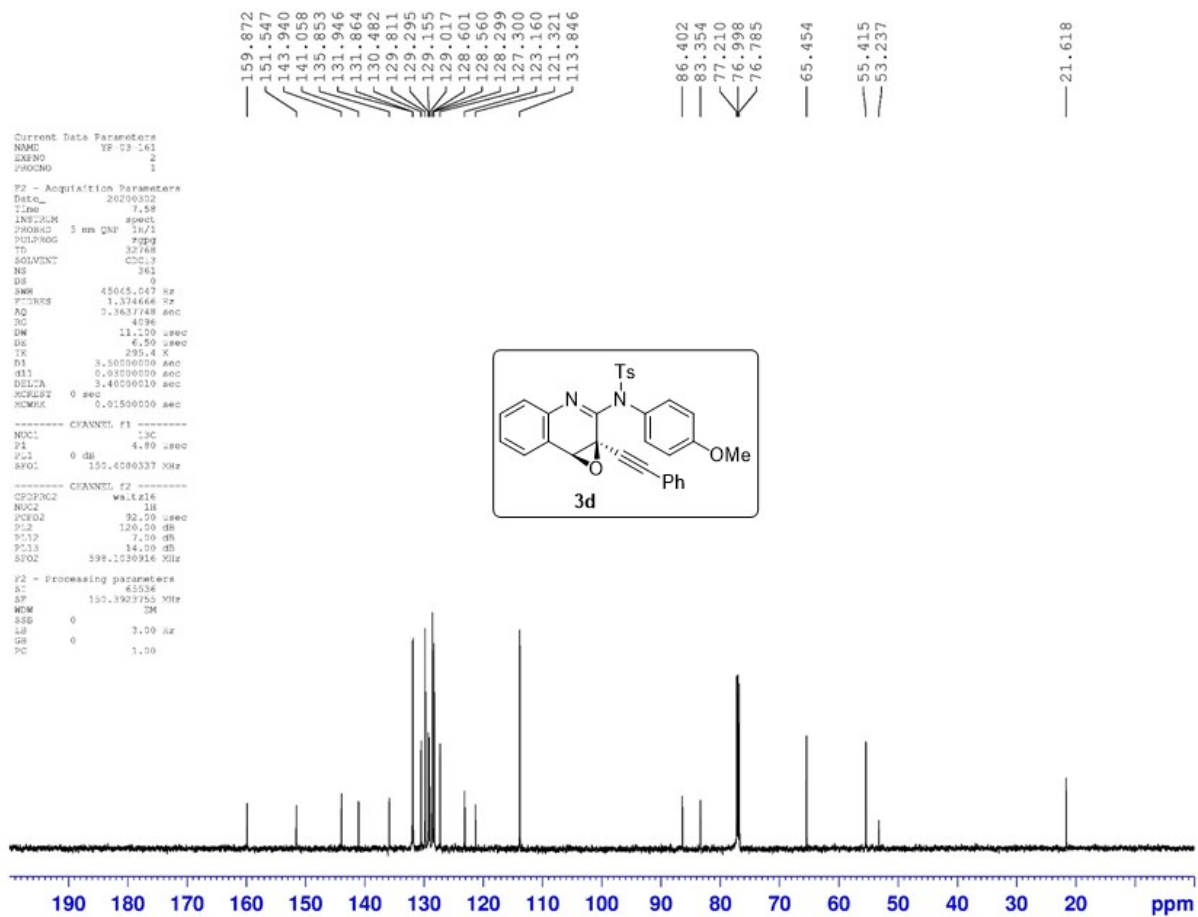

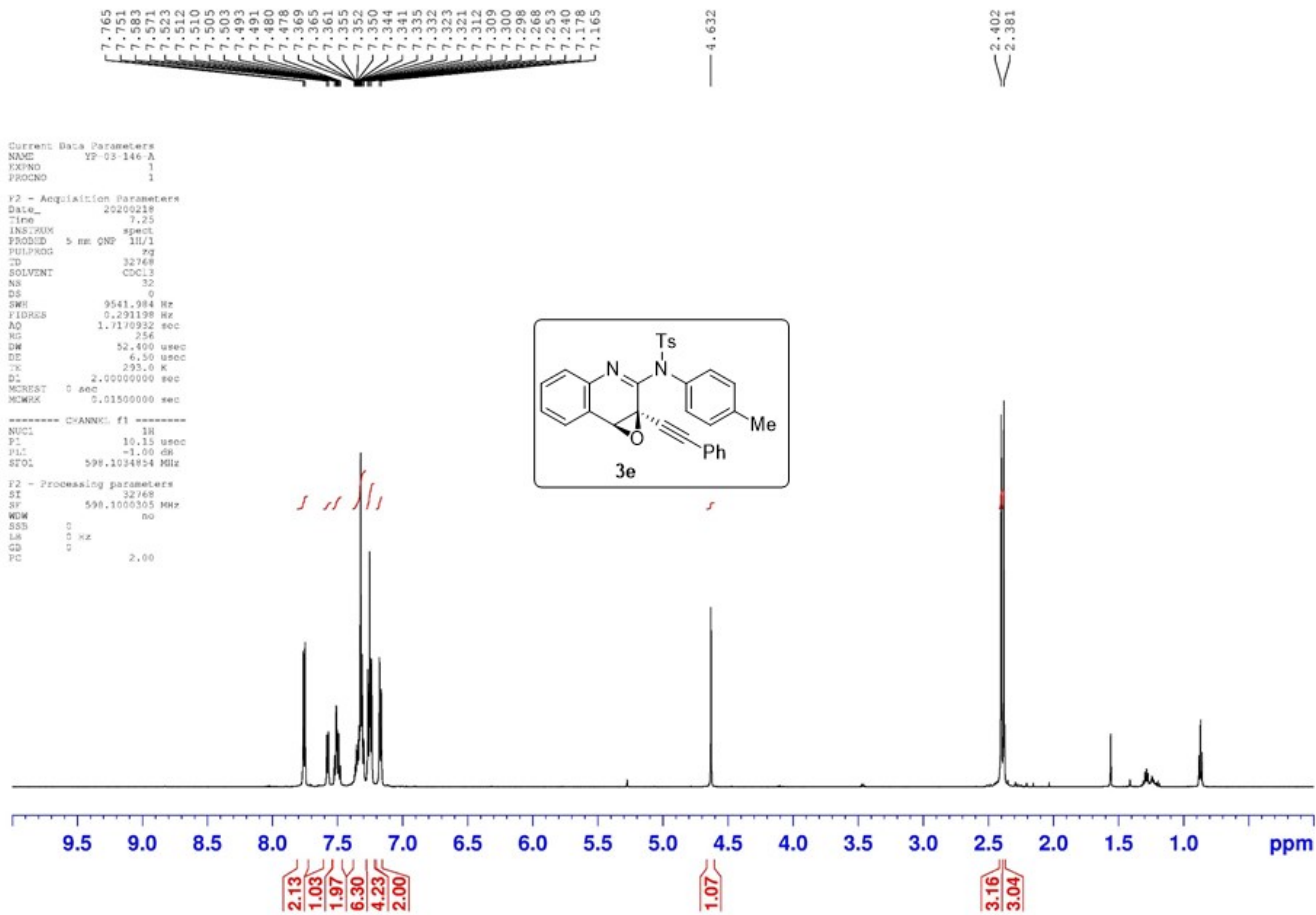



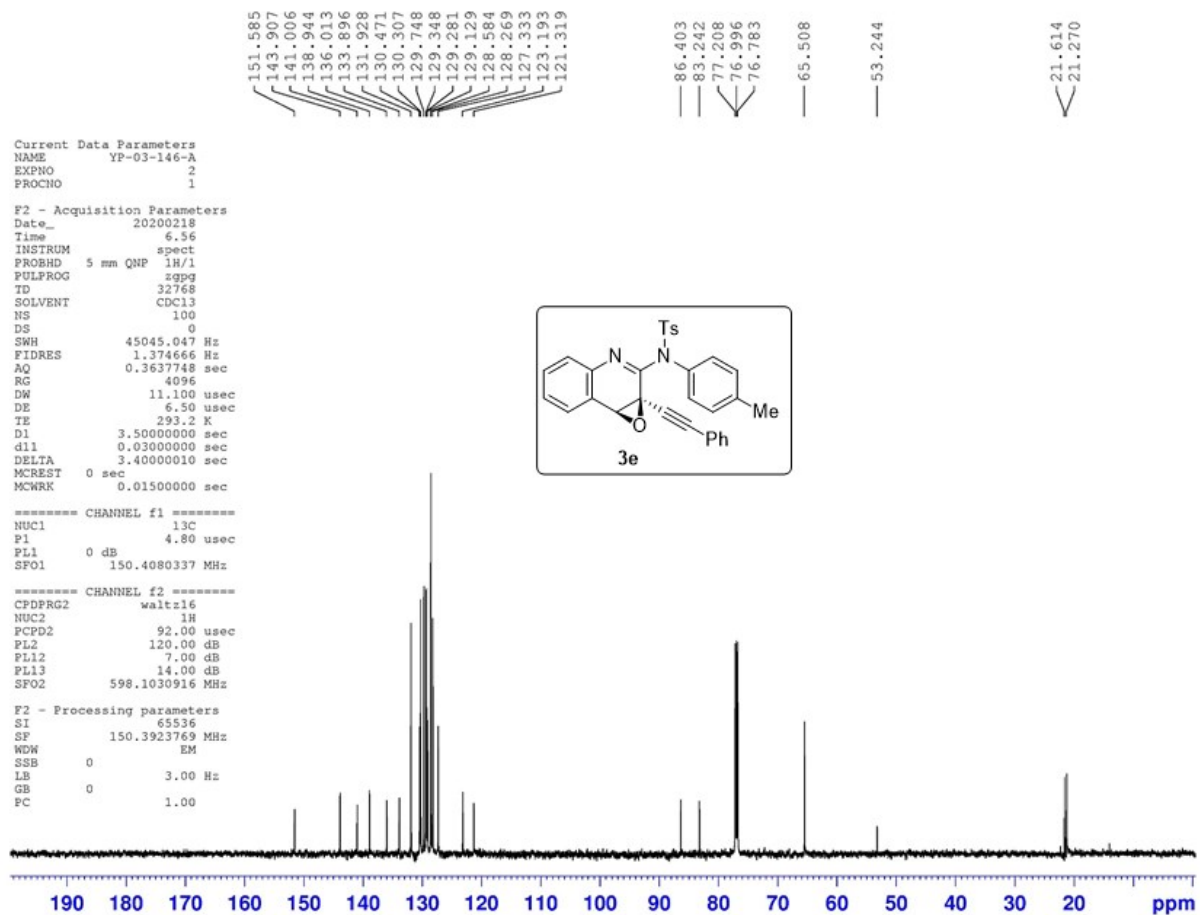

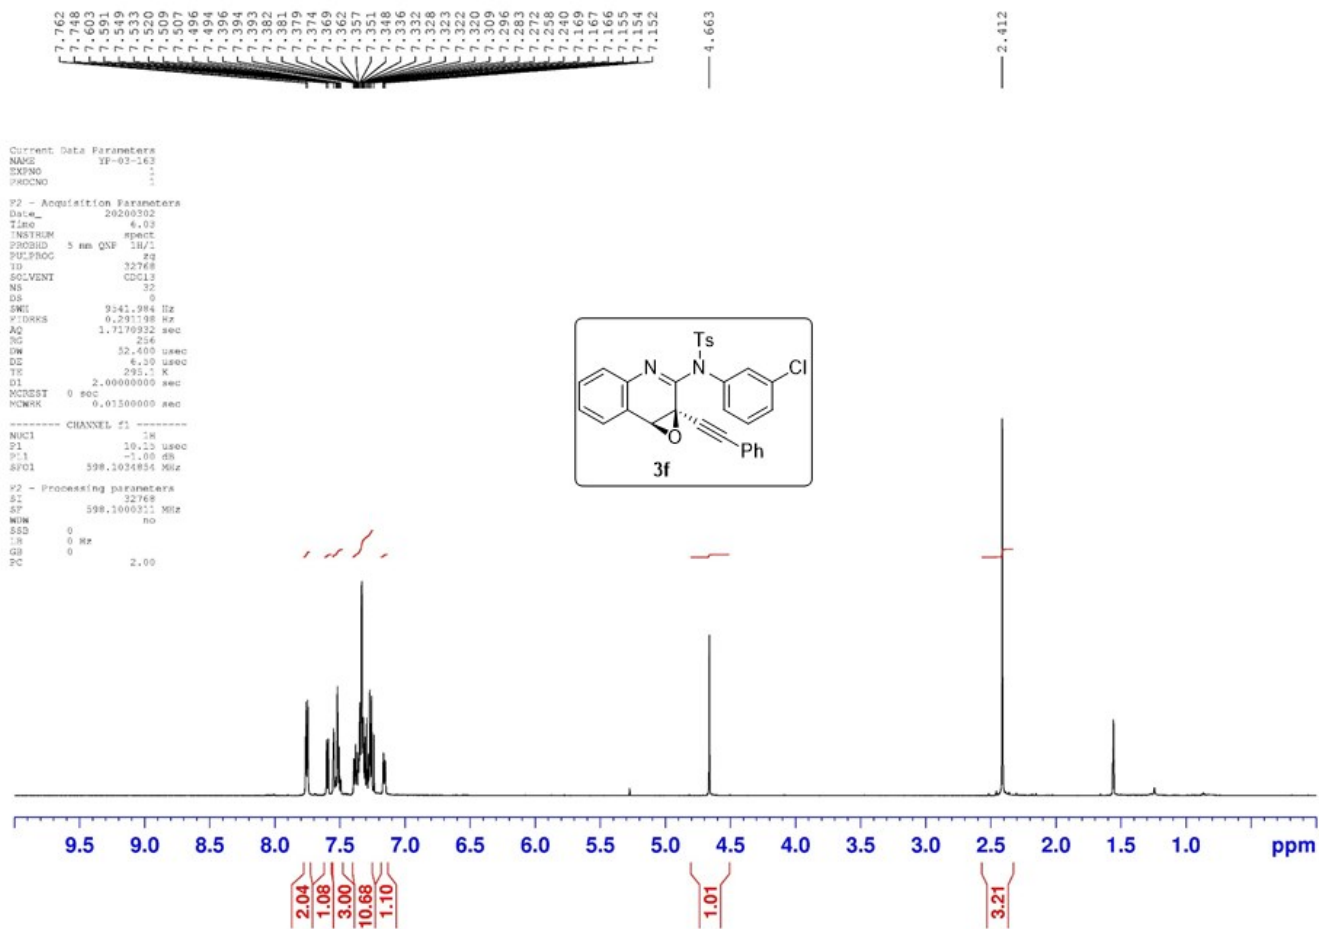

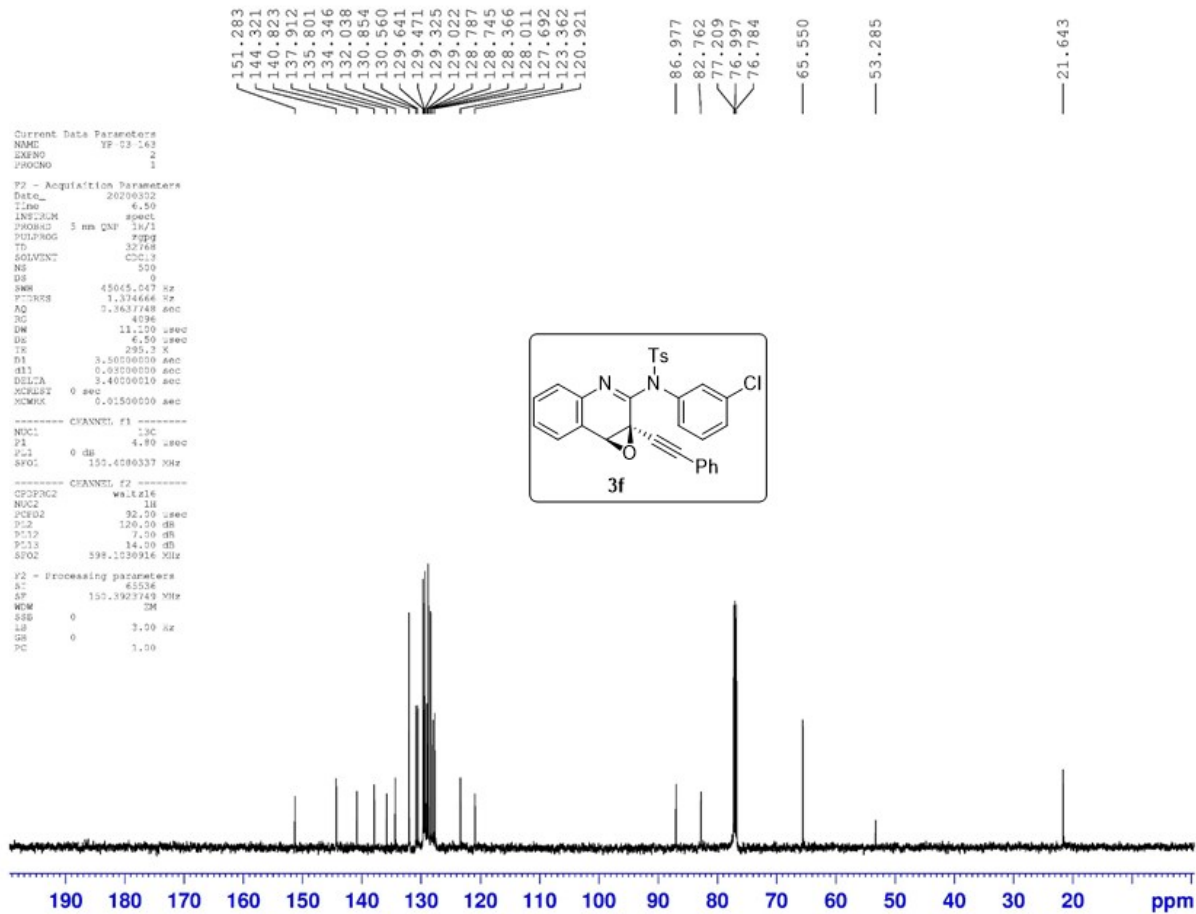

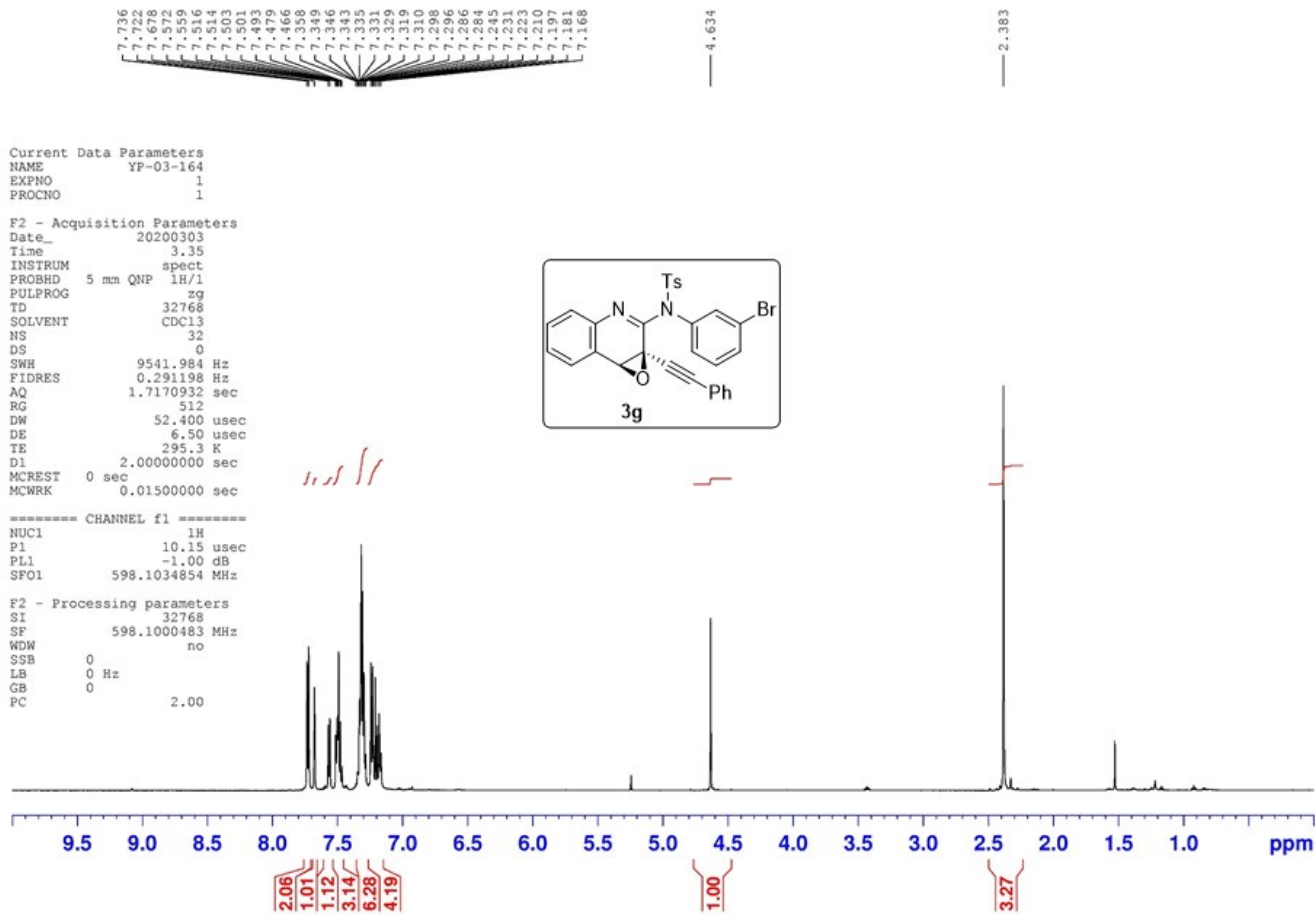

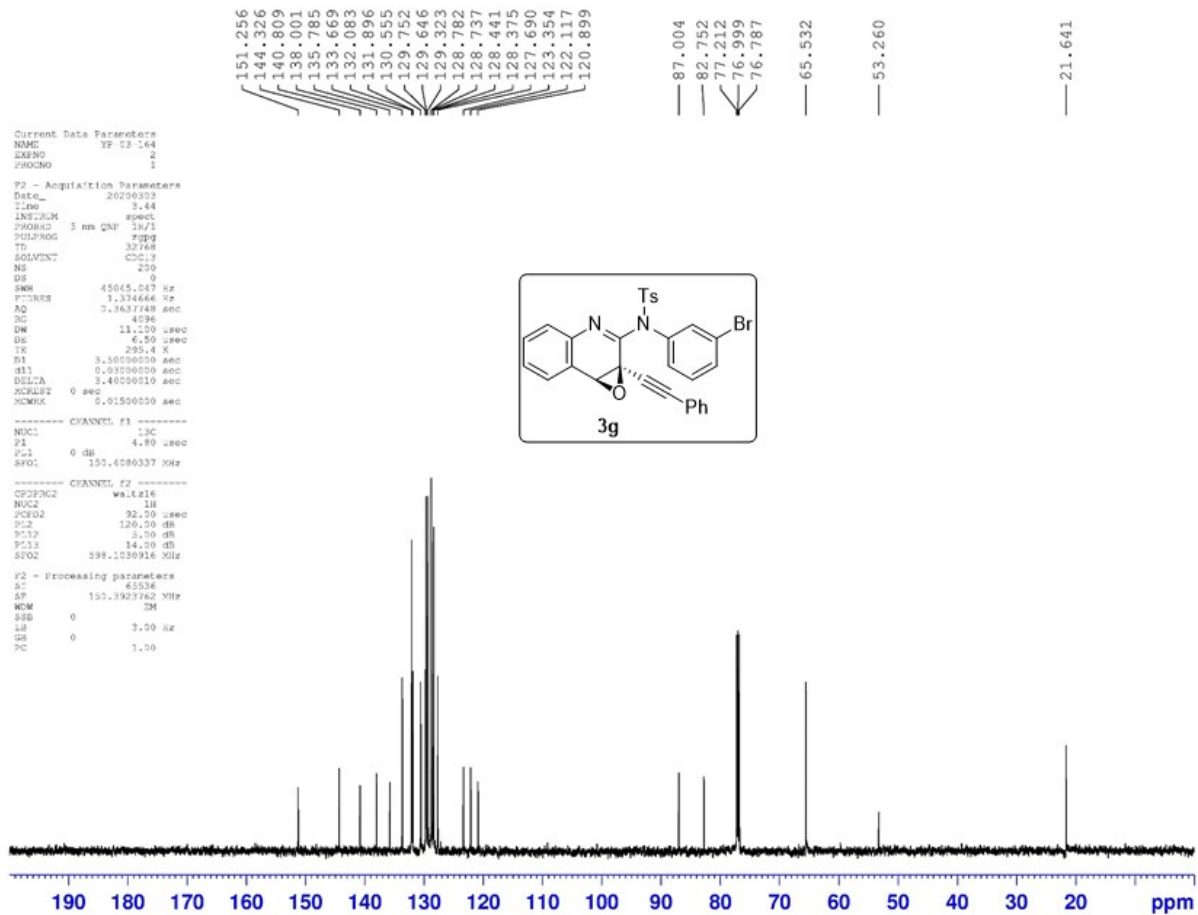

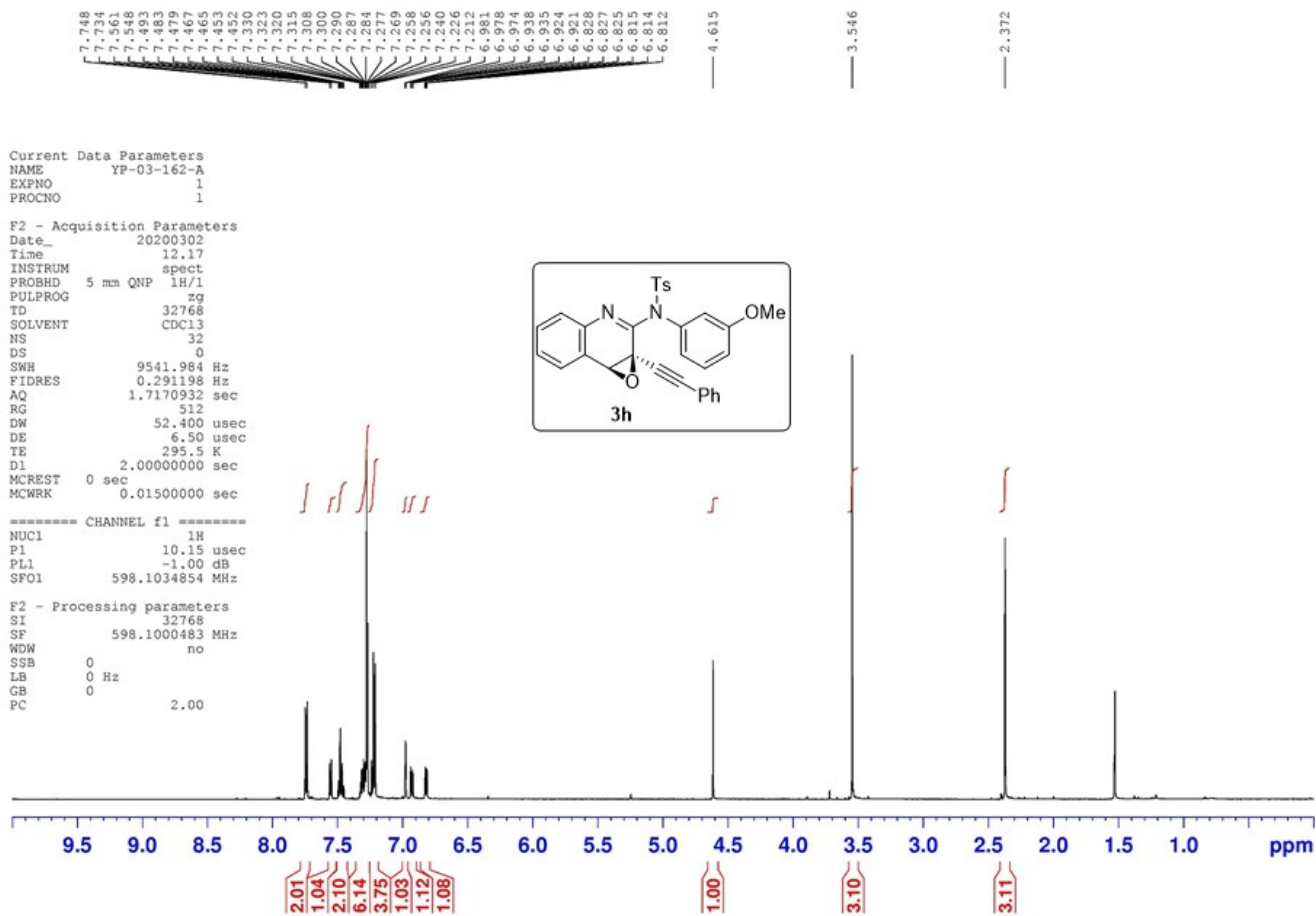

```

Current Data Parameters
NAME      YP-03-162-A
EXPNO     2
PROCNO    1

F2 - Acquisition Parameters
Date_     20200302
Time      11.41
INSTRUM   spect
PROBHD    5 mm QNP 1H/1
PULPROG   zgpg30
TD         32768
SOLVENT   CDCl3
NS         137
DS         0
SWH        45045.047 Hz
F2-RES    1.374668 Hz
AQ         0.3637748 sec
RG         4096
SWH        11.200 usec
DS         6.50 usec
TK         295.4 K
D1         3.50500000 sec
d11        0.03500000 sec
DELTA     3.40500010 sec
XCPDPRG2  0 sec
XCMRXC    0.01500000 sec

----- CHANNEL F1 -----
NUC1       13C
P1         1.30
PL1        0 dB
SFO1       101.628337 MHz

----- CHANNEL F2 -----
CPDPRG2    waltz16
NUC2        1H
PCPD2       32.00 usec
PC2         120.00 dB
PC12        5.00 dB
PC13        14.00 dB
SFO2        500.1360916 MHz

F2 - Processing parameters
AC          45536
SF          101.628337 MHz
WDW         EM
SSB         0
LB          3.00 Hz
GB          0
PC          1.00

```

159.709  
 151.633  
 144.008  
 140.996  
 137.789  
 136.131  
 132.027  
 130.487  
 129.667  
 129.259  
 129.180  
 129.048  
 128.642  
 128.291  
 127.420  
 123.323  
 122.216  
 121.256  
 115.689  
 115.553  
  
 86.549  
 83.111  
 77.212  
 77.000  
 76.788  
  
 65.696  
  
 55.211  
 53.386  
  
 21.632

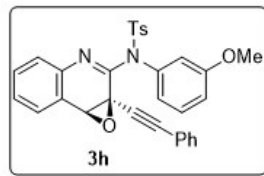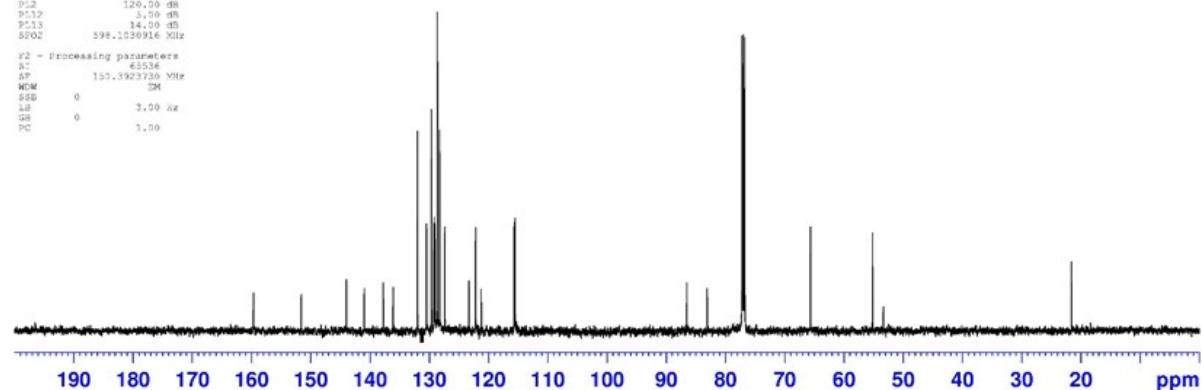

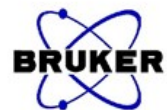

tina-2-42

Current Data Parameters  
NAME 20200203  
EXPNO 5  
PROCNO 1

F2 - Acquisition Parameters  
Date\_ 20200203  
Time 22.20  
INSTRUM spect  
PROBHD 5 mm DUL 13C-1  
PULPROG zg30  
TD 32768  
SOLVENT CDCl3  
NS 70  
DS 0  
SWH 6410.256 Hz  
FIDRES 0.195625 Hz  
AQ 2.5559540 sec  
RG 267  
DM 78.000 usec  
DE 6.00 usec  
TE 300.0 K  
D1 2.00000000 sec  
TDO 1

----- CHANNEL f1 -----  
NUC1 1H  
P1 10.00 usec  
PL1 -2.40 dB  
SFO1 400.1528010 MHz

F2 - Processing parameters  
SI 16384  
SF 400.1500171 MHz  
WOW EM  
SSB 0  
LB 0.00 Hz  
GB 0  
PC 1.00

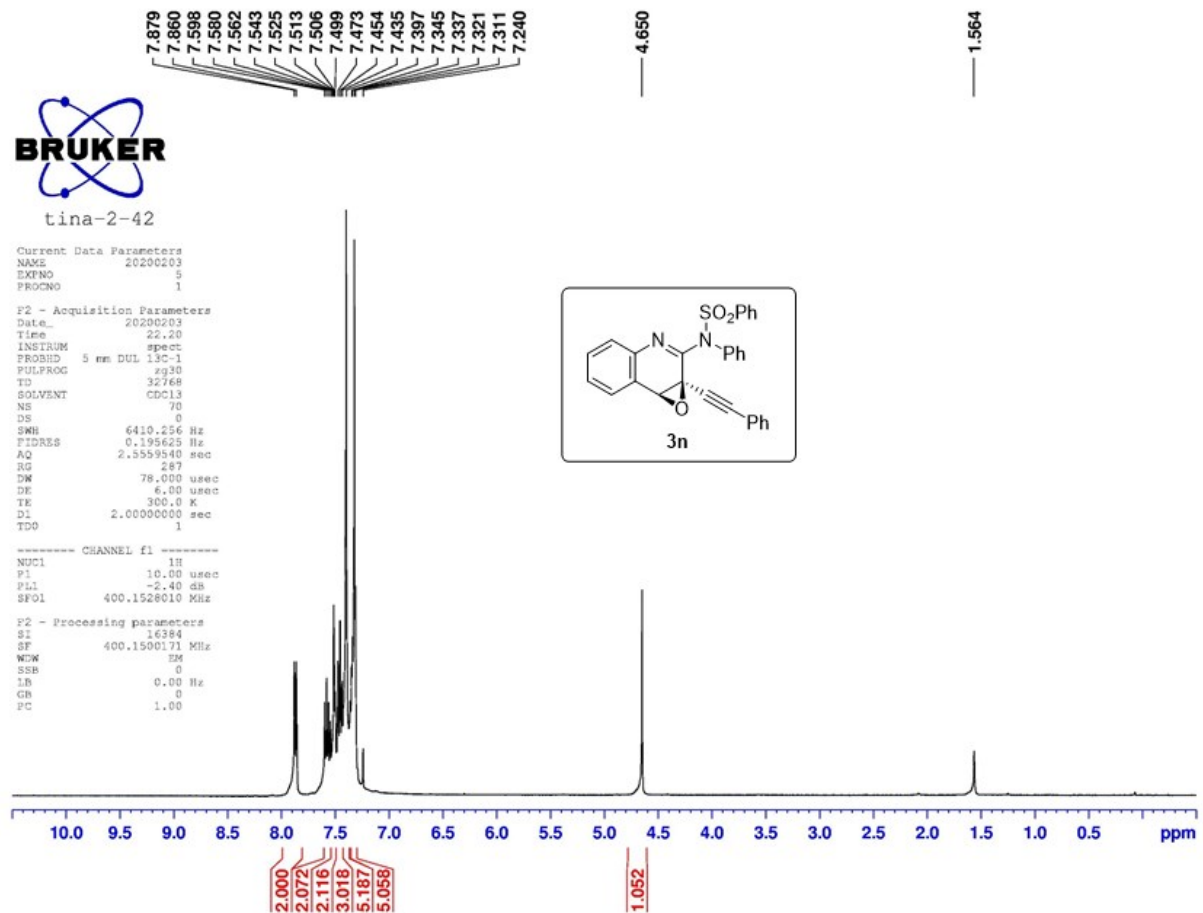



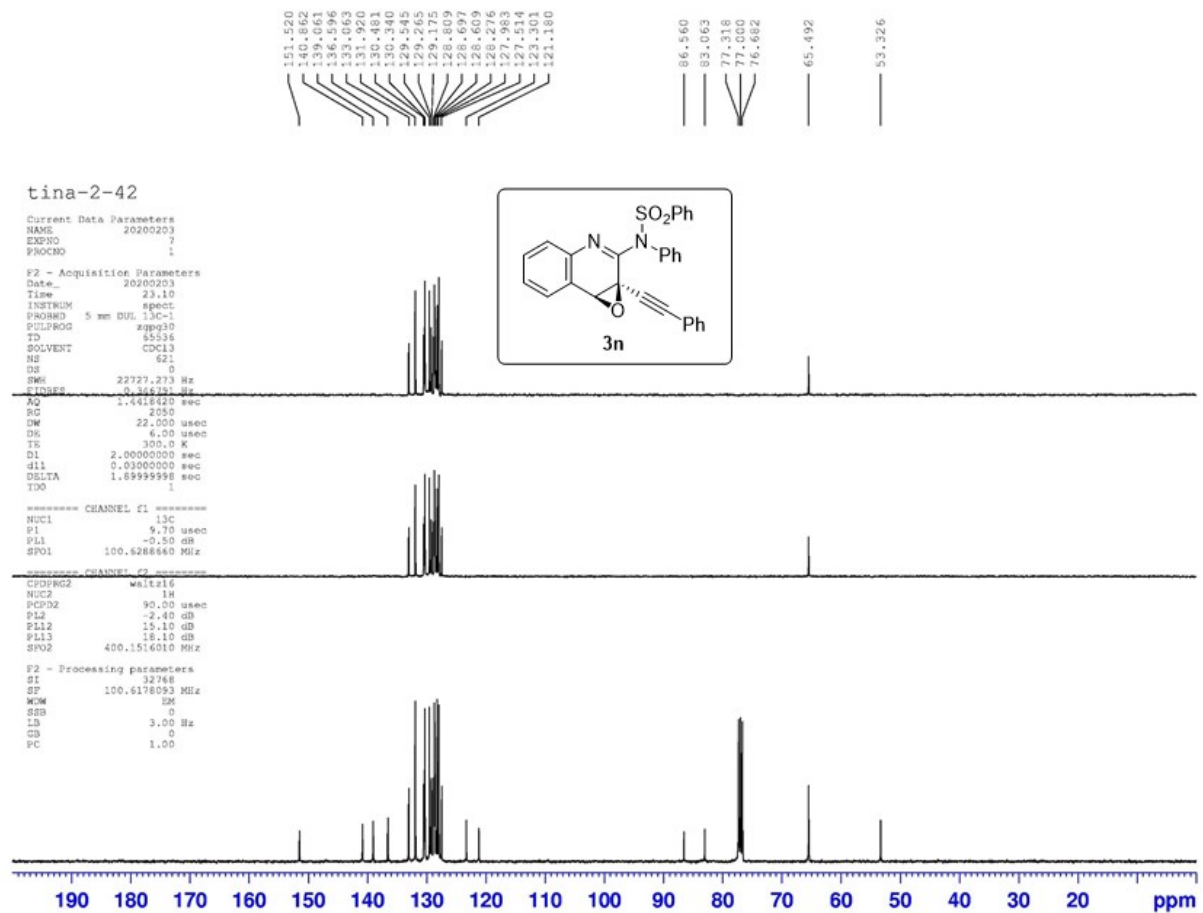

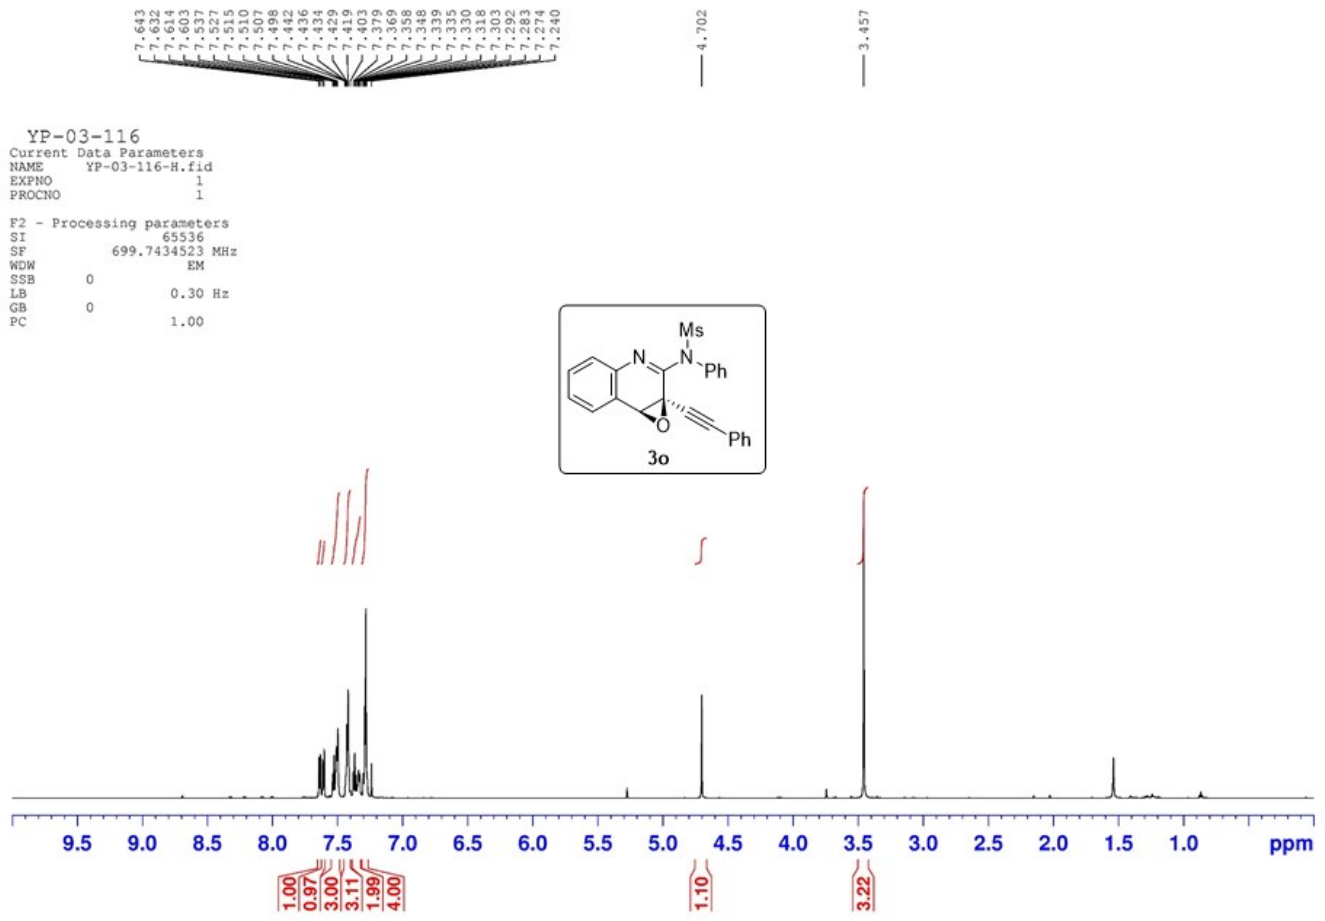

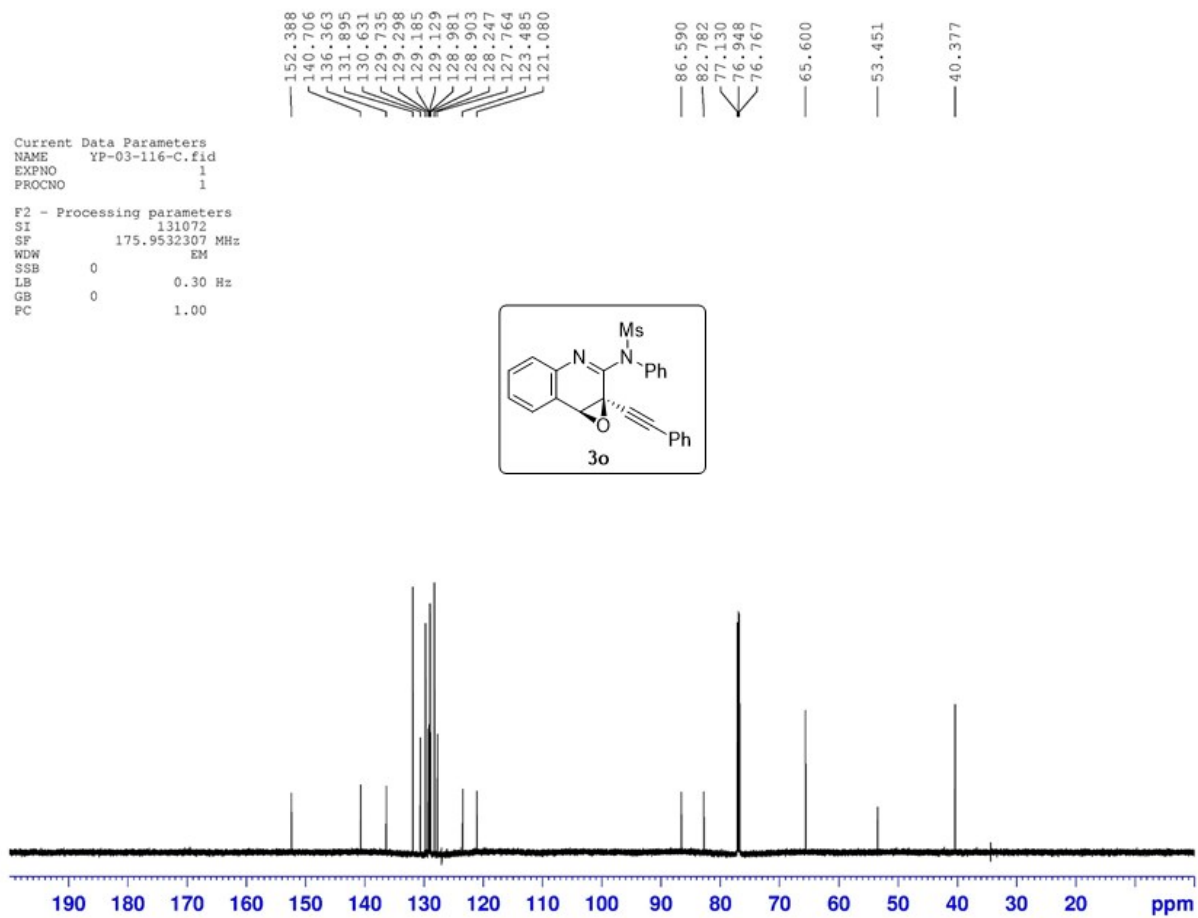

7.742  
7.722  
7.593  
7.574  
7.534  
7.519  
7.516  
7.503  
7.500  
7.483  
7.481  
7.403  
7.392  
7.384  
7.371  
7.360  
7.343  
7.338  
7.325  
7.322  
7.300  
7.279  
7.253  
7.240  
7.234  
7.218

4.638

2.402

1.549

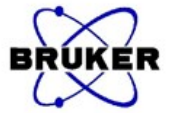

tina-1-235

```

Current Data Parameters
NAME      20191128
EXPNO     6
PROCNO    1

F2 - Acquisition Parameters
Date_     20191128
Time      22.00
INSTRUM   spect
PROBHD    5 mm DUL 13C-1
PULPROG   zg30
TD         32768
SOLVENT   CDCl3
NS         20
DS         0
SWH        6410.256 Hz
FIDRES     0.195625 Hz
AQ         2.5559540 sec
RG         456
SW         78.000 usec
DE         6.00 usec
TE         300.0 K
D1         2.00000000 sec
TD0        1

===== CHANNEL f1 =====
NUC1       1H
P1         10.00 usec
PL1        -2.40 dB
SFO1       400.1528010 MHz

F2 - Processing parameters
SI         16384
SF         400.1500171 MHz
WDW        EM
SSB        0
LB         0.00 Hz
GB         0
PC         1.00
  
```

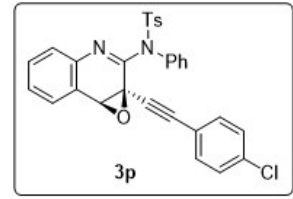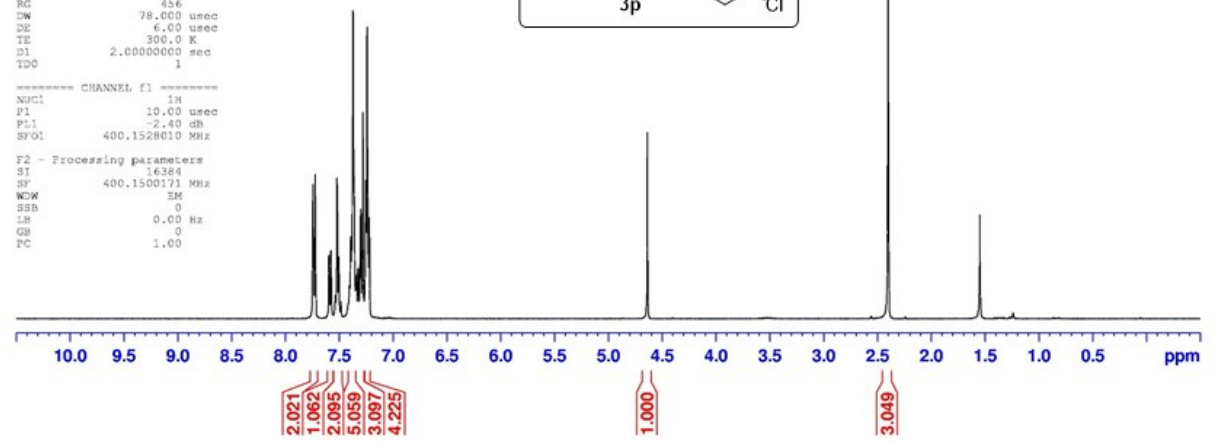

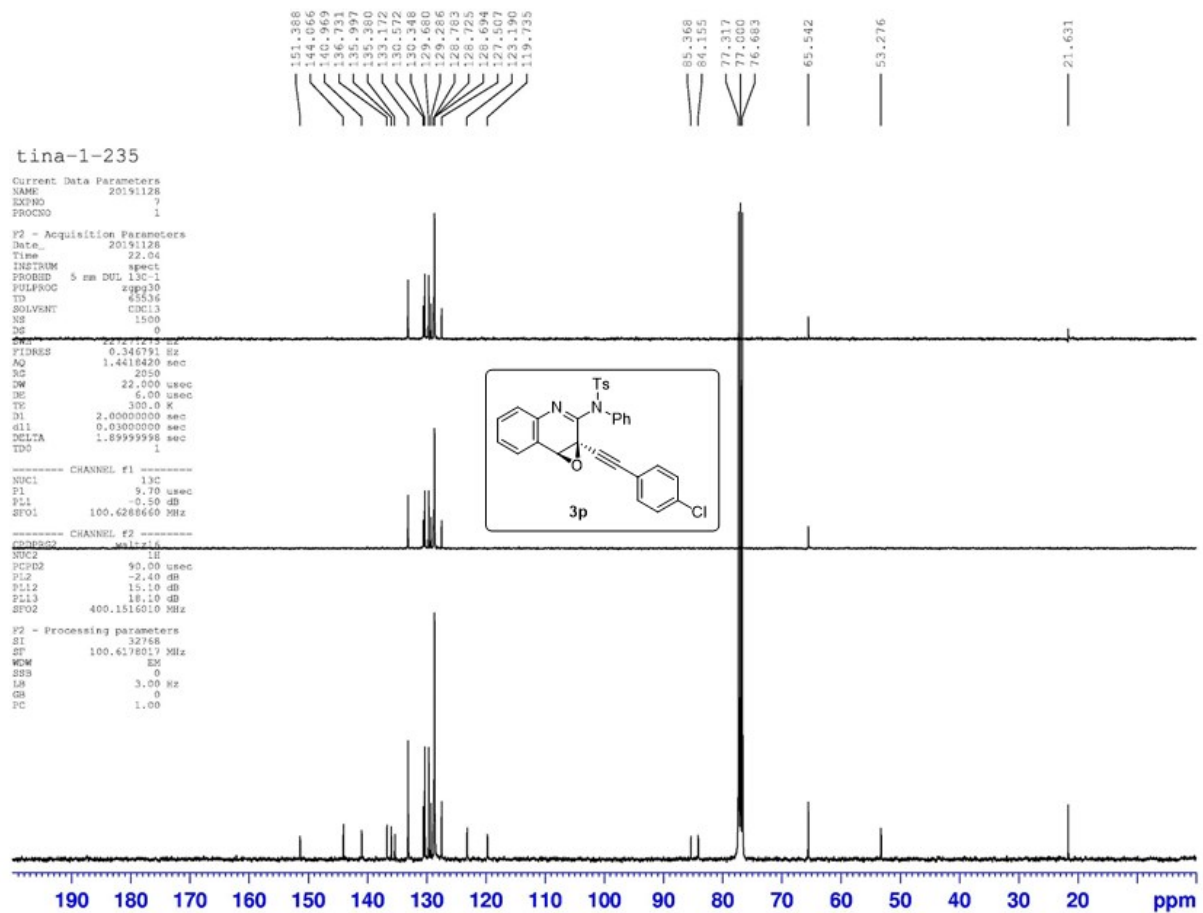

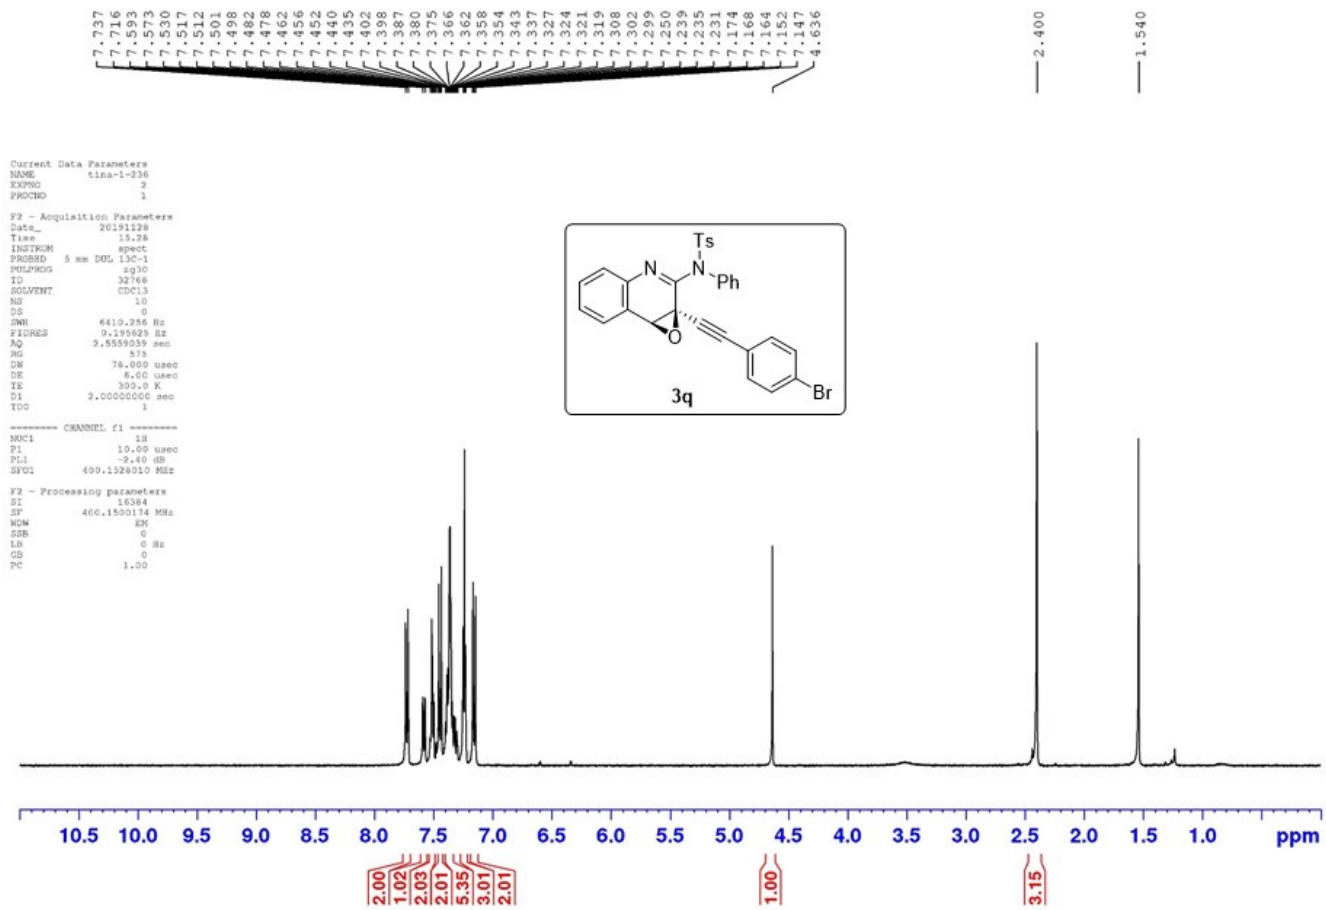

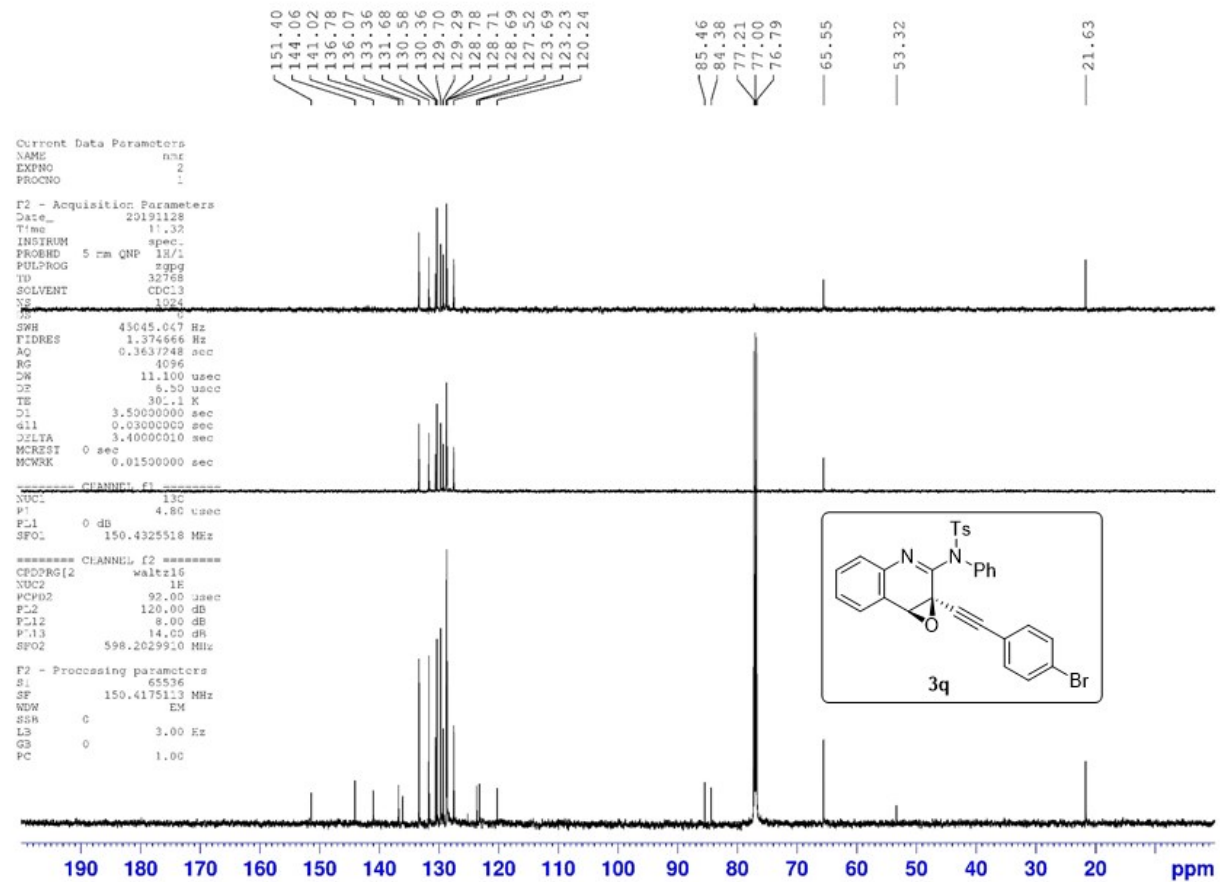

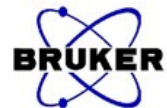

tina-2-18

```
Current Data Parameters
NAME      20191226
EXPNO     6
PROCNO    1

F2 - Acquisition Parameters
Date_     20191226
Time      22.24
INSTRUM   spect
PROBHD    5 mm DUL 13C-1
PULPROG   zg30
TD        32768
SOLVENT   CDCl3
NS         22
DS         0
SWH        6410.256 Hz
FIDRES     0.195625 Hz
AQ         2.5559540 sec
RG         724
DM         78.000 usec
DE         6.00 usec
TE         300.0 K
D1         2.00000000 sec
TDO        1

----- CHANNEL f1 -----
NUC1      1H
P1        10.00 usec
PL1       -2.40 dB
SFO1      400.1528010 MHz

F2 - Processing parameters
SI        16384
SF        400.1500172 MHz
WDW       EM
SSB       0
LB        0.00 Hz
GB        0
PC        1.00
```

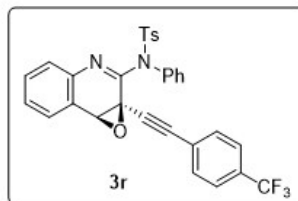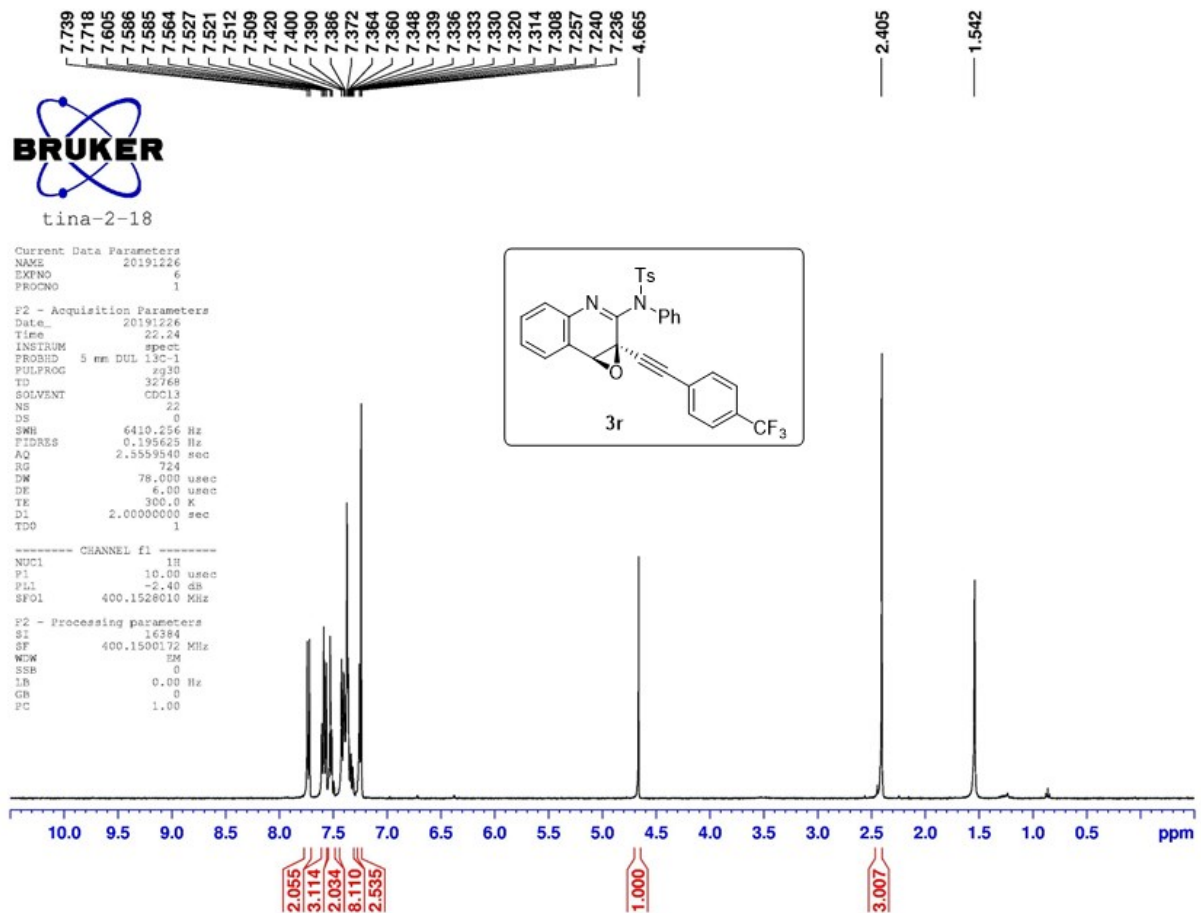



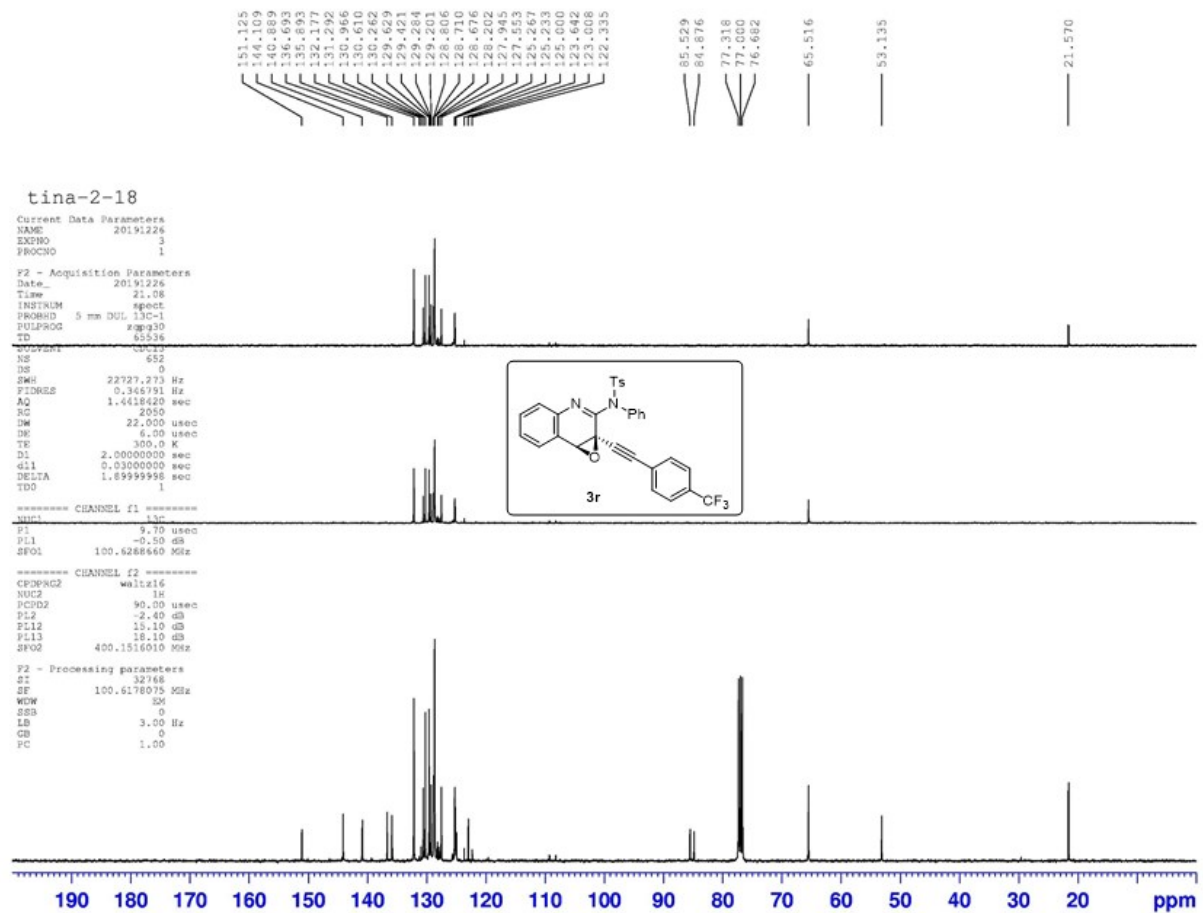

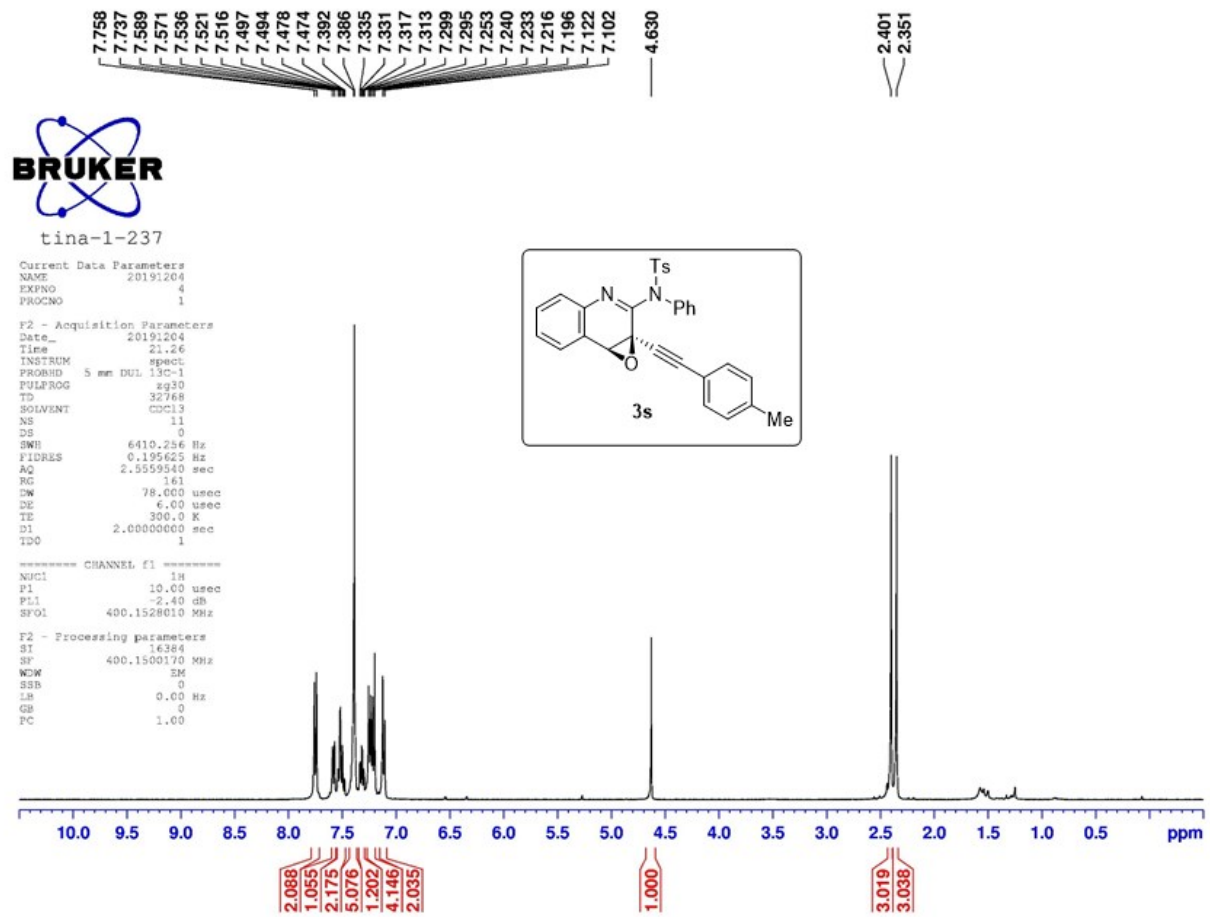

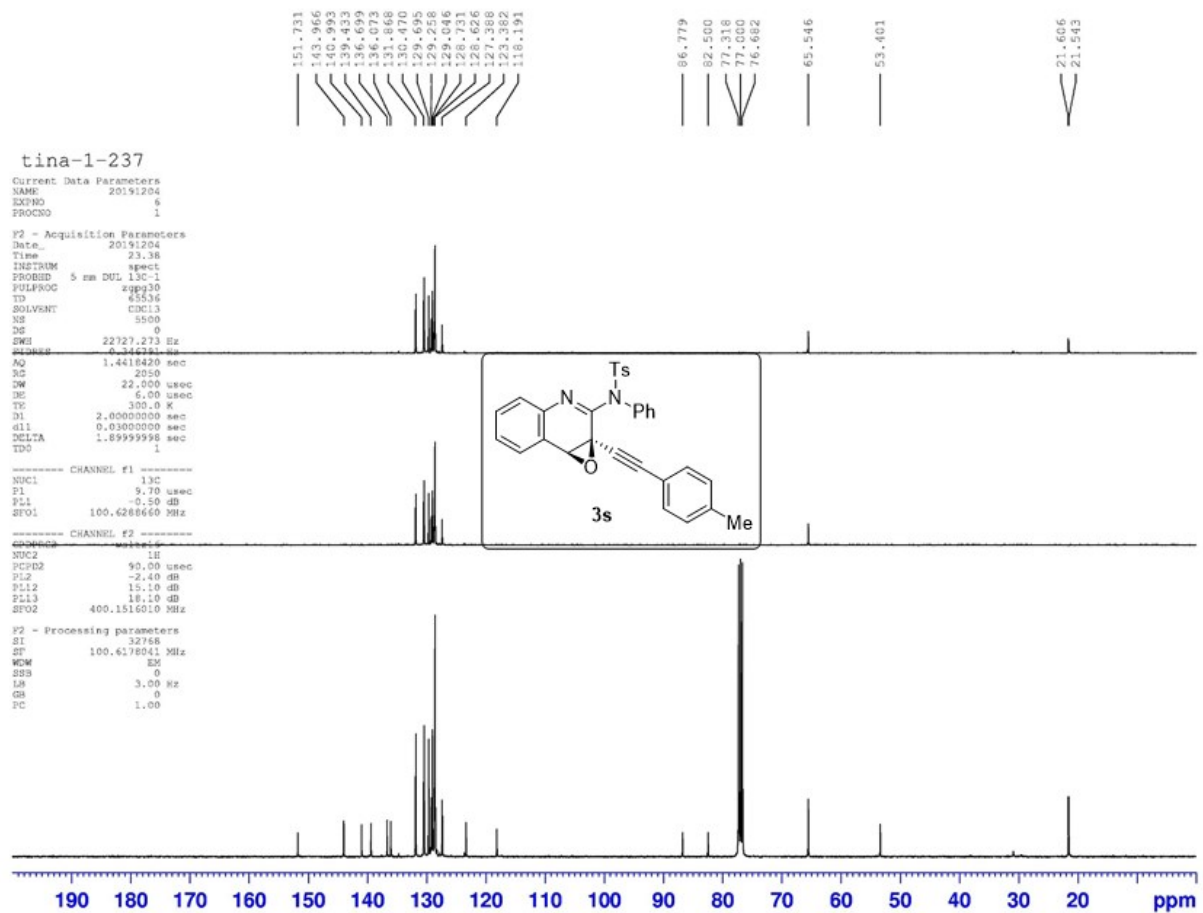

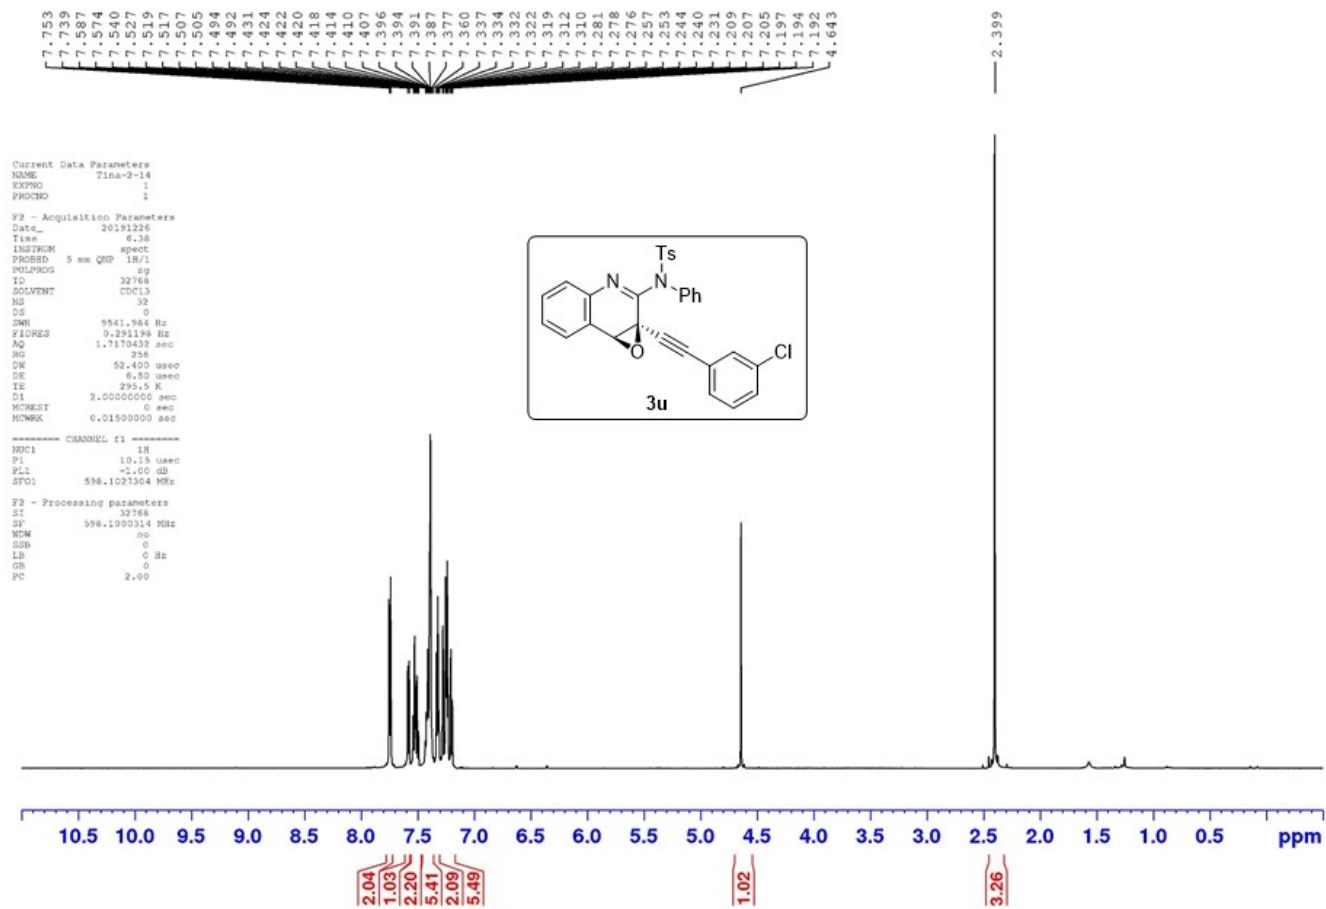

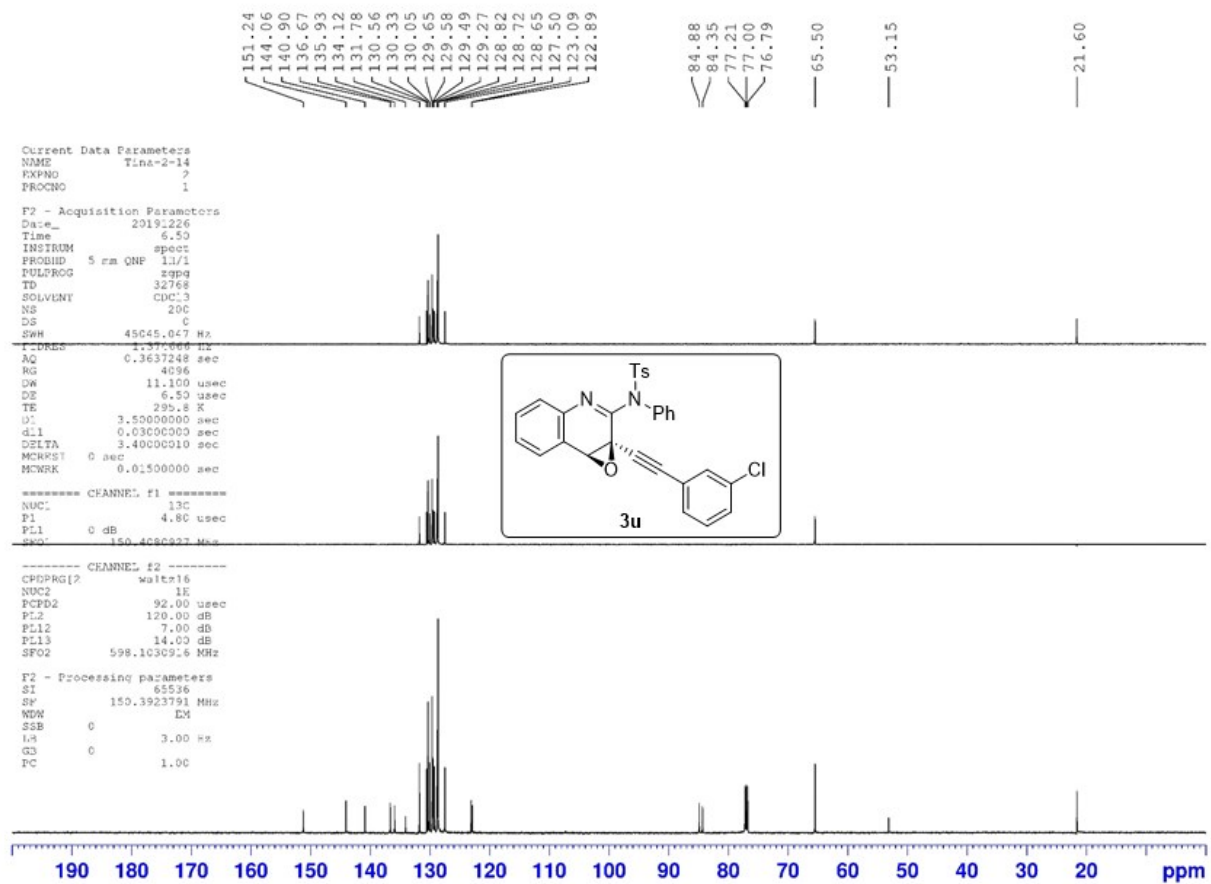

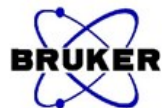

tina-1-206  
down

Current Data Parameters  
NAME 20191107  
EXPNO 2  
PROCNO 1

F2 - Acquisition Parameters  
Date\_ 20191107  
Time 11:53  
INSTRUM spect  
PROBHD 5 mm DUL 13C-1  
PULPROG zg30  
TD 32768  
SOLVENT CDCl3  
NS 24  
DS 0  
SWH 6410.256 Hz  
FIDRES 0.195625 Hz  
AQ 2.5559540 sec  
RG 406  
DM 79.000 usec  
DE 6.00 usec  
TE 300.0 K  
D1 2.0000000 sec  
TDO 1

----- CHANNEL f1 -----  
NUC1 13C  
P1 10.00 usec  
PL1 -2.40 dB  
SFO1 400.1528010 MHz

F2 - Processing parameters  
SI 16384  
SF 400.1500172 MHz  
WDW EM  
SSB 0  
LA 0.00 Hz  
GB 0  
PC 1.00

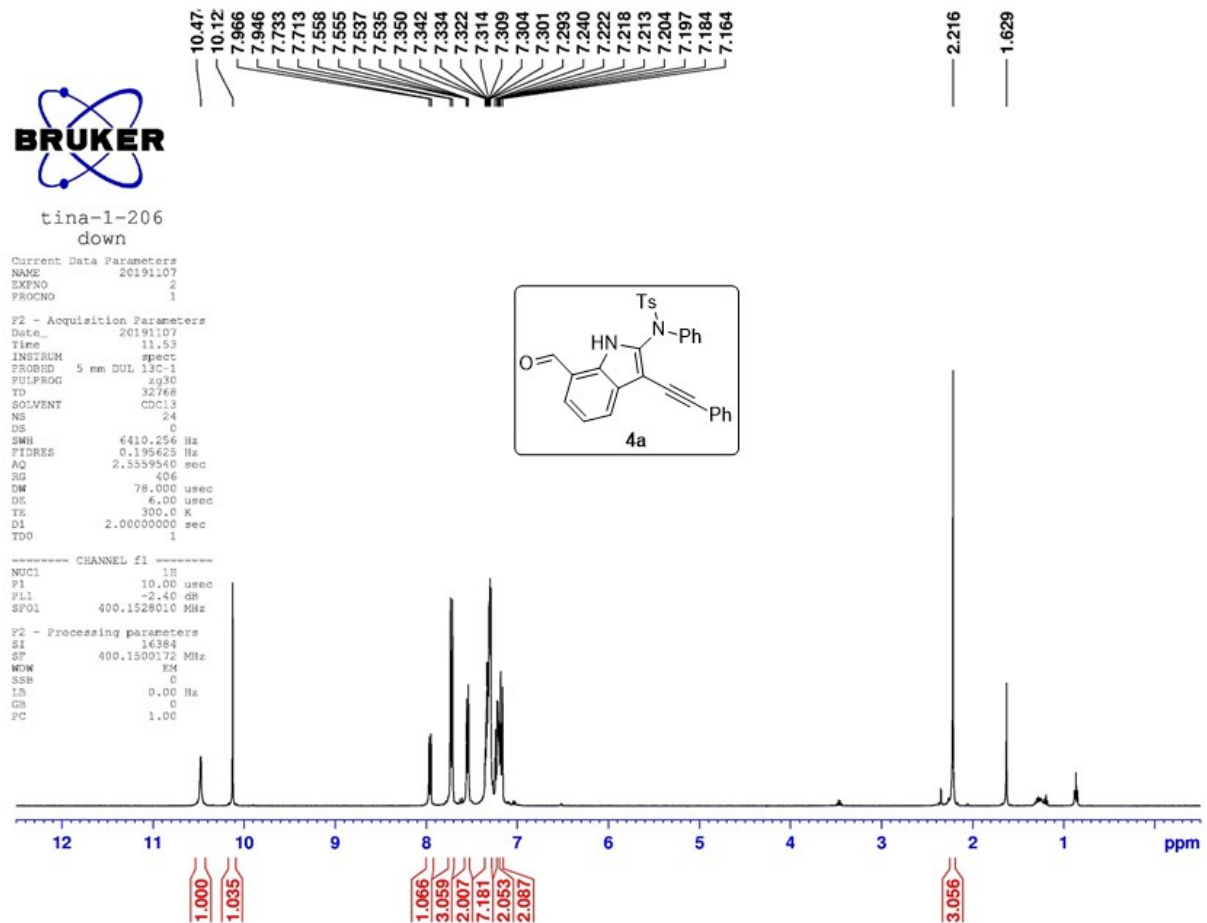

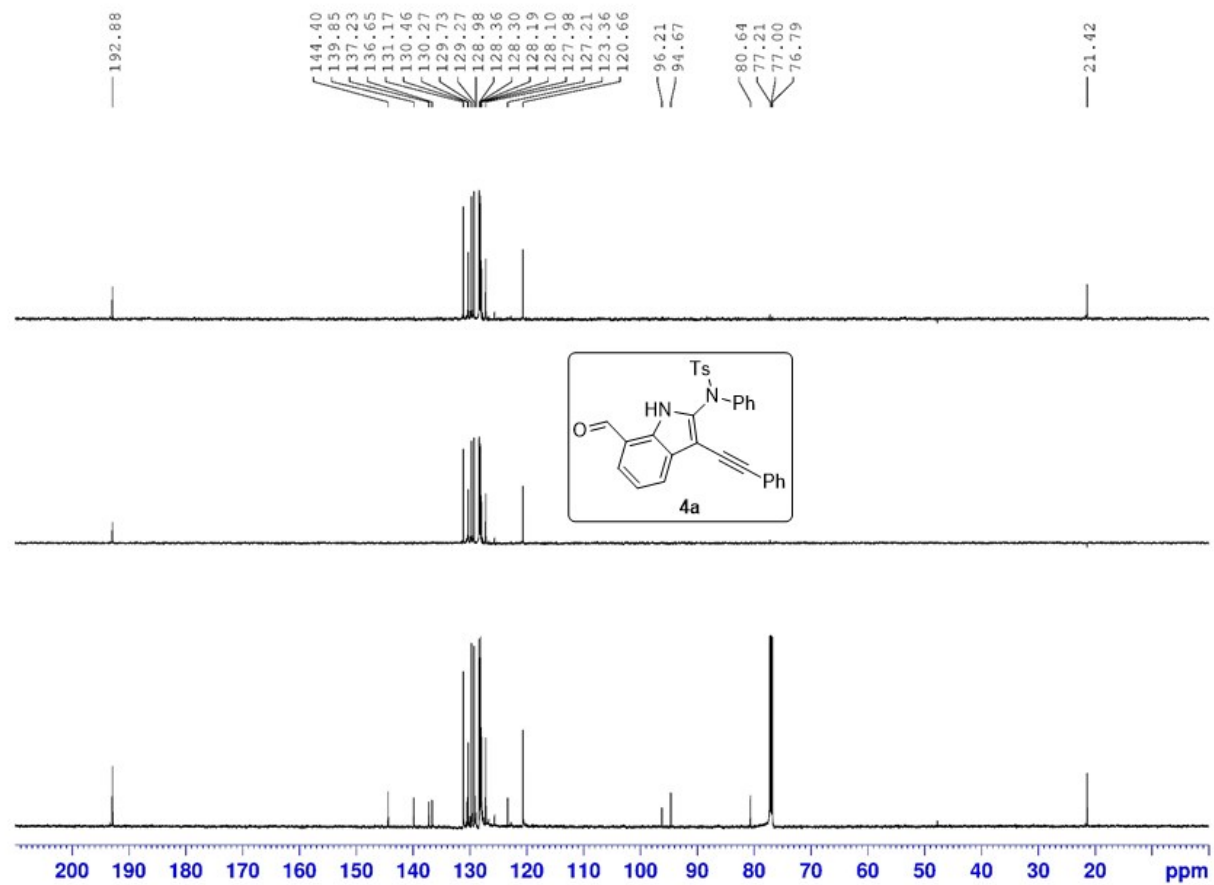

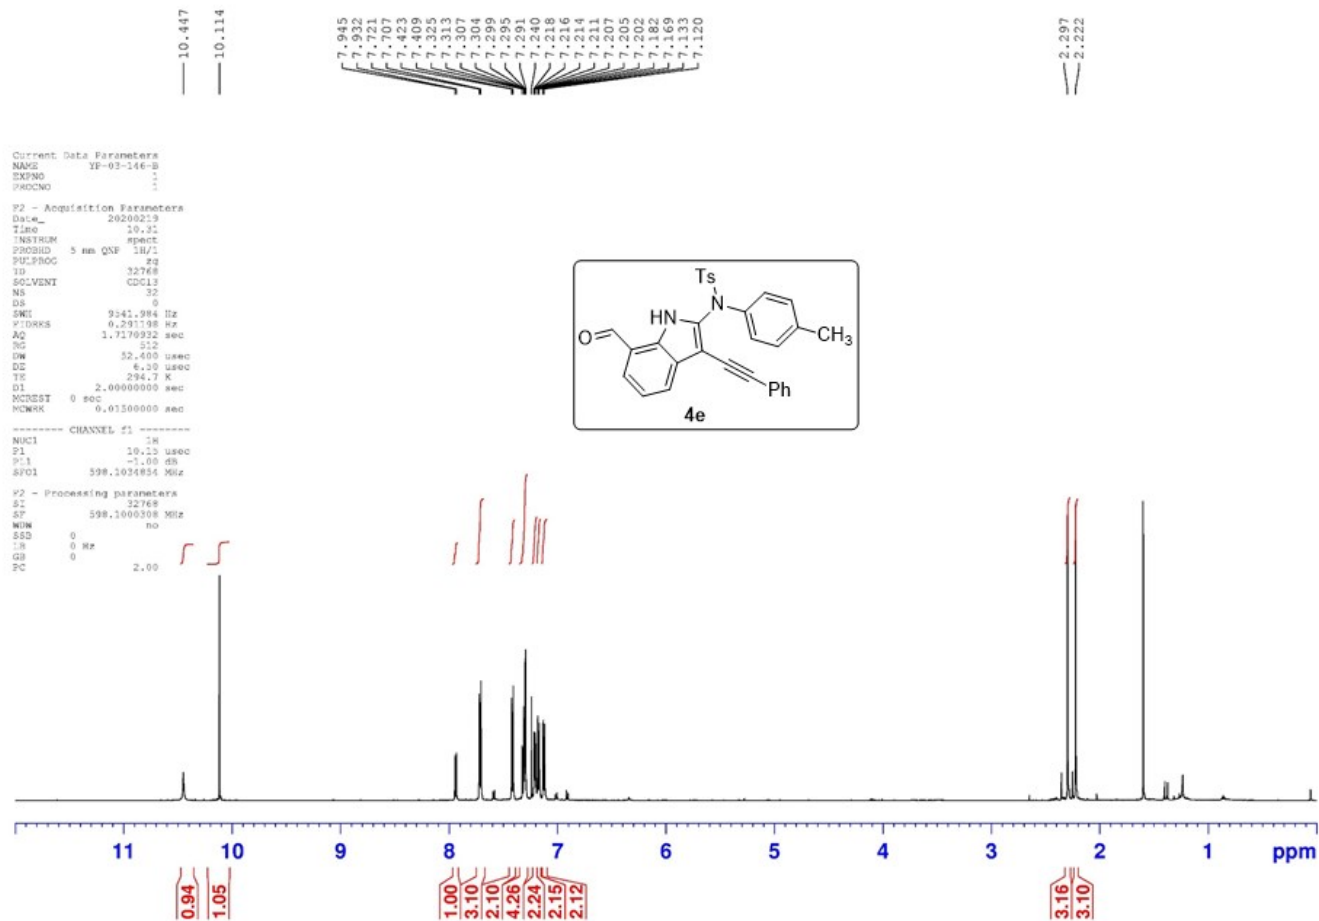



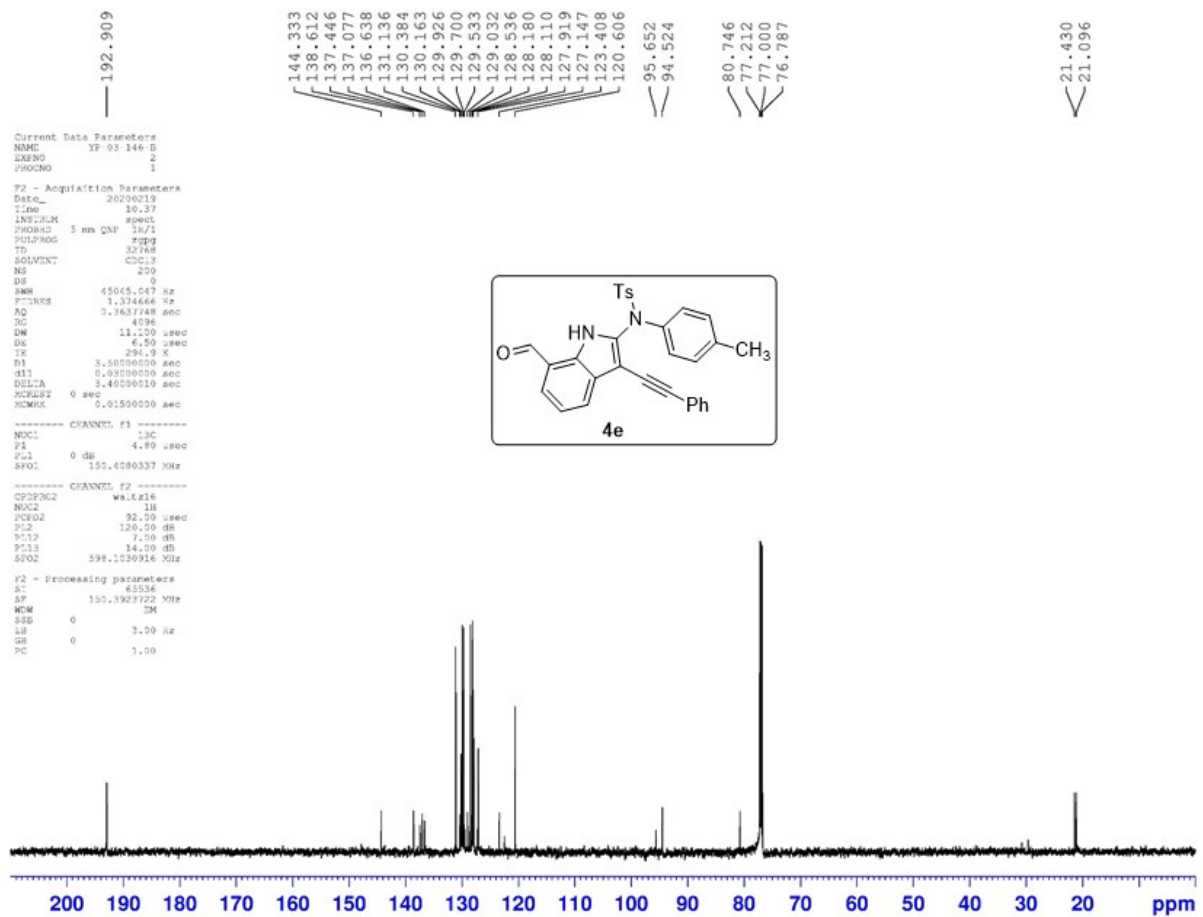

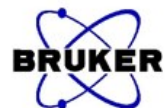

tina-2-6

Current Data Parameters  
NAME 20191213  
EXPNO 1  
PROCNO 1

F2 - Acquisition Parameters  
Date\_ 20191213  
Time 11.28  
INSTRUM spect  
PROBHD 5 mm DUL 13C-1  
PULPROG zg30  
TD 32768  
SOLVENT CDCl3  
NS 14  
DS 0  
SWH 6410.254 Hz  
FIDRES 0.195623 Hz  
AQ 2.5559540 sec  
RG 101  
DW 79.000 usec  
DE 6.00 usec  
TE 300.0 K  
D1 2.0000000 sec  
TDO 1

----- CHANNEL f1 -----  
NUC1 13  
P1 10.00 usec  
PL1 -2.40 db  
SFO1 400.1528010 MHz

F2 - Processing parameters  
SI 16384  
SF 400.1500168 MHz  
WDW EM  
SSB 0  
LB 0.00 Hz  
GB 0  
PC 1.00

10.14  
10.01

7.913  
7.893  
7.699  
7.679  
7.627  
7.609  
7.389  
7.371  
7.326  
7.262  
7.263  
7.232  
7.223  
7.205  
7.186  
7.172  
7.153

5.074

2.157

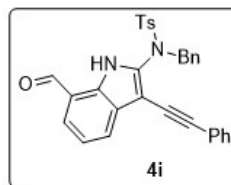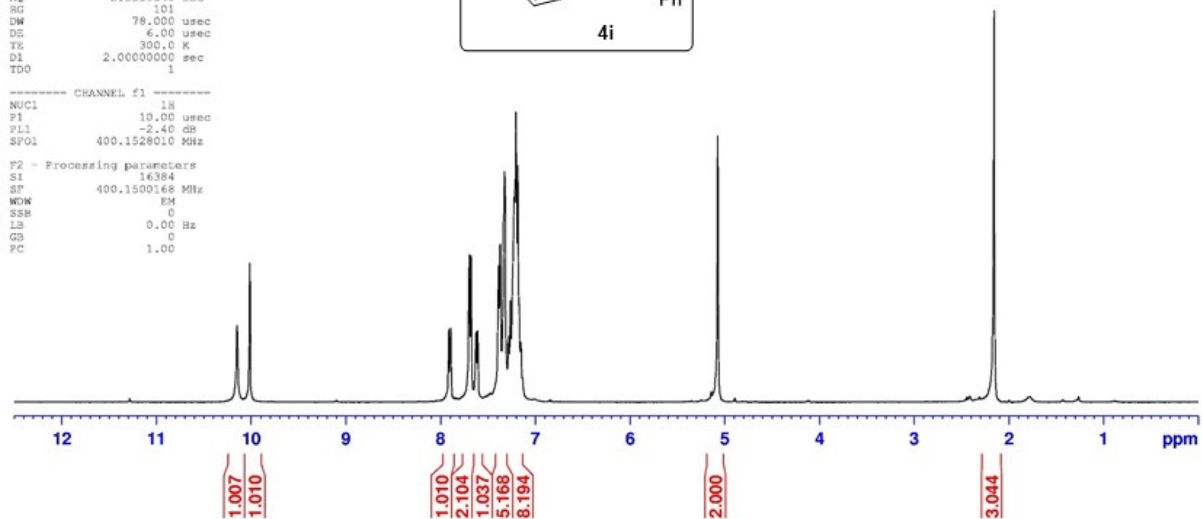

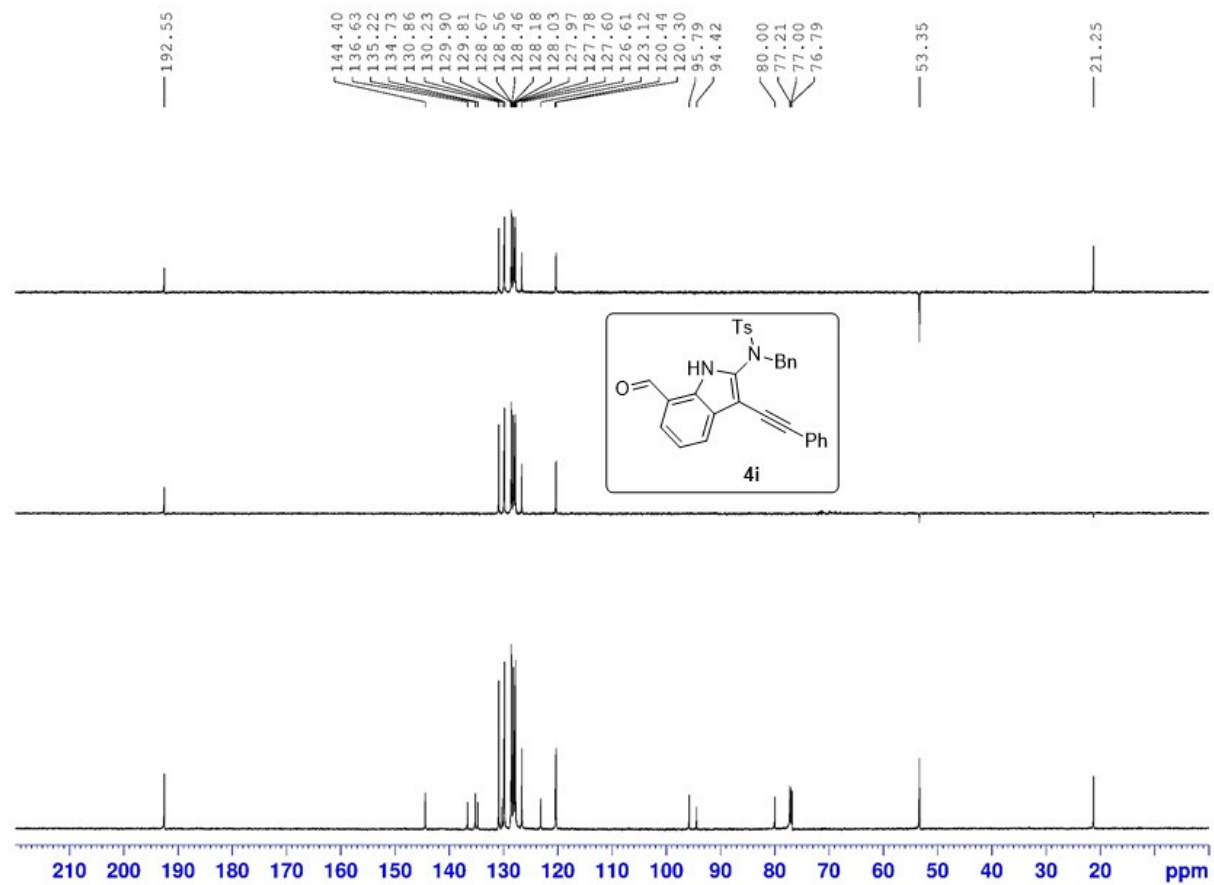

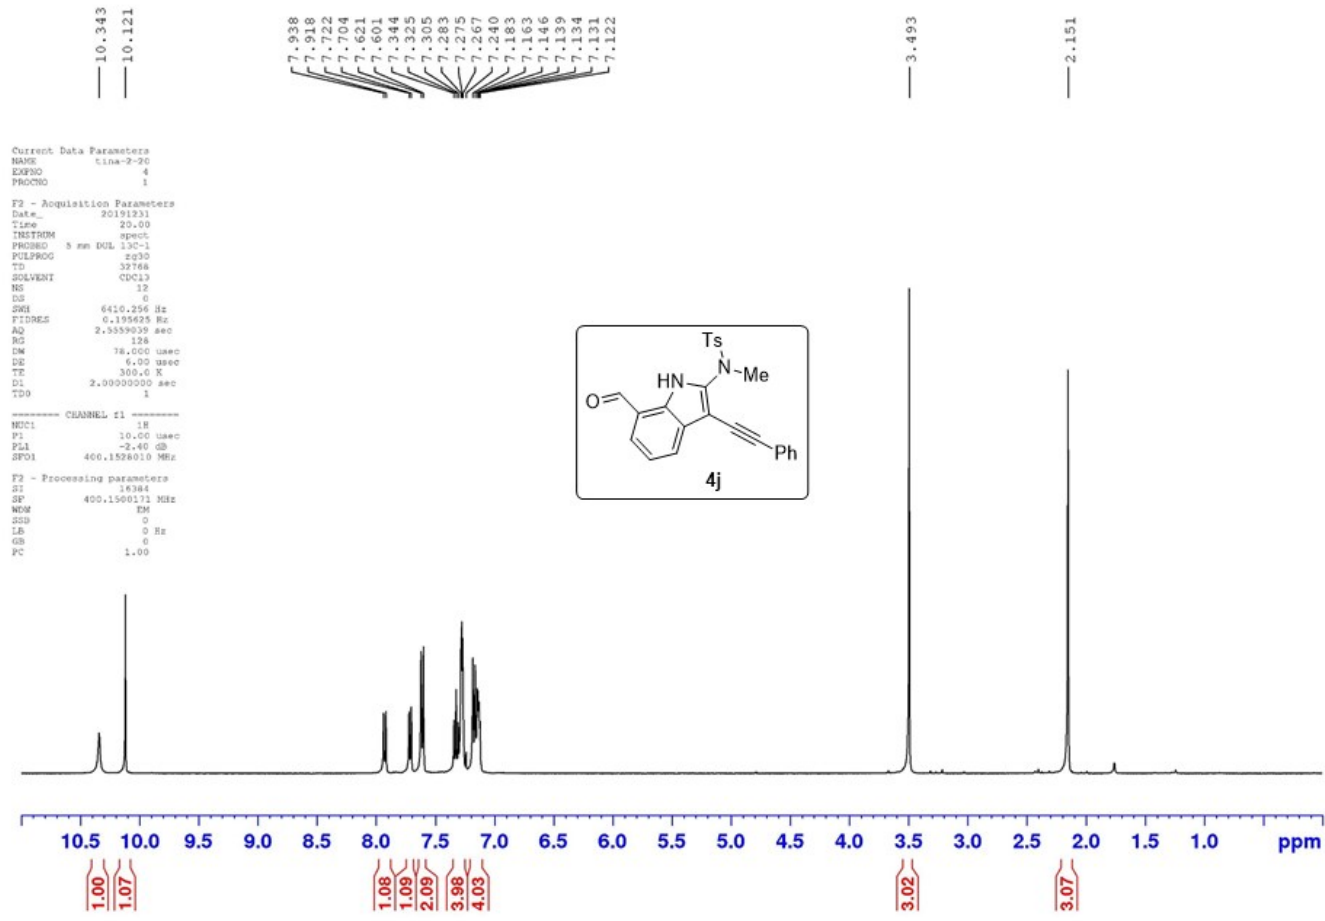

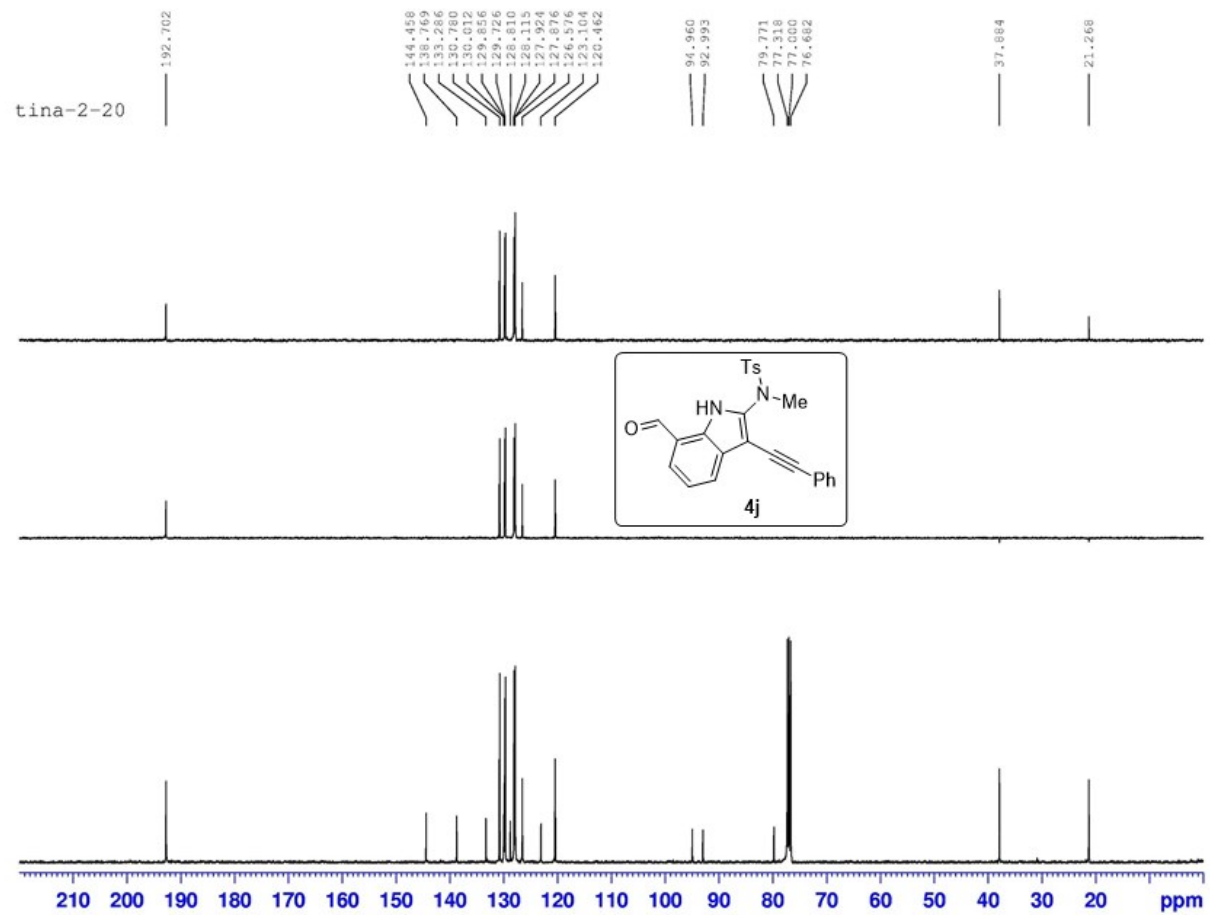

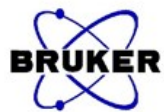

tina-2-19  
prep wash

Current Data Parameters  
NAME 20200102  
EXPNO 3  
PROCNO 1

F2 - Acquisition Parameters  
Date\_ 20200102  
Time 20.01  
INSTRUM spect  
PROBHD 5 mm DUL 13C-1  
PULPROG zg30  
TD 32768  
SOLVENT CDCl3  
NS 11  
DS 0  
SWH 6410.256 Hz  
FIDRES 0.195625 Hz  
AQ 2.5559540 sec  
RG 114  
SW 78.000 usec  
DE 6.00 usec  
TE 300.0 K  
SI 2.00000000 sec  
TD0 1

----- CHANNEL f1 -----  
NUC1 13  
P1 10.00 usec  
PL1 -2.40 dB  
SFO1 400.1528010 MHz

F2 - Processing parameters  
SI 16384  
SF 400.1500172 MHz  
WDW EM  
SSB 0  
LB 0.00 Hz  
GB 0  
FC 1.00

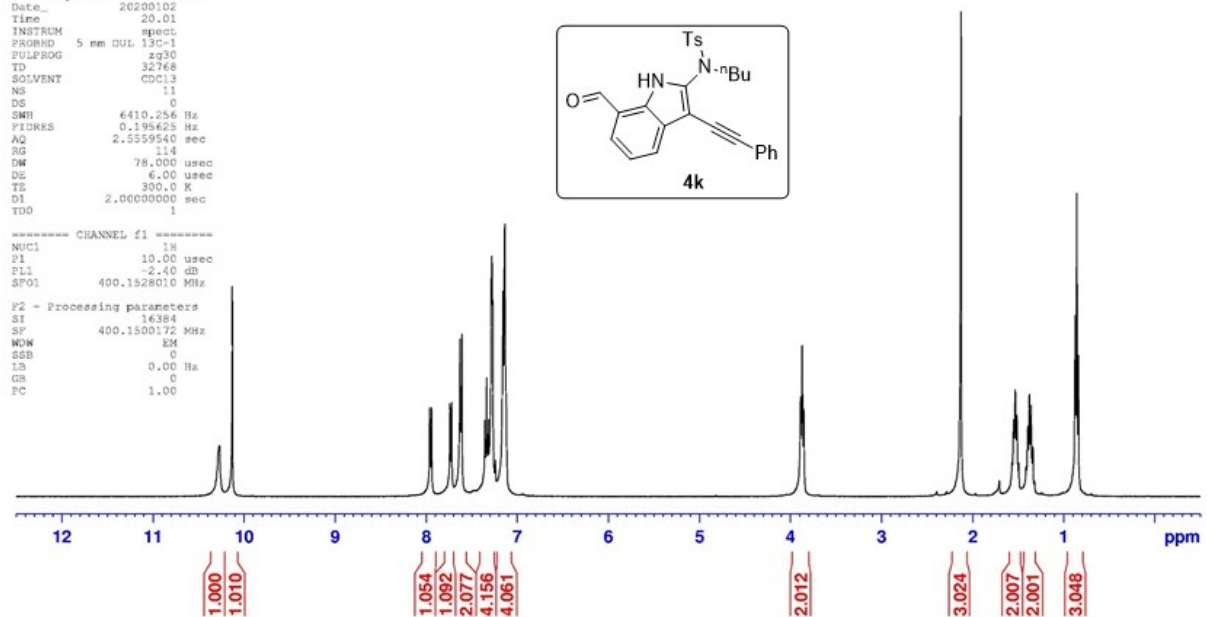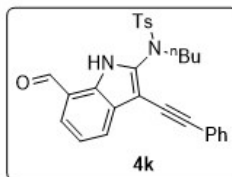

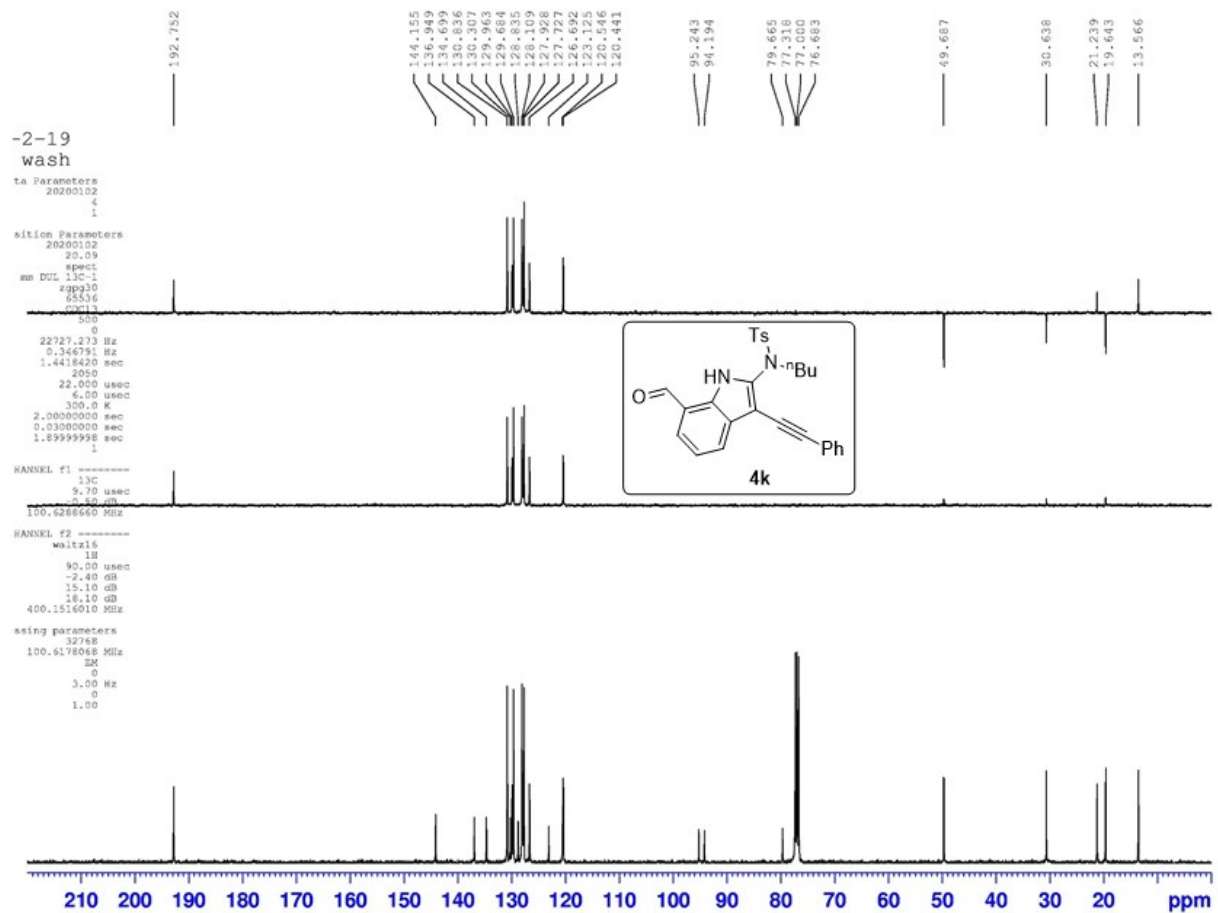

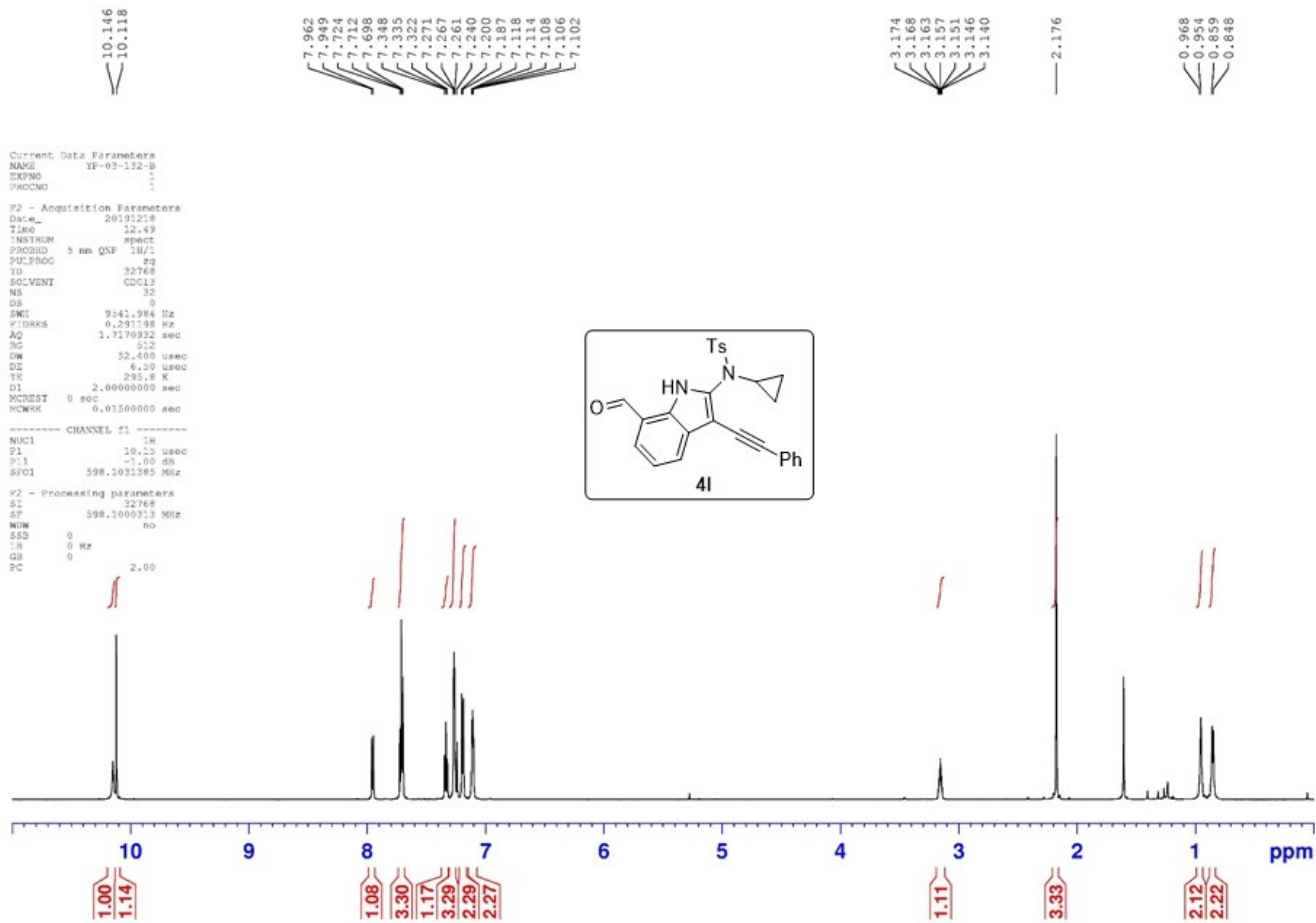



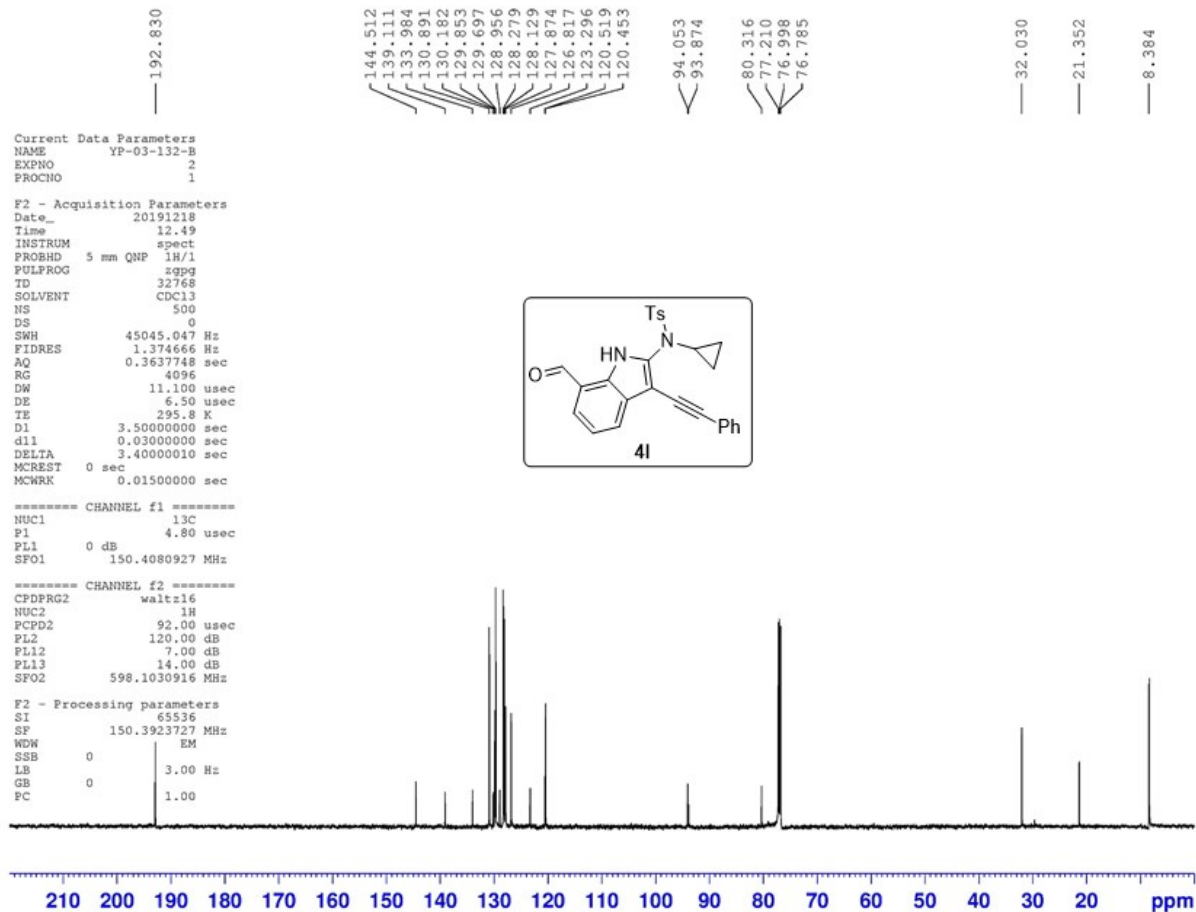



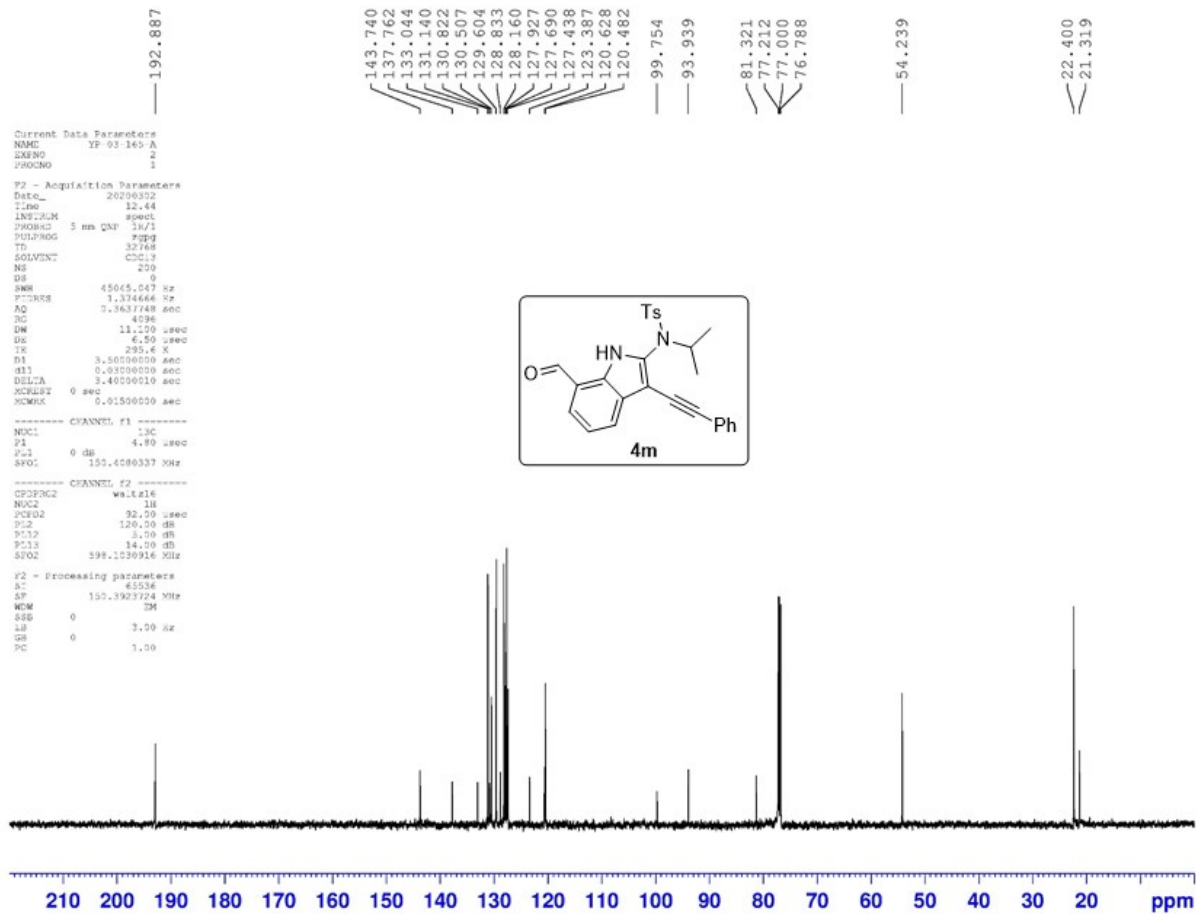

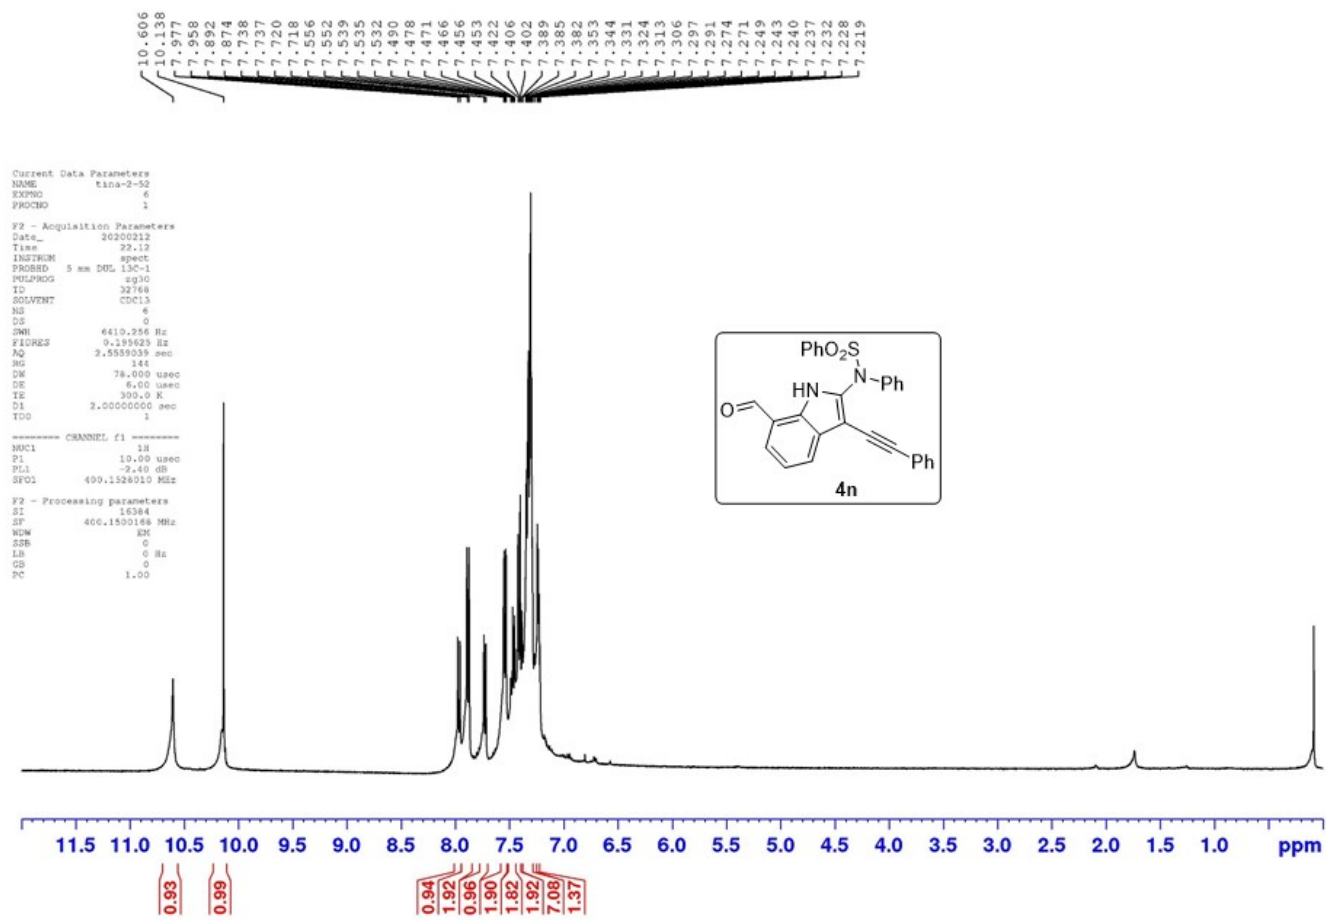

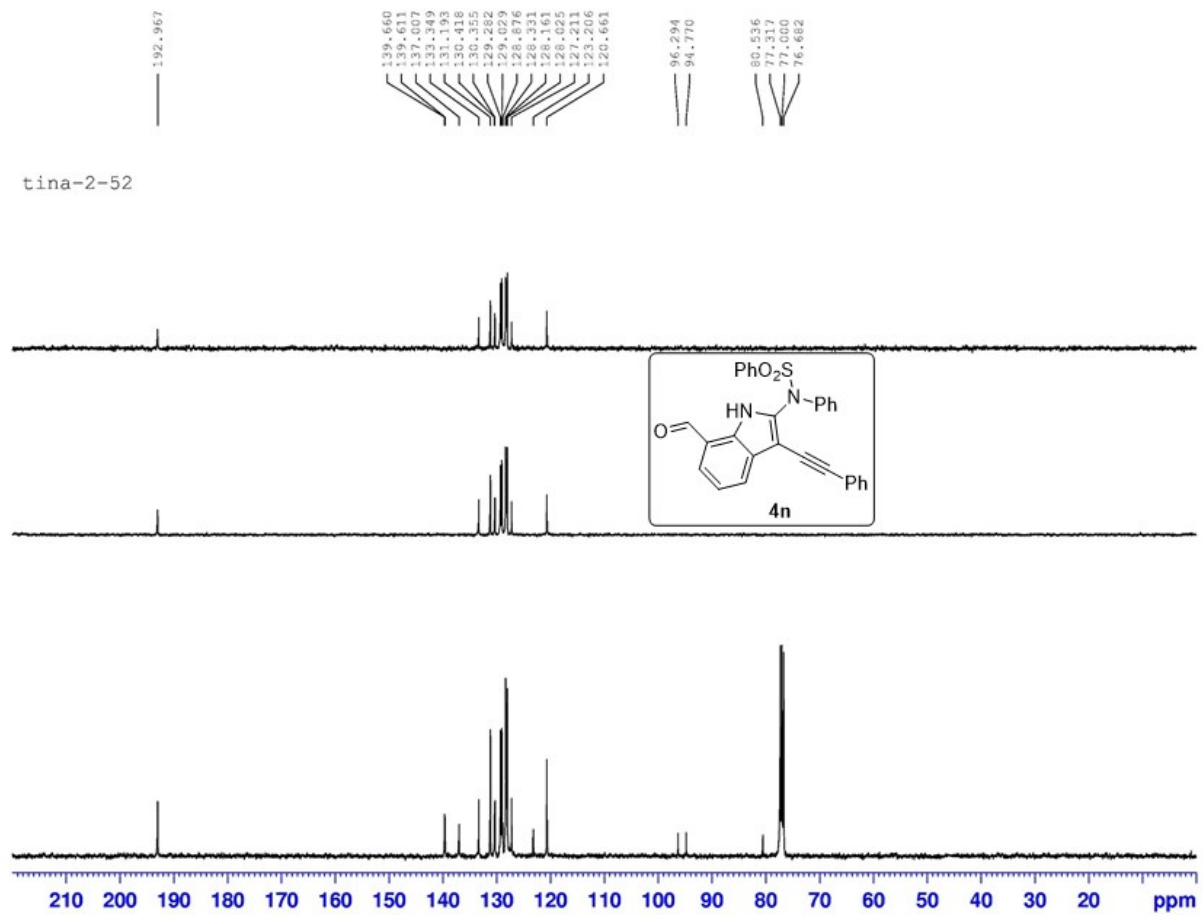

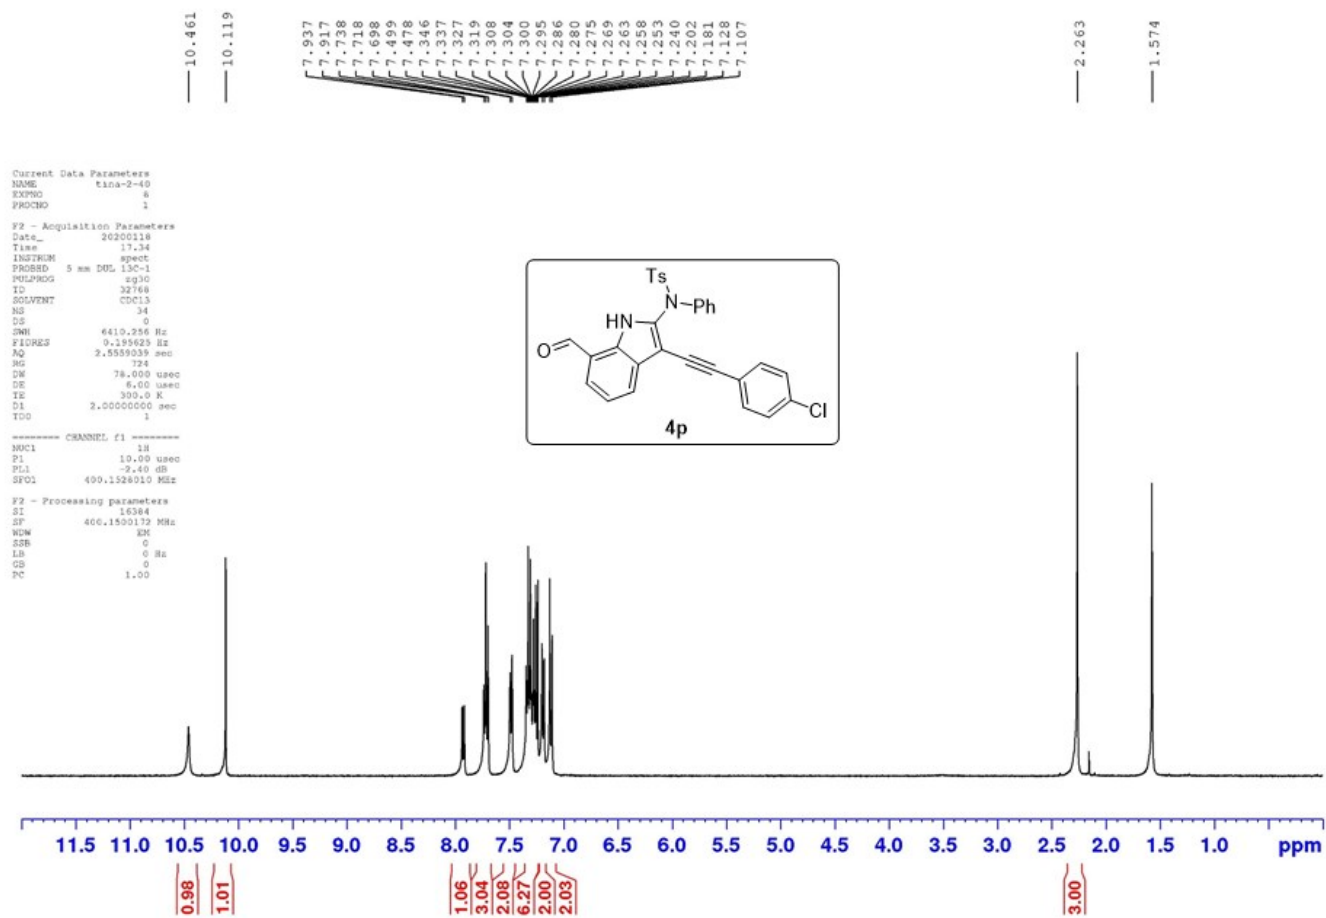

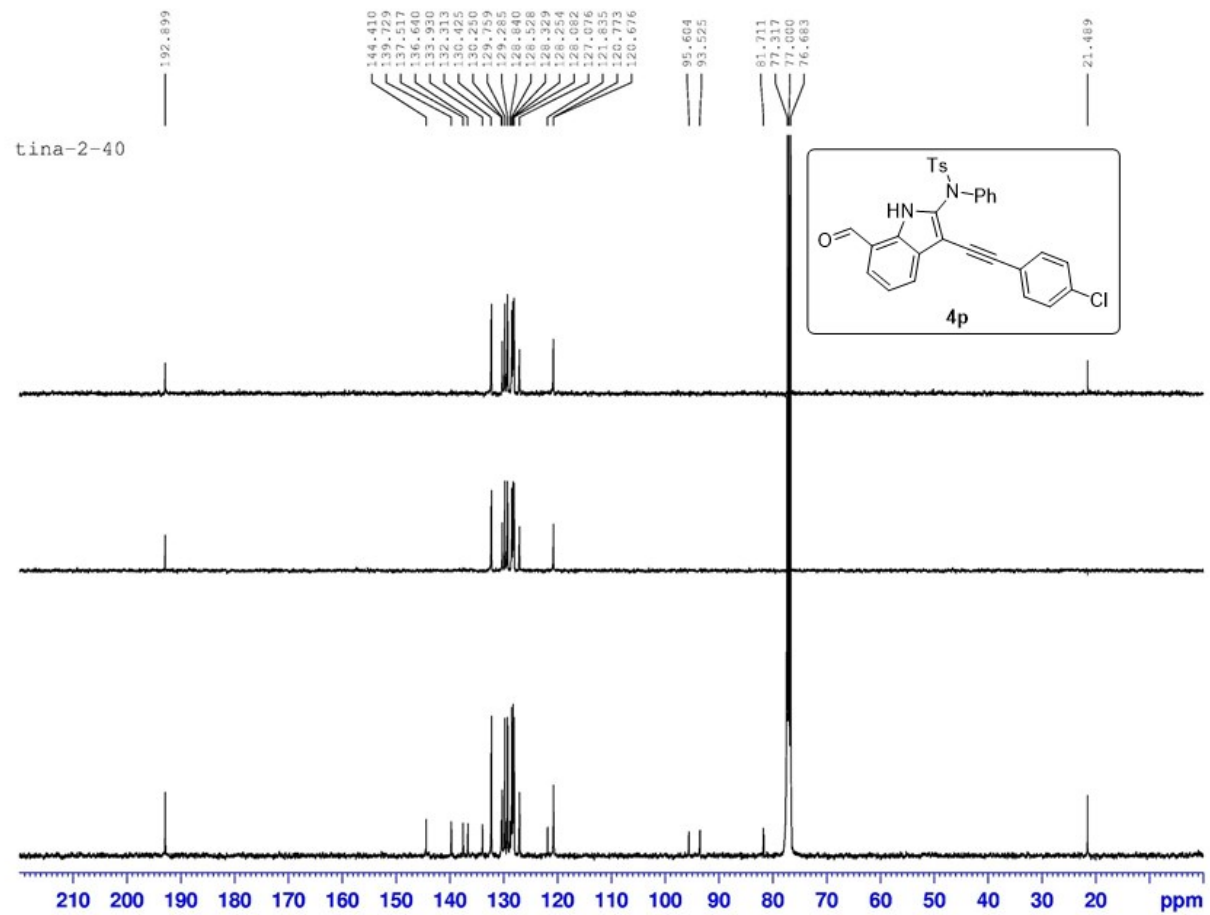

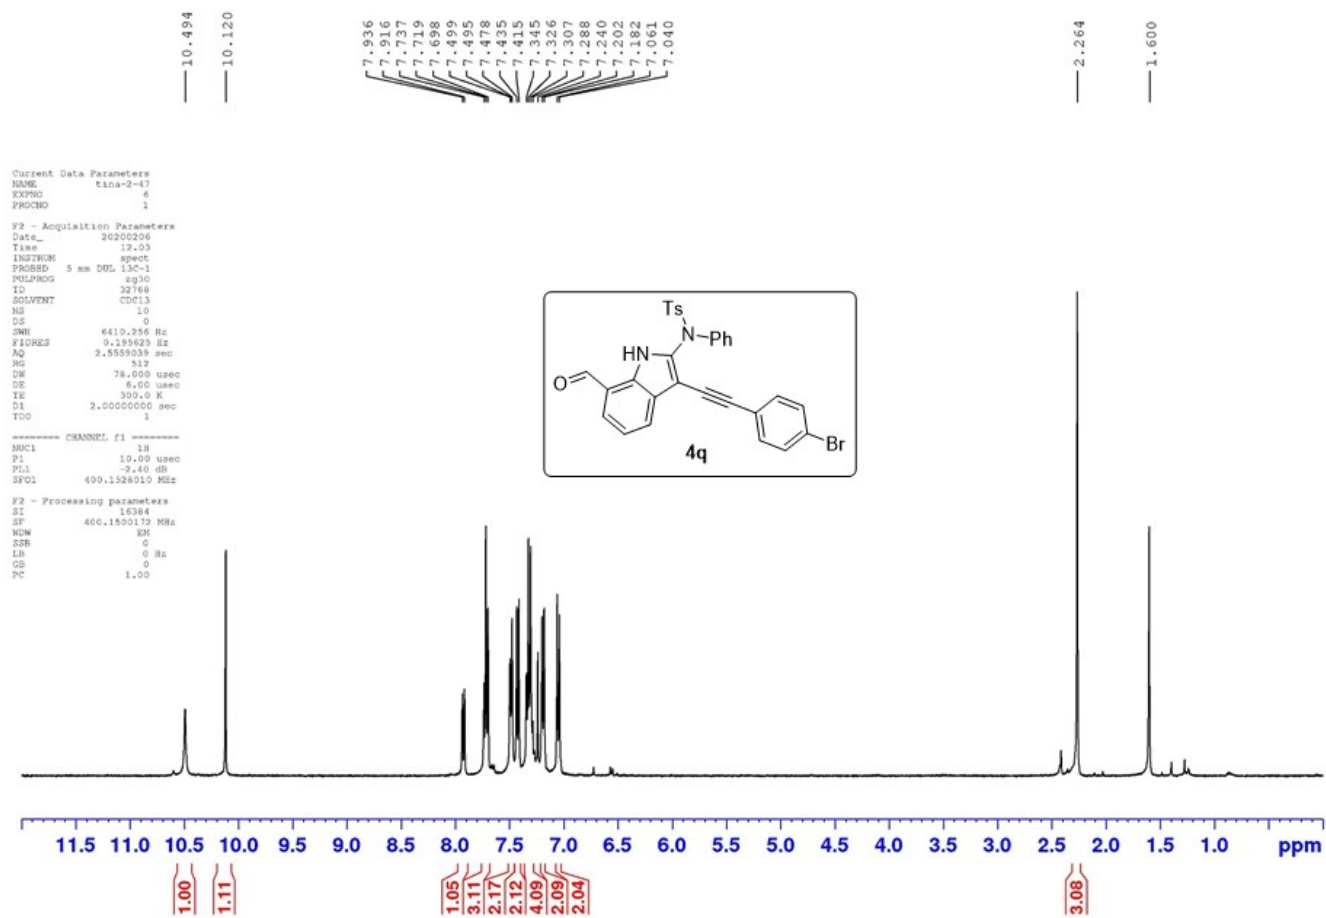



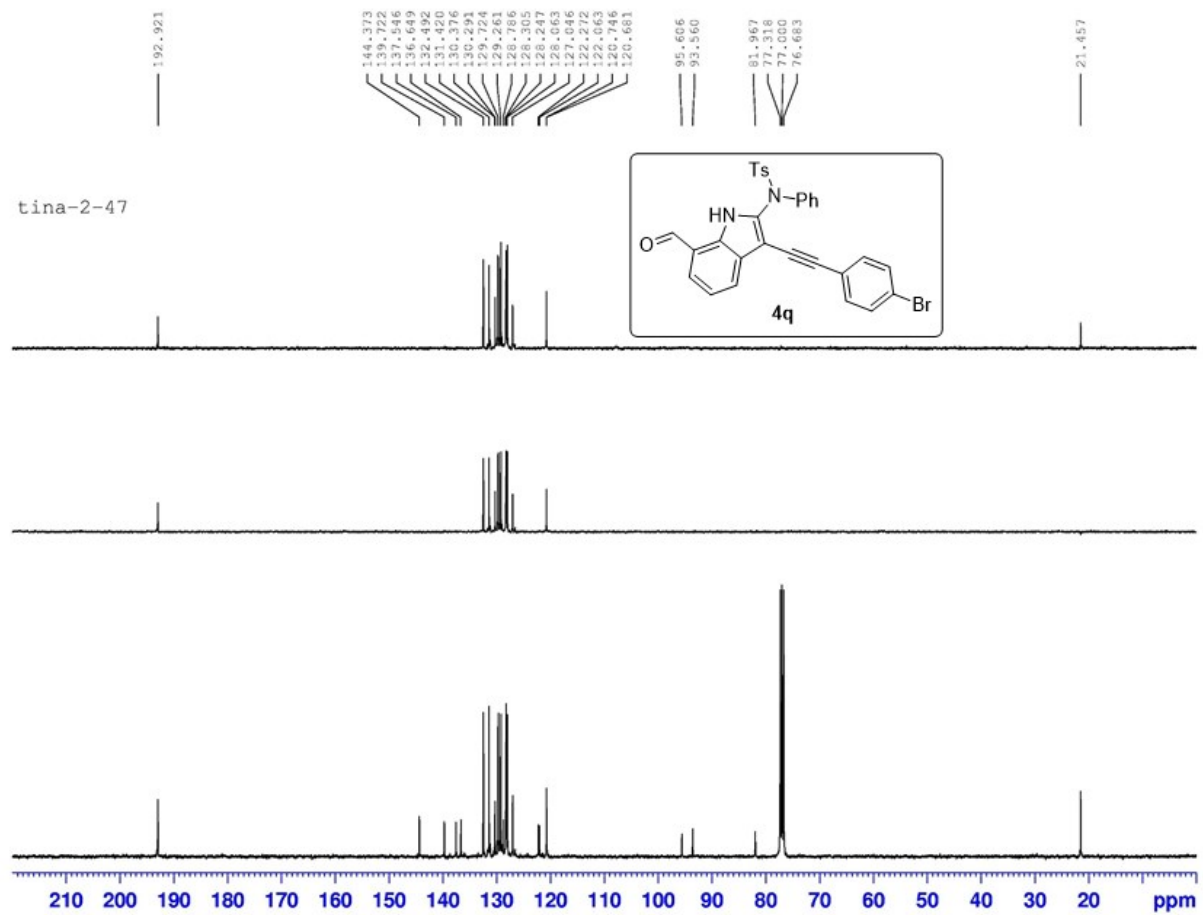



tina-2-59

Current Data Parameters  
NAME 20200217  
EXPNO 5  
PROCNO 1

F2 - Acquisition Parameters  
Date\_ 20200217  
Time 20.36  
INSTRUM spect  
PROBHD 5 mm DUL 13C-1  
PULPROG zg30  
TD 32768  
SOLVENT CDCl3  
NS 37  
DS 0  
SWH 6410.256 Hz  
FIDRES 0.195625 Hz  
AQ 2.5559540 sec  
RG 645  
DM 78.000 usec  
DE 6.00 usec  
TE 300.0 K  
D1 2.00000000 sec  
TDO 1

----- CHANNEL f1 -----  
NUC1 1H  
P1 10.00 usec  
PL1 -2.40 dB  
SFO1 400.1528010 MHz  
  
F2 - Processing parameters  
SI 16384  
SF 400.1500171 MHz  
WDW EM  
SSB 0  
LB 0.00 Hz  
GB 0  
PC 1.00

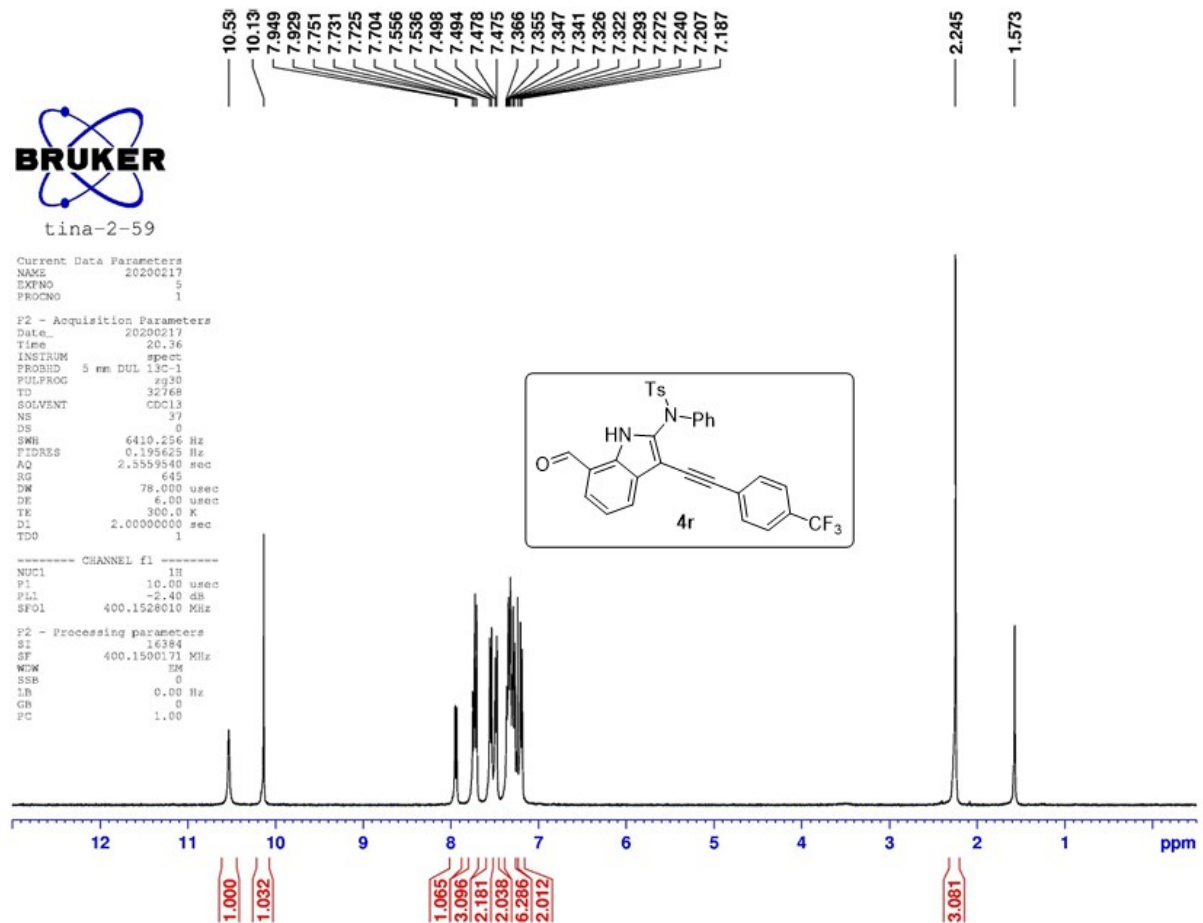

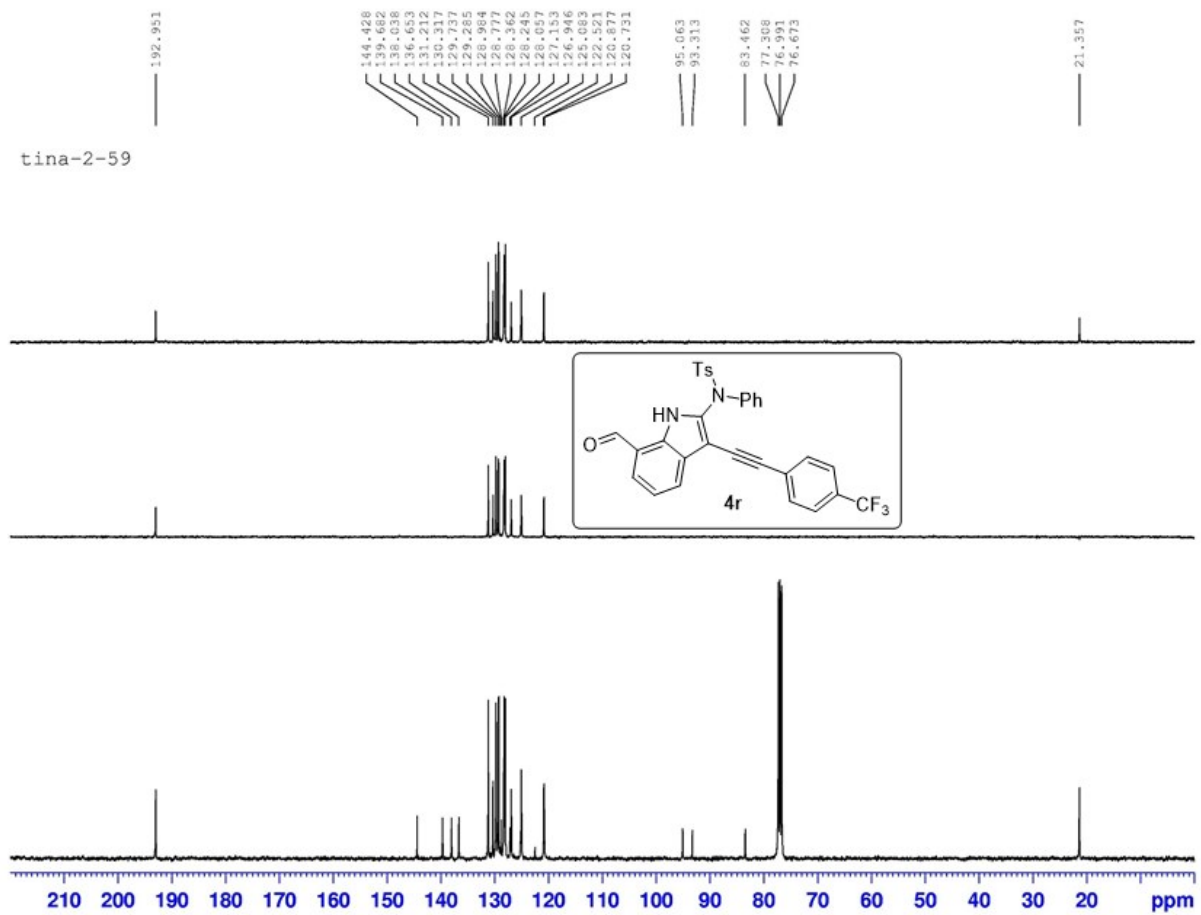



tina-2-48

Current Data Parameters  
NAME 20200205  
EXPNO 7  
PROCNO 1

F2 - Acquisition Parameters  
Date\_ 20200206  
Time 1.15  
INSTRUM spect  
PROBHD 5 mm DUL 13C-1  
PULPROG zg30  
TD 32768  
SOLVENT CDCl3  
NS 25  
DS 0  
SWH 6410.256 Hz  
FIDRES 0.195625 Hz  
AQ 2.5559540 sec  
RG 512  
DM 78.000 usec  
DE 6.00 usec  
TE 300.0 K  
D1 2.00000000 sec  
TDO 1

----- CHANNEL f1 -----  
NUC1 1H  
P1 10.00 usec  
PL1 -2.40 dB  
SFO1 400.1528010 MHz

F2 - Processing parameters  
SI 16384  
SF 400.1500171 MHz  
WDW EM  
SSB 0  
LB 0.00 Hz  
GB 0  
PC 1.00

10.411  
10.111  
7.960  
7.940  
7.728  
7.707  
7.546  
7.542  
7.529  
7.525  
7.522  
7.345  
7.339  
7.332  
7.323  
7.319  
7.313  
7.308  
7.304  
7.296  
7.295  
7.281  
7.279  
7.240  
7.187  
7.167  
7.104

2.360  
2.236

1.597

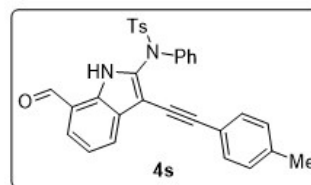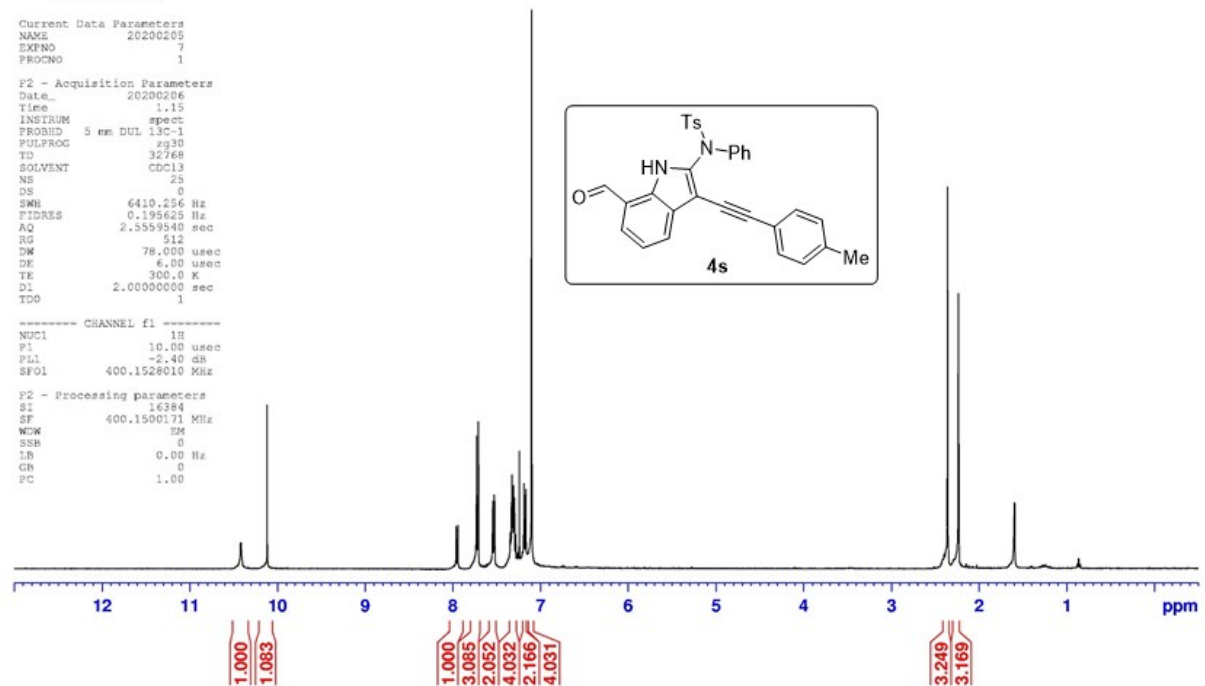

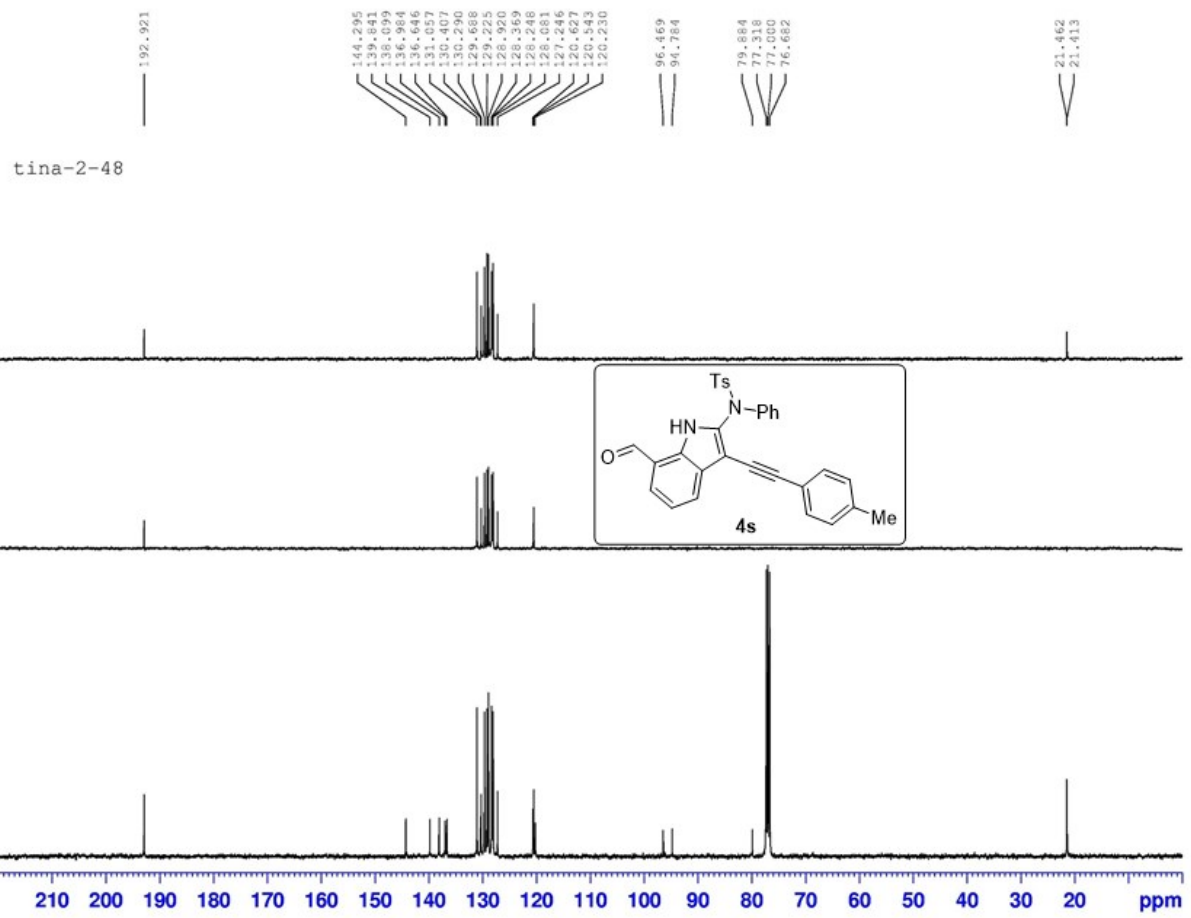

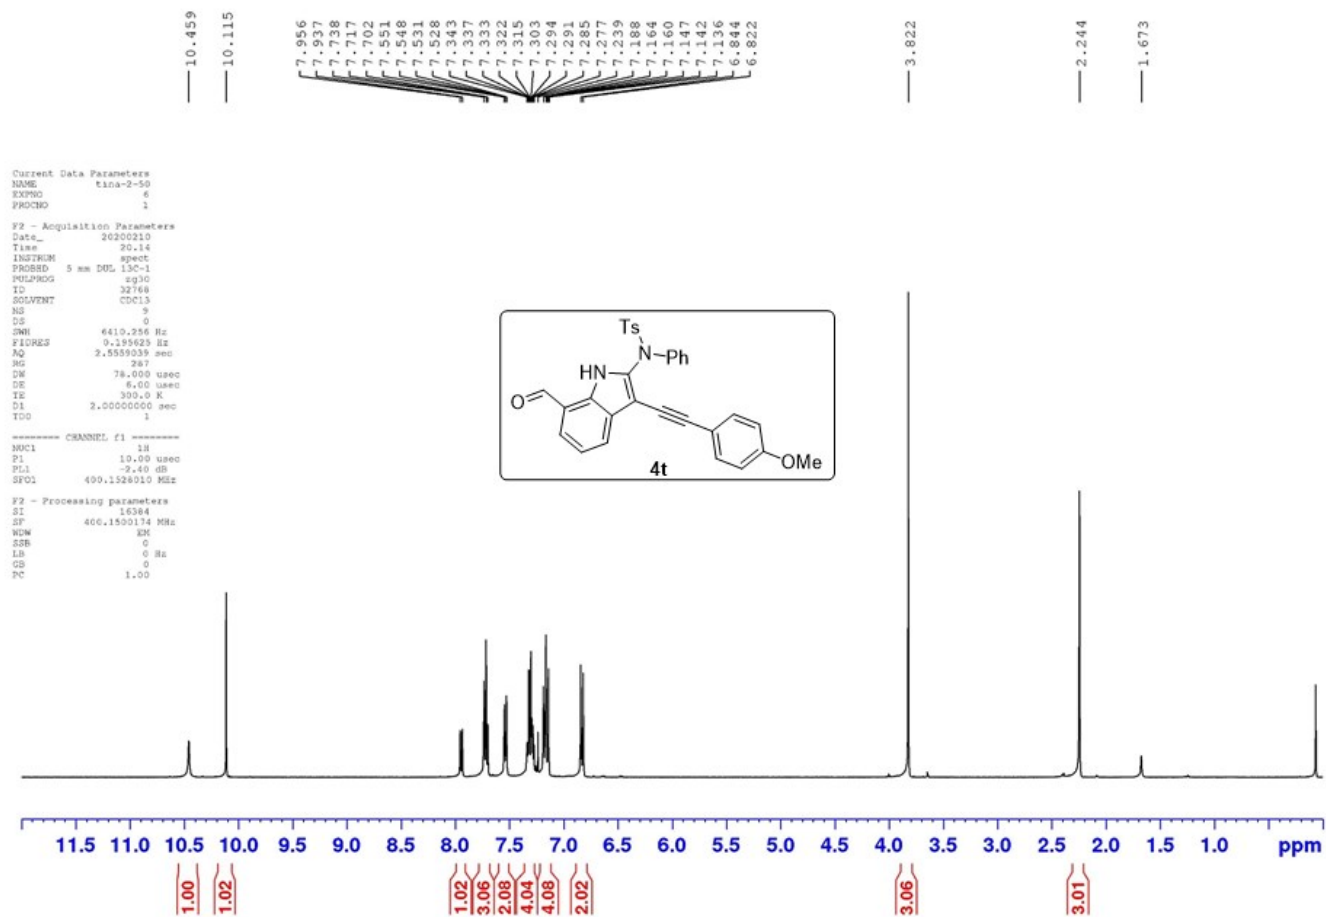

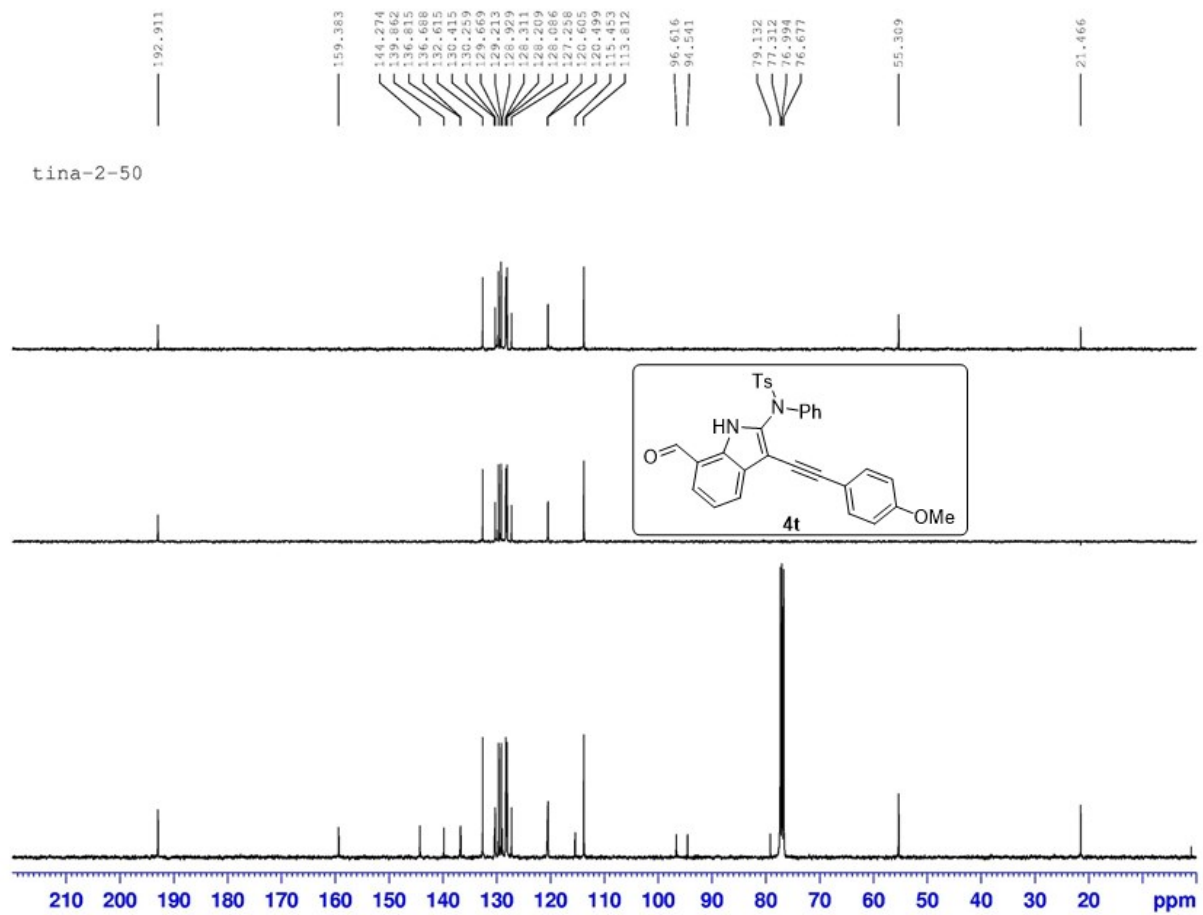

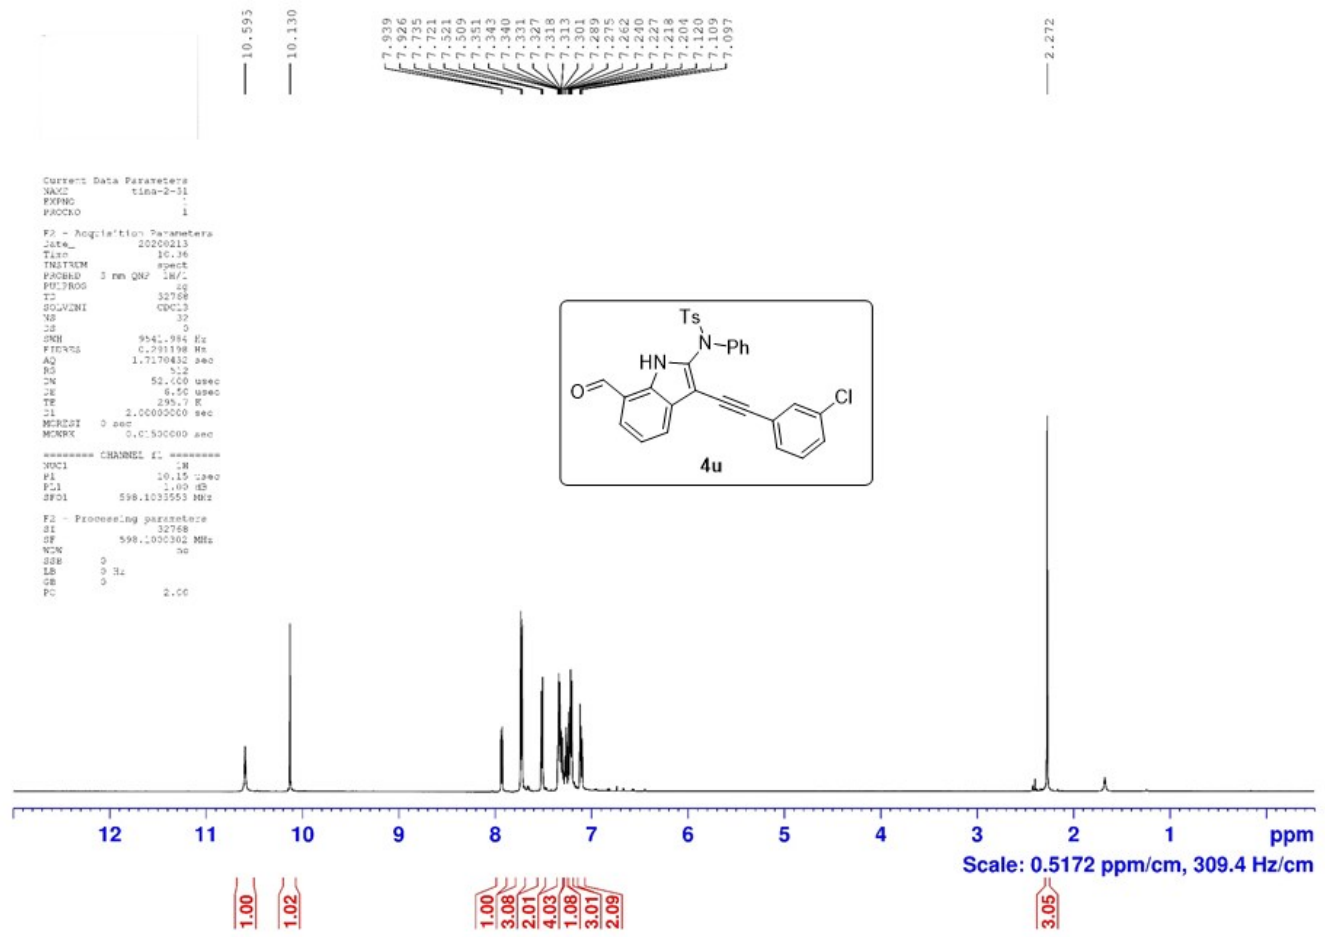



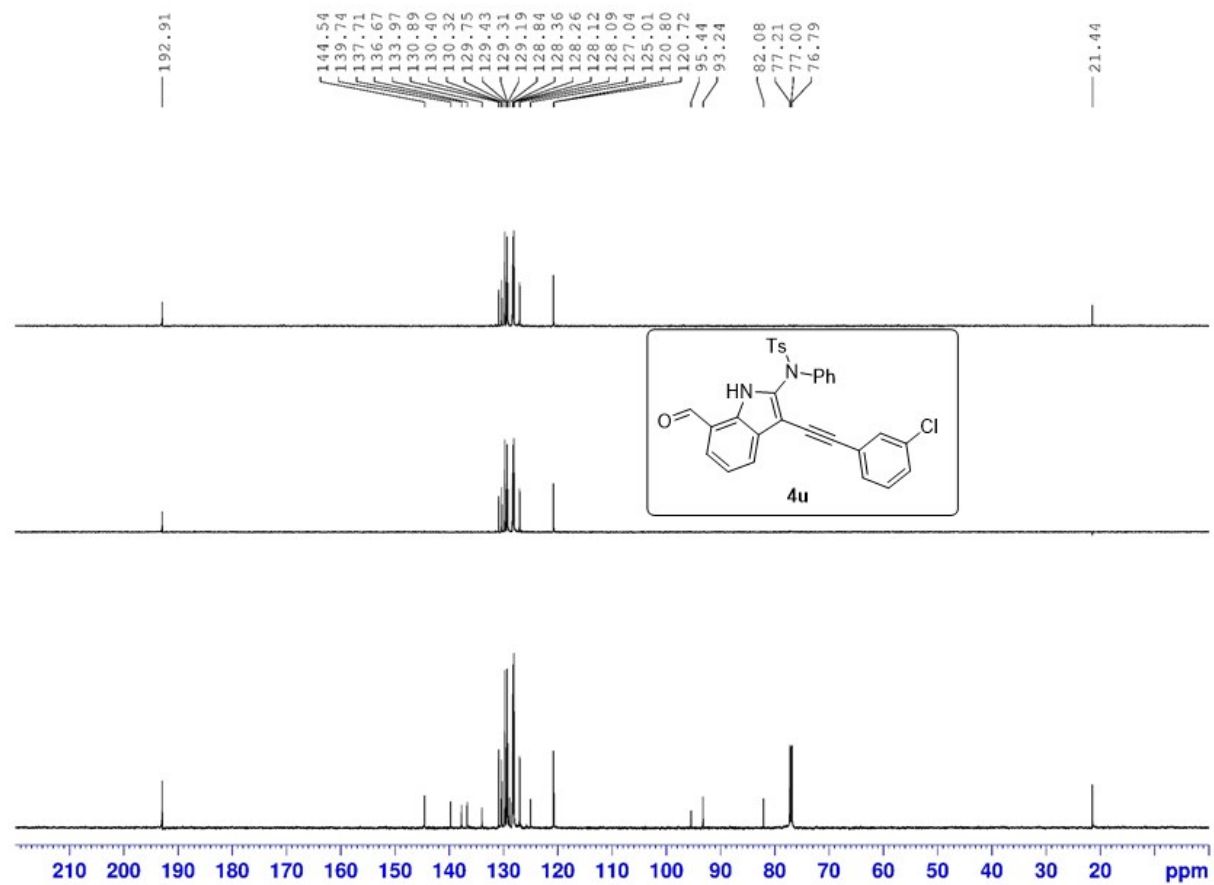

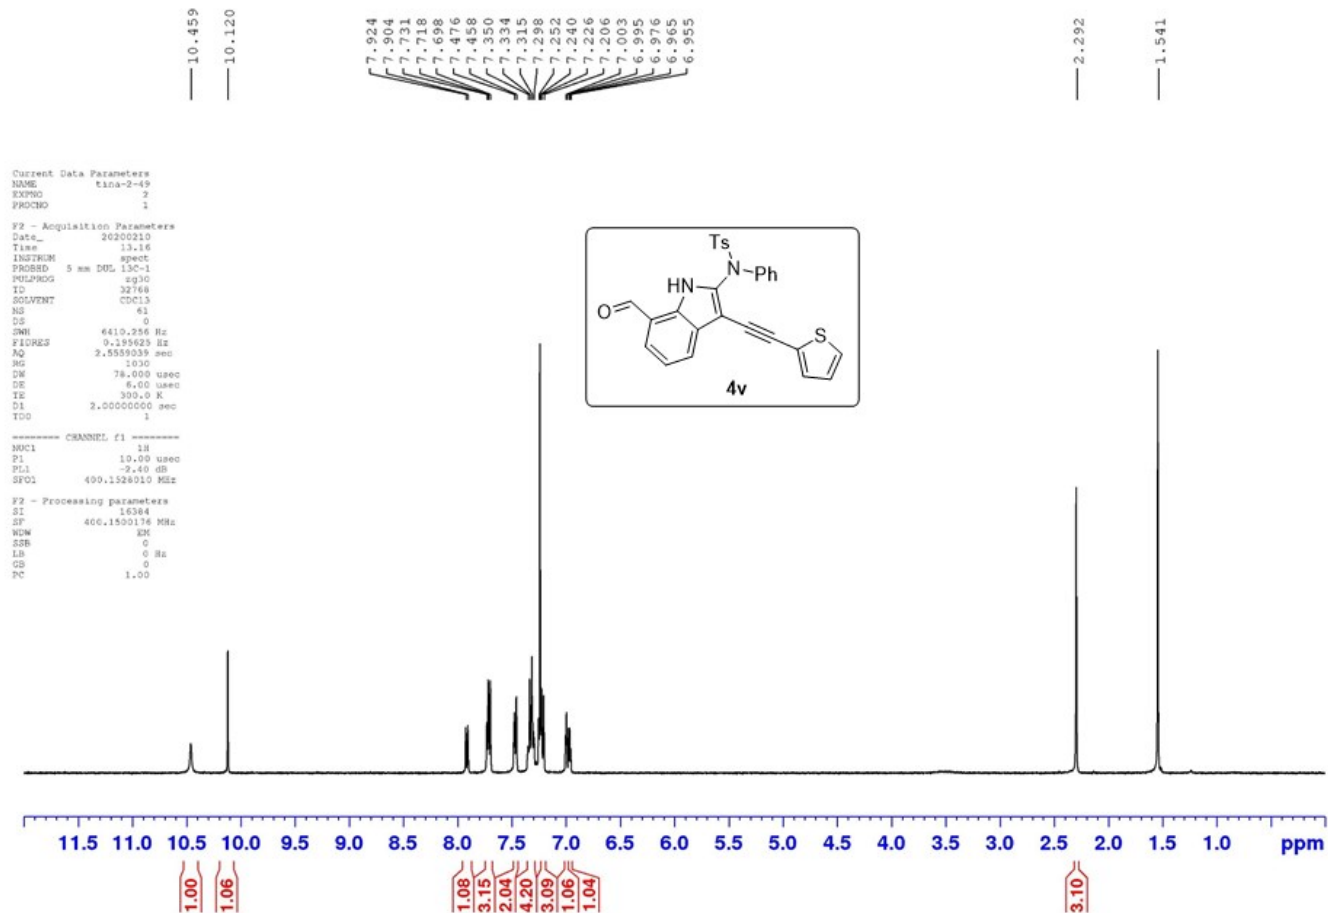

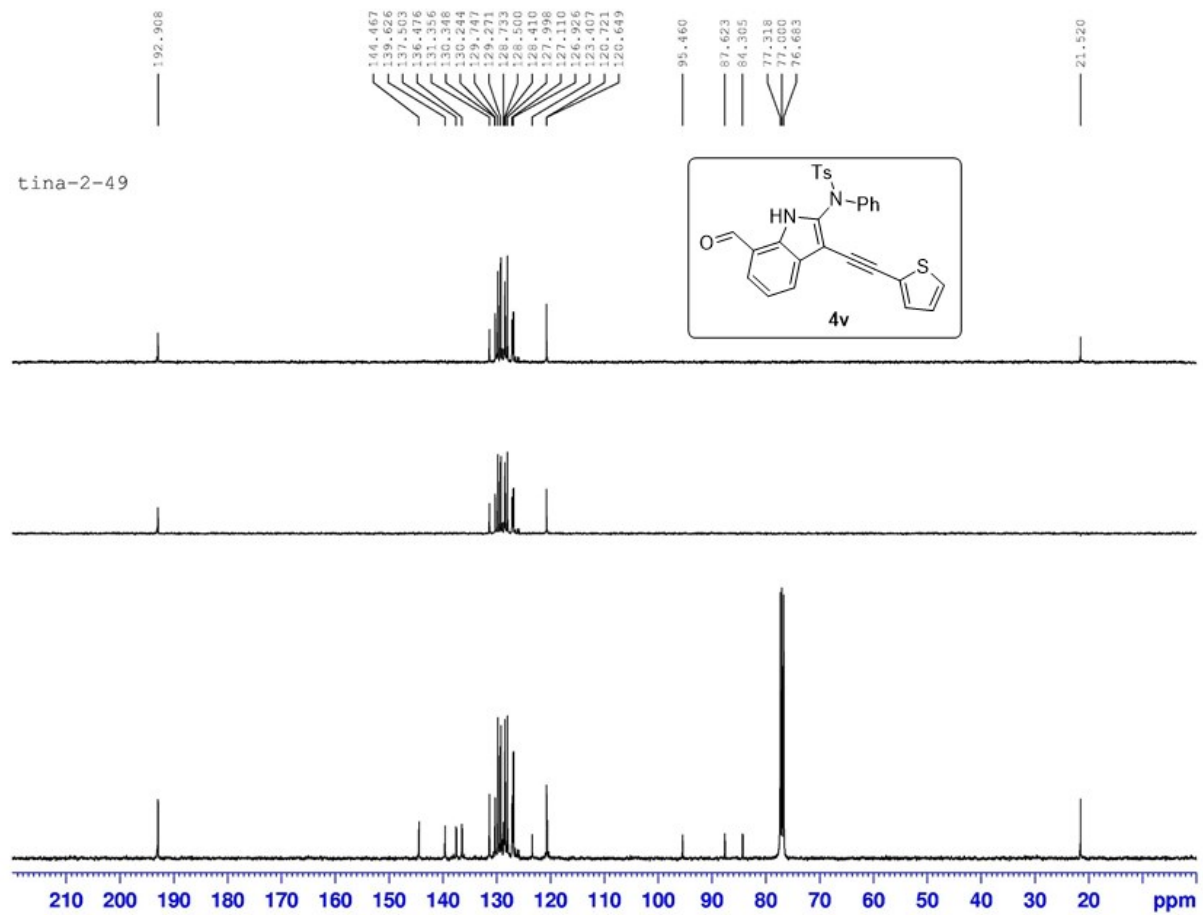

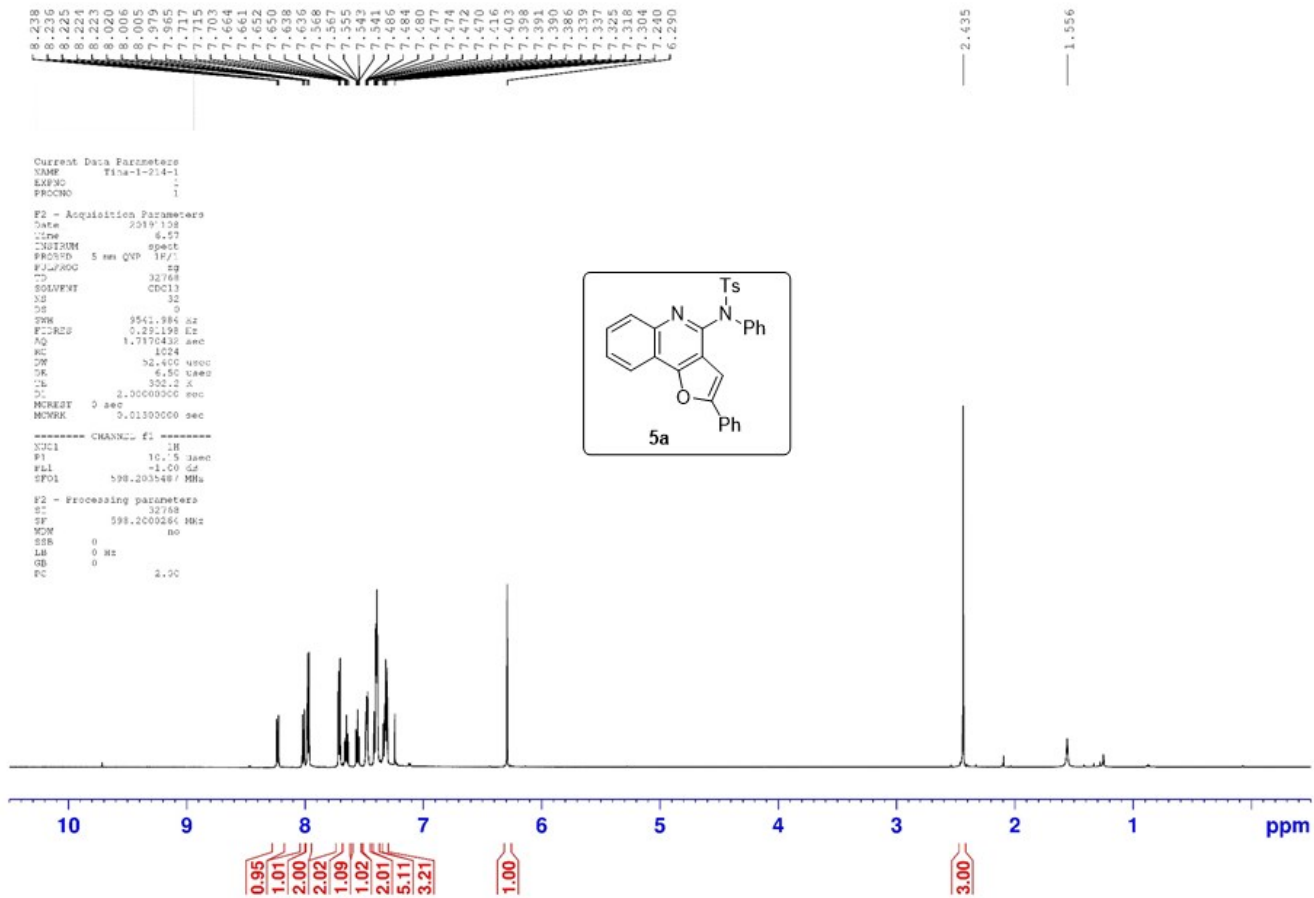

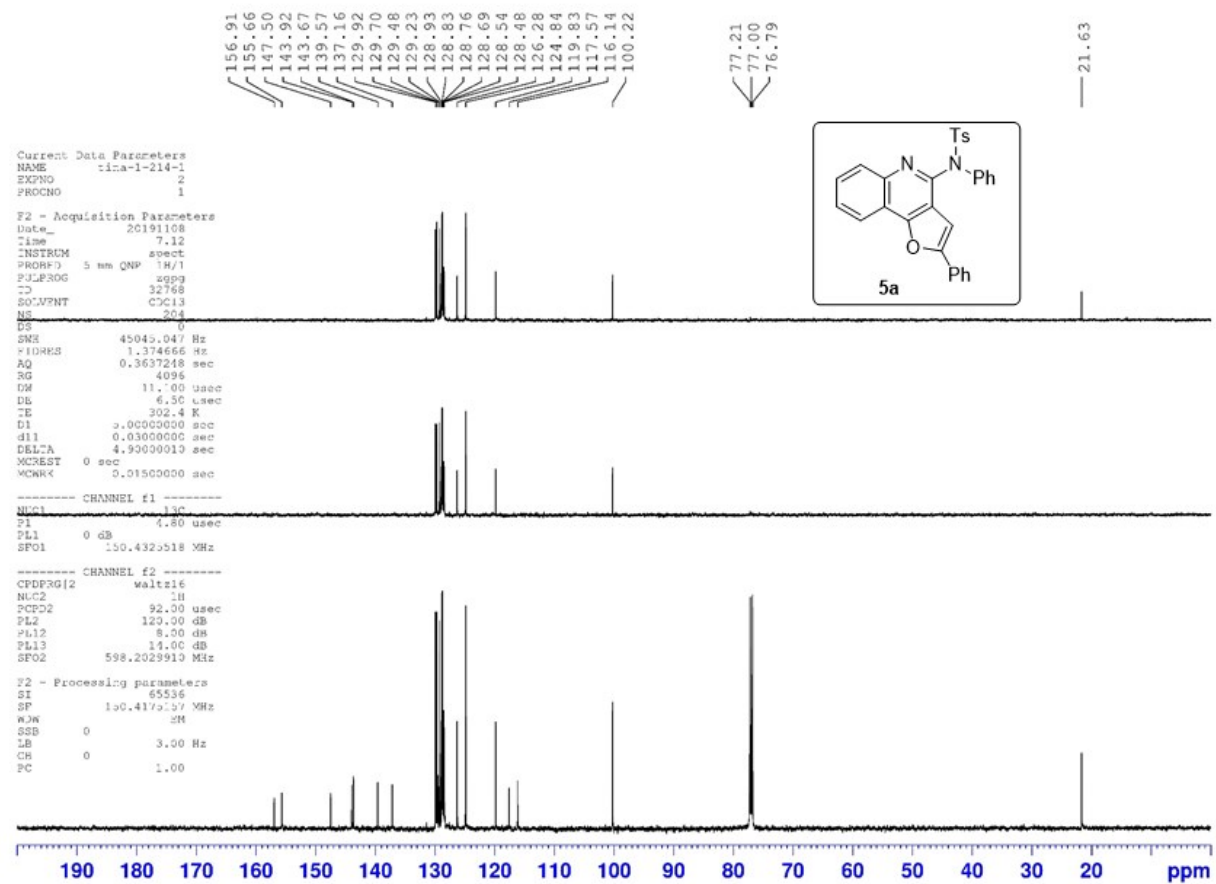

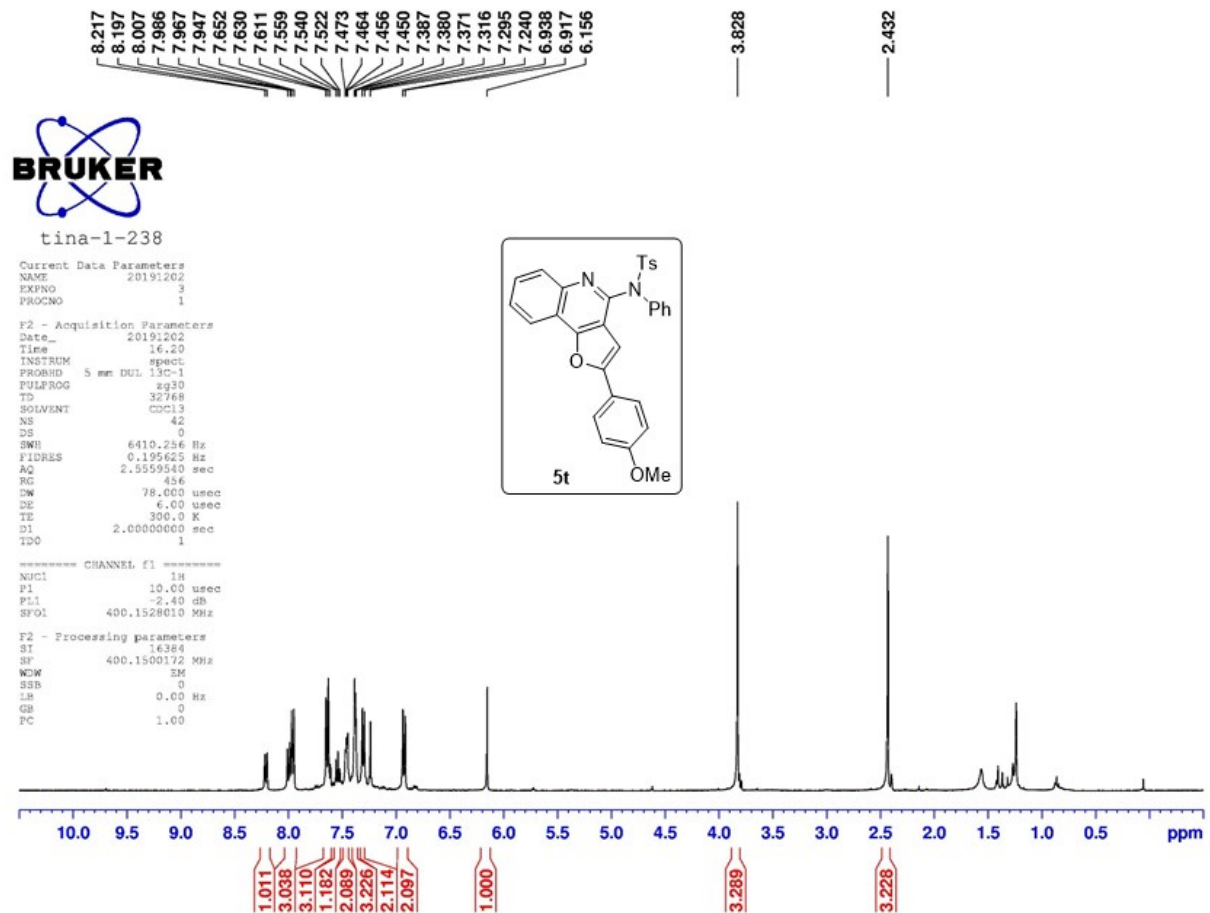

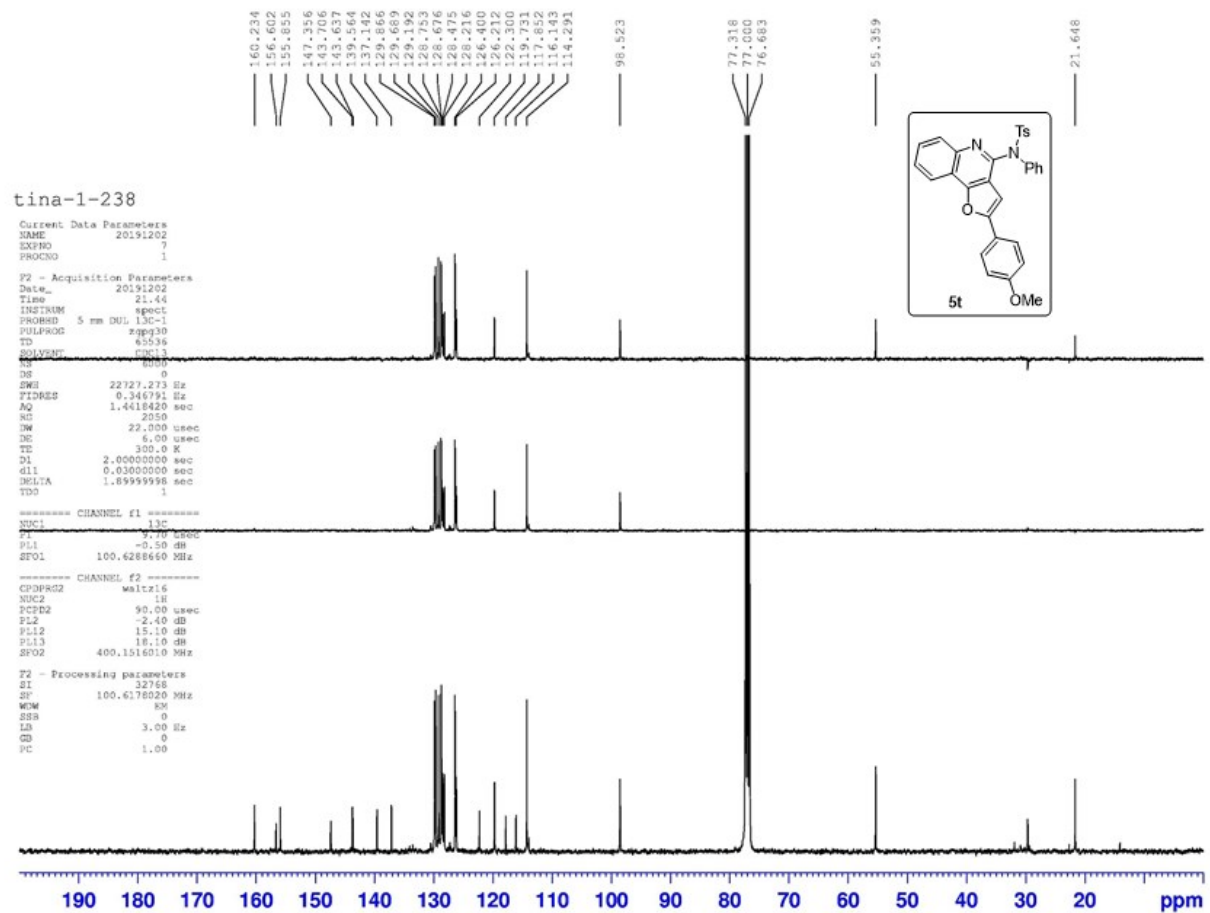

7.932  
7.664  
7.661  
7.647  
7.643  
7.640  
7.626  
7.622  
7.566  
7.564  
7.548  
7.546  
7.529  
7.526  
7.460  
7.457  
7.453  
7.450  
7.446  
7.444  
7.436  
7.397  
7.387  
7.383  
7.379  
7.377  
7.371  
7.326  
7.323  
7.313  
7.293  
7.240  
7.067  
7.058  
7.055  
7.045  
6.125

2.432

1.549

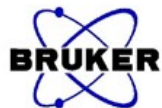

tina-2-2-down

Current Data Parameters  
NAME 20191206  
EXPNO 1  
PROCNO 1

F2 - Acquisition Parameters  
Date\_ 20191206  
Time 11.13  
INSTRUM spect  
PROBHD 5 mm DUL 13C-1  
PULPROG zg30  
TD 32768  
SOLVENT CDCl3  
NS 25  
DS 0  
SWH 6410.256 Hz  
FIDRES 0.195625 Hz  
AQ 2.5559540 sec  
RG 812  
SW 78.000 usec  
DE 6.00 usec  
TE 300.0 K  
D1 2.00000000 sec  
TD0 1

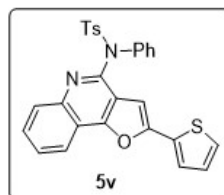

===== CHANNEL f1 =====  
NUC1 1H  
P1 10.00 usec  
PL1 -2.40 dB  
SFO1 400.1528010 MHz

F2 - Processing parameters  
SI 16384  
SF 400.1500172 MHz  
WDW EM  
SSB 0  
LB 0.00 Hz  
GB 0  
PC 1.00

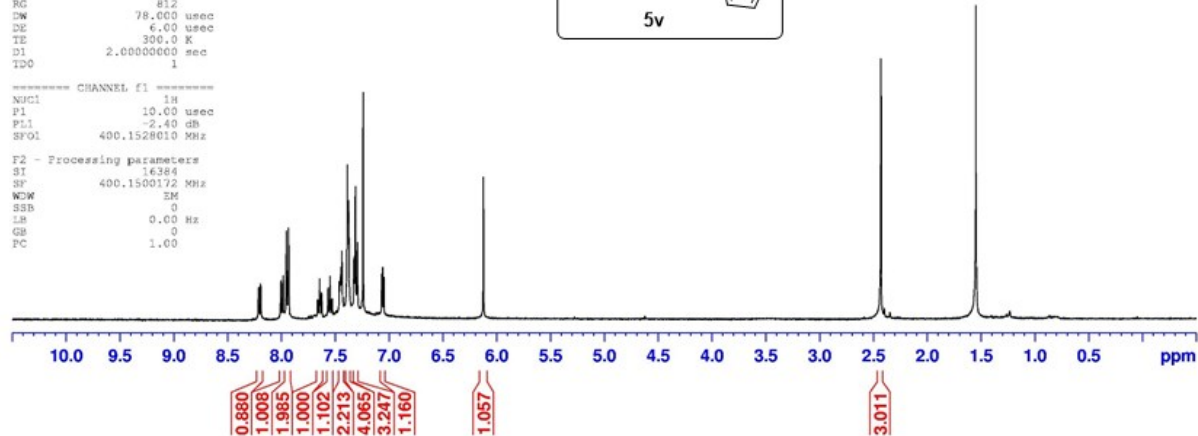



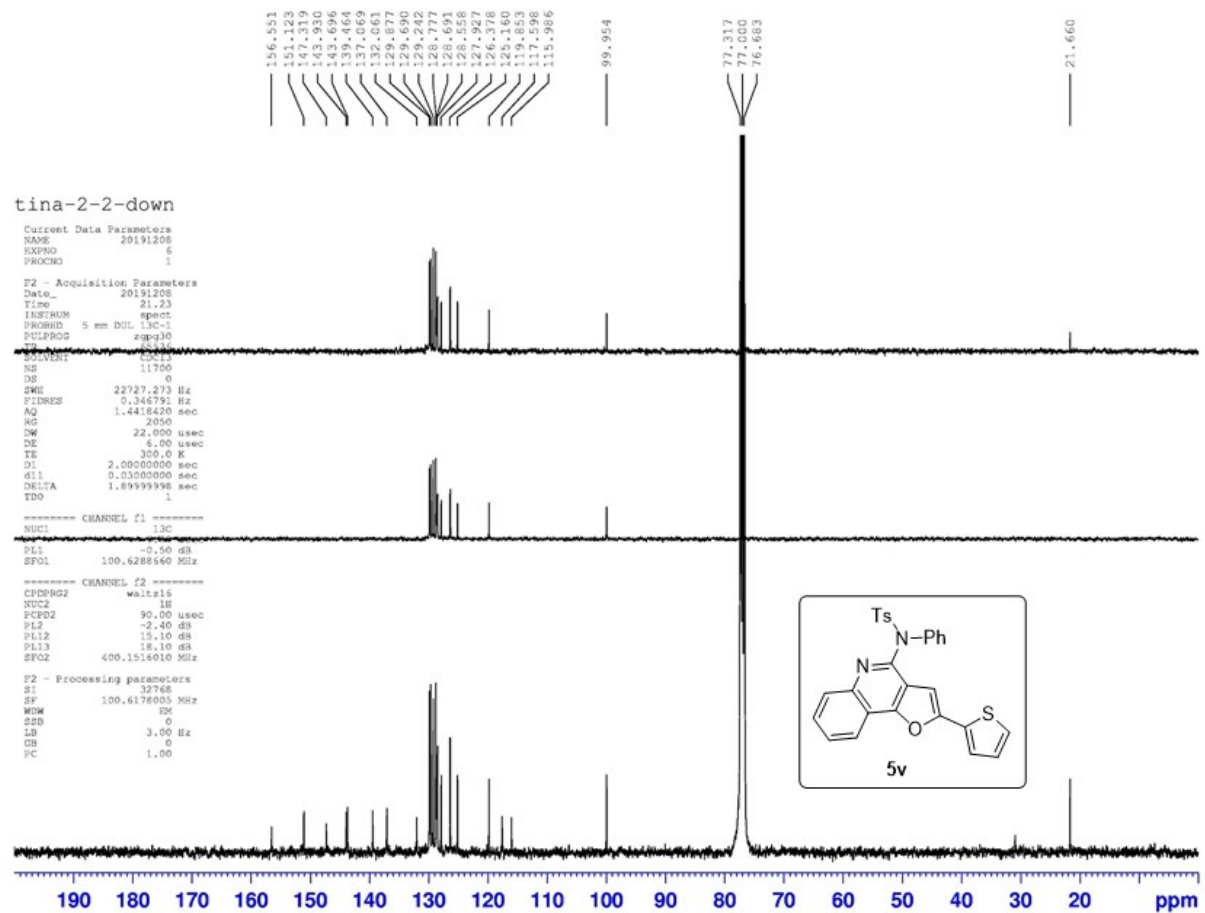



tina-2-113

Current Data Parameters  
NAME 20200408  
EXPNO 10  
PROCNO 1

F2 - Acquisition Parameters  
Date\_ 20200408  
Time 20.42  
INSTRUM spect  
PROBHD 5 mm DUL 13C-1  
PULPROG zg30  
TD 32768  
SOLVENT CDCl3  
NS 16  
DS 0  
SWH 6410.256 Hz  
FIDRES 0.195625 Hz  
AQ 2.5559540 sec  
RG 322  
DM 78.000 usec  
DE 6.00 usec  
TE 300.0 K  
D1 2.00000000 sec  
TDO 1

----- CHANNEL f1 -----  
NUC1 1H  
P1 10.00 usec  
PL1 -2.40 dB  
SFO1 400.1528010 MHz

F2 - Processing parameters  
SI 16384  
SF 400.1500175 MHz  
WOW EM  
SSB 0  
LB 0.00 Hz  
GB 0  
PC 1.00

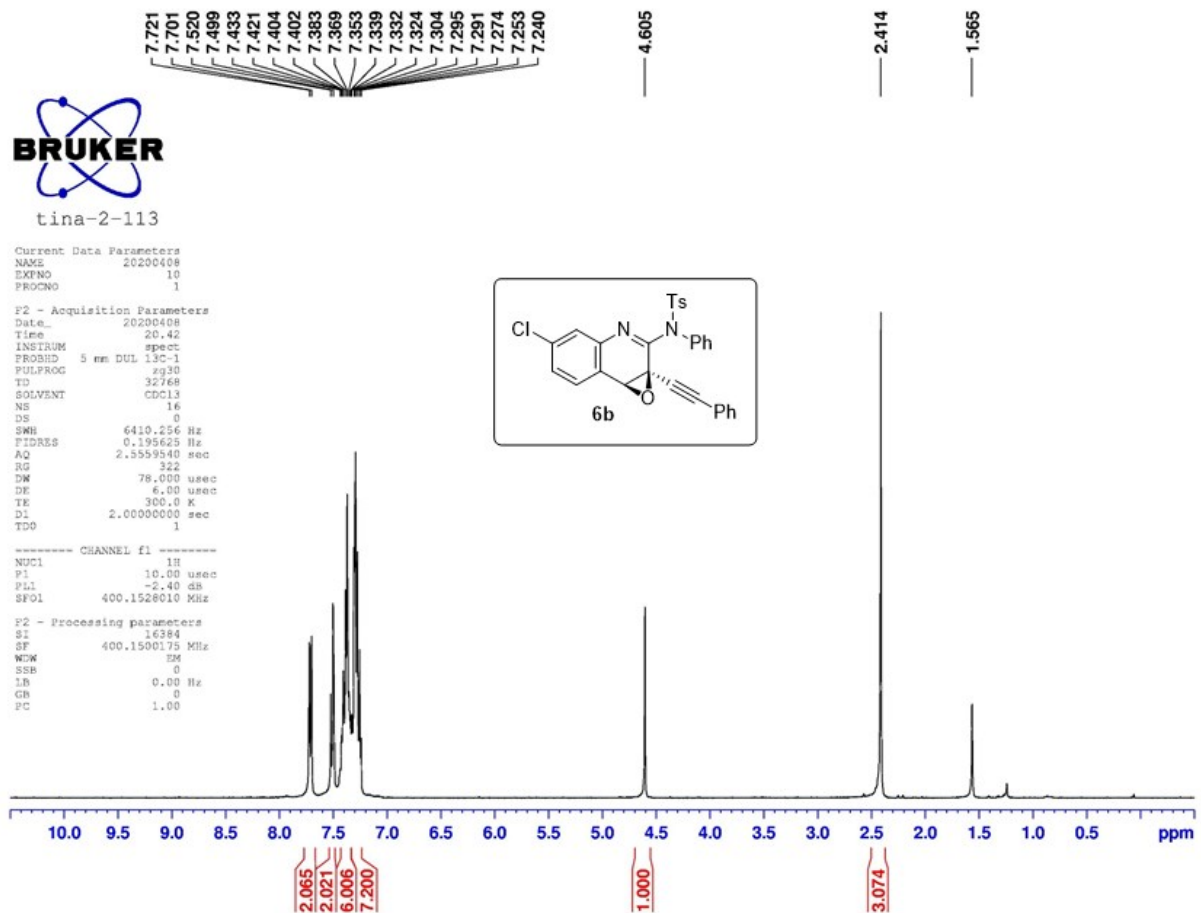

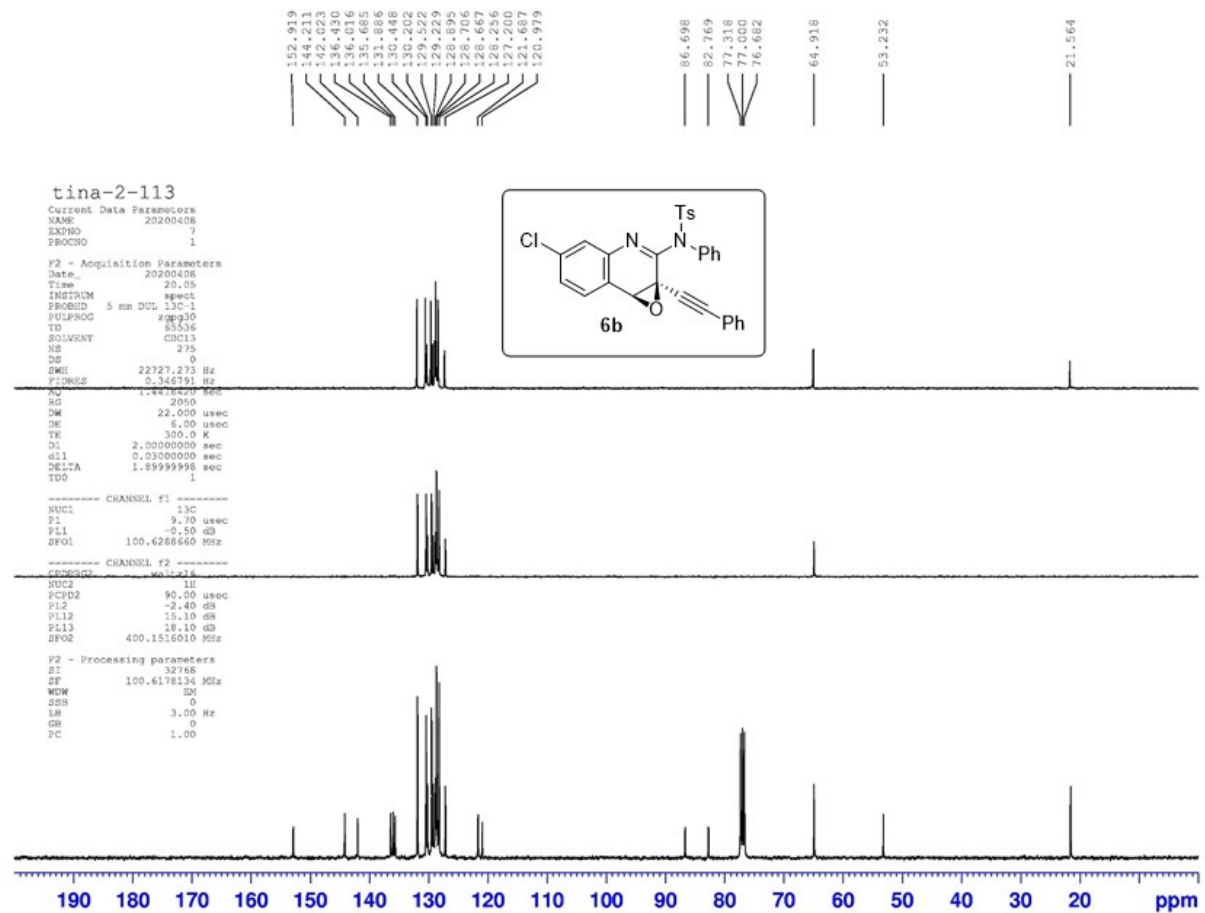



tina-2-104

Current Data Parameters  
NAME 20200327  
EXPNO 6  
PROCNO 1

F2 - Acquisition Parameters  
Date\_ 20200327  
Time 23.22  
INSTRUM spect  
PROBHD 5 mm DUL 13C-1  
PULPROG zg30  
TD 32768  
SOLVENT CDCl3  
NS 12  
DS 0  
SWH 6410.256 Hz  
FIDRES 0.195625 Hz  
AQ 2.5559540 sec  
RG 161  
DM 78.000 usec  
DE 6.00 usec  
TE 300.0 K  
D1 2.00000000 sec  
TDO 1

----- CHANNEL f1 -----  
NUC1 1H  
P1 10.00 usec  
PL1 -2.40 dB  
SFO1 400.1528010 MHz

F2 - Processing parameters  
SI 16384  
SF 400.1500177 MHz  
WDW EM  
SSB 0  
LB 0.00 Hz  
GB 0  
PC 1.00

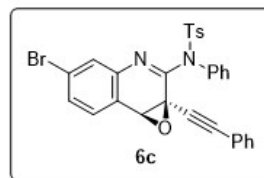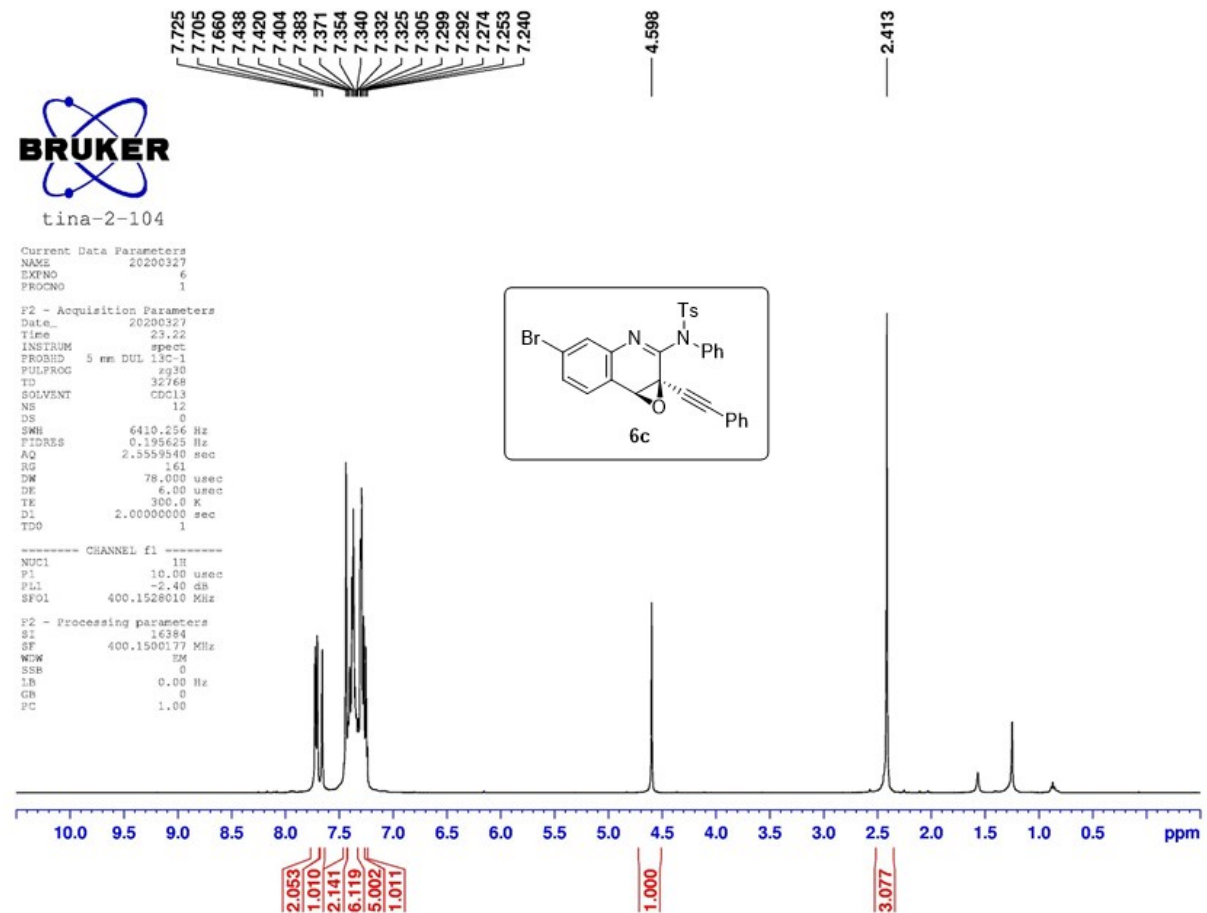

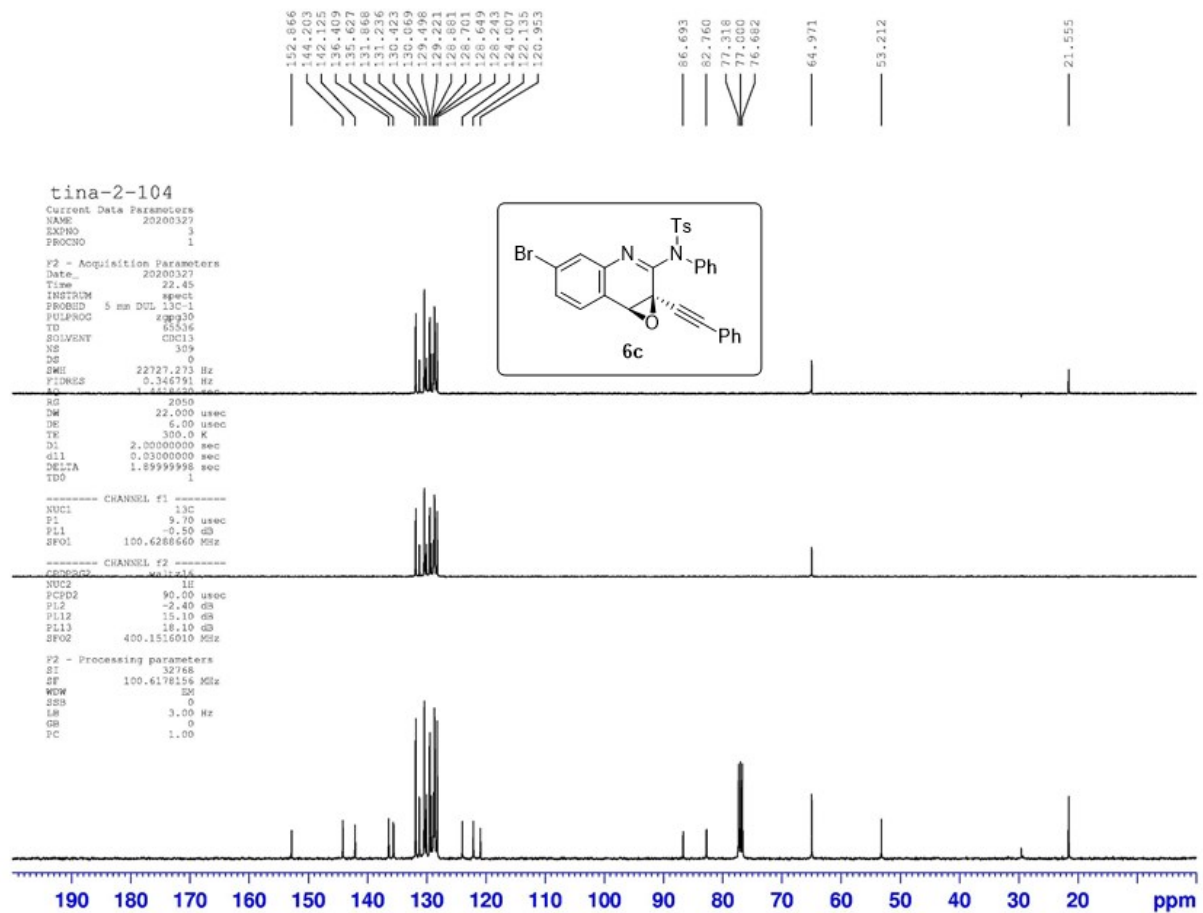

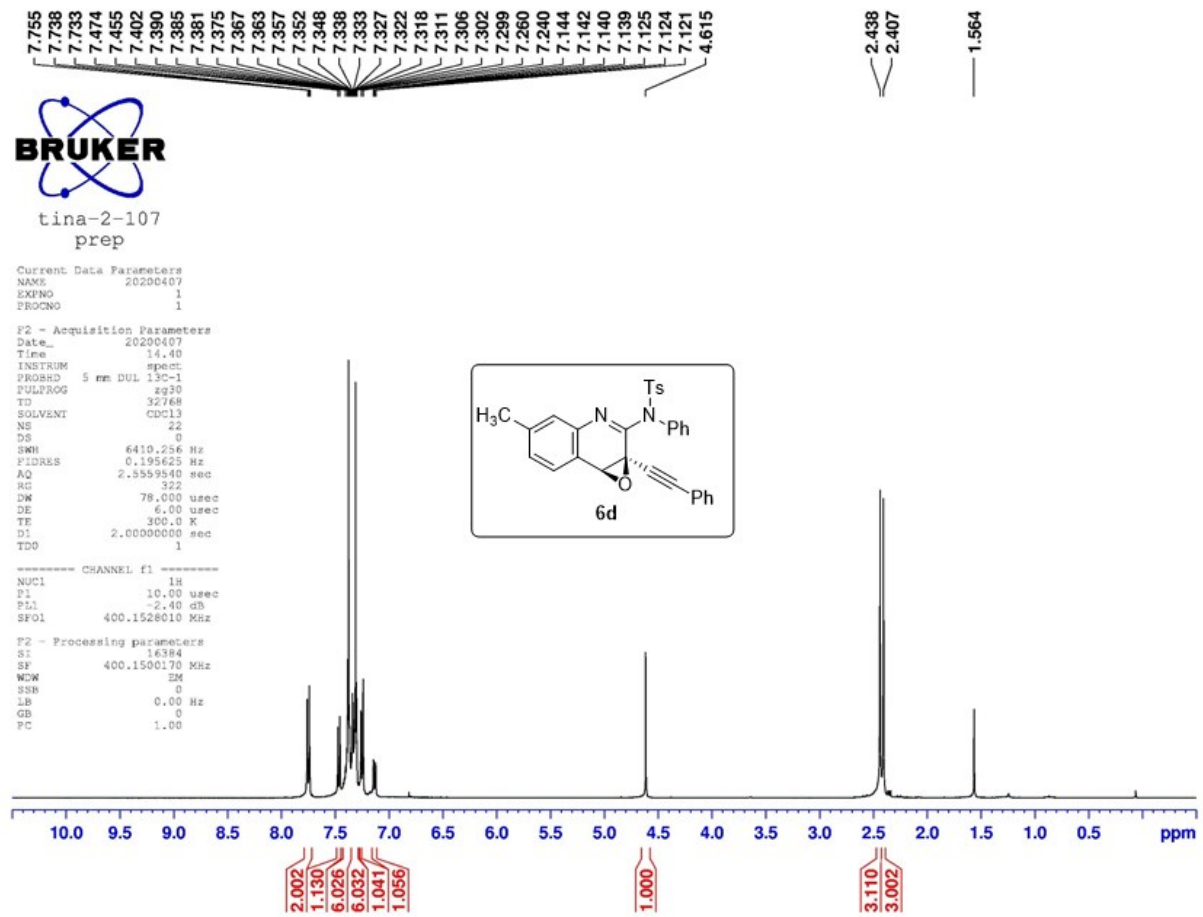

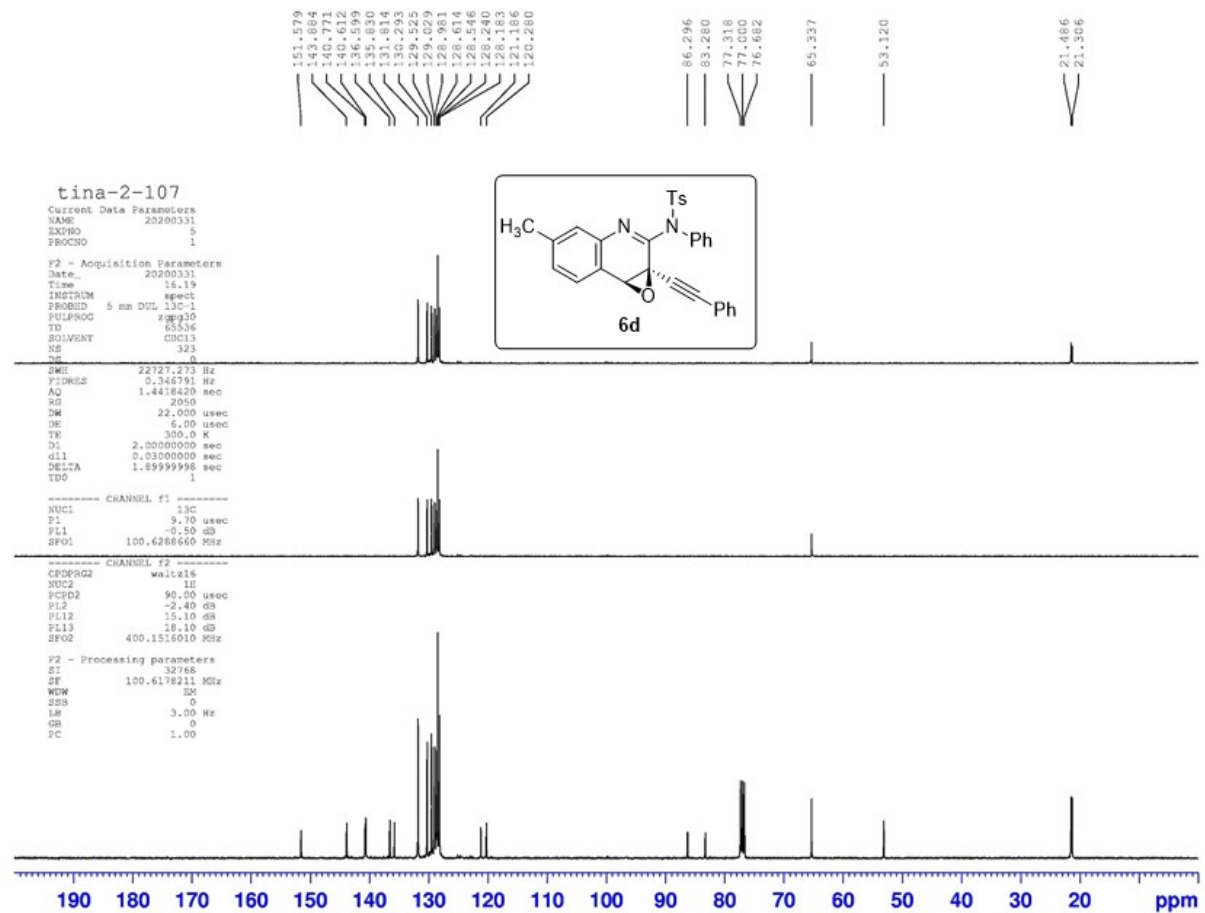

**BRUKER**  
tina-2-65

Current Data Parameters  
NAME 20200224  
EXPNO 10  
PROCNO 1

F2 - Acquisition Parameters  
Date\_ 20200225  
Time 0.06  
INSTRUM spect  
PROBHD 5 mm DUL 13C-1  
PULPROG zg30  
TD 32768  
SOLVENT CDCl3  
NS 12  
DS 0  
SWH 6410.256 Hz  
FIDRES 0.195625 Hz  
AQ 2.5559540 sec  
RG 322  
DM 78.000 usec  
DE 6.00 usec  
TE 300.0 K  
D1 2.00000000 sec  
TDO 1

----- CHANNEL f1 -----  
NUC1 1H  
P1 10.00 usec  
PL1 -2.40 dB  
SFO1 400.1528010 MHz

F2 - Processing parameters  
SI 16384  
SF 400.1500170 MHz  
WOW EM  
SSB 0  
LB 0.00 Hz  
GB 0  
PC 1.00

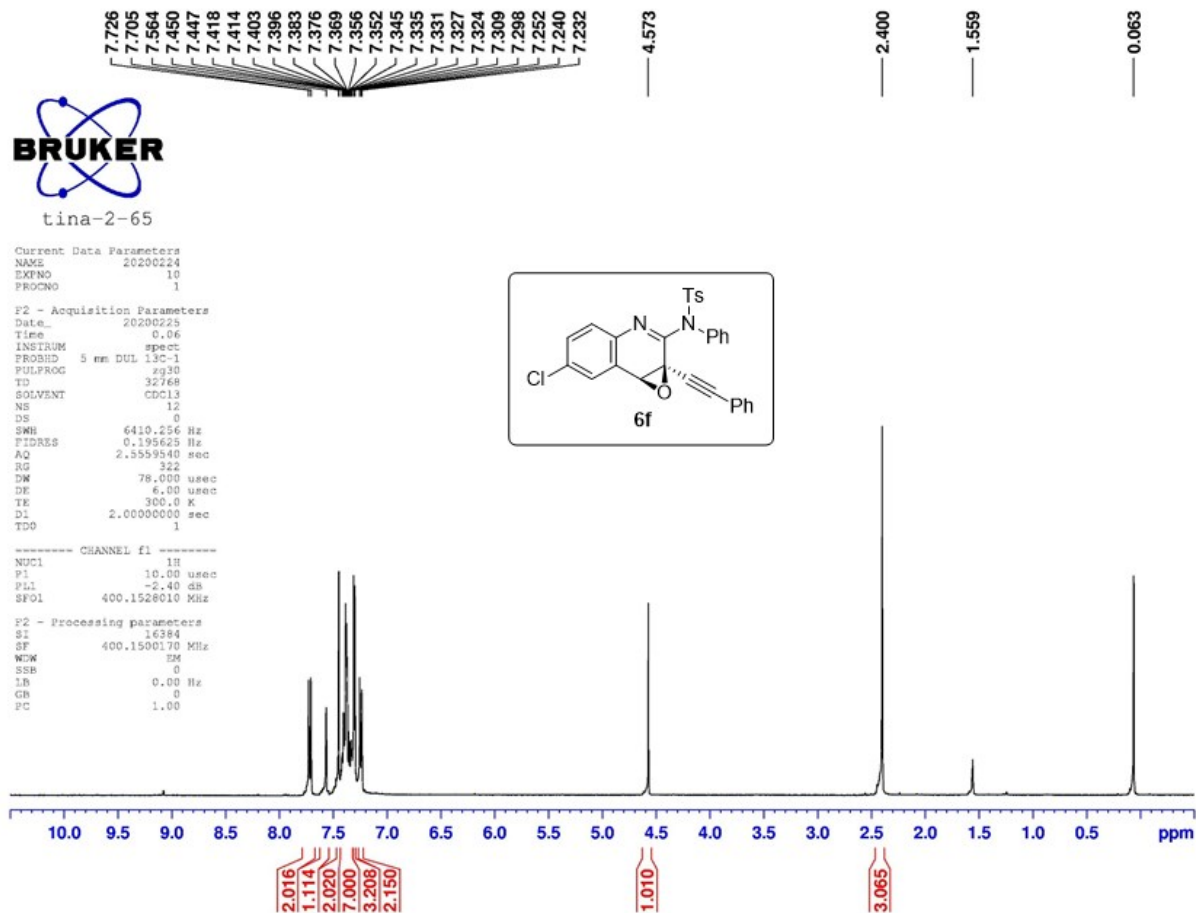



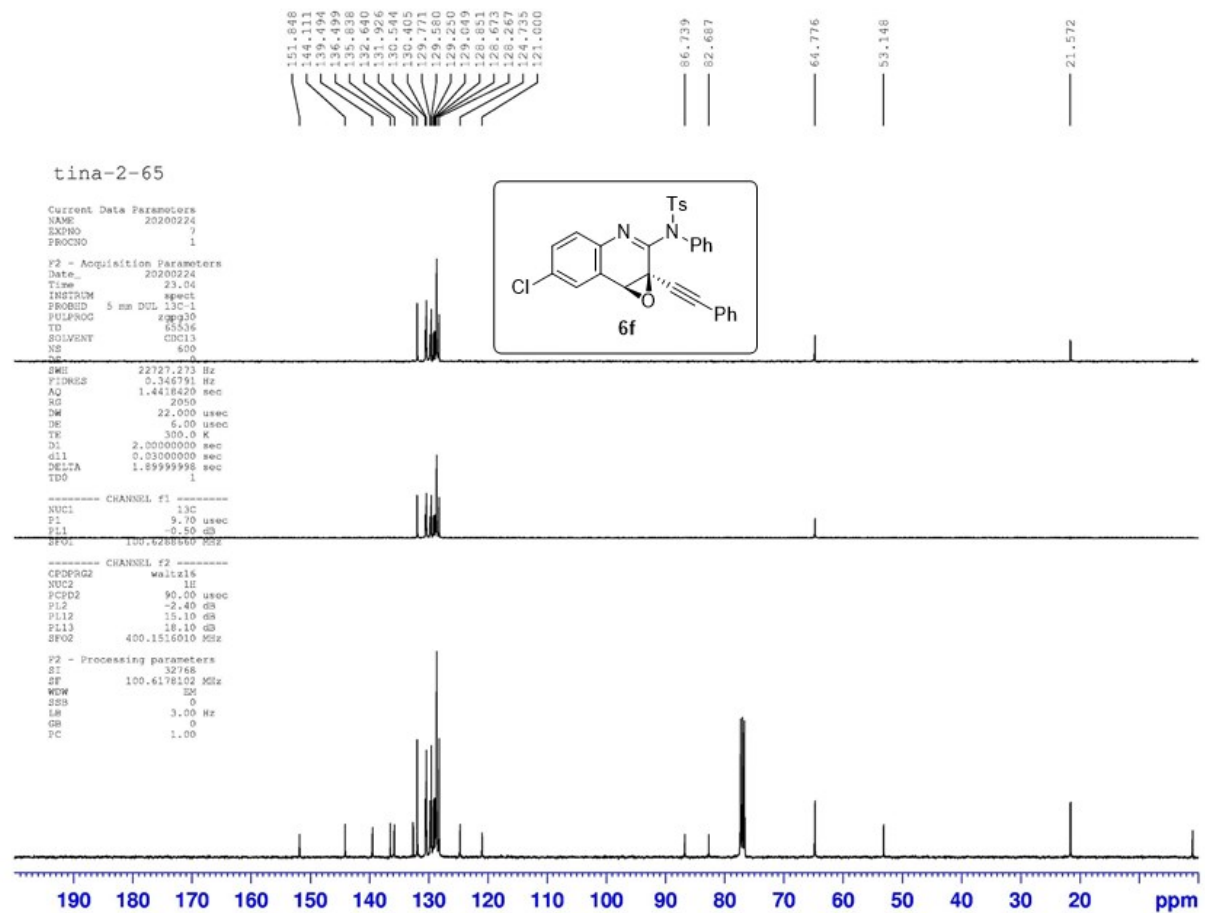



tina-2-71

Current Data Parameters  
NAME 20200302  
EXPNO 3  
PROCNO 1

F2 - Acquisition Parameters  
Date\_ 20200302  
Time 21.33  
INSTRUM spect  
PROBHD 5 mm DUL 13C-1  
PULPROG zg30  
TD 32768  
SOLVENT CDCl3  
NS 11  
DS 0  
SWH 6410.256 Hz  
FIDRES 0.195625 Hz  
AQ 2.5559540 sec  
RG 90.5  
DM 78.000 usec  
DE 6.00 usec  
TE 300.0 K  
D1 2.00000000 sec  
TDO 1

----- CHANNEL f1 -----  
NUC1 1H  
P1 10.00 usec  
PL1 -2.40 dB  
SFO1 400.1528010 MHz

F2 - Processing parameters  
SI 16384  
SF 400.1500169 MHz  
WOW EM  
SSB 0  
LB 0.00 Hz  
GB 0  
PC 1.00

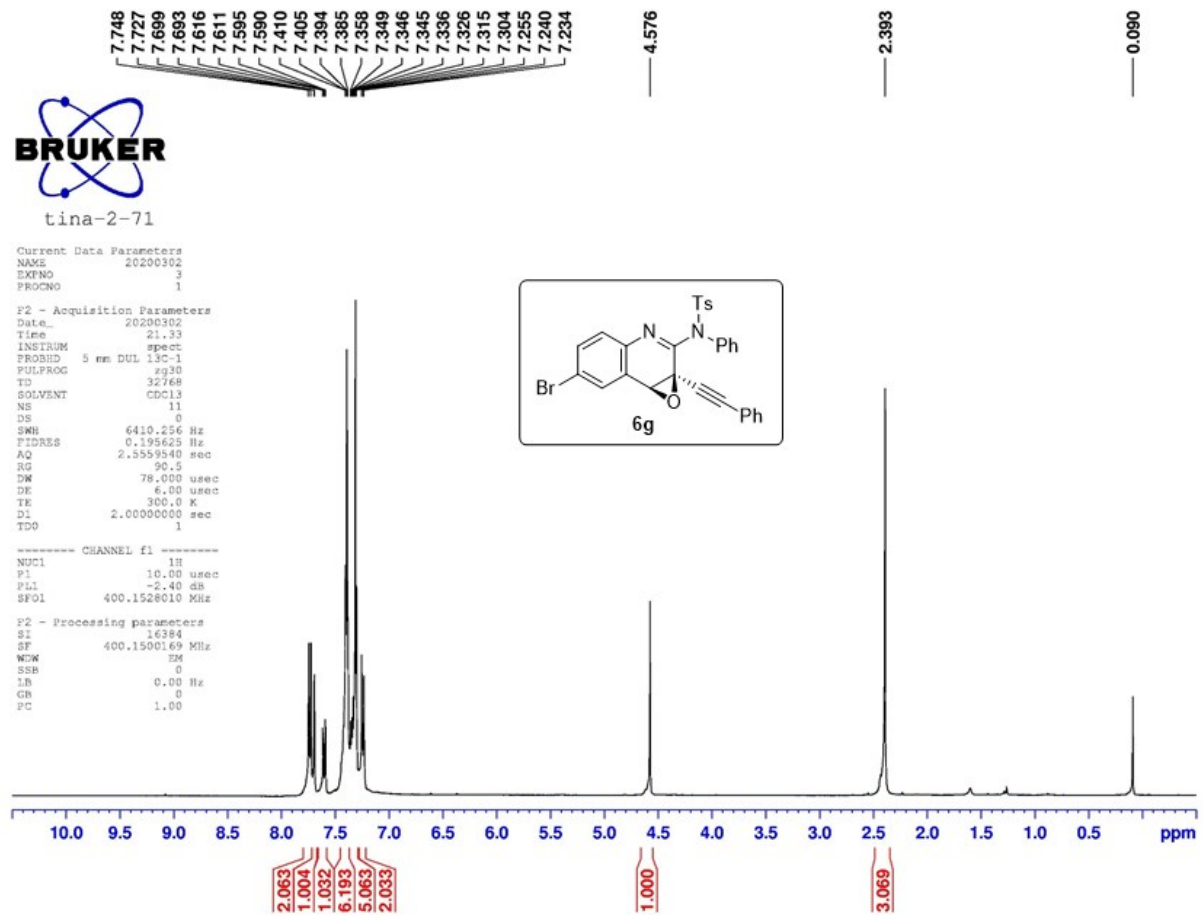

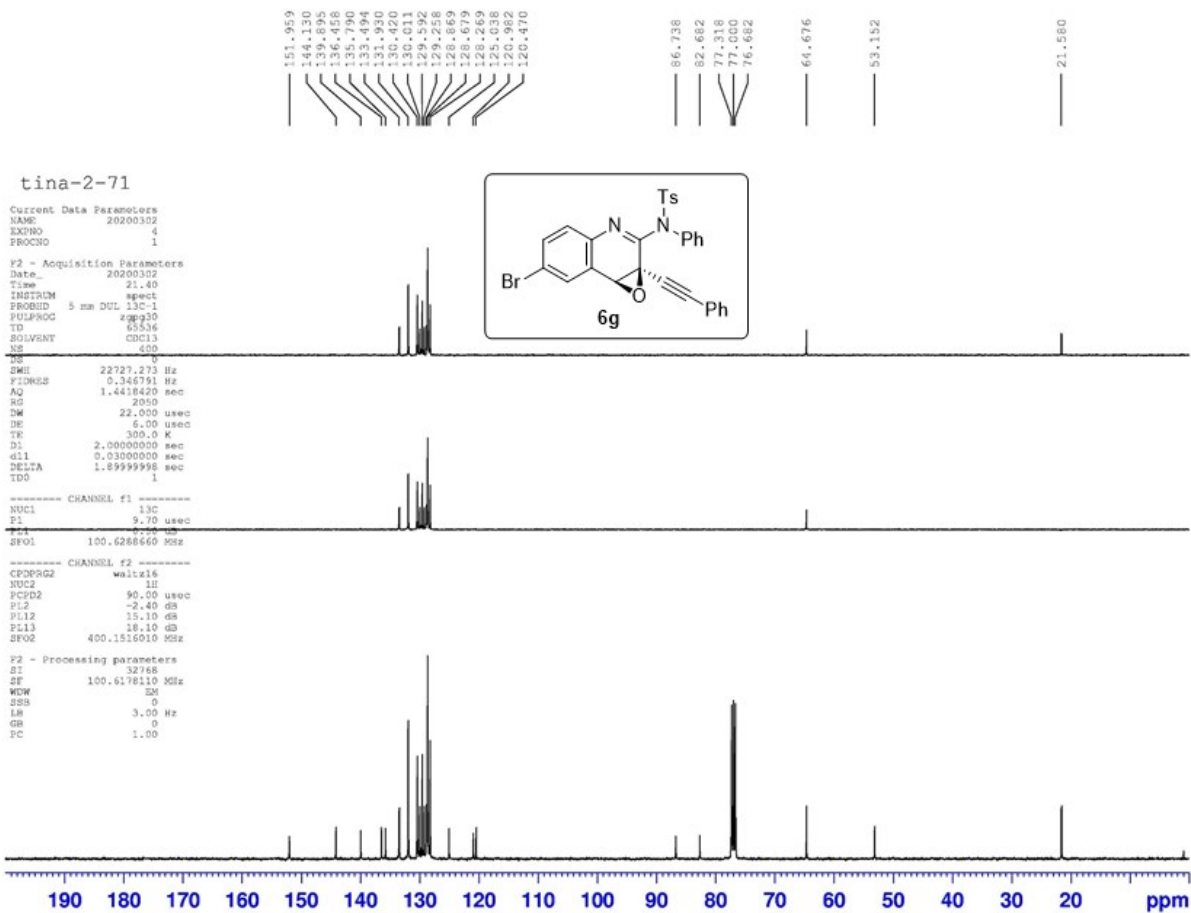



tina-2-72

Current Data Parameters  
NAME 20200304  
EXPNO 9  
PROCNO 1

F2 - Acquisition Parameters  
Date\_ 20200304  
Time 23.45  
INSTRUM spect  
PROBHD 5 mm DUL 13C-1  
PULPROG zg30  
TD 32768  
SOLVENT CDCl3  
NS 14  
DS 0  
SWH 6410.256 Hz  
FIDRES 0.195625 Hz  
AQ 2.5559540 sec  
RG 114  
DM 78.000 usec  
DE 6.00 usec  
TE 300.0 K  
D1 2.00000000 sec  
TDO 1

----- CHANNEL f1 -----  
NUC1 1H  
P1 10.00 usec  
PL1 -2.40 dB  
SFO1 400.1528010 MHz  
  
F2 - Processing parameters  
SI 16384  
SF 400.1500168 MHz  
WOW EM  
SSB 0  
LB 0.00 Hz  
GB 0  
PC 1.00

7.758  
7.738  
7.431  
7.411  
7.388  
7.354  
7.346  
7.344  
7.335  
7.323  
7.309  
7.287  
7.249  
7.229

4.596

2.405  
2.398

1.592

0.082

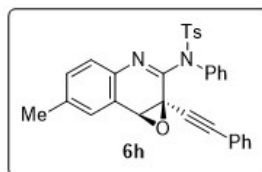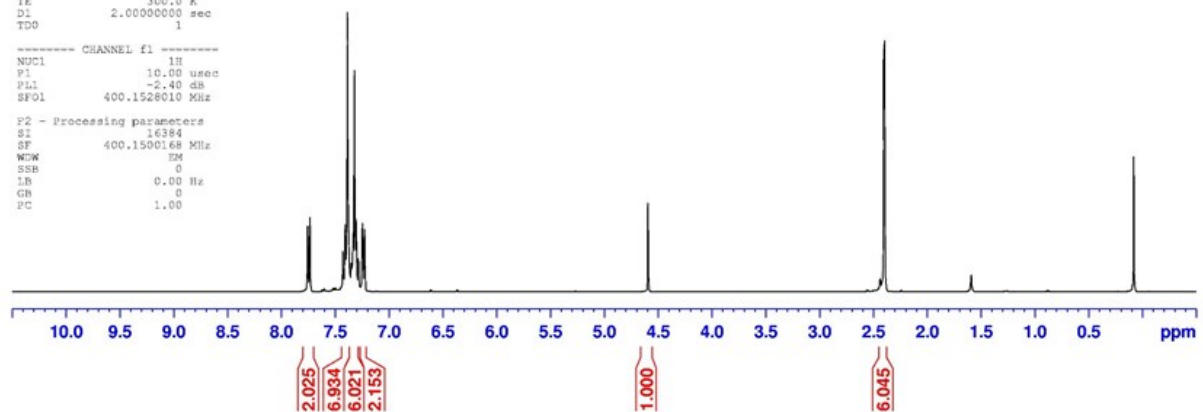

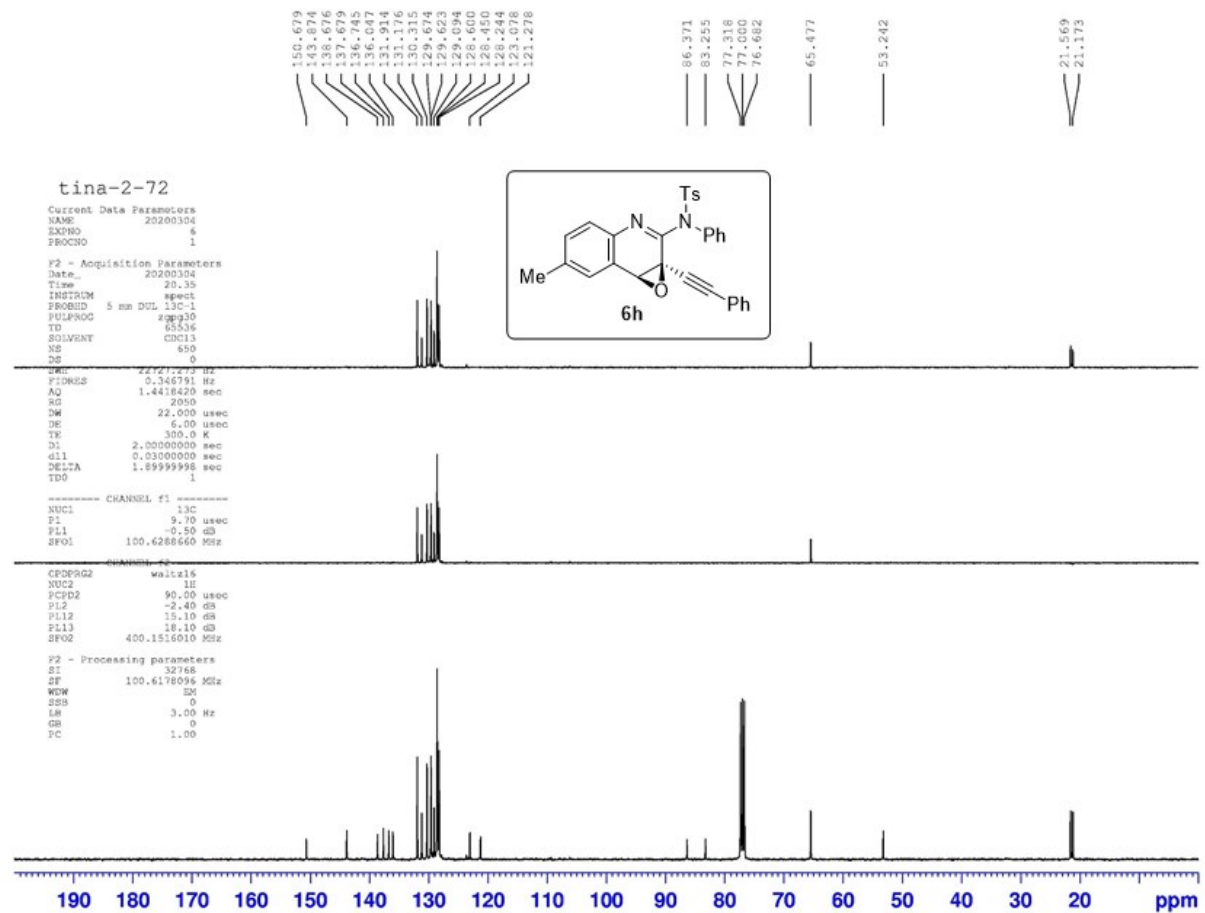



tina-2-65-2

Current Data Parameters  
NAME 20200226  
EXPNO 2  
PROCNO 1

F2 - Acquisition Parameters  
Date\_ 20200226  
Time 12.58  
INSTRUM spect  
PROBHD 5 mm DUL 13C-1  
PULPROG zg30  
TD 32768  
SOLVENT CDCl3  
NS 15  
DS 0  
SWH 6410.256 Hz  
FIDRES 0.195625 Hz  
AQ 2.5559540 sec  
RG 575  
DM 78.000 usec  
DE 6.00 usec  
TE 300.0 K  
D1 2.00000000 sec  
TDO 1

----- CHANNEL f1 -----  
NUC1 1H  
P1 10.00 usec  
PL1 -2.40 dB  
SFO1 400.1528010 MHz

F2 - Processing parameters  
SI 16384  
SF 400.1500172 MHz  
WDW EM  
SSB 0  
LB 0.00 Hz  
GB 0  
PC 1.00

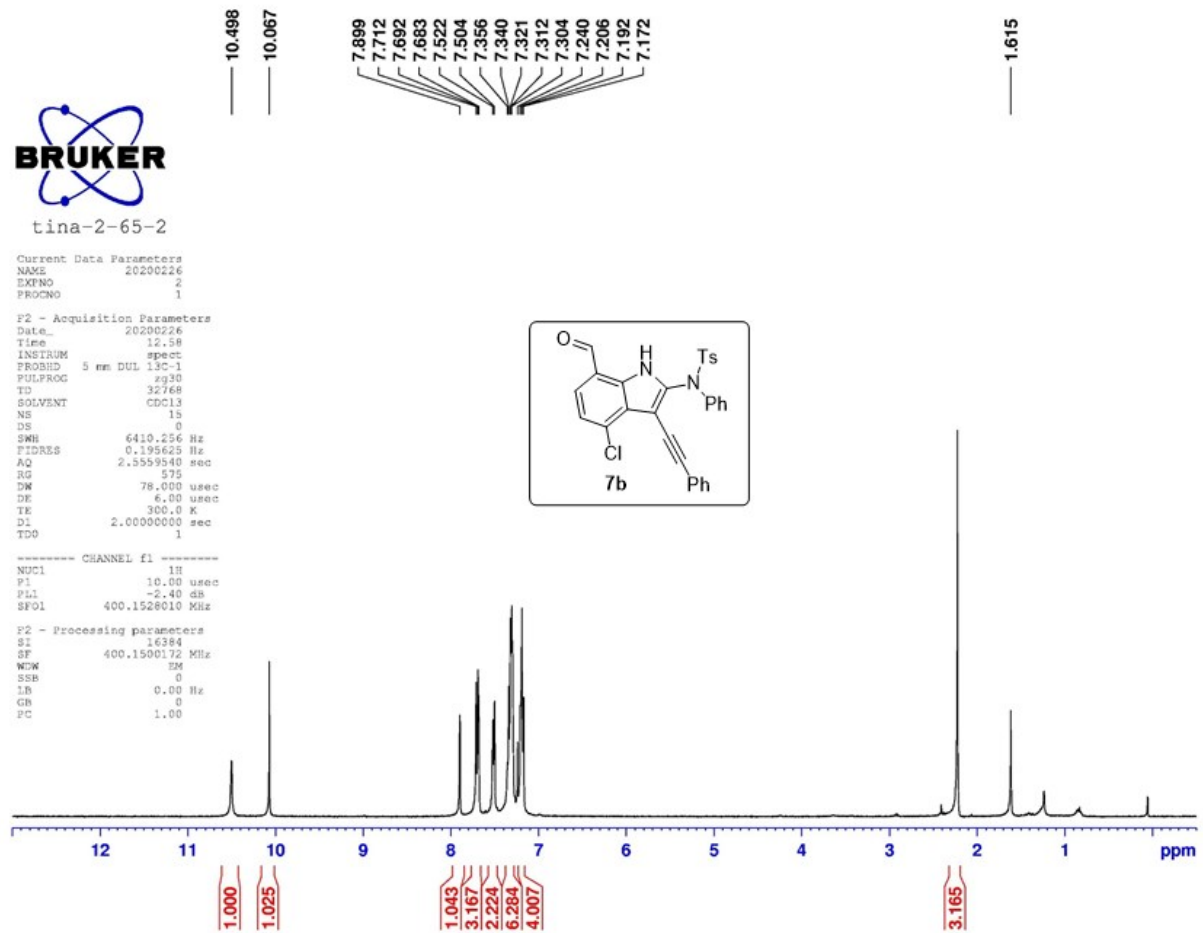

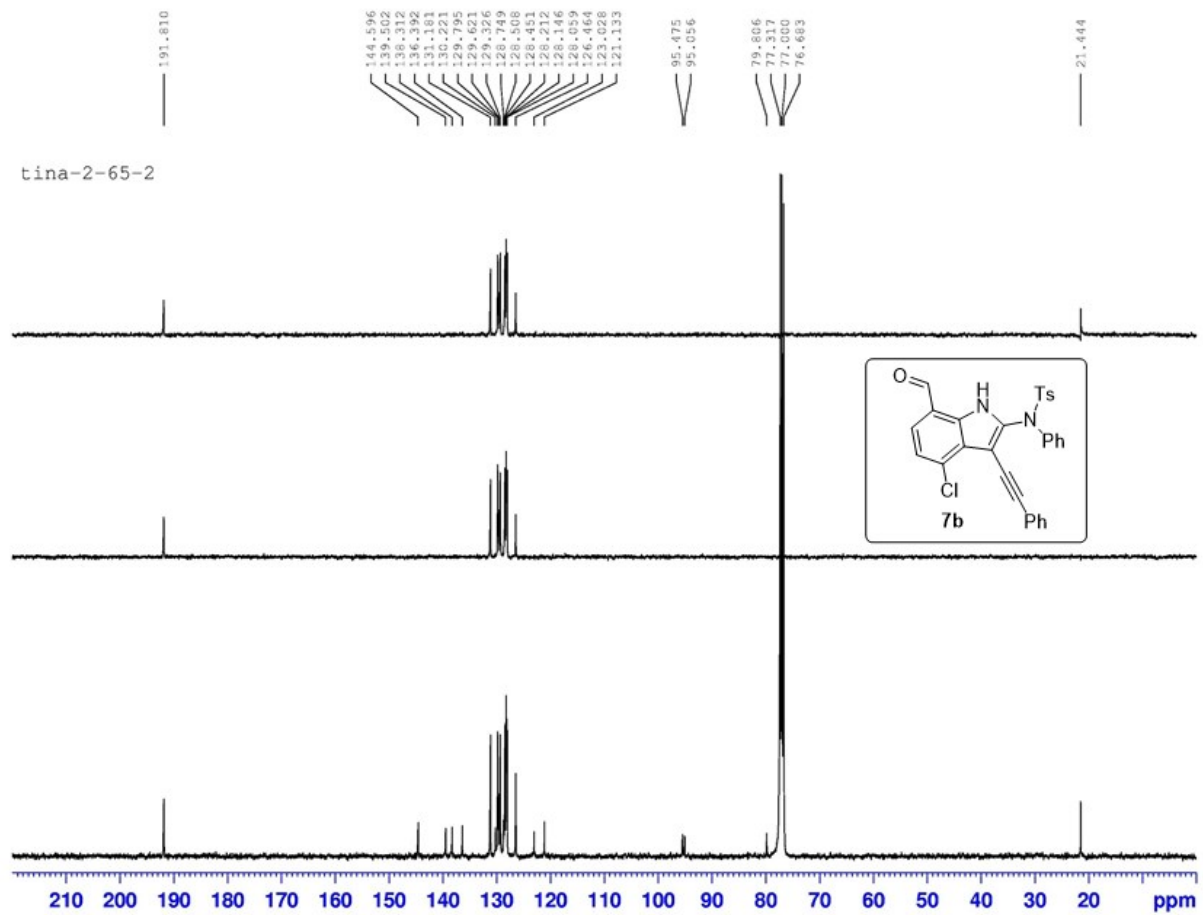



tina-2-75

Current Data Parameters  
NAME 20200304  
EXPNO 2  
PROCNO 1

F2 - Acquisition Parameters  
Date\_ 20200304  
Time 13.30  
INSTRUM spect  
PROBHD 5 mm DUL 13C-1  
PULPROG zg30  
TD 32768  
SOLVENT CDCl3  
NS 14  
DS 0  
SWH 6410.256 Hz  
FIDRES 0.195625 Hz  
AQ 2.5559340 sec  
RG 456  
DN 78.000 usec  
DE 6.00 usec  
TE 300.0 K  
D1 2.00000000 sec  
TD0 1

----- CHANNEL f1 -----  
NUC1 1H  
P1 10.00 usec  
PL1 -2.40 dB  
SFO1 400.1526010 MHz

F2 - Processing parameters  
SI 16384  
SF 400.1500174 MHz  
WDW 3M  
SSB 0  
LB 0.00 Hz  
GB 0  
PC 1.00

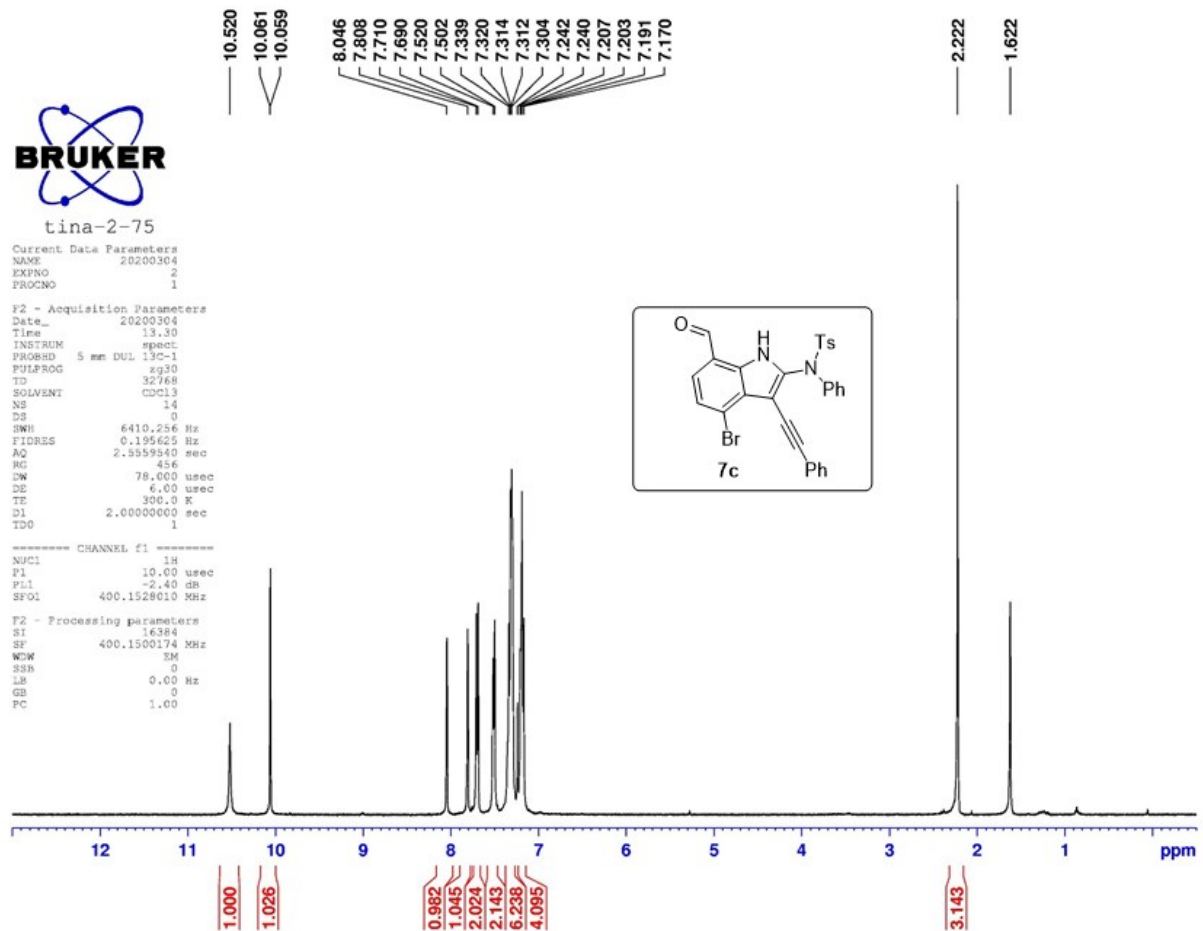



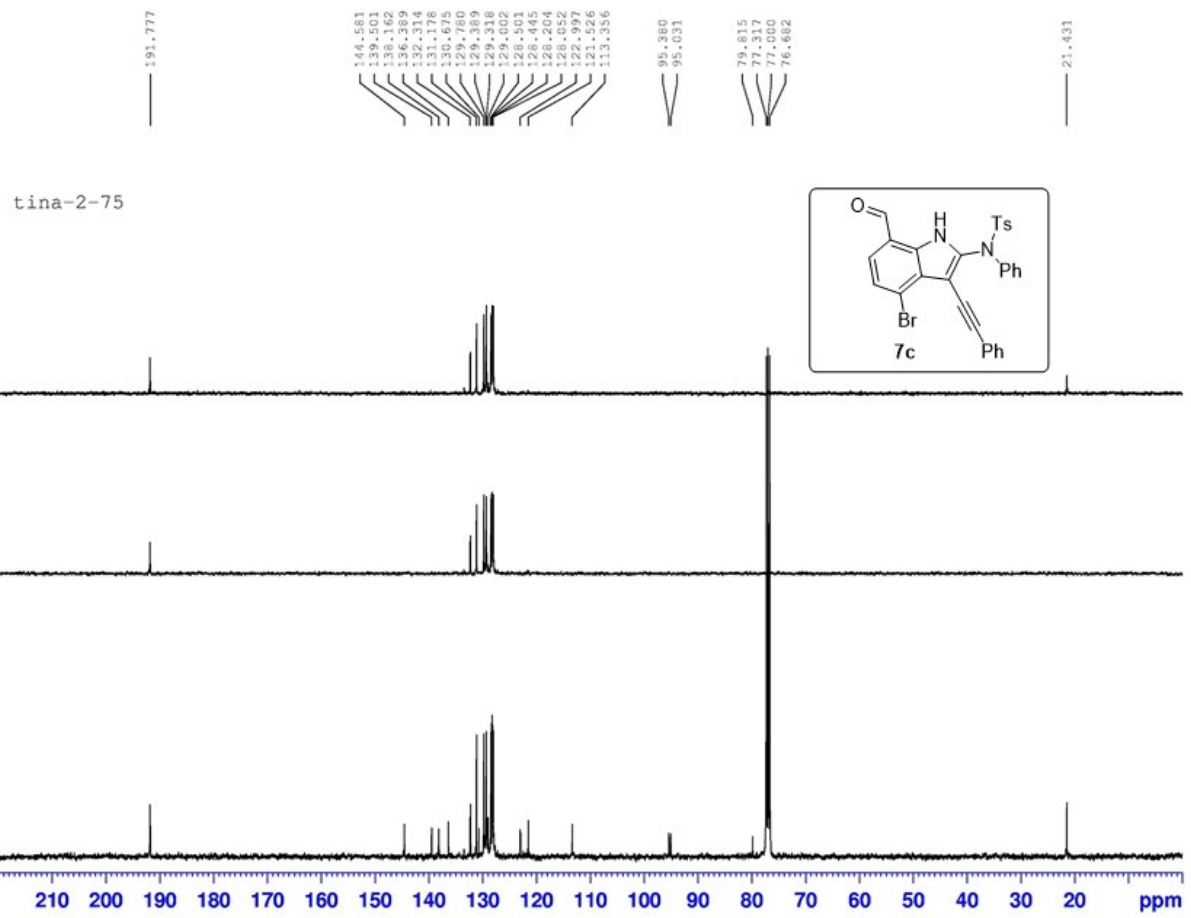

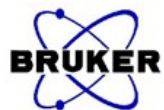

tina-2-73

Current Data Parameters  
NAME 20200306  
EXPNO 6  
PROCNO 1

F2 - Acquisition Parameters  
Date\_ 20200306  
Time 15:27  
INSTRUM spect  
PROBHD 5 mm DUL 13C-1  
PULPROG zg30  
TD 32768  
SOLVENT CDCl3  
NS 33  
DS 0  
SWH 6410.256 Hz  
FIDRES 0.195625 Hz  
AQ 2.5559540 sec  
RG 812  
DM 78.000 usec  
DE 6.00 usec  
TE 300.0 K  
D1 2.00000000 sec  
TDO 1

----- CHANNEL f1 -----  
NUC1 1H  
P1 10.00 usec  
PL1 -2.40 dB  
SFO1 400.1528010 MHz

F2 - Processing parameters  
SI 16384  
SF 400.1500174 MHz  
WDW EM  
SSB 0  
LB 0.00 Hz  
GB 0  
PC 1.00

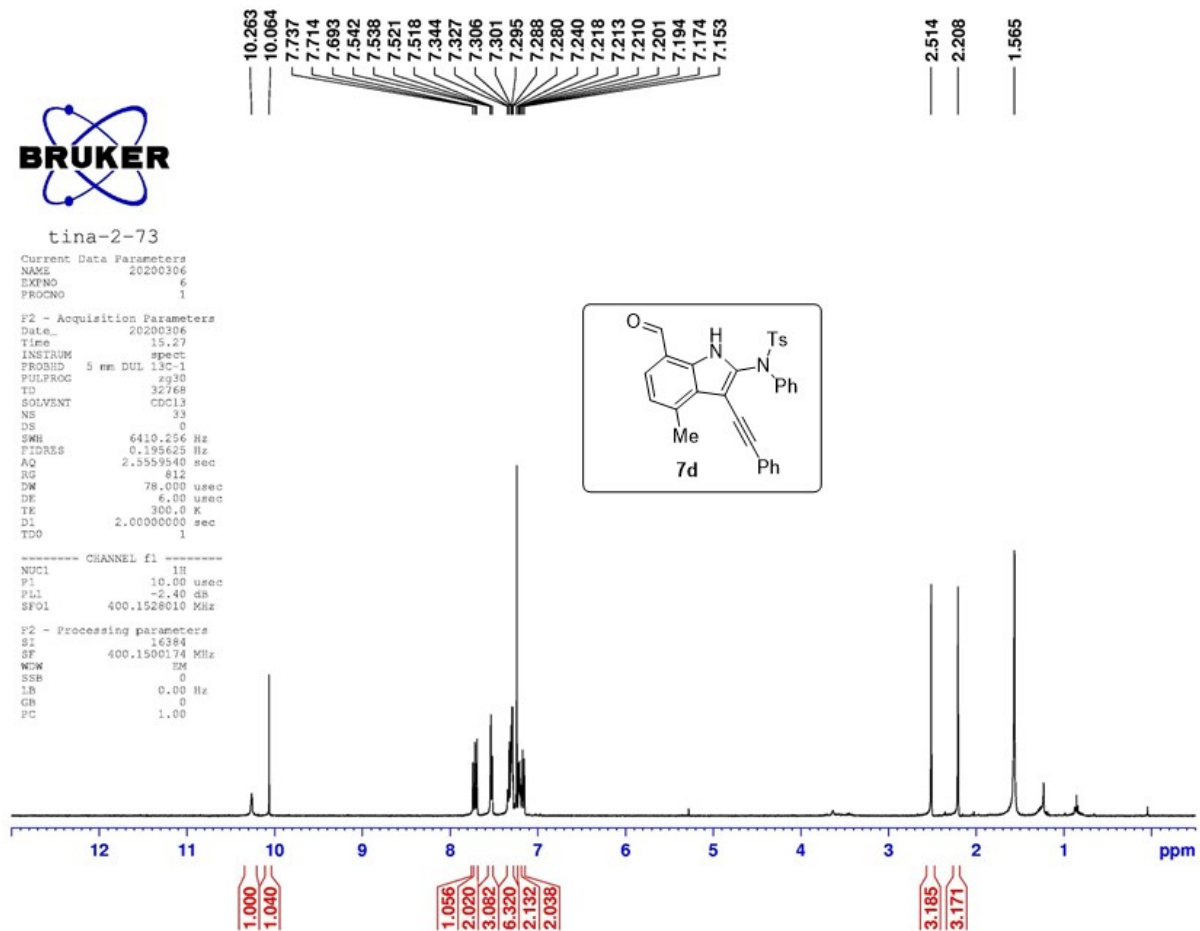

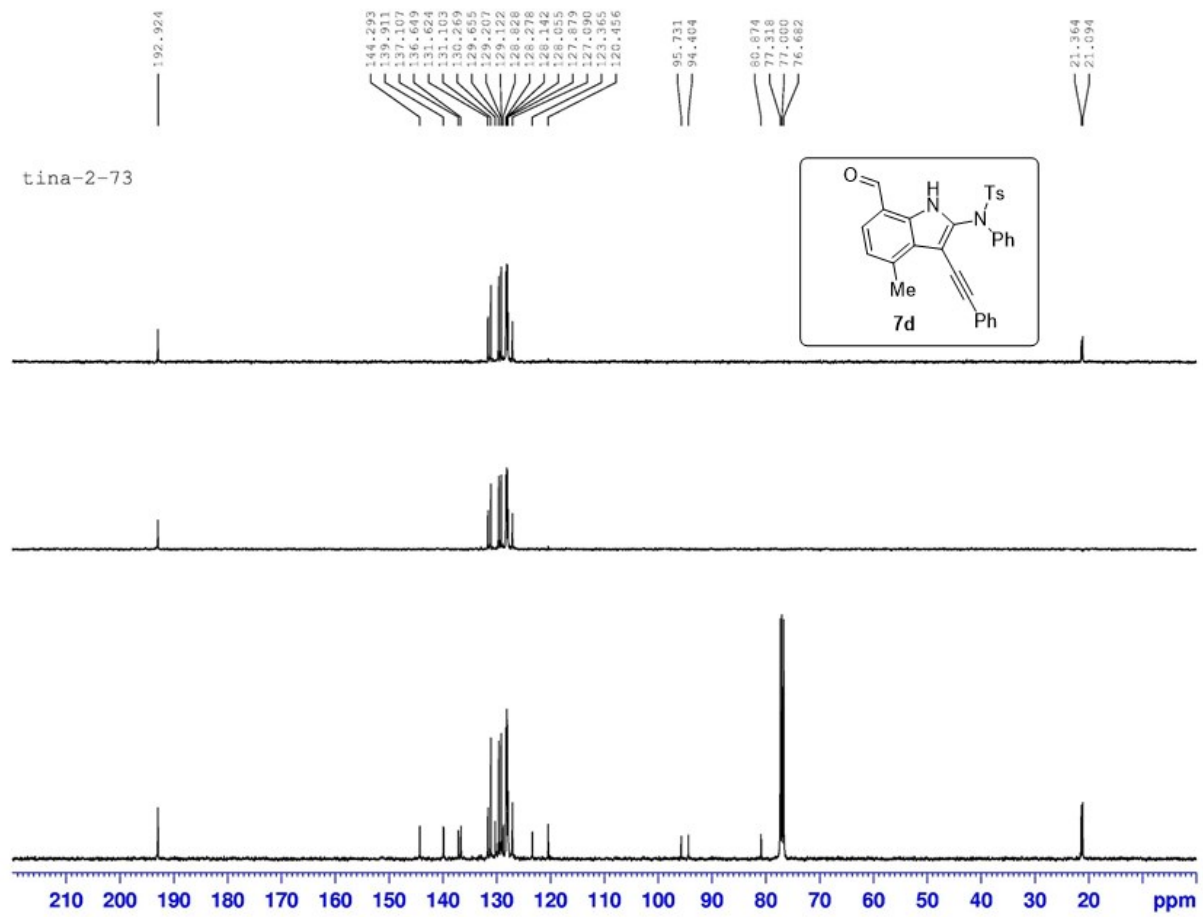



tina-2-77-2

Current Data Parameters  
NAME 20200310  
EXPNO 7  
PROCNO 1

F2 - Acquisition Parameters  
Date\_ 20200310  
Time 21.03  
INSTRUM spect  
PROBHD 5 mm DUL 13C-1  
PULPROG zg30  
TD 32768  
SOLVENT CDCl3  
NS 10  
DS 0  
SWH 6410.256 Hz  
FIDRES 0.195625 Hz  
AQ 2.5559540 sec  
RG 161  
DM 78.000 usec  
DE 6.00 usec  
TE 300.0 K  
D1 2.00000000 sec  
TDO 1

----- CHANNEL f1 -----  
NUC1 1H  
P1 10.00 usec  
PL1 -2.40 dB  
SFO1 400.1528010 MHz

F2 - Processing parameters  
SI 16384  
SF 400.1500168 MHz  
WDW EM  
SSB 0  
LB 0.00 Hz  
GB 0  
PC 1.00

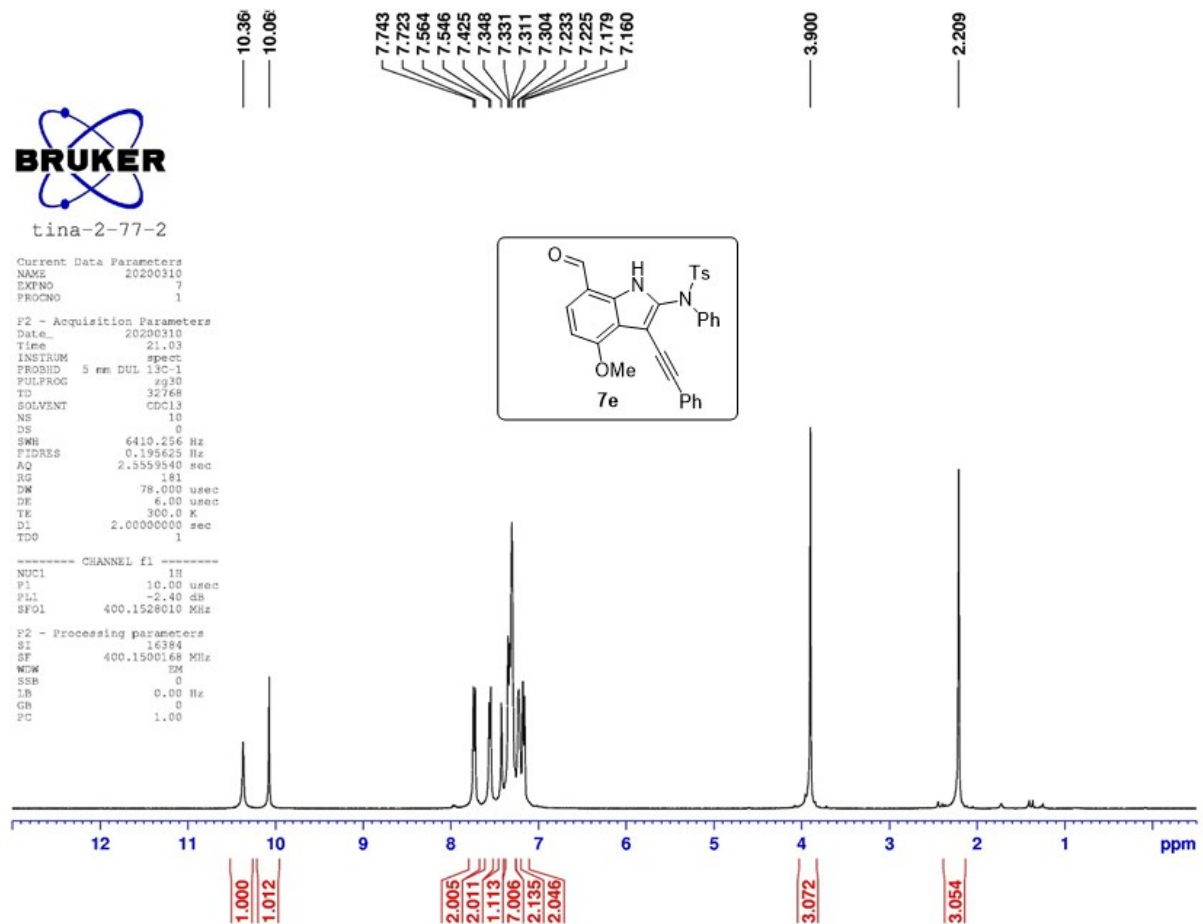

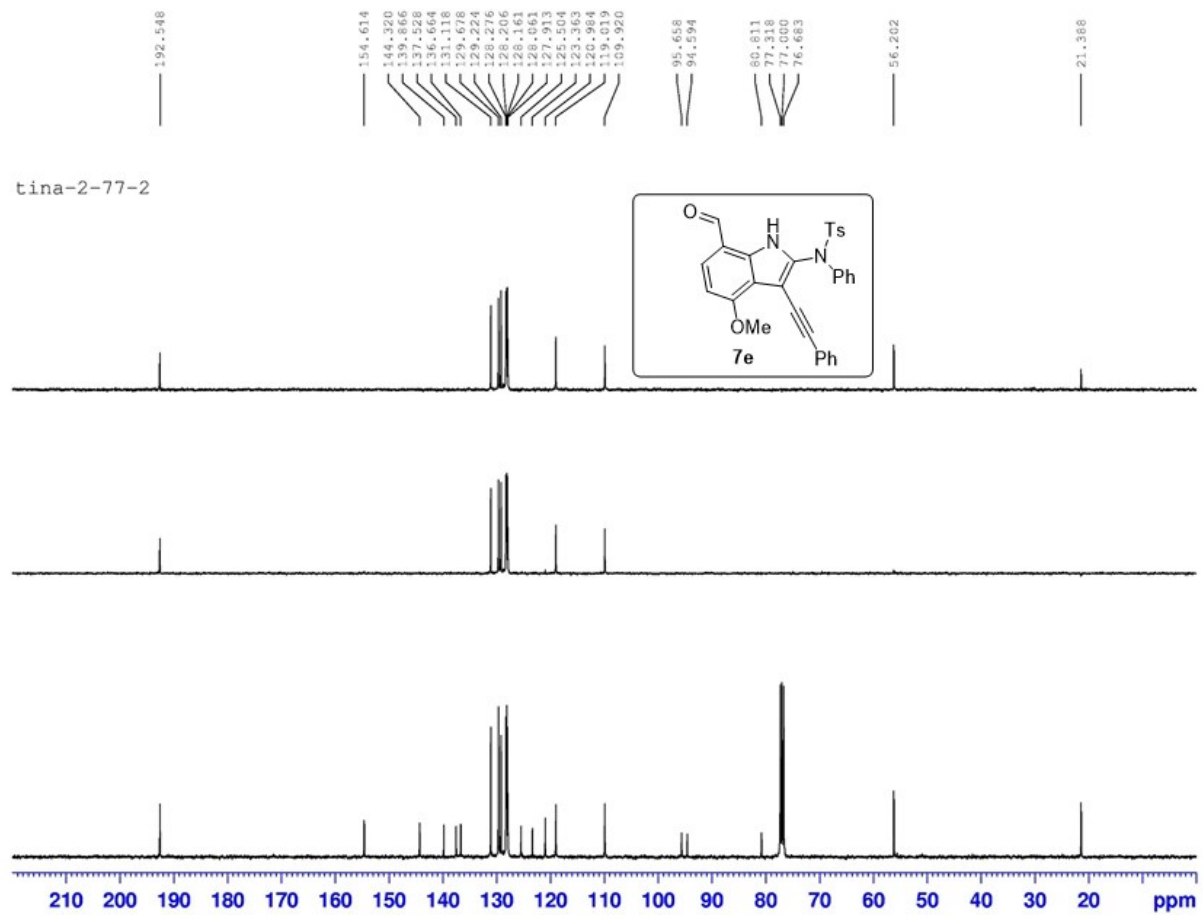



tina-2-111

Current Data Parameters  
NAME 20200407  
EXPNO 2  
PROCNO 1

F2 - Acquisition Parameters  
Date\_ 20200407  
Time 15.48  
INSTRUM spect  
PROBHD 5 mm DUL 13C-1  
PULPROG zg30  
TD 32768  
SOLVENT CD2Cl2  
NS 14  
DS 0  
SWH 6410.256 Hz  
FIDRES 0.195625 Hz  
AQ 2.5559540 sec  
RG 256  
DM 78.000 usec  
DE 6.00 usec  
TE 300.0 K  
D1 2.00000000 sec  
TDO 1

----- CHANNEL f1 -----  
NUC1 1H  
P1 10.00 usec  
PL1 -2.40 dB  
SFO1 400.1528010 MHz

F2 - Processing parameters  
SI 16384  
SF 400.1500153 MHz  
WOW EM  
SSB 0  
LB 0.00 Hz  
GB 0  
PC 1.00

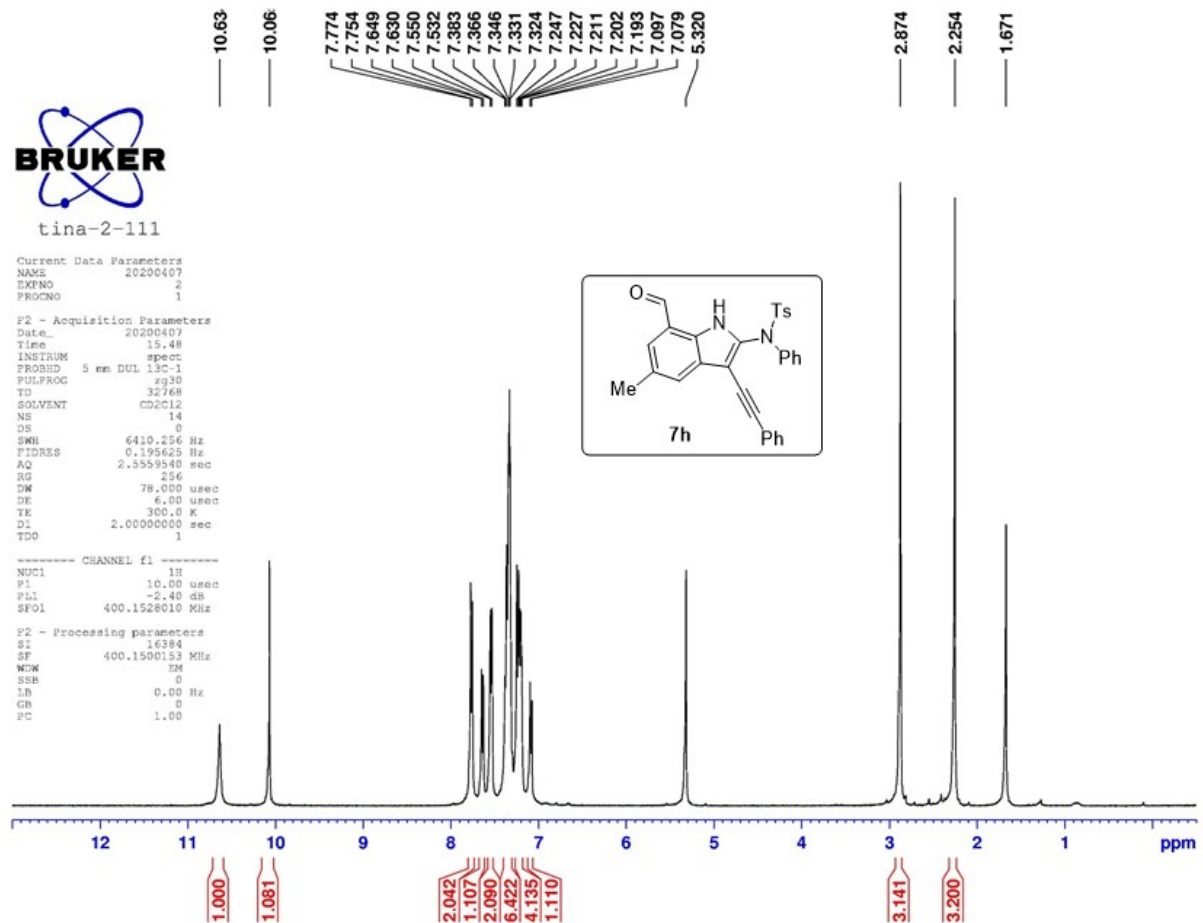

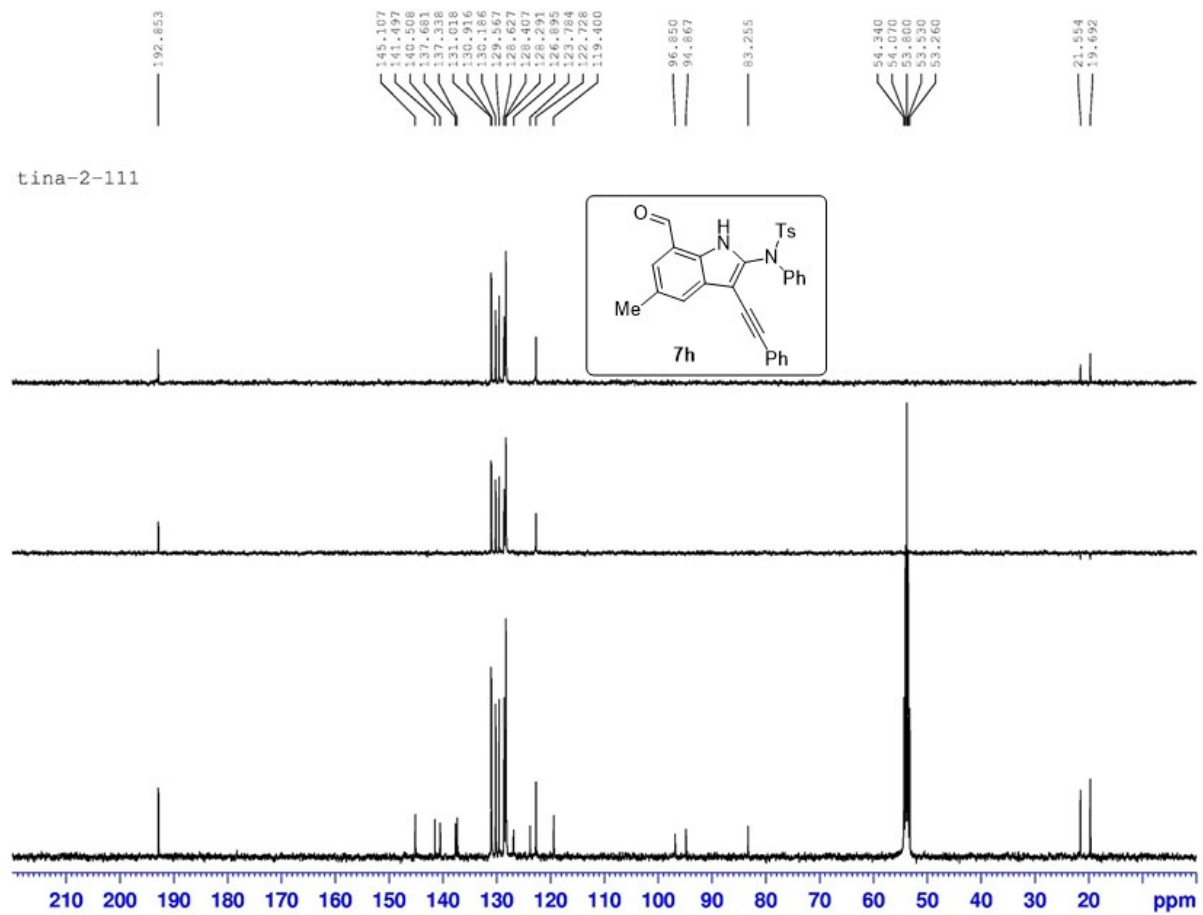



tina-2-66

Current Data Parameters  
NAME 20200226  
EXPNO 3  
PROCNO 1

F2 - Acquisition Parameters  
Date\_ 20200226  
Time 15.45  
INSTRUM spect  
PROBHD 5 mm DUL 13C-1  
PULPROG zg30  
TD 32768  
SOLVENT cdcl3  
NS 6  
DS 0  
SWH 6410.256 Hz  
FIDRES 0.195625 Hz  
AQ 2.5559540 sec  
RG 406  
DW 78.000 usec  
DE 6.00 usec  
TE 300.0 K  
D1 2.00000000 sec  
TD0 1

===== CHANNEL f1 =====  
NUC1 1H  
P1 10.00 usec  
PL1 -2.40 dB  
SFO1 400.1528010 MHz

F2 - Processing parameters  
SI 16384  
SF 400.1500171 MHz  
WDW EM  
SSB 0  
LB 0.00 Hz  
GB 0  
PC 1.00

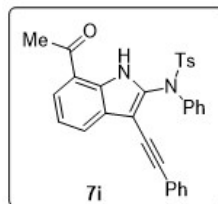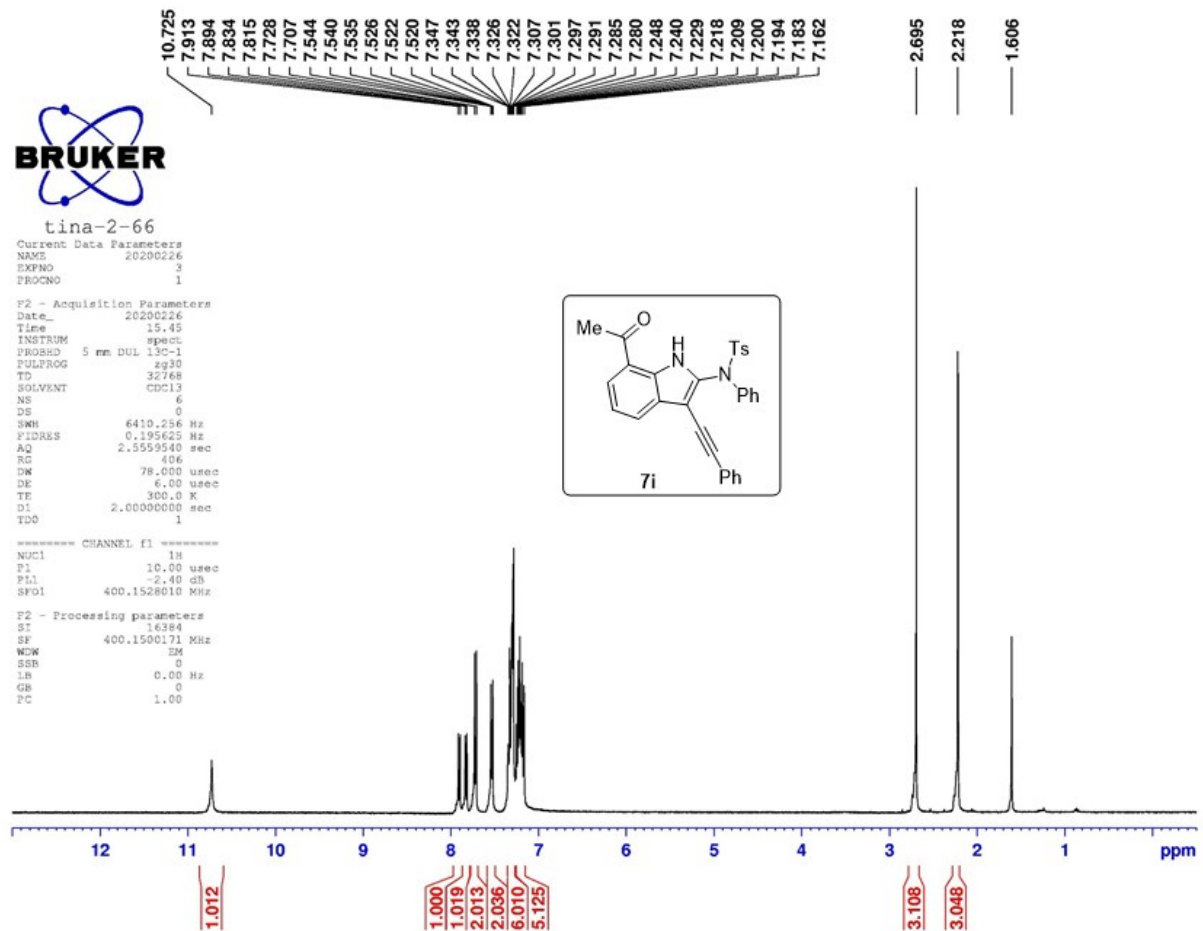



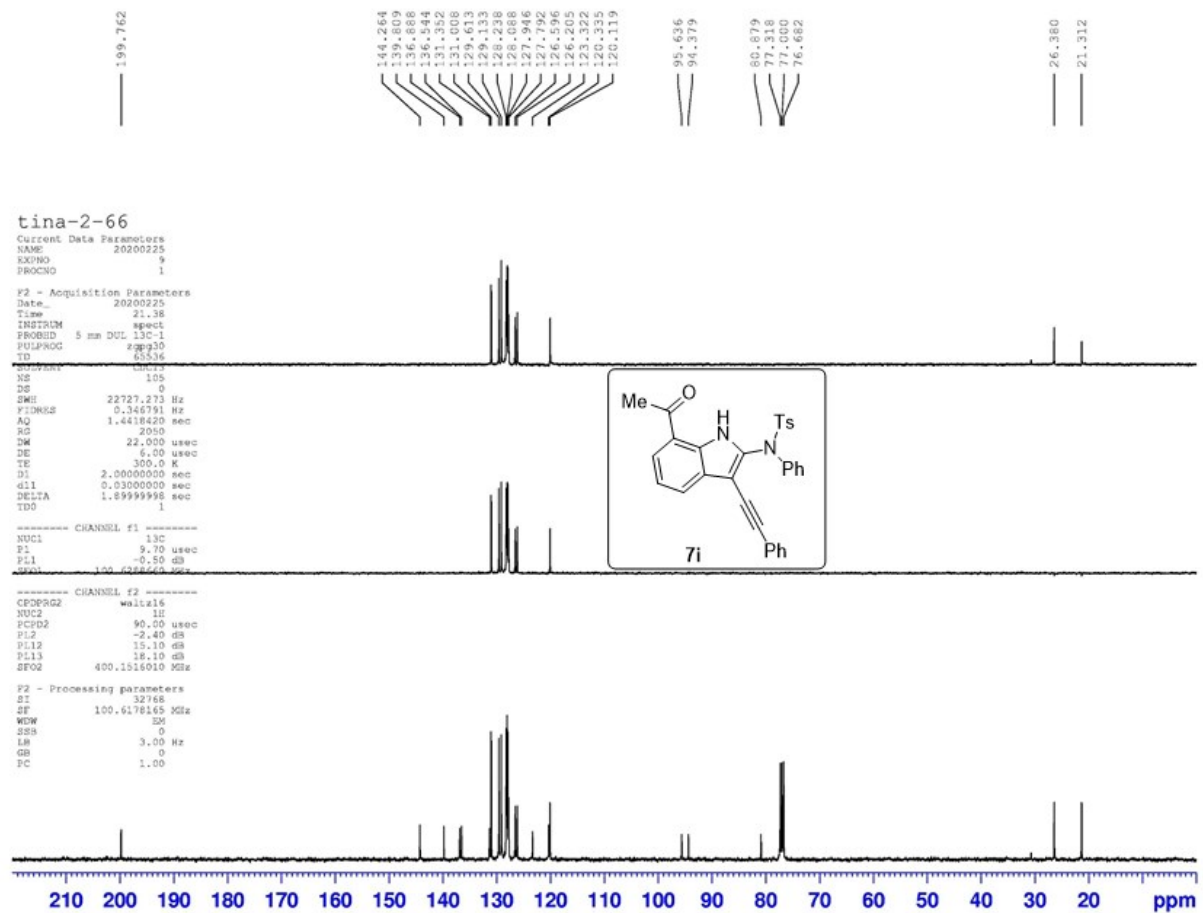



tina-02-99

Current Data Parameters  
NAME 20200324  
EXPNO 5  
PROCNO 1

F2 - Acquisition Parameters  
Date\_ 20200324  
Time 23.24  
INSTRUM spect  
PROBHD 5 mm DUL 13C-1  
PULPROG zg30  
TD 32768  
SOLVENT CDCl3  
NS 31  
DS 0  
SWH 6410.256 Hz  
FIDRES 0.195625 Hz  
AQ 2.5559540 sec  
RG 575  
DM 78.000 usec  
DE 6.00 usec  
TE 300.0 K  
D1 2.00000000 sec  
TDO 1

----- CHANNEL f1 -----  
NUC1 1H  
P1 10.00 usec  
PL1 -2.40 dB  
SFO1 400.1528010 MHz

F2 - Processing parameters  
SI 16384  
SF 400.1500174 MHz  
WDW EM  
SSB 0  
LB 0.00 Hz  
GB 0  
PC 1.00

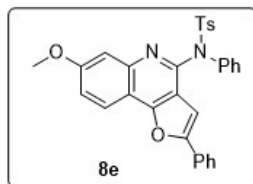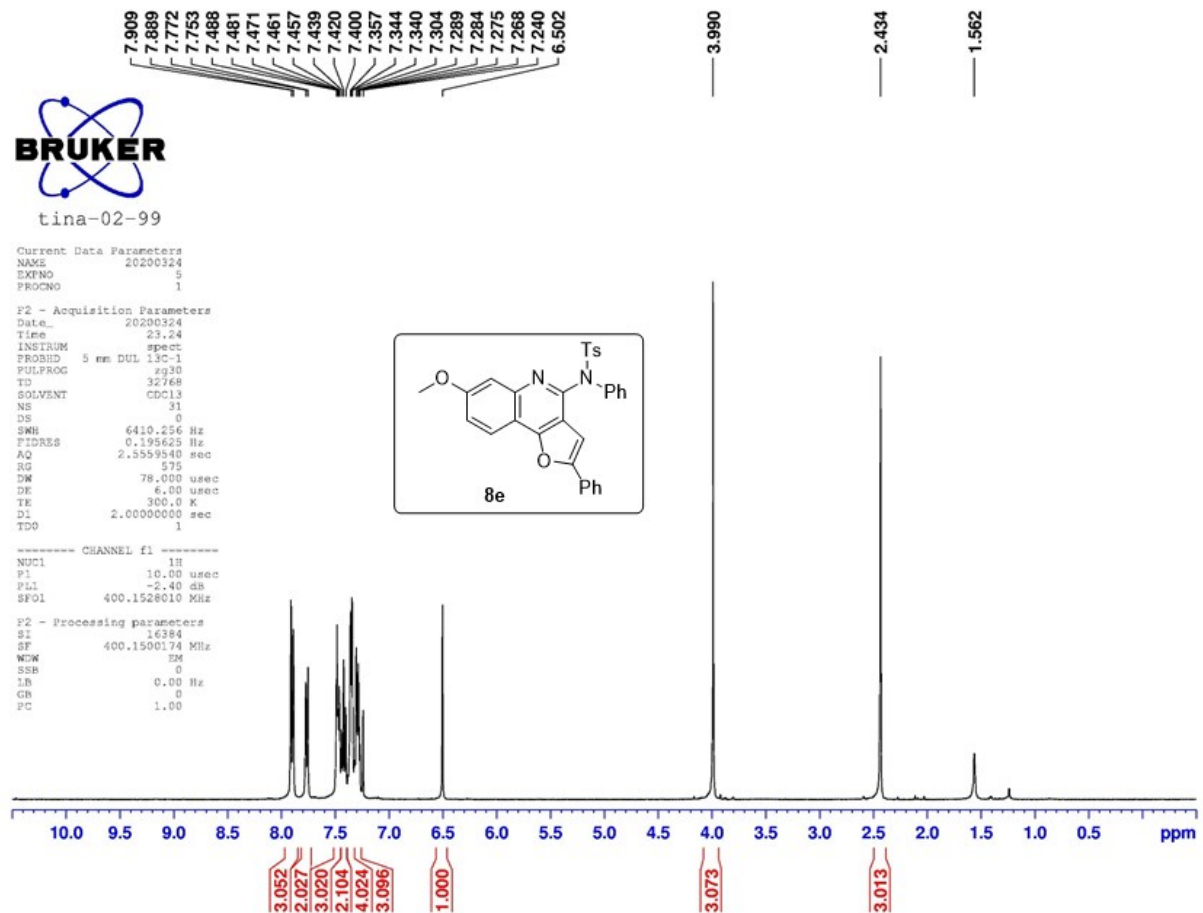

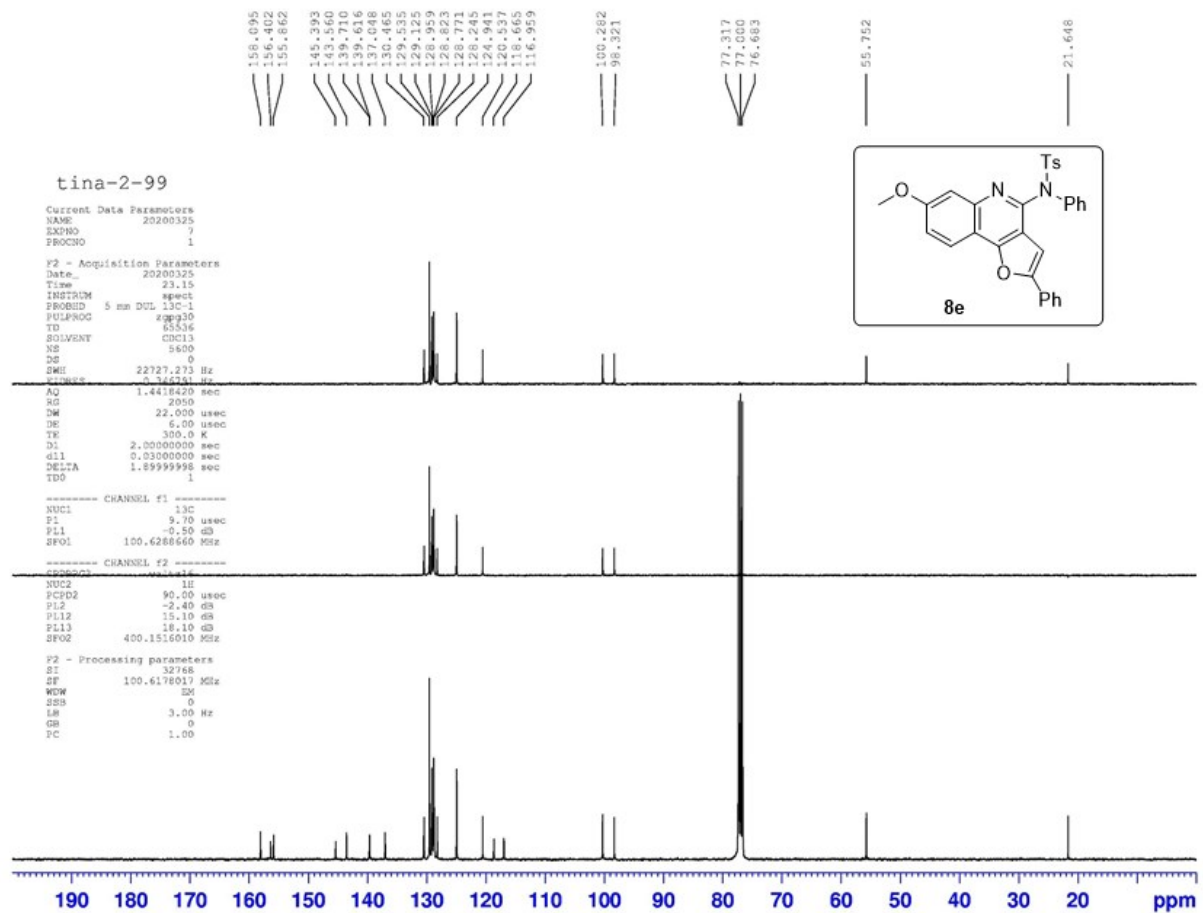



tina-2-126

Current Data Parameters  
NAME 20200423  
EXPNO 2  
PROCNO 1

F2 - Acquisition Parameters  
Date\_ 20200423  
Time 19:55  
INSTRUM spect  
PROBHD 5 mm DUL 13C-1  
PULPROG zg30  
TD 32768  
SOLVENT CDCl3  
NS 20  
DS 0  
SWH 6410.256 Hz  
FIDRES 0.195625 Hz  
AQ 2.5559540 sec  
RG 322  
DM 78.000 usec  
DE 6.00 usec  
TE 300.0 K  
D1 2.00000000 sec  
TDO 1

----- CHANNEL f1 -----  
NUC1 1H  
P1 10.00 usec  
PL1 -2.40 dB  
SFO1 400.1528010 Mhz

F2 - Processing parameters  
SI 16384  
SF 400.1500168 Mhz  
WOW EM  
SSB 0  
LB 0.00 Hz  
GB 0  
PC 1.00

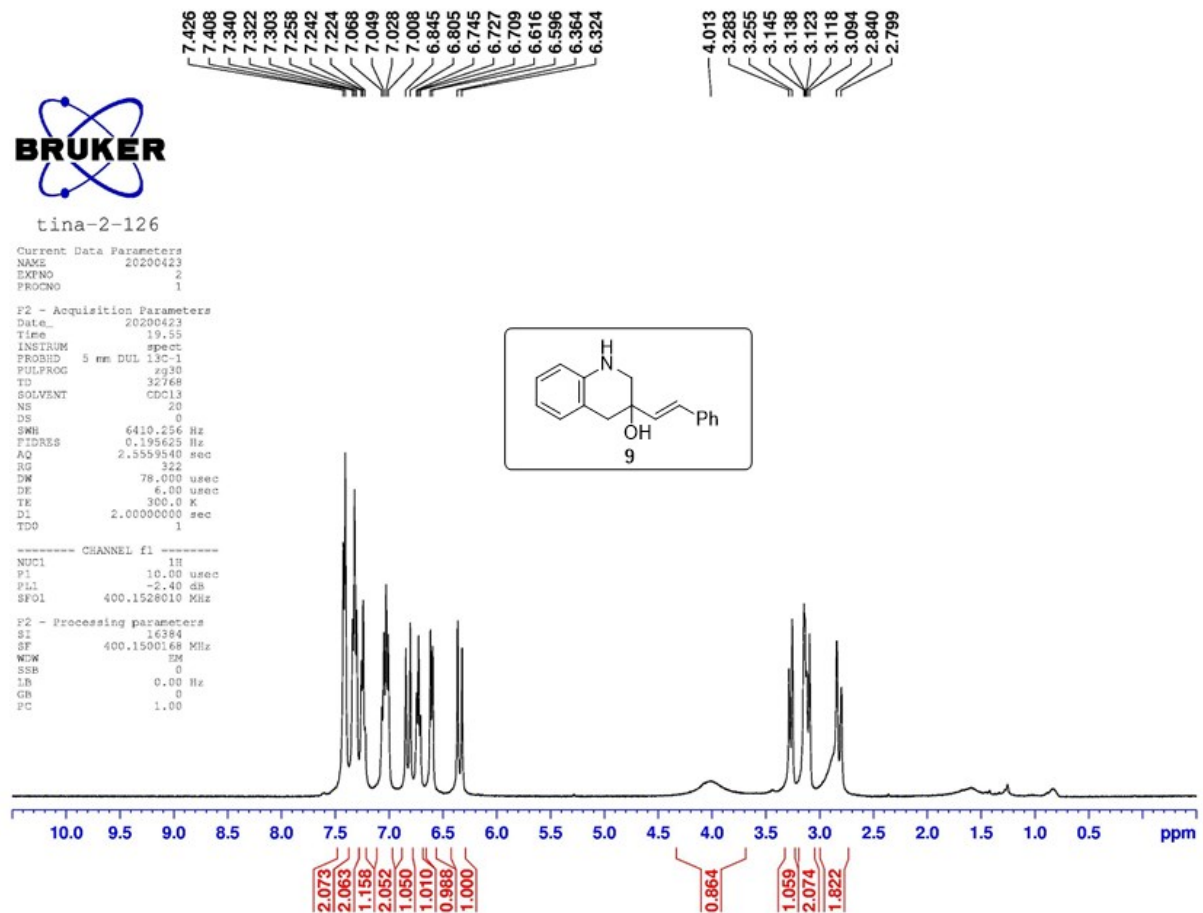

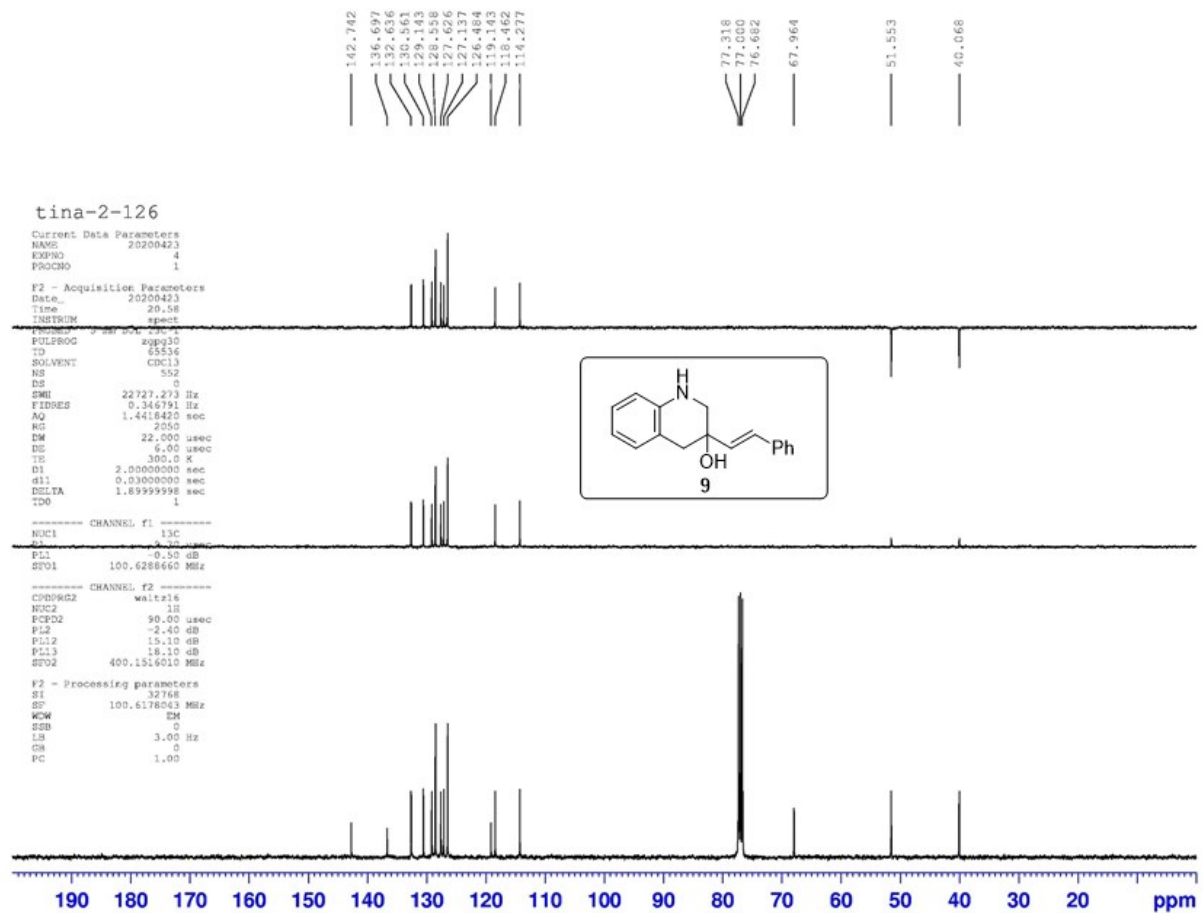

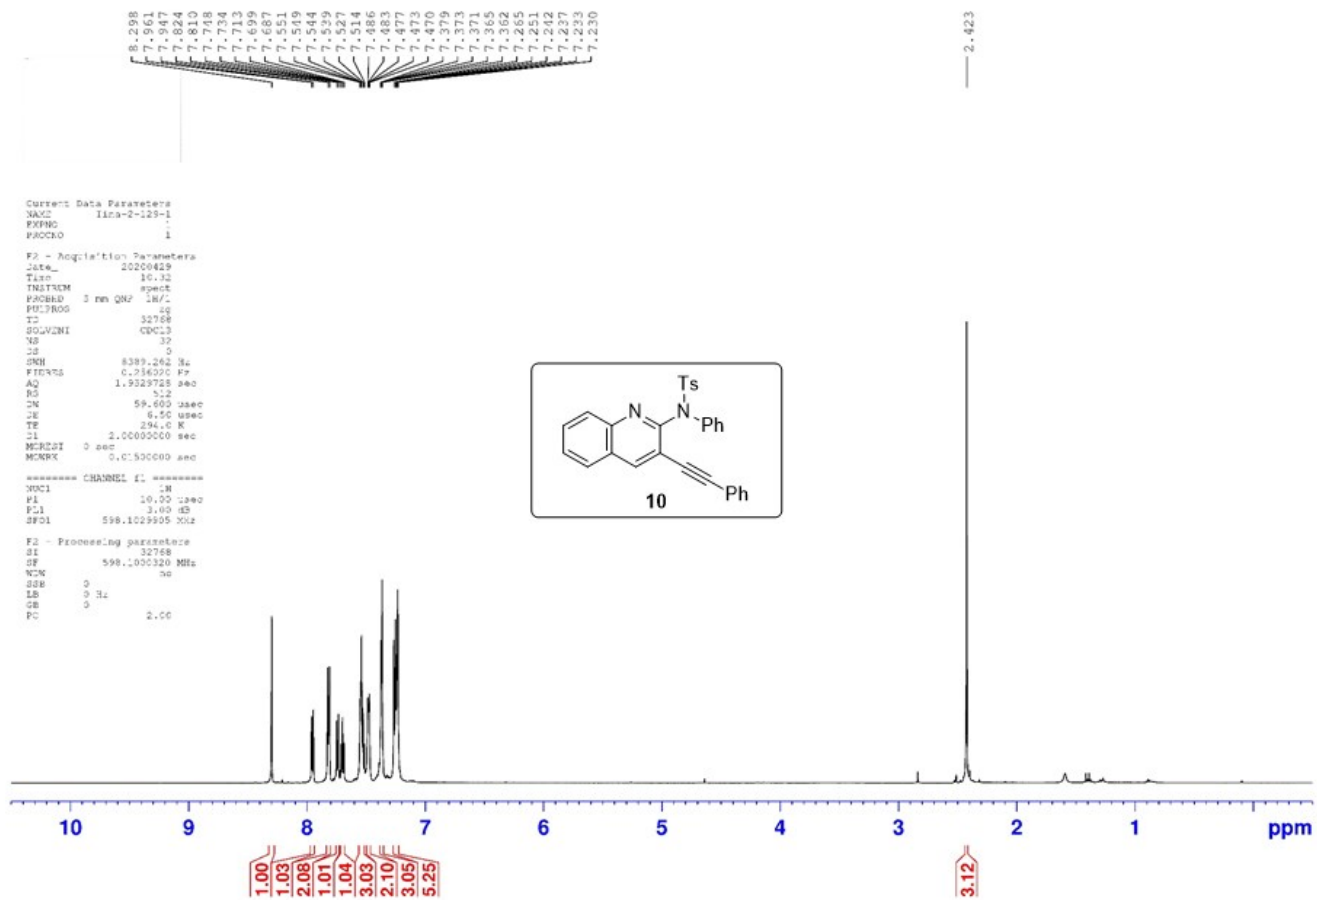

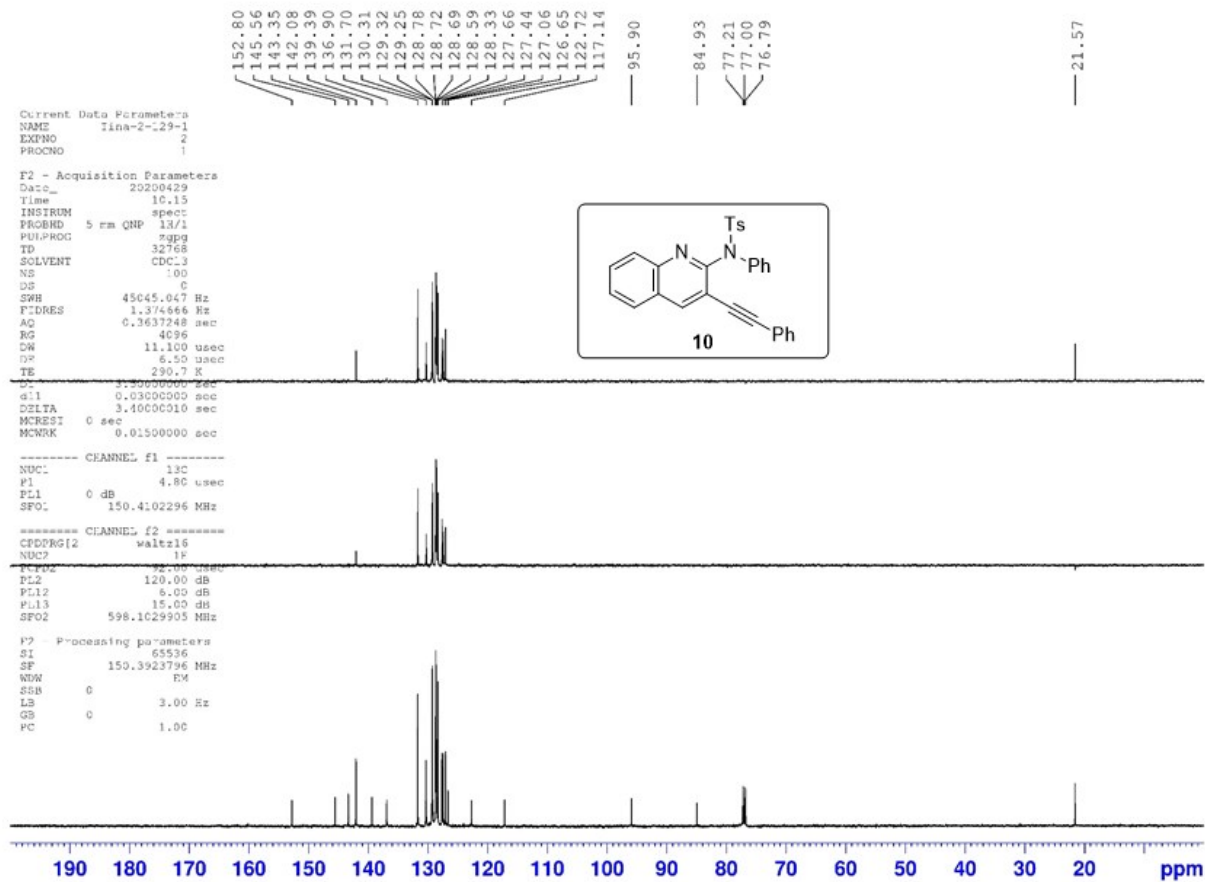

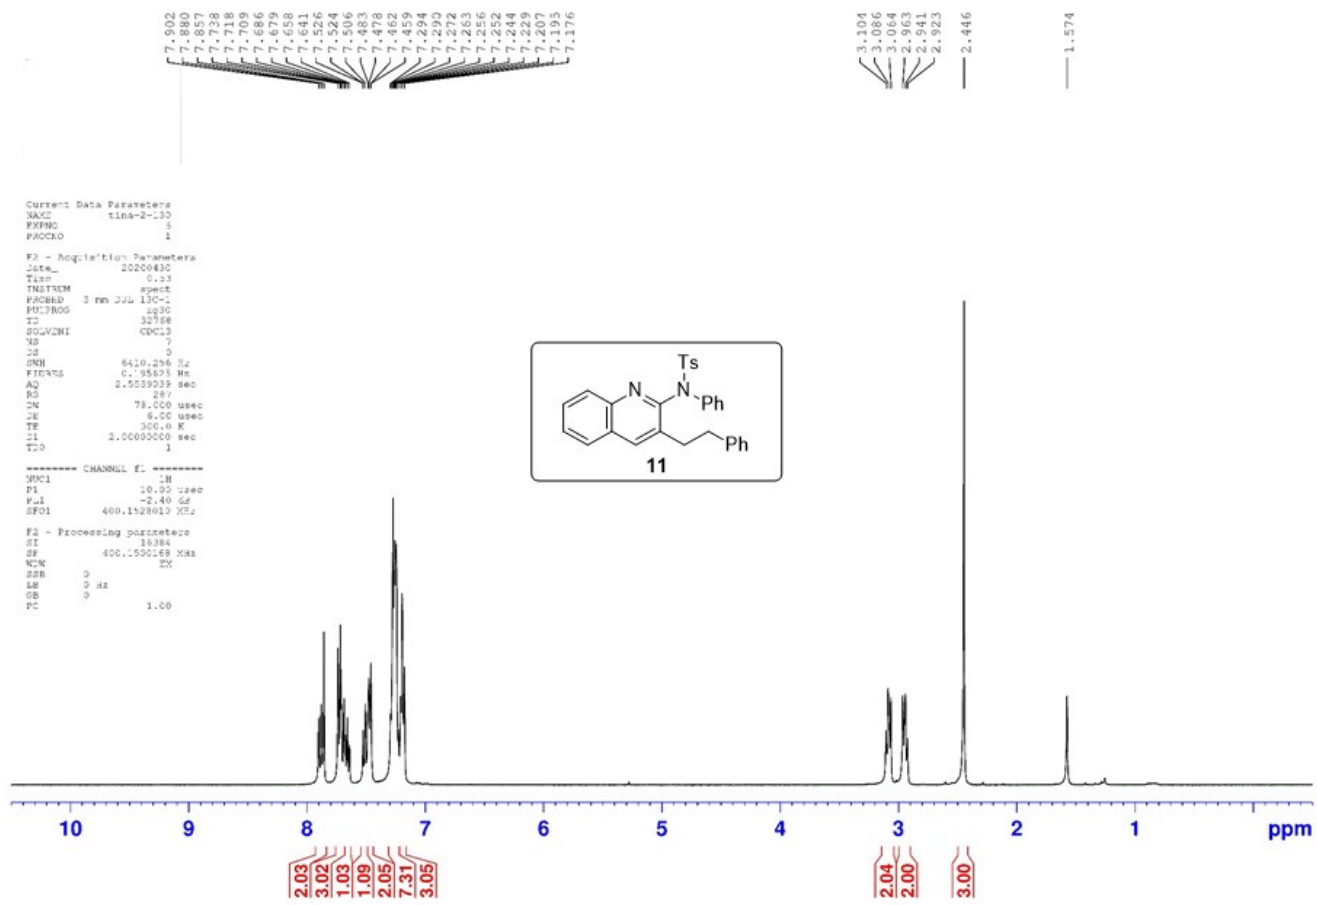



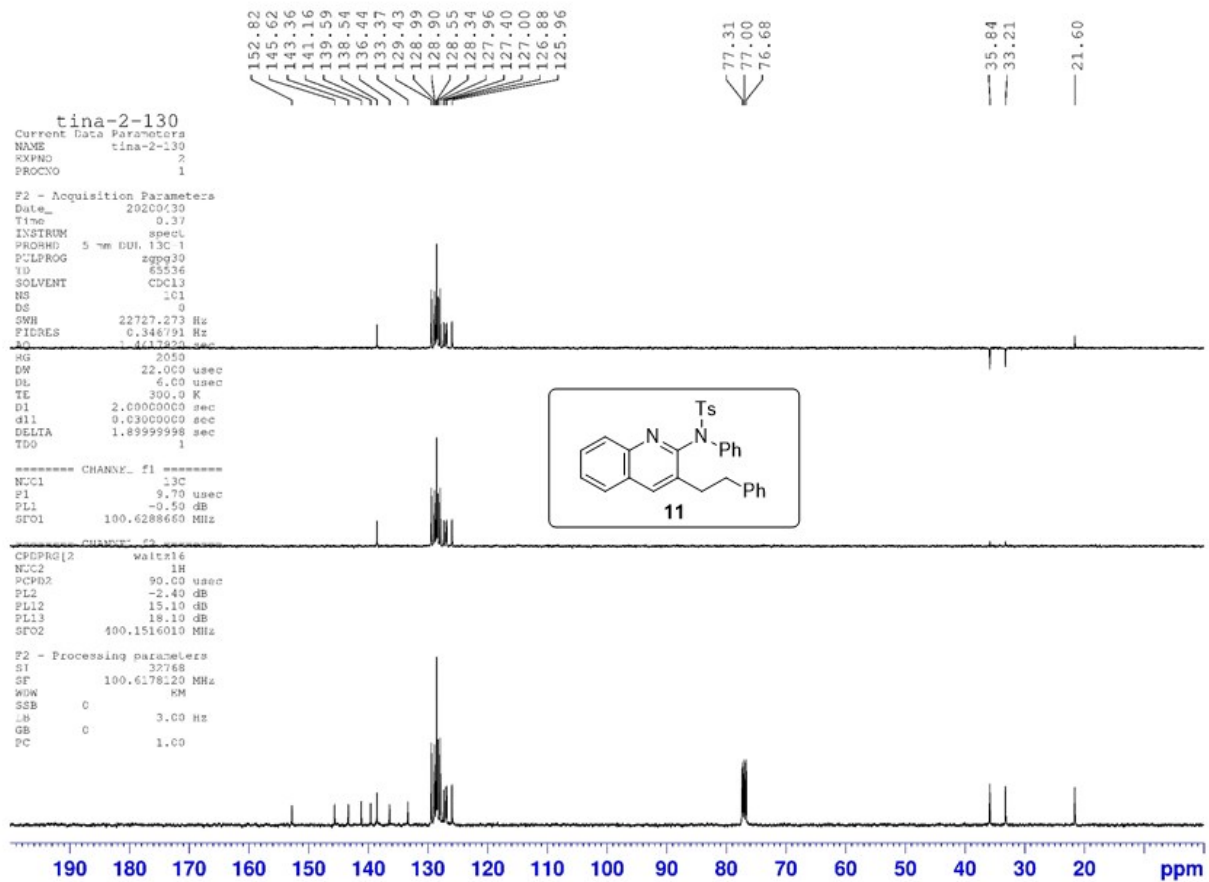

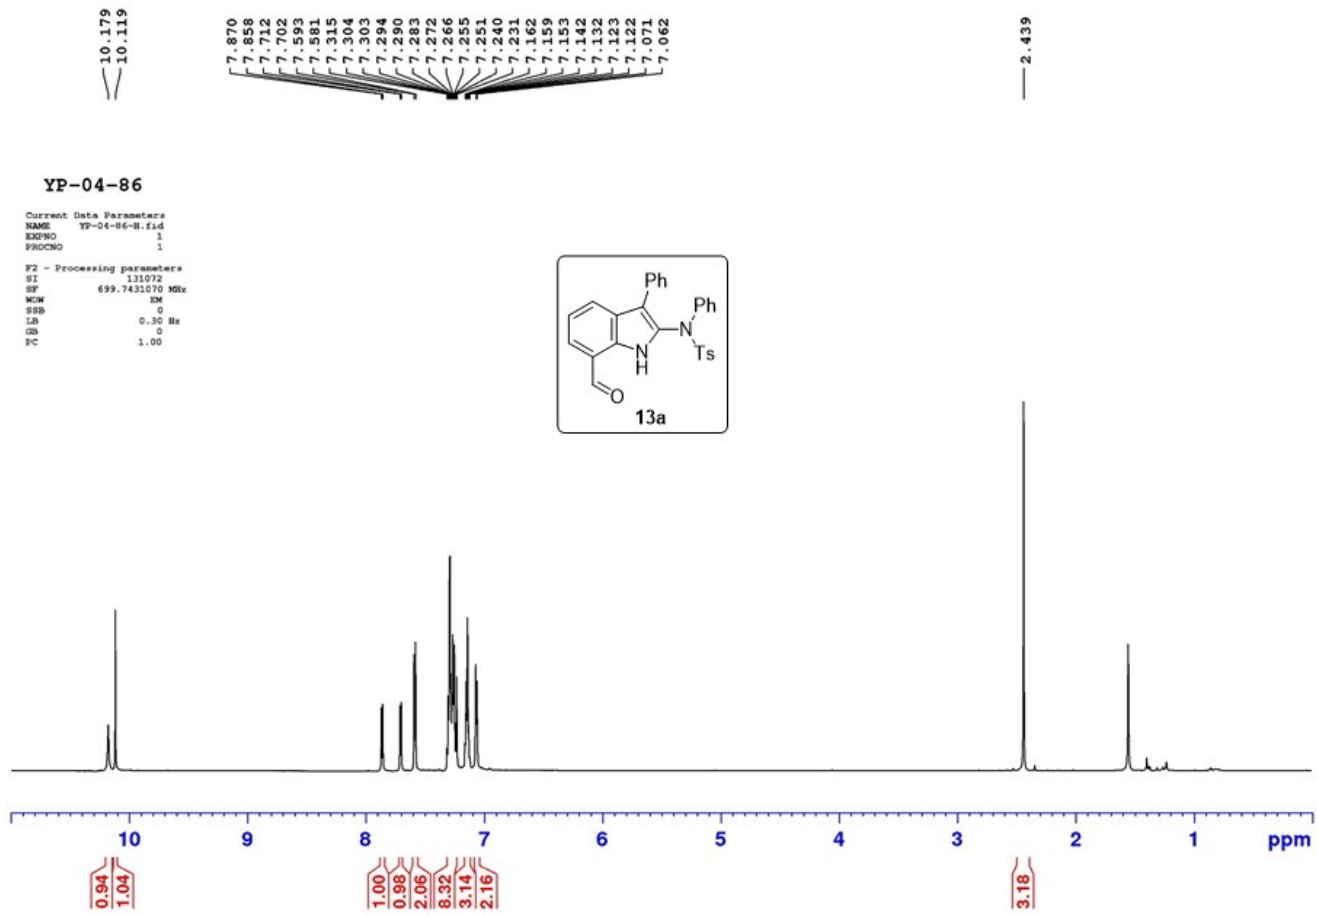

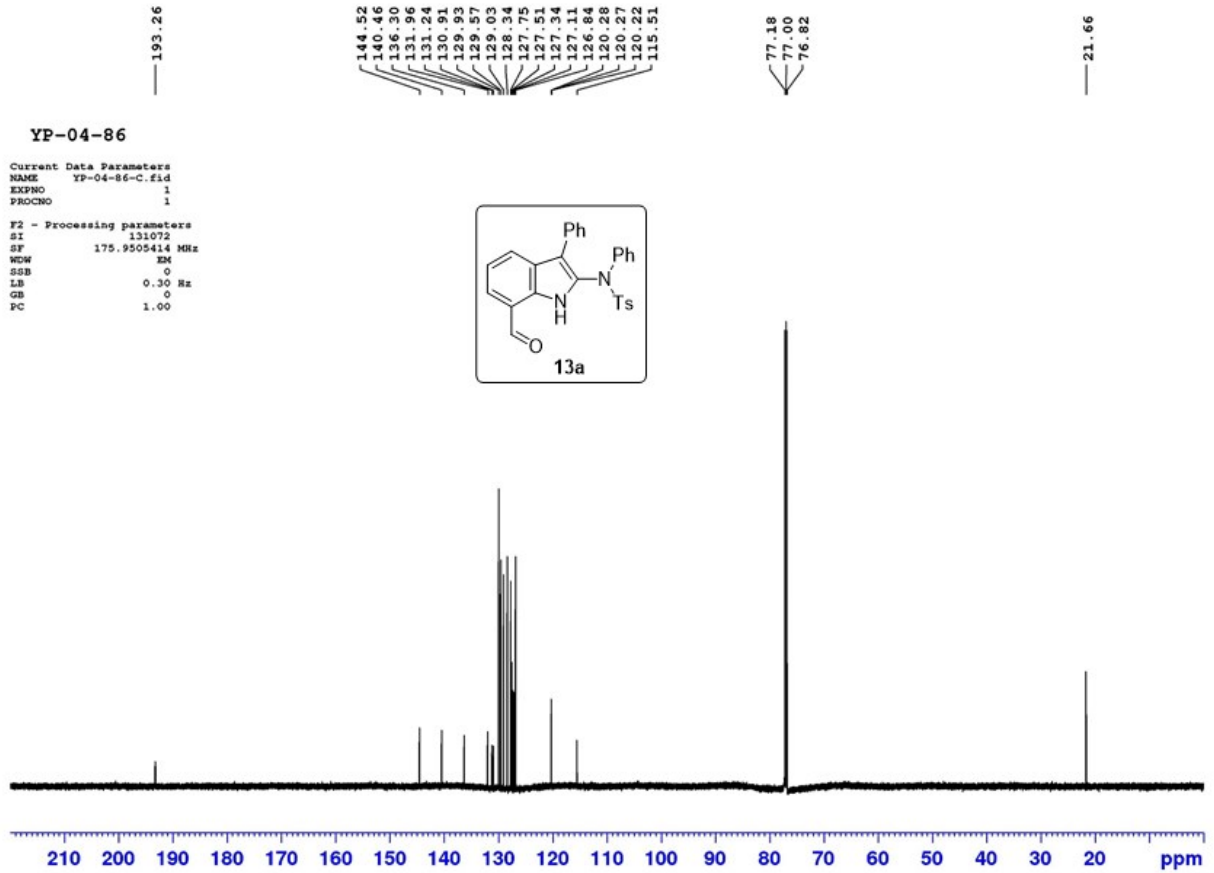

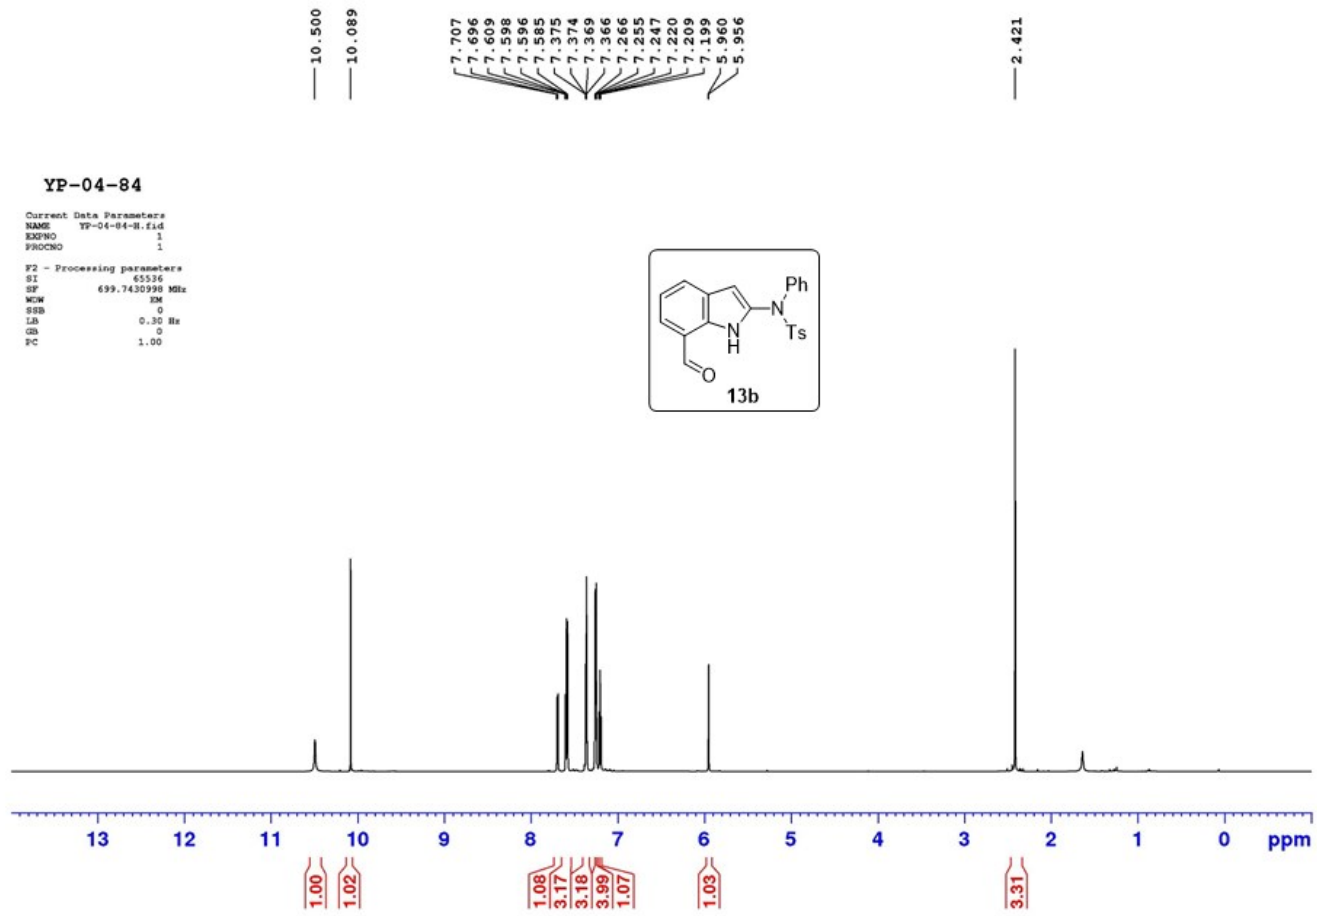

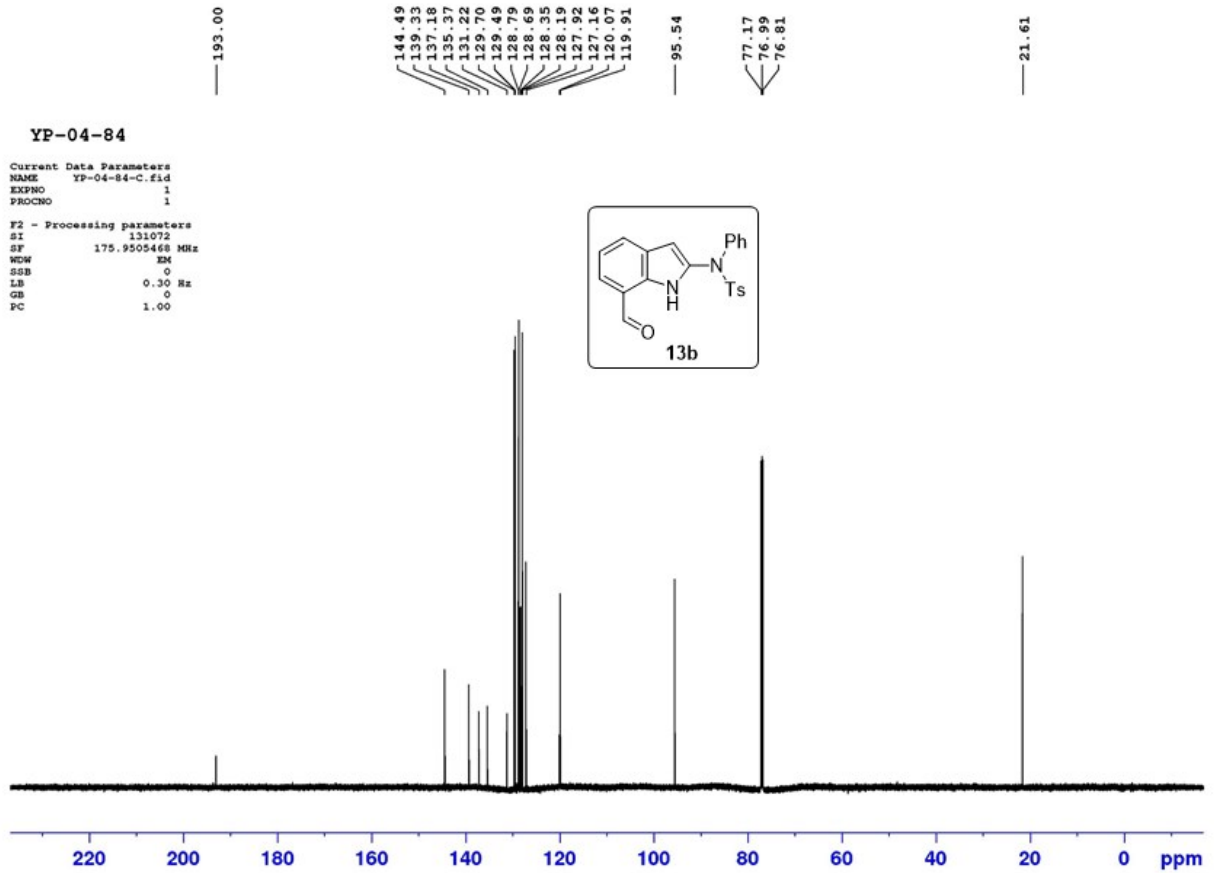

Supplement: d1qo00026h1.pdf [file d1qo00026h1.pdf]
